# Supplementary material
Source: publisher figshare collection journal article supplement (https://acs.figshare.com/ndownloader/files/26665124)
Supplement: Supplementary file 1 [file 26665124]

## Sheet: Summary
Header line description of table 1			Table 1. MS/MS spectrum database search analysis summary
Total spectrum	Number of spectrum produced by mass spectrometer
Matched spectrum	Number of spectrum matched with alignment protein		Total spectrum	Matched spectrum	Peptides	Unique peptides	Identified proteins	Quantifiable proteins
Peptides	Number of peptides whitch spectrum hit		241278	40352 (16.7%)	21027	20297	3963	3326
Unique peptides	Number of identified peptides that only come form this protein groups
Identified proteins	Number of proteins detected by spectrum search analysis
Quantifiable proteins	Number of proteins quantifiable		Table 2. Differentially expressed protein summary (Filtered with threshold value of expression fold change and P value < 0.05)
Header line description of worksheet "Protein_quant"			Compare group	Regulated type	fold change >1.2	fold change >1.3	fold change >1.5	fold change >2
Protein accession	Protein accession number of database used for search		N7/N18	up-regulated	532	506	428	235
Protein description	Protein functional description			down-regulated	987	968	905	702
Gene name	Indicates the name of the gene that code for the protein sequence		N_FuZhen/N_ChuZhen	up-regulated	20	12	5	0
MW [kDa]	Protein molecular weight ,unit [kDa]			down-regulated	14	12	7	1
Score	A simple rule to be used to judge whether a result is significant or not		N13/N27	up-regulated	499	399	272	98
Coverage [%]	Percent of identified peptdie sequence covering in protein sequence			down-regulated	523	433	314	111
Peptides	Number of peptides whitch spectrum hit		N14/N9	up-regulated	301	210	90	26
PSMs	Number of spectrum which protein matched			down-regulated	590	494	298	81
Unique peptides	Number of identified peptides that only come form this protein groups		N11/N15	up-regulated	884	843	692	315
				down-regulated	487	434	305	108
Header line description of worksheet "Peptide_quant"			N12/N28	up-regulated	584	503	306	69
ID	Identified peptide index number			down-regulated	320	246	142	31
Sequence	Identified peptide amino acid sequence
Protein accession	Protein accession number of database used for search
Protein description	Protein functional description
Charge	Carried charge of peptide
m/z	Mass-to-charge ratio of peptide
mass error [ppm]	Parts per million ratio of peptide mass error between the theory and practice
PEP	The maximal posterior error probability for peptides
Score	A simple rule to be used to judge whether a result is significant or not
Unique [yes/no]	When marked with 'yes', this particular peptide is unique to a single identified protein group

## Sheet: Protein_quant
Protein accession	Protein description	Gene name	MW [kDa]	Score	Coverage [%]	Peptides	PSMs	Unique peptides	N11	N12	N13	N14	N15	N18	N27	N28	N7	N9	N7/N18 Ratio	N7/N18 P value	N_FuZhen/N_ChuZhen Ratio	N_FuZhen/N_ChuZhen P value	N13/N27 Ratio	N13/N27 P value	N14/N9 Ratio	N14/N9 P value	N11/N15 Ratio	N11/N15 P value	N12/N28 Ratio	N12/N28 P value
A0A0A0MRZ8	Immunoglobulin kappa variable 3D-11 OS=Homo sapiens OX=9606 GN=IGKV3D-11 PE=3 SV=6	IGKV3D-11	12.625	8.816	7.8	1	3	1	0.106	0.171	0.229	0.132	0.576	0.142	4.472	0.14	0.207		1.458		0.127	0.28612	0.051				0.184		1.221
A0A0B4J1V1	Immunoglobulin heavy variable 3-21 OS=Homo sapiens OX=9606 GN=IGHV3-21 PE=1 SV=1	IGHV3-21	12.839	6.4015	18.8	2	2	1	0.389	0.762	0.541	5.844	0.492	0.379	0.433	0.548	0.98	0.415	2.586		3.757	0.175975	1.249		14.082		0.791		1.391
A0A0C4DH34	Immunoglobulin heavy variable 4-28 OS=Homo sapiens OX=9606 GN=IGHV4-28 PE=3 SV=1	IGHV4-28	13.124	7.3677	7.7	1	4	1	0.382	0.366	0.183	0.196	0.836	0.19	5.631	0.306	0.13	0.31	0.684	0.99096	0.173	0.16706	0.032	0.0072408	0.632	0.54756	0.457	0.092184	1.196	0.90078
A0AUZ9	KAT8 regulatory NSL complex subunit 1-like protein OS=Homo sapiens OX=9606 GN=KANSL1L PE=1 SV=2	KANSL1L	112.25	5.923	1.5	1	1	1
A0AV96	RNA-binding protein 47 OS=Homo sapiens OX=9606 GN=RBM47 PE=1 SV=2	RBM47	64.098	6.5582	2	1	1	1	1.124	1.037	1.269	0.773	0.664	1.594	1.086	0.974	0.461	1.009	0.289		0.876	0.52362	1.169		0.766		1.693		1.065
A0AVT1	Ubiquitin-like modifier-activating enzyme 6 OS=Homo sapiens OX=9606 GN=UBA6 PE=1 SV=1	UBA6	117.97	205.17	15.6	14	21	14	1.137	1.39	0.821	1.047	0.738	1.169	0.936	1.184	0.778	1.098	0.666	2.3328e-05	1.009	0.99246	0.877	0.053862	0.954	0.147199	1.541	0.00027507	1.174	0.0036364
A0FGR8	Extended synaptotagmin-2 OS=Homo sapiens OX=9606 GN=ESYT2 PE=1 SV=1	ESYT2	102.36	33.866	6.5	5	7	5	1.603	1.226	1.023	0.821	1.128	1.055	0.991	0.989	0.753	0.759	0.714	0.32248	1.102	0.66816	1.032	0.96484	1.082	0.7749	1.421	0.40988	1.24	0.25182
A0MZ66	Shootin-1 OS=Homo sapiens OX=9606 GN=SHTN1 PE=1 SV=4	SHTN1	71.639	6.6994	1.6	1	2	1
A0PJW6	Transmembrane protein 223 OS=Homo sapiens OX=9606 GN=TMEM223 PE=1 SV=1	TMEM223	22.049	6.4197	5	1	1	1
A1IGU5	Rho guanine nucleotide exchange factor 37 OS=Homo sapiens OX=9606 GN=ARHGEF37 PE=2 SV=2	ARHGEF37	76.277	16.66	2.8	2	2	2	0.756	1.34	0.889	0.842	0.872	1.248	0.78	1.616	1.002	1.058	0.803		0.866	0.44852	1.14		0.796		0.867		0.829
A1L0T0	Acetolactate synthase-like protein OS=Homo sapiens OX=9606 GN=ILVBL PE=1 SV=2	ILVBL	67.867	36.632	6.8	4	5	4	1.215	0.958	0.916	0.783	0.518	1.904	0.821	0.962	0.556	1.242	0.292	0.0143584	0.813	0.5758	1.116	0.188644	0.63	0.0074845	2.346	0.05284	0.996	0.7969
A2NJV5	Immunoglobulin kappa variable 2-29 OS=Homo sapiens OX=9606 GN=IGKV2-29 PE=3 SV=2	IGKV2-29	13.085	9.7466	10.8	1	1	1	0.722	1.953	0.392	1.091	1.392	0.705	0.88	1.09	1.424	1.231	2.02		1.054	0.84884	0.445		0.886		0.519		1.792
A2RRP1	Neuroblastoma-amplified sequence OS=Homo sapiens OX=9606 GN=NBAS PE=1 SV=2	NBAS	268.57	42.559	2.5	6	7	6	1.341	0.987	0.781	0.946	0.679	1.405	1.318	1.05	0.482	0.761	0.343	0.0197401	0.87	0.5152	0.593	0.00147768	1.243	0.20226	1.975	6.1281e-05	0.94	0.89156
A2RTX5	Probable threonine--tRNA ligase 2, cytoplasmic OS=Homo sapiens OX=9606 GN=TARSL2 PE=1 SV=1	TARSL2	92.644	35.566	2.6	1	1	1	1.105	1.056	1.288	0.796	0.959	1.198	1.091	0.994	0.819	1.042	0.684		0.958	0.58798	1.181		0.764		1.152		1.062
A2RUS2	DENN domain-containing protein 3 OS=Homo sapiens OX=9606 GN=DENND3 PE=1 SV=2	DENND3	135.89	19.927	2.6	3	5	3	1.211	1.797	0.724	0.887	0.74	0.903	1.349	0.954	0.768	0.883	0.85	0.48896	1.116	0.7319	0.537	0.195444	1.005	0.99146	1.636	0.34024	1.884	0.055339
A3KMH1	von Willebrand factor A domain-containing protein 8 OS=Homo sapiens OX=9606 GN=VWA8 PE=1 SV=2	VWA8	214.82	80.72	6.1	11	11	11	1.261	1.062	0.892	0.881	0.839	1.351	1.214	0.725	0.618	1.201	0.457	0.00166265	0.884	0.48996	0.735	0.050978	0.734	0.035081	1.503	0.0053415	1.465	0.00174372
A4D0S4	Laminin subunit beta-4 OS=Homo sapiens OX=9606 GN=LAMB4 PE=2 SV=1	LAMB4	193.54	6.1377	0.6	1	1	1	1.352	1.015	0.926	0.704	0.589	1.986	0.776	0.969	0.328	1.213	0.165		0.782	0.43952	1.193		0.58		2.295		1.047
A4D126	D-ribitol-5-phosphate cytidylyltransferase OS=Homo sapiens OX=9606 GN=ISPD PE=1 SV=2	ISPD	49.872	46.421	12.6	5	5	5	1.129	0.98	0.93	1.021	0.605	0.989	0.933	1.397	1.102	1.244	1.114	0.2001	0.999	0.82386	0.997	0.37212	0.821	0.036239	1.866	0.0237	0.702	0.0070847
A4D1P6	WD repeat-containing protein 91 OS=Homo sapiens OX=9606 GN=WDR91 PE=1 SV=2	WDR91	83.343	134.28	11	6	6	6	0.773	0.967	0.968	1.199	1.229	0.996	1.061	1.21	1.386	0.996	1.392	0.052316	0.964	0.64544	0.912	0.3296	1.204	0.0108572	0.629	0.0063642	0.799	0.199442
A4D2P6	Delphilin OS=Homo sapiens OX=9606 GN=GRID2IP PE=3 SV=2	GRID2IP	132.27	-2	0.9	1	1	1	1.239	2.202	0.652	1.198	1.021	0.62	0.76	1.196	0.576	0.911	0.929		1.301	0.54392	0.858		1.315		1.214		1.841
A5D8V6	Vacuolar protein sorting-associated protein 37C OS=Homo sapiens OX=9606 GN=VPS37C PE=1 SV=2	VPS37C	38.658	6.132	3.4	1	1	1
A5PLN9	Trafficking protein particle complex subunit 13 OS=Homo sapiens OX=9606 GN=TRAPPC13 PE=1 SV=2	TRAPPC13	46.523	13.25	4.1	2	2	2	1.2	1.392	0.801	1.038	0.688	1.401	0.99	0.856	0.561	1.184	0.4		0.975	0.83638	0.809		0.877		1.744		1.626
A5YKK6	CCR4-NOT transcription complex subunit 1 OS=Homo sapiens OX=9606 GN=CNOT1 PE=1 SV=2	CNOT1	266.94	48.529	3.1	7	8	7	1.177	1.272	0.964	0.825	0.65	1.377	0.973	1.074	0.573	0.987	0.416	0.0095014	0.951	0.75414	0.991	0.31874	0.836	0.028763	1.811	0.0092829	1.184	0.0199232
A6NC98	Coiled-coil domain-containing protein 88B OS=Homo sapiens OX=9606 GN=CCDC88B PE=1 SV=1	CCDC88B	164.81	83.055	8.3	12	14	11	1.384	1.96	0.639	1.091	0.863	0.861	0.916	1.091	0.722	0.966	0.839	0.6468	1.234	0.57504	0.698	0.00071905	1.129	0.041863	1.604	4.4009e-06	1.797	0.0003765
A6NDG6	Glycerol-3-phosphate phosphatase OS=Homo sapiens OX=9606 GN=PGP PE=1 SV=1	PGP	34.006	80.598	23.1	6	10	6	0.943	0.831	1.073	0.953	1.473	1.208	0.81	0.988	1.724	0.898	1.427	0.023637	1.027	0.92808	1.325	0.0050978	1.061	0.32718	0.64	0.0125429	0.841	0.22574
A6NDU8	UPF0600 protein C5orf51 OS=Homo sapiens OX=9606 GN=C5orf51 PE=1 SV=1	C5orf51	33.62	6.1035	6.8	1	1	1
A6NFH5	Fatty acid-binding protein 12 OS=Homo sapiens OX=9606 GN=FABP12 PE=2 SV=2	FABP12	15.564	5.8479	7.1	1	1	1	0.863	0.788	1.02	1.347	1.422	0.605	1.288	1.108	1.566	0.974	2.588		1.035	0.8437	0.792		1.383		0.607		0.711
A6NHQ2	rRNA/tRNA 2'-O-methyltransferase fibrillarin-like protein 1 OS=Homo sapiens OX=9606 GN=FBLL1 PE=3 SV=2	FBLL1	34.803	7.3415	3.3	1	2	1	1.002	1.201	0.988	0.858	1.132	1.014	1.213	0.917	1.014	1.196	1		0.925	0.3317	0.815		0.717		0.885		1.31
A6NHR9	Structural maintenance of chromosomes flexible hinge domain-containing protein 1 OS=Homo sapiens OX=9606 GN=SMCHD1 PE=1 SV=2	SMCHD1	226.37	79.488	5.8	9	9	9	1.076	1.021	0.715	0.926	0.849	1.873	1.078	0.753	0.775	1.01	0.414	0.0026574	0.811	0.36742	0.663	0.003004	0.917	0.114078	1.267	0.078539	1.356	0.0005635
A6NJG2	Ankyrin repeat domain-containing protein SOWAHD OS=Homo sapiens OX=9606 GN=SOWAHD PE=2 SV=1	SOWAHD	33.803	20.911	8.3	2	2	2	1.22	1.98	0.709	1.055	0.744	0.686	0.963	1.162	0.536	1.226	0.781	0.49436	1.15	0.8045	0.736	0.107678	0.861	0.064402	1.64	0.066841	1.704	0.000143123
A8MXV4	Nucleoside diphosphate-linked moiety X motif 19 OS=Homo sapiens OX=9606 GN=NUDT19 PE=1 SV=1	NUDT19	42.233	18.455	7.2	2	2	2	1.296	0.828	1.043	0.622	1.031	1.044	1.439	0.908	0.952	1.294	0.912		0.829	0.20932	0.725		0.481		1.257		0.912
B0I1T2	Unconventional myosin-Ig OS=Homo sapiens OX=9606 GN=MYO1G PE=1 SV=2	MYO1G	116.44	110.51	13.8	12	15	12	1.076	1.349	0.627	1.305	0.822	1.28	1.05	0.772	0.713	1.044	0.557	0.0070154	1.021	0.9573	0.597	4.245e-05	1.25	0.0122033	1.309	0.0103206	1.747	4.0981e-06
B7ZAP0	Rab GTPase-activating protein 1-like, isoform 10 OS=Homo sapiens OX=9606 GN=RABGAP1L PE=1 SV=1	RABGAP1L	29.038	5.9204	7.9	2	2	1
C9J7I0	UBAP1-MVB12-associated (UMA)-domain containing protein 1 OS=Homo sapiens OX=9606 GN=UMAD1 PE=2 SV=2	UMAD1	15.2	9.4462	10.2	1	1	1	0.761	0.757	1.176	0.953	0.931	1.503	0.991	1.144	1.514	0.814	1.007		0.959	0.75022	1.187		1.171		0.817		0.662
O00116	Alkyldihydroxyacetonephosphate synthase, peroxisomal OS=Homo sapiens OX=9606 GN=AGPS PE=1 SV=1	AGPS	72.911	51.17	8.2	5	5	5	0.999	1.746	0.807	1.19	0.753	1.035	1.016	1.12	0.647	0.933	0.625	0.2243	1.11	0.77518	0.794	0.026363	1.275	0.027441	1.327	0.67744	1.559	0.0157017
O00139	Kinesin-like protein KIF2A OS=Homo sapiens OX=9606 GN=KIF2A PE=1 SV=3	KIF2A	79.954	11.213	2.5	2	2	2	0.987	1.082	0.674	0.973	0.777	1.219	1.621	0.744	1.345	0.994	1.103		0.945	0.8434	0.416		0.979		1.27		1.454
O00142	Thymidine kinase 2, mitochondrial OS=Homo sapiens OX=9606 GN=TK2 PE=1 SV=4	TK2	31.004	6.8784	3.4	1	1	1	1.224	0.528	2.017	0.73	0.66	1.384	1.604	0.951	0.371	0.428	0.268		0.969	0.79268	1.257		1.706		1.855		0.555
O00148	ATP-dependent RNA helicase DDX39A OS=Homo sapiens OX=9606 GN=DDX39A PE=1 SV=2	DDX39A	49.129	7.3312	10.1	5	5	1
O00151	PDZ and LIM domain protein 1 OS=Homo sapiens OX=9606 GN=PDLIM1 PE=1 SV=4	PDLIM1	36.071	59.327	17.9	5	5	5	1.13	1.177	0.812	1.027	0.756	1.151	1.782	0.846	0.515	0.941	0.447	0.00104197	0.851	0.49234	0.456	0.00059509	1.091	0.178104	1.495	0.00024458	1.391	0.037742
O00154	Cytosolic acyl coenzyme A thioester hydrolase OS=Homo sapiens OX=9606 GN=ACOT7 PE=1 SV=3	ACOT7	41.796	103.09	22.6	6	15	6	0.957	0.838	1.183	0.749	2.035	0.654	0.792	1.305	1.304	1.051	1.994	6.3562e-05	0.862	0.70114	1.494	2.0569e-05	0.713	0.0023961	0.47	5.097e-07	0.642	0.0027213
O00159	Unconventional myosin-Ic OS=Homo sapiens OX=9606 GN=MYO1C PE=1 SV=4	MYO1C	121.68	58.941	6.9	7	9	7	1.121	0.969	0.872	1.013	0.754	1.238	1.314	1.132	1.011	0.9	0.817	0.040544	0.934	0.66218	0.664	2.2737e-07	1.126	0.055938	1.487	0.031825	0.856	0.9004
O00160	Unconventional myosin-If OS=Homo sapiens OX=9606 GN=MYO1F PE=1 SV=3	MYO1F	124.84	134.25	17.2	18	24	18	1.207	1.737	0.602	1.248	0.801	0.901	1.04	0.96	0.755	0.987	0.838	0.31602	1.183	0.62578	0.579	3.3176e-07	1.264	5.6463e-07	1.507	3.87e-05	1.809	1.2473e-10
O00161	Synaptosomal-associated protein 23 OS=Homo sapiens OX=9606 GN=SNAP23 PE=1 SV=1	SNAP23	23.354	21.229	12.8	2	2	2	1.42	1.755	0.762	0.889	0.745	0.795	1.342	0.988	0.584	0.891	0.735		1.136	0.7702	0.568		0.998		1.906		1.776
O00165	HCLS1-associated protein X-1 OS=Homo sapiens OX=9606 GN=HAX1 PE=1 SV=2	HAX1	31.62	12.195	7.9	2	2	2	0.969	1.017	1.102	0.946	0.757	1.472	1.068	0.919	0.621	1.314	0.422		0.842	0.32844	1.032		0.72		1.28		1.107
O00170	AH receptor-interacting protein OS=Homo sapiens OX=9606 GN=AIP PE=1 SV=2	AIP	37.636	43.665	13.6	4	7	4	1.089	0.915	1.372	0.884	0.775	1.336	0.968	0.968	0.548	1.06	0.41	0.00080009	0.941	0.62852	1.417	0.044278	0.834	0.3655	1.405	0.042476	0.945	0.83562
O00178	GTP-binding protein 1 OS=Homo sapiens OX=9606 GN=GTPBP1 PE=1 SV=3	GTPBP1	72.453	102.56	17	9	13	9	1.106	1.146	0.896	0.919	0.927	1.32	0.805	1.242	0.903	0.962	0.684	0.0044555	0.946	0.6899	1.113	0.5994	0.955	0.52356	1.193	0.150456	0.923	0.79984
O00182	Galectin-9 OS=Homo sapiens OX=9606 GN=LGALS9 PE=1 SV=2	LGALS9	39.518	41.276	9.6	3	3	3	0.876	0.996	1.259	0.862	2.016	0.863	1.069	0.987	0.949	0.987	1.1	0.83722	0.835	0.4184	1.178	0.7599	0.873	0.60574	0.435	0.11292	1.009	0.99174
O00186	Syntaxin-binding protein 3 OS=Homo sapiens OX=9606 GN=STXBP3 PE=1 SV=2	STXBP3	67.764	46.845	10.5	6	9	6	1.084	1.376	0.976	1.098	0.961	0.919	0.921	1.133	0.798	1.019	0.868	0.56398	1.077	0.54458	1.06	0.8329	1.078	0.2954	1.128	0.040524	1.214	0.0161448
O00194	Ras-related protein Rab-27B OS=Homo sapiens OX=9606 GN=RAB27B PE=1 SV=4	RAB27B	24.608	12.012	5	1	2	1	1.206	1.719	0.545	0.982	0.752	0.691	2.269	0.696	0.47	0.698	0.68	0.28656	0.964	0.95694	0.24	0.004056	1.407	0.040917	1.604	0.07098	2.47	0.070222
O00203	AP-3 complex subunit beta-1 OS=Homo sapiens OX=9606 GN=AP3B1 PE=1 SV=3	AP3B1	121.32	59.472	6.9	8	10	8	1.228	1.189	0.764	0.952	0.739	1.445	1.176	0.877	0.615	1.108	0.426	0.0051027	0.888	0.4979	0.65	0.00156091	0.859	0.0029576	1.662	0.000115986	1.356	0.00091771
O00214	Galectin-8 OS=Homo sapiens OX=9606 GN=LGALS8 PE=1 SV=4	LGALS8	35.808	12.67	5.7	2	2	2
O00217	NADH dehydrogenase [ubiquinone] iron-sulfur protein 8, mitochondrial OS=Homo sapiens OX=9606 GN=NDUFS8 PE=1 SV=1	NDUFS8	23.705	17.874	13.8	2	3	2	0.847	0.697	1.346	1	0.6	1.325	1.514	0.846	0.691	1.312	0.522	0.073003	0.818	0.42816	0.889	0.20852	0.762	0.186297	1.412	0.0061751	0.824	0.27952
O00231	26S proteasome non-ATPase regulatory subunit 11 OS=Homo sapiens OX=9606 GN=PSMD11 PE=1 SV=3	PSMD11	47.463	145.38	33.2	13	29	13	0.798	0.891	1.044	1.157	1.069	1.206	1.055	1.059	1.115	1.032	0.925	0.4316	0.923	0.27782	0.99	0.32198	1.121	0.29046	0.746	0.00104036	0.841	0.025063
O00232	26S proteasome non-ATPase regulatory subunit 12 OS=Homo sapiens OX=9606 GN=PSMD12 PE=1 SV=3	PSMD12	52.904	323.31	27	15	33	15	0.857	1.118	0.915	1.063	1.21	1.103	1.073	1.159	1.112	0.951	1.008	0.25998	0.922	0.25086	0.853	0.00138018	1.118	0.0025574	0.708	3.4663e-06	0.965	0.077402
O00233	26S proteasome non-ATPase regulatory subunit 9 OS=Homo sapiens OX=9606 GN=PSMD9 PE=1 SV=3	PSMD9	24.682	191.69	45.3	11	30	11	0.927	1.001	1.178	0.941	1.524	0.623	0.812	1.328	1.576	1.045	2.53	3.3645e-09	1.055	0.67356	1.451	6.275e-07	0.9	0.61678	0.608	8.80762e-12	0.754	0.002762
O00264	Membrane-associated progesterone receptor component 1 OS=Homo sapiens OX=9606 GN=PGRMC1 PE=1 SV=3	PGRMC1	21.671	51.861	20.5	4	6	3	1.153	1.547	0.864	0.907	0.712	1.375	1.17	0.832	0.729	0.847	0.53	0.047399	1.053	0.8003	0.738	0.021585	1.071	0.66196	1.619	0.0181967	1.859	0.00094083
O00267	Transcription elongation factor SPT5 OS=Homo sapiens OX=9606 GN=SUPT5H PE=1 SV=1	SUPT5H	121	11.372	1.9	2	2	2
O00273	DNA fragmentation factor subunit alpha OS=Homo sapiens OX=9606 GN=DFFA PE=1 SV=1	DFFA	36.521	11.752	5.7	2	2	2	1.006	1.055	1.583	0.969	0.546	0.896	0.753	1.313	0.889	1.424	0.992	0.99736	1.116	0.48714	2.102	0.029796	0.68	0.180818	1.842	0.0509	0.804	0.46468
O00299	Chloride intracellular channel protein 1 OS=Homo sapiens OX=9606 GN=CLIC1 PE=1 SV=4	CLIC1	26.922	188.77	48.5	10	25	10	1.044	1.31	1.27	1.106	1.088	0.817	0.904	1.019	1.263	0.907	1.546	2.9968e-08	1.266	0.0076841	1.405	0.000124416	1.219	9.6379e-05	0.96	0.74226	1.286	2.2844e-07
O00303	Eukaryotic translation initiation factor 3 subunit F OS=Homo sapiens OX=9606 GN=EIF3F PE=1 SV=1	EIF3F	37.563	29.952	11.8	4	6	4	1.179	1.302	0.886	0.931	0.612	1.486	0.912	0.829	0.425	1.101	0.286	0.0025613	0.956	0.78822	0.971	0.41118	0.846	0.169123	1.926	0.023655	1.571	0.072899
O00329	Phosphatidylinositol 4,5-bisphosphate 3-kinase catalytic subunit delta isoform OS=Homo sapiens OX=9606 GN=PIK3CD PE=1 SV=2	PIK3CD	119.48	13.865	2.6	2	2	2	1.245	2.135	0.584	1.185	1.11	0.642	1.004	0.985	0.417	1.023	0.65		1.168	0.96872	0.582		1.158		1.122		2.168
O00330	Pyruvate dehydrogenase protein X component, mitochondrial OS=Homo sapiens OX=9606 GN=PDHX PE=1 SV=3	PDHX	54.122	16.859	5	3	3	3	1.483	0.92	0.704	0.92	1.144	1.173	1.766	0.614	0.651	0.857	0.555		0.842	0.51548	0.399		1.074		1.296		1.498
O00391	Sulfhydryl oxidase 1 OS=Homo sapiens OX=9606 GN=QSOX1 PE=1 SV=3	QSOX1	82.577	38.103	7	5	6	5	0.928	1.781	0.785	1.303	0.804	1.034	1.109	0.882	0.978	0.832	0.946	0.5683	1.239	0.2892	0.708	0.055536	1.566	0.043685	1.154	0.23288	2.019	0.00088027
O00399	Dynactin subunit 6 OS=Homo sapiens OX=9606 GN=DCTN6 PE=1 SV=1	DCTN6	20.747	24.095	14.7	2	4	2	0.917	0.966	0.977	1.234	1.102	0.855	1.185	1.248	1.053	0.871	1.232	0.053416	0.978	0.87518	0.824	0.0156384	1.417	0.0109757	0.832	0.088964	0.774	0.050139
O00400	Acetyl-coenzyme A transporter 1 OS=Homo sapiens OX=9606 GN=SLC33A1 PE=1 SV=1	SLC33A1	60.908	37.771	6.9	4	4	4	1.06	0.771	0.964	0.621	0.401	2.189	1.206	0.782	0.596	1.129	0.272	0.0036177	0.703	0.46236	0.799	0.069263	0.55	0.028863	2.643	0.0032388	0.986	0.99426
O00410	Importin-5 OS=Homo sapiens OX=9606 GN=IPO5 PE=1 SV=4	IPO5	123.63	219.97	19.2	20	30	19	1.016	1.143	0.888	1.012	1.109	1.272	0.856	1.002	1.153	1.096	0.906	0.198643	0.977	0.81626	1.037	0.63454	0.923	0.27426	0.916	0.017105	1.141	0.084963
O00418	Eukaryotic elongation factor 2 kinase OS=Homo sapiens OX=9606 GN=EEF2K PE=1 SV=2	EEF2K	82.143	10.718	2.2	2	2	2
O00422	Histone deacetylase complex subunit SAP18 OS=Homo sapiens OX=9606 GN=SAP18 PE=1 SV=1	SAP18	17.561	6.0035	7.8	1	2	1	0.86	0.658	0.404	1.811	1.129	1.392	1.869	0.67	0.916	0.6	0.658	0.045725	0.821	0.50542	0.216	0.00145712	3.018	0.00024229	0.762	0.088239	0.982	0.92816
O00429	Dynamin-1-like protein OS=Homo sapiens OX=9606 GN=DNM1L PE=1 SV=2	DNM1L	81.876	83.036	12.5	9	9	9	1.238	1.36	1.069	0.936	0.745	0.909	1.159	1.029	0.558	1.237	0.614	0.037875	1.016	0.9479	0.922	0.4051	0.757	4.2982e-05	1.662	0.0104618	1.322	0.00167521
O00442	RNA 3'-terminal phosphate cyclase OS=Homo sapiens OX=9606 GN=RTCA PE=1 SV=1	RTCA	39.336	24.912	7.4	3	4	3	0.823	0.573	1.588	0.805	1.471	0.93	0.963	1.137	1.845	0.908	1.984	0.183724	1.042	0.8706	1.649	0.179897	0.887	0.122025	0.559	0.09582	0.504	0.117699
O00461	Golgi integral membrane protein 4 OS=Homo sapiens OX=9606 GN=GOLIM4 PE=1 SV=1	GOLIM4	81.879	10.14	1.6	1	1	1	0.467		1.609	0.721	0.158	3.077	1.124	0.232	0.331	0.69	0.108		0.74	0.9347	1.431		1.045		2.956
O00462	Beta-mannosidase OS=Homo sapiens OX=9606 GN=MANBA PE=2 SV=3	MANBA	100.89	5.9465	1.1	1	1	1
O00471	Exocyst complex component 5 OS=Homo sapiens OX=9606 GN=EXOC5 PE=1 SV=1	EXOC5	81.852	20.152	4	3	3	3	1.323	1.349	0.783	1.09	0.668	1.322	0.785	1.048	0.588	0.928	0.445	0.00117588	1.08	0.78238	0.997	0.60874	1.175	0.8619	1.981	0.033265	1.287	0.054256
O00479	High mobility group nucleosome-binding domain-containing protein 4 OS=Homo sapiens OX=9606 GN=HMGN4 PE=1 SV=3	HMGN4	9.5388	7.4023	10	1	1	1	0.857	0.321	0.803	1.448	0.506	2.566	1.76	0.363	0.609	0.416	0.237		0.72	0.81458	0.456		3.481		1.694		0.884
O00481	Butyrophilin subfamily 3 member A1 OS=Homo sapiens OX=9606 GN=BTN3A1 PE=1 SV=3	BTN3A1	57.677	7.5549	2.3	1	1	1	1.171	1.605	1.026	1.178	0.568	1.108	1.023	0.766	0.521	1.157	0.47		1.19	0.54318	1.003		1.018		2.062		2.095
O00483	Cytochrome c oxidase subunit NDUFA4 OS=Homo sapiens OX=9606 GN=NDUFA4 PE=1 SV=1	NDUFA4	9.3697	27.366	34.6	3	7	3	1.065	0.947	0.986	1.246	0.675	1.513	1.424	0.799	0.441	0.927	0.291	0.0133365	0.878	0.58824	0.692	0.0112777	1.344	0.51652	1.578	0.010282	1.185	0.22444
O00487	26S proteasome non-ATPase regulatory subunit 14 OS=Homo sapiens OX=9606 GN=PSMD14 PE=1 SV=1	PSMD14	34.577	101.5	21.3	6	19	6	0.873	0.978	0.98	1.169	1.151	1.021	1.082	1.045	1.206	0.914	1.181	0.173643	0.999	0.93706	0.906	0.080822	1.279	0.0135751	0.758	0.00017795	0.936	0.906
O00488	Zinc finger protein 593 OS=Homo sapiens OX=9606 GN=ZNF593 PE=1 SV=2	ZNF593	15.199	5.9434	10.4	1	1	1
O00499	Myc box-dependent-interacting protein 1 OS=Homo sapiens OX=9606 GN=BIN1 PE=1 SV=1	BIN1	64.699	8.6062	4.7	2	3	1
O00560	Syntenin-1 OS=Homo sapiens OX=9606 GN=SDCBP PE=1 SV=1	SDCBP	32.444	13.601	7	2	2	2	1.163	1.84	0.734	1.137	0.842	0.851	0.904	0.992	0.917	1.035	1.078	0.66274	1.252	0.31768	0.812	0.58556	1.099	0.64368	1.381	0.25502	1.855	0.12274
O00567	Nucleolar protein 56 OS=Homo sapiens OX=9606 GN=NOP56 PE=1 SV=4	NOP56	66.049	13.251	3	2	3	2	0.836	1.06	0.625	0.664	0.742	2.275	1.605	0.656	0.434	0.828	0.191	0.0049417	0.593	0.157063	0.389	0.051855	0.802	0.2443	1.127	0.51904	1.616	0.0067573
O00571	ATP-dependent RNA helicase DDX3X OS=Homo sapiens OX=9606 GN=DDX3X PE=1 SV=3	DDX3X	73.243	70.977	12.2	8	17	2	1.222	1.359	0.96	0.935	0.51	1.26	0.745	1.103	0.529	1.534	0.42	0.0083806	0.971	0.98378	1.289	0.000138678	0.61	0.049297	2.396	1.93566e-05	1.232	0.31016
O00584	Ribonuclease T2 OS=Homo sapiens OX=9606 GN=RNASET2 PE=1 SV=2	RNASET2	29.48	14.835	9	2	2	2	1.549	1.059	0.806	1.083	0.575	0.971	1.015	1.37	0.496	1.257	0.511		0.962	0.79974	0.794		0.862		2.694		0.773
O00602	Ficolin-1 OS=Homo sapiens OX=9606 GN=FCN1 PE=1 SV=2	FCN1	35.078	81.345	17.8	5	13	5	1.372	1.153	0.518	2.231	0.95	0.675	0.921	0.948	0.629	0.658	0.932	0.91158	1.422	0.45946	0.562	4.4596e-05	3.391	7.0119e-07	1.444	0.062959	1.216	0.0170037
O00629	Importin subunit alpha-3 OS=Homo sapiens OX=9606 GN=KPNA4 PE=1 SV=1	KPNA4	57.886	36.984	6	3	4	2	1.052	0.876	1.108	1.32	1.209	0.985	0.944	0.862	1.663	0.829	1.688	0.116044	1.246	0.145176	1.174	0.35554	1.592	0.124363	0.87	0.51734	1.016	0.99698
O00743	Serine/threonine-protein phosphatase 6 catalytic subunit OS=Homo sapiens OX=9606 GN=PPP6C PE=1 SV=1	PPP6C	35.144	58.974	19.3	6	9	6	0.945	1.027	1.128	1.033	1.331	0.879	0.855	1.226	1.431	1.035	1.628	3.4988e-08	1.045	0.67888	1.319	0.00079864	0.998	0.8944	0.71	1.4175e-07	0.838	0.045785
O00754	Lysosomal alpha-mannosidase OS=Homo sapiens OX=9606 GN=MAN2B1 PE=1 SV=3	MAN2B1	113.74	40.355	5.1	5	6	5	1.597	1.141	0.647	0.609	0.678	1.376	0.742	1.759	0.563	0.895	0.409	0.29852	0.836	0.49088	0.872	0.89264	0.68	0.024123	2.355	0.00039749	0.649	0.184103
O00757	Fructose-1,6-bisphosphatase isozyme 2 OS=Homo sapiens OX=9606 GN=FBP2 PE=1 SV=2	FBP2	36.743	13.859	6.2	2	2	1
O00764	Pyridoxal kinase OS=Homo sapiens OX=9606 GN=PDXK PE=1 SV=1	PDXK	35.102	45.448	12.5	5	9	5	1.699	1.725	1.028	1.181	0.718	0.61	0.56	1.163	0.599	1.043	0.982	0.73142	1.522	0.142977	1.836	0.00188005	1.132	0.0082608	2.366	5.0681e-07	1.483	0.0020957
O14526	F-BAR domain only protein 1 OS=Homo sapiens OX=9606 GN=FCHO1 PE=1 SV=2	FCHO1	96.86	11.774	2.1	2	2	2
O14545	TRAF-type zinc finger domain-containing protein 1 OS=Homo sapiens OX=9606 GN=TRAFD1 PE=1 SV=1	TRAFD1	64.84	7.2802	1.9	1	2	1
O14548	Cytochrome c oxidase subunit 7A-related protein, mitochondrial OS=Homo sapiens OX=9606 GN=COX7A2L PE=1 SV=2	COX7A2L	12.615	25.986	34.2	4	6	4	1.236	1.454	0.575	1.027	0.661	1.104	1.586	0.814	0.544	1.076	0.493		0.923	0.66362	0.363		0.954		1.87		1.786
O14579	Coatomer subunit epsilon OS=Homo sapiens OX=9606 GN=COPE PE=1 SV=3	COPE	34.482	64.311	22.4	6	6	6	1.339	0.876	1.004	0.974	0.939	1.294	1.129	0.882	1.004	0.931	0.776	0.38238	1.004	0.96604	0.889	0.30868	1.046	0.79546	1.426	0.104278	0.993	0.92736
O14602	Eukaryotic translation initiation factor 1A, Y-chromosomal OS=Homo sapiens OX=9606 GN=EIF1AY PE=1 SV=4	EIF1AY	16.442	37.503	28.5	4	9	1	1.139	0.857	2.159	0.937	1.304	1.783	0.135	0.293	1.633	0.287	0.916	0.042225	1.769	0.102643	15.993	0.000120614	3.265	0.0028812	0.873	0.078661	2.925	0.0105215
O14617	AP-3 complex subunit delta-1 OS=Homo sapiens OX=9606 GN=AP3D1 PE=1 SV=1	AP3D1	130.16	64.533	4.3	4	6	4	1.182	1.225	0.763	0.822	0.858	1.402	0.943	0.932	0.533	1.282	0.38	0.0021046	0.835	0.29	0.809	0.26356	0.641	0.0022428	1.378	0.030939	1.314	0.09382
O14618	Copper chaperone for superoxide dismutase OS=Homo sapiens OX=9606 GN=CCS PE=1 SV=1	CCS	29.04	24.574	9.9	4	5	4	0.886	0.618	1.598	1.012	1.431	0.612	0.659	1.426	1.806	0.804	2.951	0.00023606	1.2	0.53116	2.425	0.00111641	1.259	0.27968	0.619	0.079159	0.433	0.0020988
O14656	Torsin-1A OS=Homo sapiens OX=9606 GN=TOR1A PE=1 SV=1	TOR1A	37.808	27.588	10.5	3	4	3	1.277	1.748	0.825	0.995	0.922	0.671	1.147	1.023	0.776	1.096	1.156	0.47494	1.157	0.53168	0.719	0.049941	0.908	0.161559	1.385	0.137501	1.709	0.0070192
O14672	Disintegrin and metalloproteinase domain-containing protein 10 OS=Homo sapiens OX=9606 GN=ADAM10 PE=1 SV=1	ADAM10	84.141	53.343	6.7	4	4	4	1.329	1.268	0.769	0.779	0.835	1.05	1.287	0.951	0.76	1.214	0.724	0.152323	0.919	0.5024	0.598	0.00159529	0.642	0.0078224	1.592	0.00157888	1.333	0.0021237
O14727	Apoptotic protease-activating factor 1 OS=Homo sapiens OX=9606 GN=APAF1 PE=1 SV=2	APAF1	141.84	42.969	4.6	5	5	5	1.126	1.673	0.645	1.095	0.82	0.88	0.958	1.227	0.86	1.119	0.977	0.8827	1.079	0.83588	0.673	0.00071965	0.979	0.33846	1.373	0.0030016	1.363	0.000103234
O14730	Serine/threonine-protein kinase RIO3 OS=Homo sapiens OX=9606 GN=RIOK3 PE=1 SV=2	RIOK3	59.092	7.6711	2.7	1	1	1	1.729	1.549	0.696	0.972	0.653	1.07	0.73	1.128	0.57	1.069	0.533		1.186	0.68284	0.953		0.909		2.648		1.373
O14734	Acyl-coenzyme A thioesterase 8 OS=Homo sapiens OX=9606 GN=ACOT8 PE=1 SV=1	ACOT8	35.914	6.6231	2.8	1	1	1	0.857	0.764	0.897	1.034	0.533	1.978	1.094	0.878	0.767	1.235	0.388		0.755	0.42338	0.82		0.837		1.608		0.87
O14735	CDP-diacylglycerol--inositol 3-phosphatidyltransferase OS=Homo sapiens OX=9606 GN=CDIPT PE=1 SV=1	CDIPT	23.539	8.3203	4.7	1	1	1
O14737	Programmed cell death protein 5 OS=Homo sapiens OX=9606 GN=PDCD5 PE=1 SV=3	PDCD5	14.285	14.853	19.2	2	3	2	1.057	0.711	1.261	1.013	1.719	0.818	0.661	1.117	2.119	0.795	2.59		1.206	0.48232	1.908		1.274		0.615		0.637
O14744	Protein arginine N-methyltransferase 5 OS=Homo sapiens OX=9606 GN=PRMT5 PE=1 SV=4	PRMT5	72.683	165.61	24.8	13	22	13	0.764	0.788	1.219	1.143	1.627	0.751	0.964	1.127	1.593	0.984	2.121	2.0787e-11	1.01	0.98132	1.265	0.00032121	1.162	0.0007811	0.47	5.32907e-15	0.699	0.000123228
O14745	Na(+)/H(+) exchange regulatory cofactor NHE-RF1 OS=Homo sapiens OX=9606 GN=SLC9A3R1 PE=1 SV=4	SLC9A3R1	38.868	68.118	27.9	9	13	9	1.271	1.195	1.238	0.857	0.768	0.844	0.78	1.556	0.573	1.337	0.679	0.062564	0.971	0.90566	1.587	1.76271e-05	0.641	0.0145975	1.655	3.6165e-05	0.768	0.0029045
O14773	Tripeptidyl-peptidase 1 OS=Homo sapiens OX=9606 GN=TPP1 PE=1 SV=2	TPP1	61.247	50.178	4.3	2	6	2	1.023	1.987	0.502	0.981	0.612	1.848	0.502	1.02	0.456	1.295	0.247	8.146e-05	0.938	0.7894	1	0.54894	0.758	0.0024643	1.672	0.075843	1.948	0.00026007
O14776	Transcription elongation regulator 1 OS=Homo sapiens OX=9606 GN=TCERG1 PE=1 SV=2	TCERG1	123.9	55.657	7.6	8	10	8	0.912	0.803	1.004	0.971	0.744	2.052	1.198	0.663	0.721	0.835	0.351	0.0023184	0.803	0.56126	0.838	0.0093844	1.163	0.21844	1.226	0.095335	1.211	0.3256
O14787	Transportin-2 OS=Homo sapiens OX=9606 GN=TNPO2 PE=1 SV=3	TNPO2	101.39	17.701	5.5	5	7	2	1.418	1.105	0.791	0.83	0.306	1.862	0.816	0.97	0.66	1.147	0.354		0.942	0.87168	0.969		0.724		4.634		1.139
O14791	Apolipoprotein L1 OS=Homo sapiens OX=9606 GN=APOL1 PE=1 SV=5	APOL1	43.974	7.7744	2.8	1	1	1
O14802	DNA-directed RNA polymerase III subunit RPC1 OS=Homo sapiens OX=9606 GN=POLR3A PE=1 SV=2	POLR3A	155.64	7.1898	1	1	1	1
O14818	Proteasome subunit alpha type-7 OS=Homo sapiens OX=9606 GN=PSMA7 PE=1 SV=1	PSMA7	27.887	163.55	52.8	12	28	12	0.791	0.908	1.13	1.186	1.382	0.922	1.182	0.894	1.682	0.844	1.824	6.71685e-14	1.091	0.66916	0.956	0.124257	1.405	0.00195554	0.572	1.62814e-12	1.016	0.61964
O14828	Secretory carrier-associated membrane protein 3 OS=Homo sapiens OX=9606 GN=SCAMP3 PE=1 SV=3	SCAMP3	38.287	49.266	8.4	2	4	2	1.049	0.863	1.061	0.736	0.842	1.777	0.965	0.745	0.872	1.329	0.491	0.32422	0.81	0.35864	1.099	0.6266	0.554	0.0707	1.246	0.6008	1.158	0.67194
O14841	5-oxoprolinase OS=Homo sapiens OX=9606 GN=OPLAH PE=1 SV=3	OPLAH	137.46	10.68	1.4	2	2	2	1.115	1.156	0.681	0.842	0.847	1.162	1.037	1.432	0.802	1.26	0.69		0.801	0.131005	0.657		0.668		1.316		0.807
O14879	Interferon-induced protein with tetratricopeptide repeats 3 OS=Homo sapiens OX=9606 GN=IFIT3 PE=1 SV=1	IFIT3	55.984	47.07	7.6	3	3	3	0.92	0.802	1.401	0.679	2.602	0.494	1.619	0.812	0.857	0.847	1.735	0.160401	0.731	0.59672	0.865	0.06756	0.802	0.063643	0.354	0.00106358	0.988	0.6366
O14920	Inhibitor of nuclear factor kappa-B kinase subunit beta OS=Homo sapiens OX=9606 GN=IKBKB PE=1 SV=1	IKBKB	86.563	11.15	2.2	2	2	2
O14925	Mitochondrial import inner membrane translocase subunit Tim23 OS=Homo sapiens OX=9606 GN=TIMM23 PE=1 SV=1	TIMM23	21.943	6.4572	5.3	1	1	1	1.08	1.195	0.923	0.794	0.826	1.478	1.324	0.659	0.668	1.201	0.452		0.849	0.4665	0.697		0.661		1.308		1.813
O14929	Histone acetyltransferase type B catalytic subunit OS=Homo sapiens OX=9606 GN=HAT1 PE=1 SV=1	HAT1	49.512	19.695	5.5	2	2	2	1.428	1.669	0.801	0.982	0.615	1.027	0.897	0.926	0.522	1.303	0.508	0.0096172	1.133	0.77308	0.893	0.57012	0.754	0.098264	2.322	0.044081	1.802	0.0051616
O14949	Cytochrome b-c1 complex subunit 8 OS=Homo sapiens OX=9606 GN=UQCRQ PE=1 SV=4	UQCRQ	9.9062	16.584	12.2	2	4	2	1.115	1.075	0.538	0.948	0.599	1.727	1.939	0.716	0.453	0.928	0.262	0.00132335	0.699	0.32572	0.277	0.00063635	1.022	0.98184	1.861	0.053704	1.501	0.0018757
O14964	Hepatocyte growth factor-regulated tyrosine kinase substrate OS=Homo sapiens OX=9606 GN=HGS PE=1 SV=1	HGS	86.191	97.625	12	10	16	10	0.834	0.886	1.396	0.869	1.217	0.809	0.902	1.213	1.874	0.995	2.316	2.443e-10	1.141	0.63148	1.548	3.0802e-07	0.873	0.2932	0.685	4.2402e-10	0.73	0.0038647
O14972	Down syndrome critical region protein 3 OS=Homo sapiens OX=9606 GN=DSCR3 PE=2 SV=1	DSCR3	33.01	36.975	12.1	3	4	3	1.124	1.616	0.739	0.88	0.939	1.127	0.925	1.217	0.68	1.074	0.603	0.111342	0.954	0.5888	0.799	0.0098023	0.819	0.166736	1.197	0.166501	1.328	0.024057
O14974	Protein phosphatase 1 regulatory subunit 12A OS=Homo sapiens OX=9606 GN=PPP1R12A PE=1 SV=1	PPP1R12A	115.28	13.954	1.9	2	2	2	1.201	1.101	1.245	0.997	0.585	1.795	0.903	0.755	0.594	0.777	0.331		1.067	0.64144	1.379		1.283		2.053		1.458
O14975	Very long-chain acyl-CoA synthetase OS=Homo sapiens OX=9606 GN=SLC27A2 PE=1 SV=2	SLC27A2	70.311	13.376	4	2	2	2	1.504	1.327	0.564	0.924	0.761	1.284	1.039	0.952	0.719	1.119	0.56		0.977	0.7258	0.543		0.826		1.976		1.394
O14976	Cyclin-G-associated kinase OS=Homo sapiens OX=9606 GN=GAK PE=1 SV=2	GAK	143.19	58.298	6.9	8	9	8	0.962	1.237	0.933	1.03	1.207	1.032	0.974	1.044	0.914	1.12	0.886	0.64578	0.944	0.38256	0.958	0.35946	0.92	0.143342	0.797	0.031059	1.185	0.04604
O14979	Heterogeneous nuclear ribonucleoprotein D-like OS=Homo sapiens OX=9606 GN=HNRNPDL PE=1 SV=3	HNRNPDL	46.437	67.495	11.4	4	4	4	0.79	0.668	1.3	0.798	0.551	2.665	1.096	0.55	0.431	0.809	0.162	0.0036417	0.703	0.53392	1.186	0.093245	0.986	0.88694	1.434	0.047657	1.215	0.45766
O14980	Exportin-1 OS=Homo sapiens OX=9606 GN=XPO1 PE=1 SV=1	XPO1	123.38	214.75	19.4	19	33	19	0.909	1.051	1.068	1.099	1.204	0.945	0.921	1.214	1.267	0.929	1.341	4.5013e-07	1.035	0.66934	1.16	0.00038133	1.183	0.000183026	0.755	1.8473e-09	0.866	0.0068785
O15020	Spectrin beta chain, non-erythrocytic 2 OS=Homo sapiens OX=9606 GN=SPTBN2 PE=1 SV=3	SPTBN2	271.32	28.506	5.2	11	37	4	1.281	0.728	1.259	0.979	1	1.013	1.388	0.706	0.43	1.545	0.424	0.017417	0.827	0.38414	0.907	0.65314	0.634	0.0029952	1.281	0.059736	1.031	0.9721
O15027	Protein transport protein Sec16A OS=Homo sapiens OX=9606 GN=SEC16A PE=1 SV=3	SEC16A	233.51	26.962	1.5	4	4	4	1.11	0.923	1.51	0.878	0.753	0.892	1.277	1.027	0.698	1.276	0.783		0.98	0.84156	1.182		0.688		1.474		0.899
O15031	Plexin-B2 OS=Homo sapiens OX=9606 GN=PLXNB2 PE=1 SV=3	PLXNB2	205.12	11.4	0.9	2	2	2
O15066	Kinesin-like protein KIF3B OS=Homo sapiens OX=9606 GN=KIF3B PE=1 SV=1	KIF3B	85.124	13.055	2.7	2	2	2	1.199	0.863	0.753	0.703	0.72	2.287	1.118	0.778	0.552	0.854	0.241		0.707	0.28882	0.674		0.823		1.665		1.109
O15067	Phosphoribosylformylglycinamidine synthase OS=Homo sapiens OX=9606 GN=PFAS PE=1 SV=4	PFAS	144.73	323.31	17.4	19	45	19	0.999	1.102	1.005	1.084	1.386	0.766	0.824	1.144	1.267	1.03	1.654	4.4836e-09	1.06	0.52356	1.22	0.00029926	1.052	0.64738	0.721	9.9165e-07	0.963	0.170361
O15075	Serine/threonine-protein kinase DCLK1 OS=Homo sapiens OX=9606 GN=DCLK1 PE=1 SV=2	DCLK1	82.223	7.9609	1.5	1	1	1	3.595	0.834	0.614	0.546	1.21	0.614	0.66	0.582	0.545	1.255	0.888		1.42	0.8358	0.93		0.435		2.971		1.433
O15084	Serine/threonine-protein phosphatase 6 regulatory ankyrin repeat subunit A OS=Homo sapiens OX=9606 GN=ANKRD28 PE=1 SV=5	ANKRD28	112.96	65.372	7	6	6	5	0.839	0.897	1.352	0.882	1.327	0.908	0.993	1.068	1.746	1.108	1.923	0.0179174	1.058	0.9011	1.362	0.32008	0.796	0.0607	0.632	0.111135	0.84	0.104601
O15126	Secretory carrier-associated membrane protein 1 OS=Homo sapiens OX=9606 GN=SCAMP1 PE=1 SV=2	SCAMP1	37.92	-2	3	1	1	1
O15127	Secretory carrier-associated membrane protein 2 OS=Homo sapiens OX=9606 GN=SCAMP2 PE=1 SV=2	SCAMP2	36.648	6.112	4	1	1	1	0.943	1.049	1.161	1.109	1.868	0.813	1.06	0.8	1.421	0.759	1.748		1.072	0.51496	1.095		1.461		0.505		1.311
O15143	Actin-related protein 2/3 complex subunit 1B OS=Homo sapiens OX=9606 GN=ARPC1B PE=1 SV=3	ARPC1B	40.949	140.85	28.8	9	16	9	1.112	1.72	0.765	1.172	0.717	1.02	0.908	0.885	0.734	1.051	0.72	0.00174499	1.201	0.4269	0.843	0.033459	1.115	0.63214	1.551	0.0147239	1.944	0.00037753
O15144	Actin-related protein 2/3 complex subunit 2 OS=Homo sapiens OX=9606 GN=ARPC2 PE=1 SV=1	ARPC2	34.333	104.27	34.7	11	25	11	1.203	1.97	0.662	1.087	0.768	0.829	0.824	1.172	0.627	1.057	0.756	9.5058e-05	1.193	0.67114	0.803	0.00103828	1.028	0.39016	1.566	2.0202e-09	1.681	3.7085e-11
O15145	Actin-related protein 2/3 complex subunit 3 OS=Homo sapiens OX=9606 GN=ARPC3 PE=1 SV=3	ARPC3	20.546	23.27	19.7	3	7	3	1.181	1.911	0.611	1.141	0.658	0.873	0.919	1.198	0.417	1.186	0.478	0.00033591	1.088	0.92874	0.665	0.0080249	0.962	0.84736	1.795	0.00114435	1.595	0.00087945
O15151	Protein Mdm4 OS=Homo sapiens OX=9606 GN=MDM4 PE=1 SV=2	MDM4	54.864	6.5006	3.1	1	1	1	1.161	1.458	0.386	1.54	1.131	1.296	1.028	0.951	0.425	0.82	0.328		0.951	0.55408	0.375		1.878		1.027		1.533
O15160	DNA-directed RNA polymerases I and III subunit RPAC1 OS=Homo sapiens OX=9606 GN=POLR1C PE=1 SV=1	POLR1C	39.249	6.1301	3.8	1	1	1
O15162	Phospholipid scramblase 1 OS=Homo sapiens OX=9606 GN=PLSCR1 PE=1 SV=1	PLSCR1	35.049	19.693	7.2	2	3	2	0.646	0.815	0.97	1.222	2.788	0.741	1.4	0.547	1.138	0.856	1.536	0.0039422	0.757	0.68568	0.693	0.009621	1.428	0.0114046	0.232	3.8718e-05	1.49	0.0182243
O15173	Membrane-associated progesterone receptor component 2 OS=Homo sapiens OX=9606 GN=PGRMC2 PE=1 SV=1	PGRMC2	23.818	68.904	20.2	5	6	4	1.306	0.781	1.2	0.737	0.441	1.382	0.864	1.149	0.76	1.17	0.55	0.37108	0.956	0.97908	1.389	0.025697	0.63	0.26496	2.961		0.68	0.187322
O15211	Ral guanine nucleotide dissociation stimulator-like 2 OS=Homo sapiens OX=9606 GN=RGL2 PE=1 SV=1	RGL2	83.548	6.5524	1.5	1	1	1	1.278	1.19	0.969	1.022	1.102	1.078	1.003	0.892	0.951	0.988	0.882		1.069	0.39734	0.966		1.034		1.16		1.334
O15212	Prefoldin subunit 6 OS=Homo sapiens OX=9606 GN=PFDN6 PE=1 SV=1	PFDN6	14.582	48.753	31.8	4	6	4	0.95	1.229	1.153	1.219	1.115	1.013	0.859	1.111	0.971	0.946	0.959	0.35188	1.095	0.26568	1.342	0.00122446	1.289	0.030424	0.852	0.0168559	1.106	0.181584
O15226	NF-kappa-B-repressing factor OS=Homo sapiens OX=9606 GN=NKRF PE=1 SV=2	NKRF	77.672	7.1015	1.3	1	2	1	1.054	1.409	0.495	1.395	1.068	1.14	1.163	0.972	0.582	1.016	0.511	0.176621	0.921	0.48636	0.426	0.097177	1.373	0.127841	0.987	0.79906	1.45	0.113976
O15231	Zinc finger protein 185 OS=Homo sapiens OX=9606 GN=ZNF185 PE=1 SV=3	ZNF185	73.525	6.8777	1.7	1	1	1	1.377	1.81	0.574	1.324	0.76	0.959	1.05	0.86	0.539	0.922	0.562		1.236	0.70216	0.547		1.436		1.812		2.105
O15247	Chloride intracellular channel protein 2 OS=Homo sapiens OX=9606 GN=CLIC2 PE=1 SV=3	CLIC2	28.356	159.55	31.2	6	7	6	1.211	0.752	1.312	0.871	1.183	1.157	1.037	1.062	0.972	0.879	0.84	0.104459	0.962	0.65262	1.265	0.0101159	0.991	0.90786	1.024	0.52762	0.708	0.09258
O15258	Protein RER1 OS=Homo sapiens OX=9606 GN=RER1 PE=1 SV=1	RER1	22.958	17.06	9.2	1	1	1	1.085	0.856	1.166	0.852	0.86	1.477	1.257	0.91	0.752	0.983	0.509		0.859	0.30392	0.928		0.867		1.262		0.941
O15264	Mitogen-activated protein kinase 13 OS=Homo sapiens OX=9606 GN=MAPK13 PE=1 SV=1	MAPK13	42.089	12.635	4.4	1	1	1
O15270	Serine palmitoyltransferase 2 OS=Homo sapiens OX=9606 GN=SPTLC2 PE=1 SV=1	SPTLC2	62.924	11.937	2	1	1	1	1.088	2.219	0.596	1.097	0.633	0.868	1.181	0.989	0.483	0.938	0.556		1.19	0.87314	0.505		1.17		1.719		2.244
O15294	UDP-N-acetylglucosamine--peptide N-acetylglucosaminyltransferase 110 kDa subunit OS=Homo sapiens OX=9606 GN=OGT PE=1 SV=3	OGT	116.92	58.862	7.6	8	12	8	1.43	1.735	0.746	0.832	0.606	1.287	0.812	1.007	0.538	1.013	0.418	0.000162865	1.118	0.84712	0.919	0.62472	0.821	0.0034848	2.36	2.363e-07	1.723	5.9463e-09
O15305	Phosphomannomutase 2 OS=Homo sapiens OX=9606 GN=PMM2 PE=1 SV=1	PMM2	28.082	88.265	34.1	9	11	9	0.902	0.617	1.674	0.788	0.939	1.53	0.873	0.877	1.129	1.196	0.738	0.0002414	0.944	0.6586	1.918	1.7177e-09	0.659	5.8199e-05	0.961	0.3322	0.704	0.000175626
O15320	Endoplasmic reticulum export factor CTAGE5 OS=Homo sapiens OX=9606 GN=CTAGE5 PE=1 SV=4	CTAGE5	90.995	28.886	5.2	4	5	4	1.277	1.198	0.653	0.969	0.571	1.919	1.115	0.706	0.576	0.897	0.3	0.056944	0.897	0.80942	0.586	0.082443	1.08	0.034156	2.236	0.043783	1.697	0.007024
O15321	Transmembrane 9 superfamily member 1 OS=Homo sapiens OX=9606 GN=TM9SF1 PE=2 SV=2	TM9SF1	68.86	26.959	8.7	4	4	4	1.601	1.035	1.072	0.84	0.673	1.34	1.182	0.923	0.601	0.786	0.449	0.09726	1.05	0.88842	0.907	0.6254	1.069	0.86374	2.379	0.062297	1.121	0.74562
O15347	High mobility group protein B3 OS=Homo sapiens OX=9606 GN=HMGB3 PE=1 SV=4	HMGB3	22.98	40.678	13.5	2	3	2	0.691	0.889	0.521	0.979	0.405	3.636	0.58	0.496	0.595	0.899	0.164	0.00057749	0.611	0.74564	0.898	0.73976	1.089	0.76064	1.706	0.127802	1.792	0.012944
O15354	Prosaposin receptor GPR37 OS=Homo sapiens OX=9606 GN=GPR37 PE=1 SV=2	GPR37	67.113	-2	2.3	1	1	1	0.684	1.346	0.96	1.436	1.426	0.38	0.743	0.692	2	1.701	5.263		1.3	0.33366	1.292		0.844		0.48		1.945
O15355	Protein phosphatase 1G OS=Homo sapiens OX=9606 GN=PPM1G PE=1 SV=1	PPM1G	59.271	41.021	11.5	6	6	6	1.292	1.169	0.866	0.849	0.616	1.435	1.206	1.038	0.358	0.953	0.249	0.028417	0.864	0.4858	0.718	0.09832	0.891	0.29536	2.097	0.0332	1.126	0.0193047
O15371	Eukaryotic translation initiation factor 3 subunit D OS=Homo sapiens OX=9606 GN=EIF3D PE=1 SV=1	EIF3D	63.972	56.172	11.1	6	8	6	1.153	1.339	0.987	0.96	0.449	1.79	0.829	0.871	0.403	1.154	0.225	0.0025587	0.951	0.9361	1.191	0.115277	0.832	0.031483	2.568	0.00158465	1.537	2.1547e-05
O15372	Eukaryotic translation initiation factor 3 subunit H OS=Homo sapiens OX=9606 GN=EIF3H PE=1 SV=1	EIF3H	39.93	196.25	19.6	8	12	8	1.294	1.272	0.777	0.946	0.526	1.573	0.821	0.911	0.362	1.261	0.23	5.9752e-05	0.913	0.70978	0.946	0.031741	0.75	0.00164194	2.46	0.00186343	1.396	0.046703
O15382	Branched-chain-amino-acid aminotransferase, mitochondrial OS=Homo sapiens OX=9606 GN=BCAT2 PE=1 SV=2	BCAT2	44.287	75.275	14	4	6	4	1.176	0.868	0.801	0.726	0.717	1.76	1.67	0.789	0.502	0.876	0.285	0.0040404	0.701	0.21644	0.48	0.00199992	0.829	0.29364	1.64	0.086999	1.1	0.32124
O15389	Sialic acid-binding Ig-like lectin 5 OS=Homo sapiens OX=9606 GN=SIGLEC5 PE=1 SV=1	SIGLEC5	60.714	24.983	5.3	3	3	3	1.445	2.711	0.472	1.634	1.706	0.336	0.46	0.606	1.118	0.341	3.327	0.043517	2.14	0.081884	1.026	0.85648	4.792	0.0065186	0.847	0.118899	4.474	0.0140401
O15391	Transcription factor YY2 OS=Homo sapiens OX=9606 GN=YY2 PE=2 SV=1	YY2	41.347	15.237	5.4	1	1	1
O15400	Syntaxin-7 OS=Homo sapiens OX=9606 GN=STX7 PE=1 SV=4	STX7	29.815	62.26	16.5	4	7	4	0.884	0.856	1.269	0.924	1.107	1.001	0.989	1.177	1.554	1.064	1.552	0.0149559	1.028	0.99428	1.283	0.00153862	0.868	0.033743	0.799	0.00084408	0.727	0.0914
O15427	Monocarboxylate transporter 4 OS=Homo sapiens OX=9606 GN=SLC16A3 PE=1 SV=1	SLC16A3	49.469	12.184	2.8	1	1	1
O15439	Multidrug resistance-associated protein 4 OS=Homo sapiens OX=9606 GN=ABCC4 PE=1 SV=3	ABCC4	149.52	106.88	9.1	12	16	12	0.79	0.905	0.878	1.368	1.37	0.772	1.356	0.993	1.311	1.01	1.698	2.0534e-07	0.955	0.76074	0.647	3.0517e-09	1.354	2.5329e-07	0.577	1.9845e-07	0.911	0.2103
O15440	Multidrug resistance-associated protein 5 OS=Homo sapiens OX=9606 GN=ABCC5 PE=1 SV=2	ABCC5	160.66	6.3323	0.6	1	1	1
O15484	Calpain-5 OS=Homo sapiens OX=9606 GN=CAPN5 PE=1 SV=2	CAPN5	73.168	23.919	5.2	3	3	3	0.759	0.684	0.883	1.223	1.041	1.311	1.207	0.707	1.865	0.963	1.423	0.111843	1.035	0.94876	0.732	0.041738	1.27	0.0020614	0.729	0.137478	0.967	0.47838
O15498	Synaptobrevin homolog YKT6 OS=Homo sapiens OX=9606 GN=YKT6 PE=1 SV=1	YKT6	22.417	12.733	9.6	2	2	2	1.131	1.075	1.042	0.955	1.249	1.058	1.023	0.804	1.254	1.082	1.185	0.51888	1.046	0.56264	1.019	0.023703	0.883	0.184465	0.906	0.79194	1.337	0.2518
O15511	Actin-related protein 2/3 complex subunit 5 OS=Homo sapiens OX=9606 GN=ARPC5 PE=1 SV=3	ARPC5	16.32	119.5	39.1	5	13	4	1.222	1.989	0.716	1.094	0.831	0.767	0.895	1.161	0.696	1.127	0.907	0.29752	1.196	0.60008	0.8	0.0020958	0.971	0.625	1.471	1.79055e-05	1.713	9.8642e-05
O15523	ATP-dependent RNA helicase DDX3Y OS=Homo sapiens OX=9606 GN=DDX3Y PE=1 SV=2	DDX3Y	73.153	6.2317	11.1	7	15	1
O15533	Tapasin OS=Homo sapiens OX=9606 GN=TAPBP PE=1 SV=1	TAPBP	47.625	19.235	4.5	2	8	2	1.039	1.062	1.081	0.857	0.504	1.522	0.966	0.852	0.386	1.091	0.254	0.085163	0.897	0.6869	1.119	0.088663	0.786	0.00126243	2.062	0.00052034	1.246	0.020637
O15553	Pyrin OS=Homo sapiens OX=9606 GN=MEFV PE=1 SV=1	MEFV	86.443	5.8961	1	1	1	1	1.051	1.632	0.98	1.564	0.557	0.779	1.04	0.653	1.139	1.066	1.462		1.555	0.025582	0.942		1.467		1.887		2.499
O15554	Intermediate conductance calcium-activated potassium channel protein 4 OS=Homo sapiens OX=9606 GN=KCNN4 PE=1 SV=1	KCNN4	47.695	18.024	7	3	3	3
O43143	Pre-mRNA-splicing factor ATP-dependent RNA helicase DHX15 OS=Homo sapiens OX=9606 GN=DHX15 PE=1 SV=2	DHX15	90.932	70.46	14	10	14	9	1.014	1.253	0.907	0.939	0.884	1.368	1.137	0.99	0.697	0.983	0.51	0.00080153	0.897	0.3706	0.798	0.0043014	0.955	0.053197	1.147	0.068636	1.266	0.100256
O43148	mRNA cap guanine-N7 methyltransferase OS=Homo sapiens OX=9606 GN=RNMT PE=1 SV=1	RNMT	54.843	6.5345	2.1	1	2	1	1.161	0.745	0.955	0.947	0.623	2.141	1.182	0.617	0.591	0.915	0.276	0.024364	0.803	0.62656	0.808	0.31324	1.035	0.68762	1.864	0.0004819	1.207	0.48578
O43149	Zinc finger ZZ-type and EF-hand domain-containing protein 1 OS=Homo sapiens OX=9606 GN=ZZEF1 PE=1 SV=6	ZZEF1	331.07	173.41	8.3	22	24	22	1.061	1.231	0.766	1.148	1.014	0.995	1.011	1.276	0.777	1.03	0.781	0.0104186	0.936	0.4799	0.758	0.00117574	1.115	0.050944	1.046	0.47918	0.965	0.5494
O43169	Cytochrome b5 type B OS=Homo sapiens OX=9606 GN=CYB5B PE=1 SV=2	CYB5B	16.332	22.788	8.2	1	3	1	1.308	1.659	1.515	0.8	0.633	0.655	1.053	0.927	0.587	1.126	0.896	0.65376	1.336	0.32516	1.439	0.042856	0.71	0.104902	2.066	0.026524	1.79	0.0142781
O43172	U4/U6 small nuclear ribonucleoprotein Prp4 OS=Homo sapiens OX=9606 GN=PRPF4 PE=1 SV=2	PRPF4	58.449	17.792	8.2	3	3	3	0.701	0.852	0.934	1.321	1.927	0.622	1.063	1.197	1.495	1.048	2.404		0.905	0.75296	0.879		1.26		0.364		0.712
O43175	D-3-phosphoglycerate dehydrogenase OS=Homo sapiens OX=9606 GN=PHGDH PE=1 SV=4	PHGDH	56.65	120.73	24.4	11	14	11	0.437	0.662	0.283	1.187	0.393	3.274	0.391	0.656	0.487	1.806	0.149	2.2088e-05	0.469	0.32982	0.724	0.76364	0.657	0.053762	1.112	0.8937	1.009	0.84932
O43181	NADH dehydrogenase [ubiquinone] iron-sulfur protein 4, mitochondrial OS=Homo sapiens OX=9606 GN=NDUFS4 PE=1 SV=1	NDUFS4	20.108	37.61	20	3	9	3	1.15	0.96	0.674	1.262	0.627	1.429	1.401	0.737	0.574	0.839	0.402	3.0889e-07	0.918	0.7565	0.481	2.2059e-11	1.504	0.0065197	1.834	0.00045993	1.303	0.016837
O43237	Cytoplasmic dynein 1 light intermediate chain 2 OS=Homo sapiens OX=9606 GN=DYNC1LI2 PE=1 SV=1	DYNC1LI2	54.099	14.417	7.5	3	3	2	1.369	1.008	1.644	0.827	0.575	1.448	0.818	0.99	0.519	0.831	0.358		1.151	0.67168	2.01		0.995		2.381		1.018
O43242	26S proteasome non-ATPase regulatory subunit 3 OS=Homo sapiens OX=9606 GN=PSMD3 PE=1 SV=2	PSMD3	60.977	323.31	42.3	22	48	22	0.864	0.972	0.95	1.15	1.168	1.109	1.11	1.048	1.22	0.966	1.1	0.0253	0.955	0.48352	0.856	0.00051647	1.19	1.1156e-06	0.74	4.55191e-15	0.927	0.030677
O43252	Bifunctional 3'-phosphoadenosine 5'-phosphosulfate synthase 1 OS=Homo sapiens OX=9606 GN=PAPSS1 PE=1 SV=2	PAPSS1	70.832	68.774	10.3	7	8	7	1.034	1.052	0.957	0.819	0.679	1.935	0.95	0.975	0.595	0.909	0.307	2.9326e-08	0.818	0.4631	1.007	0.42818	0.901	0.076725	1.523	0.00137736	1.079	0.26454
O43264	Centromere/kinetochore protein zw10 homolog OS=Homo sapiens OX=9606 GN=ZW10 PE=1 SV=3	ZW10	88.828	42.539	8.3	6	7	6	1.336	1.194	0.831	0.928	0.779	1.283	1.101	1.047	0.708	1.053	0.552	0.00083939	0.949	0.65246	0.755	0.160559	0.881	0.0023359	1.715	0.03106	1.14	0.090077
O43290	U4/U6.U5 tri-snRNP-associated protein 1 OS=Homo sapiens OX=9606 GN=SART1 PE=1 SV=1	SART1	90.254	25.744	3.1	2	2	2
O43300	Leucine-rich repeat transmembrane neuronal protein 2 OS=Homo sapiens OX=9606 GN=LRRTM2 PE=2 SV=3	LRRTM2	59.076	5.9393	1.7	1	1	1
O43314	Inositol hexakisphosphate and diphosphoinositol-pentakisphosphate kinase 2 OS=Homo sapiens OX=9606 GN=PPIP5K2 PE=1 SV=3	PPIP5K2	140.41	81.295	7.5	8	11	8	1.036	1.27	1.105	1.072	0.971	1.015	0.822	1.031	0.912	1.258	0.899	0.064816	1.058	0.5045	1.344	0.0036239	0.852	0.089376	1.067	0.23636	1.232	0.5108
O43318	Mitogen-activated protein kinase kinase kinase 7 OS=Homo sapiens OX=9606 GN=MAP3K7 PE=1 SV=1	MAP3K7	67.195	9.0168	3.3	1	1	1	1.393	1.438	1.049	1.011	0.705	1.065	0.751	1.083	1.051	0.816	0.987		1.344	0.034118	1.397		1.239		1.976		1.328
O43324	Eukaryotic translation elongation factor 1 epsilon-1 OS=Homo sapiens OX=9606 GN=EEF1E1 PE=1 SV=1	EEF1E1	19.81	30.084	16.1	3	5	3	1.36	1.182	0.85	0.741	0.493	1.566	1.05	0.948	0.363	1.385	0.232	0.0033016	0.826	0.50724	0.81	0.101199	0.535	0.0020595	2.759	0.0024213	1.247	0.070424
O43390	Heterogeneous nuclear ribonucleoprotein R OS=Homo sapiens OX=9606 GN=HNRNPR PE=1 SV=1	HNRNPR	70.942	148.87	26.1	16	28	10	1.035	1.175	1.108	0.889	0.593	1.611	1.188	0.764	0.495	0.854	0.307	1.5498e-06	0.939	0.8545	0.933	0.70238	1.041	0.66856	1.745	0.0021179	1.538	3.1931e-06
O43395	U4/U6 small nuclear ribonucleoprotein Prp3 OS=Homo sapiens OX=9606 GN=PRPF3 PE=1 SV=2	PRPF3	77.528	13.537	2.6	2	2	2	0.872	0.826	1.438	0.777	0.564	2.471	0.938	0.544	0.341	0.937	0.138	0.0120645	0.78	0.63372	1.533	0.37938	0.829	0.46772	1.546	0.3317	1.518	0.32326
O43396	Thioredoxin-like protein 1 OS=Homo sapiens OX=9606 GN=TXNL1 PE=1 SV=3	TXNL1	32.251	170.71	31.1	7	17	7	0.94	0.951	1.117	0.92	1.219	1.21	0.82	1.118	1.467	0.903	1.212	0.0187162	1.024	0.87268	1.362	0.00136425	1.019	0.96834	0.771	0.00082143	0.851	0.100719
O43399	Tumor protein D54 OS=Homo sapiens OX=9606 GN=TPD52L2 PE=1 SV=2	TPD52L2	22.237	25.392	19.4	3	3	3	1.155	0.899	1.257	0.923	1.207	0.948	0.934	1.135	1.076	1.11	1.135	0.6275	0.996	0.9286	1.346	0.47846	0.832	0.64386	0.957	0.76662	0.792	0.3307
O43402	ER membrane protein complex subunit 8 OS=Homo sapiens OX=9606 GN=EMC8 PE=1 SV=1	EMC8	23.773	25.845	15.2	3	3	3	1.186	0.946	1.027	0.814	0.514	1.548	1.602	0.867	0.483	0.896	0.312		0.821	0.56636	0.641		0.908		2.307		1.091
O43426	Synaptojanin-1 OS=Homo sapiens OX=9606 GN=SYNJ1 PE=1 SV=2	SYNJ1	173.1	11.746	1.3	2	2	2	1.092	1.365	0.877	1.133	0.982	0.985	0.976	1.154	1.157	0.789	1.175		1.151	0.177161	0.899		1.436		1.112		1.183
O43447	Peptidyl-prolyl cis-trans isomerase H OS=Homo sapiens OX=9606 GN=PPIH PE=1 SV=1	PPIH	19.208	45.191	34.5	7	11	7	1.026	0.884	1.039	0.843	1.35	1.198	0.986	1.017	1.17	0.982	0.977	0.77038	0.897	0.24924	1.054	0.4321	0.858	0.138322	0.76	0.00191855	0.869	0.179017
O43451	Maltase-glucoamylase, intestinal OS=Homo sapiens OX=9606 GN=MGAM PE=1 SV=5	MGAM	209.85	24.75	2	4	5	4	1.508	1.986	0.715	1.047	1.121	0.604	0.905	0.971	0.686	0.889	1.136	0.66632	1.323	0.38302	0.79	0.33214	1.178	0.36412	1.345	0.3083	2.045	0.111838
O43464	Serine protease HTRA2, mitochondrial OS=Homo sapiens OX=9606 GN=HTRA2 PE=1 SV=2	HTRA2	48.84	12.571	5.5	2	2	2
O43488	Aflatoxin B1 aldehyde reductase member 2 OS=Homo sapiens OX=9606 GN=AKR7A2 PE=1 SV=3	AKR7A2	39.589	90.803	26.2	10	20	10	0.887	1.008	1.608	0.893	1.587	0.579	0.658	1.208	2.017	0.871	3.484	8.0865e-09	1.308	0.29668	2.444	8.4442e-07	1.025	0.8995	0.559	1.88838e-05	0.834	0.023738
O43491	Band 4.1-like protein 2 OS=Homo sapiens OX=9606 GN=EPB41L2 PE=1 SV=1	EPB41L2	112.59	59.738	8.3	7	8	5	1.121	0.972	1.172	0.966	1.168	1.042	1.073	1.001	0.908	1.096	0.871		0.955	0.39616	1.092		0.881		0.96		0.971
O43493	Trans-Golgi network integral membrane protein 2 OS=Homo sapiens OX=9606 GN=TGOLN2 PE=1 SV=3	TGOLN2	51.018	20.978	5.8	3	5	3	1.24	0.855	2.131	0.714	0.635	0.884	0.765	1.271	0.218	1.301	0.247	0.00104113	1.062	0.73656	2.786	1.94487e-05	0.549	0.00033898	1.953	9.5482e-05	0.673	0.0151041
O43504	Ragulator complex protein LAMTOR5 OS=Homo sapiens OX=9606 GN=LAMTOR5 PE=1 SV=1	LAMTOR5	9.6138	25.379	22	1	2	1	0.865	1.653	0.735	1.932	0.846	0.816	0.714	1.046	0.857	1.031	1.05		1.357	0.2885	1.029		1.874		1.022		1.58
O43566	Regulator of G-protein signaling 14 OS=Homo sapiens OX=9606 GN=RGS14 PE=1 SV=4	RGS14	61.446	20.828	5.1	3	3	3	1.216	1.354	0.842	1.004	0.844	1.302	0.877	0.935	0.661	1.216	0.508	0.098544	0.981	0.82828	0.96	0.65066	0.826	0.35888	1.441	0.138759	1.448	0.055063
O43583	Density-regulated protein OS=Homo sapiens OX=9606 GN=DENR PE=1 SV=2	DENR	22.092	16.868	12.1	3	6	3	0.854	0.621	1.473	0.931	1.412	0.862	0.94	0.999	1.983	1.02	2.3	0.000102012	1.12	0.85306	1.567	0.0040352	0.913	0.3963	0.605	0.0154237	0.622	0.0056971
O43586	Proline-serine-threonine phosphatase-interacting protein 1 OS=Homo sapiens OX=9606 GN=PSTPIP1 PE=1 SV=1	PSTPIP1	47.591	34.505	6	3	3	3	1.101	1.989	0.599	1.366	0.965	0.767	0.962	0.969	0.914	0.808	1.192	0.79384	1.335	0.3555	0.623	0.2975	1.691	0.0023171	1.141	0.191735	2.053	0.094756
O43592	Exportin-T OS=Homo sapiens OX=9606 GN=XPOT PE=1 SV=2	XPOT	109.96	24.476	4	4	5	4	0.946	1.304	0.577	0.983	0.7	1.878	0.742	1.095	0.376	1.381	0.2	0.0169405	0.722	0.26724	0.778	0.127641	0.712	0.32694	1.351	0.108997	1.191	0.4694
O43598	2'-deoxynucleoside 5'-phosphate N-hydrolase 1 OS=Homo sapiens OX=9606 GN=DNPH1 PE=1 SV=1	DNPH1	19.108	16.602	10.3	1	2	1	1.434	0.74	1.521	0.844	1.789	0.61	0.533	0.961	1.672	1.116	2.741		1.24	0.3722	2.854		0.756		0.802		0.77
O43615	Mitochondrial import inner membrane translocase subunit TIM44 OS=Homo sapiens OX=9606 GN=TIMM44 PE=1 SV=2	TIMM44	51.355	80.024	19.2	8	9	8	0.711	0.597	0.777	0.701	0.531	2.615	1.567	0.611	0.349	1.211	0.133	3.7607e-06	0.48	0.106904	0.496	1.94764e-05	0.579	0.00041825	1.339	0.030661	0.977	0.53622
O43633	Charged multivesicular body protein 2a OS=Homo sapiens OX=9606 GN=CHMP2A PE=1 SV=1	CHMP2A	25.104	33.009	20.7	4	8	4	0.891	0.655	1.413	0.89	1.113	1.548	0.784	0.77	1.591	0.736	1.028	0.47592	1.099	0.70792	1.802	0.35908	1.209	0.143761	0.801	0.6816	0.851	0.87218
O43665	Regulator of G-protein signaling 10 OS=Homo sapiens OX=9606 GN=RGS10 PE=1 SV=2	RGS10	20.236	16.209	13.9	2	6	2	0.974	0.849	1.186	0.791	1.874	0.611	0.893	1.509	1.602	0.848	2.622	0.0060176	0.942	0.9669	1.328	0.32378	0.933	0.70028	0.52	0.039396	0.563	0.048103
O43670	BUB3-interacting and GLEBS motif-containing protein ZNF207 OS=Homo sapiens OX=9606 GN=ZNF207 PE=1 SV=1	ZNF207	50.75	9.9297	2.7	1	2	1	0.868	0.863	1.325	0.841	0.886	1.42	1.177	1.019	0.862	1.032	0.607		0.86	0.22634	1.126		0.815		0.98		0.847
O43674	NADH dehydrogenase [ubiquinone] 1 beta subcomplex subunit 5, mitochondrial OS=Homo sapiens OX=9606 GN=NDUFB5 PE=1 SV=1	NDUFB5	21.75	14.974	11.1	2	2	2	1.221	0.979	0.892	1.007	0.768	1.249	1.193	0.901	0.704	1.35	0.564	0.060437	0.88	0.40752	0.748	0.062619	0.746	0.124941	1.59	0.034119	1.087	0.42812
O43676	NADH dehydrogenase [ubiquinone] 1 beta subcomplex subunit 3 OS=Homo sapiens OX=9606 GN=NDUFB3 PE=1 SV=3	NDUFB3	11.402	21.574	21.4	2	2	2	1.089	1.017	0.957	1.121	0.698	1.206	1.454	0.711	0.528	1.386	0.438	0.113242	0.864	0.55636	0.658	0.051225	0.809	0.11748	1.56	0.127559	1.43	0.0132231
O43677	NADH dehydrogenase [ubiquinone] 1 subunit C1, mitochondrial OS=Homo sapiens OX=9606 GN=NDUFC1 PE=1 SV=1	NDUFC1	8.7341	6.9468	13.2	1	1	1	1.302	1.585	1.007	0.806	0.781	0.998	1.305	0.778	0.514	1.076	0.515		1.056	0.99224	0.772		0.749		1.667		2.037
O43678	NADH dehydrogenase [ubiquinone] 1 alpha subcomplex subunit 2 OS=Homo sapiens OX=9606 GN=NDUFA2 PE=1 SV=3	NDUFA2	10.921	24.962	27.3	3	5	3	1.13	1.156	0.707	1.158	0.471	1.418	1.39	0.791	0.438	1.503	0.309	8.3104e-08	0.823	0.57934	0.509	0.00125785	0.77	0.0074217	2.399	1.63456e-05	1.461	0.0027824
O43681	ATPase ASNA1 OS=Homo sapiens OX=9606 GN=ASNA1 PE=1 SV=2	ASNA1	38.792	67.145	22.4	6	15	6	0.819	0.951	1.215	0.995	1.457	0.932	0.939	0.901	1.65	0.896	1.77	1.55414e-05	1.099	0.60418	1.294	0.128479	1.11	0.041499	0.562	2.4855e-08	1.055	0.76376
O43684	Mitotic checkpoint protein BUB3 OS=Homo sapiens OX=9606 GN=BUB3 PE=1 SV=1	BUB3	37.154	18.149	7.3	2	2	2	1.082	1.003	1.214	0.878	1.043	1.143	0.938	1.047	1.064	1.114	0.931	0.83862	0.992	0.85852	1.294	0.2568	0.788	0.28822	1.037	0.81416	0.958	0.71518
O43704	Sulfotransferase family cytosolic 1B member 1 OS=Homo sapiens OX=9606 GN=SULT1B1 PE=1 SV=2	SULT1B1	34.899	6.7651	3	1	1	1	1.33	1.834	0.551	1.555	0.662	0.759	0.803	1.007	1.054	0.877	1.389		1.539	0.137702	0.686		1.773		2.009		1.821
O43707	Alpha-actinin-4 OS=Homo sapiens OX=9606 GN=ACTN4 PE=1 SV=2	ACTN4	104.85	323.31	49.4	44	106	31	1.062	1.998	0.729	1.177	0.714	0.861	0.843	1.143	0.648	1.023	0.753	4.1663e-09	1.225	0.5528	0.865	1.50374e-05	1.151	1.54931e-05	1.487	1e-32	1.748	1.11022e-16
O43708	Maleylacetoacetate isomerase OS=Homo sapiens OX=9606 GN=GSTZ1 PE=1 SV=3	GSTZ1	24.212	14.814	10.2	2	2	2
O43709	Probable 18S rRNA (guanine-N(7))-methyltransferase OS=Homo sapiens OX=9606 GN=BUD23 PE=1 SV=2	BUD23	31.88	6.1858	6.4	1	1	1
O43719	HIV Tat-specific factor 1 OS=Homo sapiens OX=9606 GN=HTATSF1 PE=1 SV=1	HTATSF1	85.852	14.187	2.9	2	2	2	1.065	1.109	1.057	1.144	0.839	1.218	1.073	0.933	0.935	0.98	0.768		1.053	0.44858	0.985		1.167		1.269		1.189
O43747	AP-1 complex subunit gamma-1 OS=Homo sapiens OX=9606 GN=AP1G1 PE=1 SV=5	AP1G1	91.35	57.848	7.3	6	11	6	1.08	1.286	0.924	1.113	0.843	1.351	1.017	0.952	0.695	0.905	0.514	0.003999	1.006	0.9939	0.909	0.081703	1.23	0.0182571	1.281	0.037358	1.351	0.00082314
O43760	Synaptogyrin-2 OS=Homo sapiens OX=9606 GN=SYNGR2 PE=1 SV=1	SYNGR2	24.81	8.964	4.5	1	1	1	1.092	1.014	1.514	0.873	0.975	1.105	1.089	0.933	0.568	1.145	0.514		0.965	0.64416	1.39		0.762		1.12		1.087
O43765	Small glutamine-rich tetratricopeptide repeat-containing protein alpha OS=Homo sapiens OX=9606 GN=SGTA PE=1 SV=1	SGTA	34.063	126.69	29.1	9	15	9	1.06	0.911	1.325	0.919	1.266	0.793	0.834	1.185	1.601	0.931	2.019	5.3385e-07	1.161	0.3518	1.589	2.4977e-05	0.987	0.54776	0.837	0.0029224	0.769	0.0032025
O43772	Mitochondrial carnitine/acylcarnitine carrier protein OS=Homo sapiens OX=9606 GN=SLC25A20 PE=1 SV=1	SLC25A20	32.943	42.223	13	6	7	6	1.228	0.872	1.18	0.783	0.711	1.518	1.406	0.645	0.421	1.091	0.277	0.0030217	0.835	0.4891	0.839	0.054822	0.718	0.00043649	1.727	0.00030254	1.352	0.013641
O43776	Asparagine--tRNA ligase, cytoplasmic OS=Homo sapiens OX=9606 GN=NARS PE=1 SV=1	NARS	62.942	94.518	18.1	8	14	8	1.138	1.049	1.046	0.916	0.659	2.041	0.783	0.819	0.564	1.135	0.276	4.2515e-08	0.867	0.7332	1.336	0.00128205	0.807	0.0125425	1.727	5.5877e-05	1.281	0.00060385
O43805	Sjoegren syndrome nuclear autoantigen 1 OS=Homo sapiens OX=9606 GN=SSNA1 PE=1 SV=2	SSNA1	13.596	7.9623	9.2	1	1	1
O43809	Cleavage and polyadenylation specificity factor subunit 5 OS=Homo sapiens OX=9606 GN=NUDT21 PE=1 SV=1	NUDT21	26.227	13.525	8.8	2	3	2	1.028	0.936	1.125	0.944	0.738	1.75	1.301	0.705	0.65	0.837	0.371	0.027305	0.878	0.69972	0.865	0.20128	1.128	0.51272	1.393	0.32636	1.328	0.39038
O43813	LanC-like protein 1 OS=Homo sapiens OX=9606 GN=LANCL1 PE=1 SV=1	LANCL1	45.283	66.444	22.1	8	14	8	0.938	1.002	0.978	1.035	1.316	0.901	0.997	1.109	1.545	0.94	1.715	1.0335e-10	1.045	0.76398	0.981	0.45144	1.101	0.95694	0.713	1.4768e-06	0.904	0.090063
O43815	Striatin OS=Homo sapiens OX=9606 GN=STRN PE=1 SV=4	STRN	86.131	43.397	5.4	4	4	4	1.137	1.29	0.998	1.13	0.802	1.287	0.953	1.01	0.636	0.952	0.494	0.22478	1.037	0.8865	1.047	0.75002	1.187	0.40254	1.418	0.22602	1.277	0.36088
O43818	U3 small nucleolar RNA-interacting protein 2 OS=Homo sapiens OX=9606 GN=RRP9 PE=1 SV=1	RRP9	51.84	13.334	3.8	2	2	2	0.969	1.097	0.748	0.767	0.658	2.163	1.307	0.726	0.556	0.82	0.257		0.729	0.37266	0.572		0.935		1.473		1.511
O43819	Protein SCO2 homolog, mitochondrial OS=Homo sapiens OX=9606 GN=SCO2 PE=1 SV=3	SCO2	29.81	37.066	14.3	3	4	3	0.749	0.818	1.265	0.768	0.969	1.672	1.119	0.827	0.898	1.223	0.537	0.33366	0.774	0.143759	1.13	0.28774	0.628	0.151276	0.773	0.57068	0.989	0.91946
O43823	A-kinase anchor protein 8 OS=Homo sapiens OX=9606 GN=AKAP8 PE=1 SV=1	AKAP8	76.107	8.2035	1.3	1	1	1
O43837	Isocitrate dehydrogenase [NAD] subunit beta, mitochondrial OS=Homo sapiens OX=9606 GN=IDH3B PE=1 SV=2	IDH3B	42.183	78.16	20	8	19	8	0.88	0.726	1.092	0.652	0.831	1.295	2.354	0.701	0.451	0.973	0.348	1.71903e-05	0.618	0.13866	0.464	3.9588e-09	0.67	1.7153e-06	1.059	0.27852	1.036	0.158624
O43847	Nardilysin OS=Homo sapiens OX=9606 GN=NRDC PE=1 SV=2	NRDC	131.57	62.034	8.3	9	9	9	1.236	1.358	0.812	0.882	1.017	1.201	0.76	0.992	0.844	1.086	0.703	0.0029369	1.015	0.98294	1.068	0.75182	0.812	0.114739	1.215	0.078243	1.369	0.0104837
O43852	Calumenin OS=Homo sapiens OX=9606 GN=CALU PE=1 SV=2	CALU	37.106	117.75	28.3	10	15	10	1.123	0.421	1.223	0.512	0.495	2.626	1.17	0.563	0.64	0.818	0.244	2.6258e-10	0.691	0.49632	1.045	0.88006	0.626	0.00053747	2.269	8.8082e-10	0.748	0.20534
O43865	S-adenosylhomocysteine hydrolase-like protein 1 OS=Homo sapiens OX=9606 GN=AHCYL1 PE=1 SV=2	AHCYL1	58.951	43.036	11.9	6	7	6	1.182	1.501	0.822	0.987	0.685	1.305	0.762	1.02	0.546	1.257	0.418	0.132883	1.002	0.92418	1.079	0.79166	0.785	0.022536	1.726	0.067615	1.472	0.038138
O43920	NADH dehydrogenase [ubiquinone] iron-sulfur protein 5 OS=Homo sapiens OX=9606 GN=NDUFS5 PE=1 SV=3	NDUFS5	12.517	27.251	23.6	2	2	2	1.048	0.936	0.898	1.141	0.648	1.329	1.489	0.81	0.692	1.158	0.521	0.078643	0.868	0.55468	0.603	0.078245	0.985	0.9513	1.617	0.029476	1.156	0.35692
O60216	Double-strand-break repair protein rad21 homolog OS=Homo sapiens OX=9606 GN=RAD21 PE=1 SV=2	RAD21	71.689	11.431	3.8	2	2	2
O60220	Mitochondrial import inner membrane translocase subunit Tim8 A OS=Homo sapiens OX=9606 GN=TIMM8A PE=1 SV=1	TIMM8A	10.998	28.136	34	3	3	3	1.072	1.202	1.374	0.686	0.727	1.153	1.222	0.772	0.631	1.394	0.547	0.013637	0.942	0.72838	1.124	0.022375	0.492	0.0172752	1.475	0.141482	1.557	0.107161
O60231	Pre-mRNA-splicing factor ATP-dependent RNA helicase DHX16 OS=Homo sapiens OX=9606 GN=DHX16 PE=1 SV=2	DHX16	119.26	5.8978	2.1	2	2	1	1.178	1.9	0.225	1.831	1.104	0.711	0.941	1.168	0.393	0.884	0.553		1.15	0.75154	0.239		2.071		1.067		1.627
O60232	Sjoegren syndrome/scleroderma autoantigen 1 OS=Homo sapiens OX=9606 GN=SSSCA1 PE=1 SV=1	SSSCA1	21.474	18.094	16.1	2	2	2
O60234	Glia maturation factor gamma OS=Homo sapiens OX=9606 GN=GMFG PE=1 SV=1	GMFG	16.801	26.673	22.5	3	5	2	1.03	1.429	1.096	1.201	1.033	0.771	0.871	0.983	1.242	1.018	1.611	0.046518	1.283	0.0136397	1.258	0.040577	1.18	0.192984	0.997	0.97044	1.454	0.031456
O60235	Transmembrane protease serine 11D OS=Homo sapiens OX=9606 GN=TMPRSS11D PE=1 SV=1	TMPRSS11D	46.263	-2	2.2	1	1	1
O60238	BCL2/adenovirus E1B 19 kDa protein-interacting protein 3-like OS=Homo sapiens OX=9606 GN=BNIP3L PE=1 SV=1	BNIP3L	23.93	8.0882	4.6	1	1	1
O60256	Phosphoribosyl pyrophosphate synthase-associated protein 2 OS=Homo sapiens OX=9606 GN=PRPSAP2 PE=1 SV=1	PRPSAP2	40.925	111.06	22.8	7	14	6	0.854	0.694	1.151	0.943	1.811	0.674	1.006	1.118	1.886	0.894	2.798	5.3367e-09	1.005	0.9924	1.144	0.059717	1.055	0.50858	0.472	2.6779e-07	0.621	0.0045825
O60262	Guanine nucleotide-binding protein G(I)/G(S)/G(O) subunit gamma-7 OS=Homo sapiens OX=9606 GN=GNG7 PE=1 SV=1	GNG7	7.5217	31.699	44.1	2	5	2	1.088	1.091	1.141	1.159	0.733	0.985	1.027	0.942	0.706	1.097	0.717	0.0178773	1.084	0.54182	1.111	0.82308	1.057	0.30198	1.484	0.039615	1.158	0.29676
O60264	SWI/SNF-related matrix-associated actin-dependent regulator of chromatin subfamily A member 5 OS=Homo sapiens OX=9606 GN=SMARCA5 PE=1 SV=1	SMARCA5	121.9	83.184	11.2	11	13	11	1.151	1.354	0.735	0.956	0.642	1.267	1.39	0.895	0.465	1.081	0.367	1.9011e-07	0.884	0.52918	0.529	1.55354e-05	0.884	0.030777	1.793	1.3252e-06	1.513	3.2128e-06
O60268	Uncharacterized protein KIAA0513 OS=Homo sapiens OX=9606 GN=KIAA0513 PE=1 SV=1	KIAA0513	46.638	12.334	2.9	1	1	1	1.252	1.966	0.652	1.077	0.73	0.912	1.091	1.026	0.575	0.882	0.63		1.19	0.74202	0.598		1.221		1.715		1.916
O60271	C-Jun-amino-terminal kinase-interacting protein 4 OS=Homo sapiens OX=9606 GN=SPAG9 PE=1 SV=4	SPAG9	146.2	11.519	1.4	2	2	2
O60281	Zinc finger protein 292 OS=Homo sapiens OX=9606 GN=ZNF292 PE=1 SV=3	ZNF292	304.81	10.903	0.6	2	2	2
O60307	Microtubule-associated serine/threonine-protein kinase 3 OS=Homo sapiens OX=9606 GN=MAST3 PE=1 SV=2	MAST3	143.14	6.2365	1.3	2	2	1	1.054	1.222	0.808	1.016	0.875	1.64	0.944	0.963	0.73	0.901	0.445		0.907	0.58922	0.856		1.128		1.205		1.269
O60313	Dynamin-like 120 kDa protein, mitochondrial OS=Homo sapiens OX=9606 GN=OPA1 PE=1 SV=3	OPA1	111.63	126.12	14.8	13	15	13	1.394	1.056	0.986	1.096	0.737	1.237	1.505	0.688	0.558	0.838	0.451	0.0037838	1.017	0.9173	0.655	0.000139608	1.308	6.0974e-05	1.891	0.000195868	1.535	5.7064e-05
O60318	Germinal-center associated nuclear protein OS=Homo sapiens OX=9606 GN=MCM3AP PE=1 SV=2	MCM3AP	218.4	-2	0.4	1	1	1	1.452	2.087	0.42	1.189	0.537	1.23	1.032	0.783	0.518	0.704	0.421		1.322	0.67634	0.407		1.689		2.704		2.665
O60331	Phosphatidylinositol 4-phosphate 5-kinase type-1 gamma OS=Homo sapiens OX=9606 GN=PIP5K1C PE=1 SV=2	PIP5K1C	73.259	10.811	1.6	1	1	1	0.888	1.235	1.006	0.891	1.103	1.342	1.192	0.852	1.101	0.807	0.82		0.967	0.84946	0.844		1.104		0.805		1.45
O60333	Kinesin-like protein KIF1B OS=Homo sapiens OX=9606 GN=KIF1B PE=1 SV=5	KIF1B	204.47	12.288	1.1	2	2	2
O60341	Lysine-specific histone demethylase 1A OS=Homo sapiens OX=9606 GN=KDM1A PE=1 SV=2	KDM1A	92.902	15.898	2.5	2	2	2	1.159	1.659	0.897	0.783	0.668	1.288	1.066	0.939	0.6	1.025	0.466		1.022	0.9352	0.841		0.764		1.735		1.767
O60361	Putative nucleoside diphosphate kinase OS=Homo sapiens OX=9606 GN=NME2P1 PE=5 SV=1	NME2P1	15.529	-2	47.4	7	27	1
O60437	Periplakin OS=Homo sapiens OX=9606 GN=PPL PE=1 SV=4	PPL	204.74	10.501	1.4	2	2	2	1.462	0.832	0.989	0.945	0.868	1.574	0.818	1.086	0.808	0.83	0.513		0.973	0.91278	1.209		1.139		1.684		0.766
O60449	Lymphocyte antigen 75 OS=Homo sapiens OX=9606 GN=LY75 PE=1 SV=3	LY75	198.31	22.513	2	3	3	3	1.412	1.445	0.816	0.902	1.024	0.695	1.037	1.244	0.757	1.126	1.089		1.04	0.91362	0.787		0.801		1.379		1.162
O60486	Plexin-C1 OS=Homo sapiens OX=9606 GN=PLXNC1 PE=1 SV=1	PLXNC1	175.74	17.464	1.6	3	4	3	1.335	1.196	0.965	1.087	0.942	0.955	1.007	1.07	0.857	1.004	0.897		1.093	0.39234	0.958		1.083		1.417		1.118
O60488	Long-chain-fatty-acid--CoA ligase 4 OS=Homo sapiens OX=9606 GN=ACSL4 PE=1 SV=2	ACSL4	79.187	166.61	11.8	8	12	7	0.78	1.063	1.102	0.989	1.556	0.849	1.079	1.069	1.259	1.053	1.483	2.3647e-05	0.926	0.59882	1.021	0.95938	0.939	0.097599	0.501	4.79616e-13	0.994	0.35622
O60493	Sorting nexin-3 OS=Homo sapiens OX=9606 GN=SNX3 PE=1 SV=3	SNX3	18.762	23.582	17.9	3	5	2	1.463	1.712	0.765	0.912	0.693	1.101	0.824	1.154	0.456	1.176	0.414	0.029259	1.073	0.95922	0.928	0.75722	0.776	0.115261	2.111	0.00068494	1.484	0.0098195
O60496	Docking protein 2 OS=Homo sapiens OX=9606 GN=DOK2 PE=1 SV=2	DOK2	45.378	17.451	5.1	2	2	2
O60502	Protein O-GlcNAcase OS=Homo sapiens OX=9606 GN=MGEA5 PE=1 SV=2	MGEA5	102.91	37.981	5.3	4	5	4	1.218	1.395	0.864	0.844	0.601	1.396	0.874	1.053	0.565	1.126	0.405	0.0022828	0.968	0.84338	0.989	0.82506	0.75	0.055921	2.027	0.0048621	1.325	0.34044
O60506	Heterogeneous nuclear ribonucleoprotein Q OS=Homo sapiens OX=9606 GN=SYNCRIP PE=1 SV=2	SYNCRIP	69.602	98.313	21.8	14	33	8	1.153	1.082	1.062	0.812	0.727	1.463	0.833	1.015	0.591	1.291	0.404	9.945e-07	0.882	0.52292	1.275	6.3015e-05	0.629	3.2099e-08	1.586	0.000144102	1.066	0.322
O60524	Nuclear export mediator factor NEMF OS=Homo sapiens OX=9606 GN=NEMF PE=1 SV=4	NEMF	122.95	12.412	1.7	2	2	2	1.407	1.227	1.163	0.724	0.437	1.424	0.957	1.232	0.455	0.898	0.32	0.00199808	1.006	0.99796	1.215	0.3636	0.806	0.0073202	3.22	0.134662	0.996	0.96456
O60547	GDP-mannose 4,6 dehydratase OS=Homo sapiens OX=9606 GN=GMDS PE=1 SV=1	GMDS	41.949	93.961	19.4	7	10	7	1.107	0.848	1.361	0.91	1.267	0.815	0.845	1.156	1.288	1.215	1.58	0.00076003	1.041	0.76956	1.611	0.000103049	0.749	2.4668e-05	0.874	0.195858	0.734	0.00104245
O60568	Procollagen-lysine,2-oxoglutarate 5-dioxygenase 3 OS=Homo sapiens OX=9606 GN=PLOD3 PE=1 SV=1	PLOD3	84.784	8.6208	1.9	1	1	1
O60573	Eukaryotic translation initiation factor 4E type 2 OS=Homo sapiens OX=9606 GN=EIF4E2 PE=1 SV=1	EIF4E2	28.362	9.4867	4.1	1	1	1	1.244	0.891	1.689	0.844	0.283	1.622	0.809	0.986	0.3	1.201	0.185		1.014	0.97216	2.088		0.703		4.396		0.904
O60603	Toll-like receptor 2 OS=Homo sapiens OX=9606 GN=TLR2 PE=1 SV=1	TLR2	89.837	6.8673	1.4	1	1	1
O60610	Protein diaphanous homolog 1 OS=Homo sapiens OX=9606 GN=DIAPH1 PE=1 SV=2	DIAPH1	141.35	222.06	19.2	26	53	26	0.973	1.113	0.963	1.159	1.078	0.897	1.074	1.215	1.174	0.913	1.309	7.0665e-07	1.04	0.57438	0.897	0.0039042	1.269	4.4533e-11	0.903	0.0021803	0.916	0.040823
O60613	Selenoprotein F OS=Homo sapiens OX=9606 GN=SELENOF PE=1 SV=4	SELENOF	18.092	7.8842	7.3	1	1	1
O60645	Exocyst complex component 3 OS=Homo sapiens OX=9606 GN=EXOC3 PE=1 SV=2	EXOC3	86.844	49.905	7.1	5	5	5	1.164	1.348	0.723	1.034	1.006	1.063	1.119	0.969	0.948	1.056	0.892		1.001	0.86652	0.646		0.979		1.157		1.391
O60664	Perilipin-3 OS=Homo sapiens OX=9606 GN=PLIN3 PE=1 SV=3	PLIN3	47.074	41.377	12.2	5	6	5	0.904	1.943	1.036	0.813	1.061	0.505	0.614	1.485	0.936	1.163	1.853	0.0048824	1.167	0.5048	1.687	0.0108605	0.699	0.0030448	0.852	0.101076	1.308	0.9979
O60669	Monocarboxylate transporter 2 OS=Homo sapiens OX=9606 GN=SLC16A7 PE=1 SV=2	SLC16A7	52.2	13.167	2.3	1	1	1
O60671	Cell cycle checkpoint protein RAD1 OS=Homo sapiens OX=9606 GN=RAD1 PE=1 SV=1	RAD1	31.827	5.8866	3.2	1	1	1
O60673	DNA polymerase zeta catalytic subunit OS=Homo sapiens OX=9606 GN=REV3L PE=1 SV=2	REV3L	352.77	-2	0.3	1	1	1
O60674	Tyrosine-protein kinase JAK2 OS=Homo sapiens OX=9606 GN=JAK2 PE=1 SV=2	JAK2	130.67	6.4167	0.8	1	1	1
O60684	Importin subunit alpha-7 OS=Homo sapiens OX=9606 GN=KPNA6 PE=1 SV=1	KPNA6	60.029	64.424	10.4	5	9	4	0.931	0.893	1.005	0.837	1.347	0.936	1.212	0.999	1.482	0.945	1.583	0.016979	0.946	0.61002	0.829	0.124343	0.886	0.57088	0.691	0.00118239	0.894	0.52904
O60701	UDP-glucose 6-dehydrogenase OS=Homo sapiens OX=9606 GN=UGDH PE=1 SV=1	UGDH	55.023	13.9	3.6	2	2	2	0.99	0.981	1.673	0.745	0.545	2.019	0.593	0.804	0.412	1.152	0.204		0.939	0.91048	2.821		0.647		1.817		1.22
O60711	Leupaxin OS=Homo sapiens OX=9606 GN=LPXN PE=1 SV=1	LPXN	43.332	7.932	2.8	1	1	1
O60732	Melanoma-associated antigen C1 OS=Homo sapiens OX=9606 GN=MAGEC1 PE=1 SV=3	MAGEC1	123.64	11.065	1.6	2	2	2
O60749	Sorting nexin-2 OS=Homo sapiens OX=9606 GN=SNX2 PE=1 SV=2	SNX2	58.47	105.54	18.5	9	13	8	1.038	1.376	0.987	0.839	0.952	1.097	0.945	1.059	0.967	0.9	0.881	0.117681	1.051	0.67318	1.044	0.72178	0.932	0.36512	1.09	0.171665	1.299	0.076403
O60762	Dolichol-phosphate mannosyltransferase subunit 1 OS=Homo sapiens OX=9606 GN=DPM1 PE=1 SV=1	DPM1	29.634	15.549	8.5	2	2	2	0.898	0.665	1.143	0.881	0.511	1.524	1.626	0.696	0.666	1.476	0.437		0.729	0.38986	0.703		0.597		1.757		0.955
O60763	General vesicular transport factor p115 OS=Homo sapiens OX=9606 GN=USO1 PE=1 SV=2	USO1	107.89	292.78	18.5	15	25	15	1.329	0.819	1.004	1.015	0.705	1.478	1.019	0.89	0.658	1.105	0.445	2.7958e-08	0.928	0.68372	0.985	0.25426	0.919	0.5082	1.885	4.2864e-09	0.92	0.70818
O60784	Target of Myb protein 1 OS=Homo sapiens OX=9606 GN=TOM1 PE=1 SV=2	TOM1	53.818	32.279	7.1	4	4	4	0.975	0.952	1.407	1.025	1.006	1.104	0.979	1.145	1.368	0.892	1.239	0.37838	1.117	0.32836	1.437	0.065763	1.149	0.41116	0.969	0.68254	0.831	0.71724
O60825	6-phosphofructo-2-kinase/fructose-2,6-bisphosphatase 2 OS=Homo sapiens OX=9606 GN=PFKFB2 PE=1 SV=2	PFKFB2	58.476	38.139	11.3	6	7	6	2.187	1.432	0.528	0.757	0.683	1.255	0.856	1.042	0.657	0.777	0.524	8.1649e-05	1.206	0.82534	0.617	0.006057	0.974	0.50426	3.202	9.6341e-07	1.374	0.032585
O60826	Coiled-coil domain-containing protein 22 OS=Homo sapiens OX=9606 GN=CCDC22 PE=1 SV=1	CCDC22	70.755	34.953	8	4	4	4	1.034	1.345	0.818	0.903	1.193	1.096	0.913	1.015	0.795	1.008	0.725	0.101758	0.937	0.46898	0.896	0.169423	0.896	0.84084	0.867	0.62856	1.325	0.0152162
O60831	PRA1 family protein 2 OS=Homo sapiens OX=9606 GN=PRAF2 PE=1 SV=1	PRAF2	19.258	7.487	6.2	1	1	1	1.387	1.143	0.708	0.893	0.84	1.431	1.021	0.755	0.718	1.342	0.502		0.9	0.56386	0.693		0.665		1.651		1.514
O60832	H/ACA ribonucleoprotein complex subunit DKC1 OS=Homo sapiens OX=9606 GN=DKC1 PE=1 SV=3	DKC1	57.673	6.9994	2.5	1	1	1	1.413	1.018	0.84	0.931	0.934	1.258	0.808	1.217	1.044	0.957	0.83		1.014	0.92316	1.04		0.973		1.513		0.836
O60841	Eukaryotic translation initiation factor 5B OS=Homo sapiens OX=9606 GN=EIF5B PE=1 SV=4	EIF5B	138.83	116.66	7	8	9	8	1.129	1.11	1.125	0.943	0.858	1.245	1.009	0.936	0.713	1.143	0.573	0.045483	0.967	0.73322	1.115	0.21388	0.825	0.23252	1.316	0.175201	1.186	0.79498
O60869	Endothelial differentiation-related factor 1 OS=Homo sapiens OX=9606 GN=EDF1 PE=1 SV=1	EDF1	16.368	27.062	23	3	3	3	1.032	0.761	1.518	0.948	0.631	1.753	0.75	0.944	0.767	1.035	0.438	0.091883	0.983	0.95174	2.024	0.00094149	0.916	0.4996	1.635	0.045956	0.806	0.3408
O60879	Protein diaphanous homolog 2 OS=Homo sapiens OX=9606 GN=DIAPH2 PE=1 SV=1	DIAPH2	125.57	23.83	3.3	4	4	4	0.994	2.147	0.551	1.055	0.755	1.079	0.836	0.952	0.52	1.06	0.482	0.0160032	1.125	0.96446	0.659	0.00165802	0.995	0.97596	1.317	0.055365	2.255	0.0041162
O60884	DnaJ homolog subfamily A member 2 OS=Homo sapiens OX=9606 GN=DNAJA2 PE=1 SV=1	DNAJA2	45.745	58.879	17.2	6	9	6	0.903	1.09	1.225	1.003	1.047	1.1	1.096	1.054	1.033	0.939	0.939	0.63464	1.003	0.99998	1.118	0.126183	1.068	0.71774	0.862	0.175196	1.034	0.49218
O60888	Protein CutA OS=Homo sapiens OX=9606 GN=CUTA PE=1 SV=2	CUTA	19.116	17.643	7.8	1	2	1	1.079	0.977	1.48	1.015	1.093	0.592	0.752	1.251	1.734	1	2.929	0.069424	1.341	0.126437	1.968	0.083863	1.015	0.8918	0.987	0.86692	0.781	0.20916
O60925	Prefoldin subunit 1 OS=Homo sapiens OX=9606 GN=PFDN1 PE=1 SV=2	PFDN1	14.21	40.908	24.6	4	8	4	0.964	1.373	0.958	1.264	0.98	1.088	0.809	1.094	0.962	0.882	0.884	0.23988	1.138	0.24384	1.184	0.022401	1.433	0.000101913	0.984	0.43554	1.255	0.00173638
O60927	E3 ubiquitin-protein ligase PPP1R11 OS=Homo sapiens OX=9606 GN=PPP1R11 PE=1 SV=1	PPP1R11	13.952	16.328	19.8	2	3	2	1.032	1.207	1.369	0.982	1.024	0.765	0.946	1.015	1.186	1.144	1.55		1.18	0.097941	1.447		0.858		1.008		1.189
O60934	Nibrin OS=Homo sapiens OX=9606 GN=NBN PE=1 SV=1	NBN	84.958	13.875	2.9	2	2	2	0.741	0.674	1.377	1.026	0.463	2.212	1.505	0.465	0.537	0.752	0.243		0.807	0.84782	0.915		1.364		1.6		1.449
O75015	Low affinity immunoglobulin gamma Fc region receptor III-B OS=Homo sapiens OX=9606 GN=FCGR3B PE=1 SV=2	FCGR3B	26.216	5.867	5.2	1	1	1
O75027	ATP-binding cassette sub-family B member 7, mitochondrial OS=Homo sapiens OX=9606 GN=ABCB7 PE=1 SV=2	ABCB7	82.64	23.964	6.1	4	4	4
O75044	SLIT-ROBO Rho GTPase-activating protein 2 OS=Homo sapiens OX=9606 GN=SRGAP2 PE=1 SV=3	SRGAP2	120.87	36.748	4.7	5	5	5	0.835	0.972	0.97	1.088	0.919	1.614	1.092	1.09	0.734	0.874	0.455	0.018803	0.823	0.197157	0.888	0.131117	1.245	0.26428	0.909	0.62868	0.892	0.54962
O75063	Glycosaminoglycan xylosylkinase OS=Homo sapiens OX=9606 GN=FAM20B PE=1 SV=1	FAM20B	46.432	6.4501	2.2	1	1	1	1.07	1.144	1.162	0.873	0.733	1.488	1.059	1.039	0.619	0.905	0.416		0.932	0.68704	1.097		0.965		1.46		1.101
O75064	DENN domain-containing protein 4B OS=Homo sapiens OX=9606 GN=DENND4B PE=1 SV=4	DENND4B	163.84	7.8144	0.7	1	1	1
O75069	Transmembrane and coiled-coil domains protein 2 OS=Homo sapiens OX=9606 GN=TMCC2 PE=1 SV=3	TMCC2	77.448	17.362	3.9	3	4	3	1.121	1.403	0.653	0.88	0.679	1.49	0.95	1.064	0.857	1.081	0.575	0.134861	0.934	0.70464	0.687	0.155375	0.814	0.150704	1.651	0.011385	1.319	0.23714
O75083	WD repeat-containing protein 1 OS=Homo sapiens OX=9606 GN=WDR1 PE=1 SV=4	WDR1	66.193	251.89	28.5	16	41	16	1.061	1.263	1.006	1.115	1.052	0.936	0.971	1.076	1.074	0.901	1.147	0.003282	1.118	0.061279	1.036	0.169423	1.238	0.00135634	1.009	0.77656	1.174	5.9694e-07
O75116	Rho-associated protein kinase 2 OS=Homo sapiens OX=9606 GN=ROCK2 PE=1 SV=4	ROCK2	160.9	205.8	19.1	26	33	21	1.062	1.244	0.827	1.248	1.172	0.753	1.114	1.202	0.933	0.992	1.239	0.0165594	1.015	0.89266	0.742	1.80462e-05	1.258	0.000156683	0.906	0.43526	1.035	0.68958
O75122	CLIP-associating protein 2 OS=Homo sapiens OX=9606 GN=CLASP2 PE=1 SV=2	CLASP2	141.13	20.322	2.4	3	3	3	1.285	0.865	0.686	1.14	0.491	1.581	1.326	1.082	0.556	0.937	0.352		0.837	0.56082	0.517		1.217		2.617		0.799
O75131	Copine-3 OS=Homo sapiens OX=9606 GN=CPNE3 PE=1 SV=1	CPNE3	60.13	120.26	18.6	10	14	9	0.997	1.523	1.013	1.047	0.999	0.899	0.88	1.053	0.937	1.104	1.042	0.09174	1.118	0.33642	1.151	0.082322	0.948	0.74556	0.998	0.27762	1.446	0.00075882
O75146	Huntingtin-interacting protein 1-related protein OS=Homo sapiens OX=9606 GN=HIP1R PE=1 SV=2	HIP1R	119.39	19.885	3.6	3	3	2
O75157	TSC22 domain family protein 2 OS=Homo sapiens OX=9606 GN=TSC22D2 PE=1 SV=3	TSC22D2	79.227	6.8516	2.4	2	2	1
O75165	DnaJ homolog subfamily C member 13 OS=Homo sapiens OX=9606 GN=DNAJC13 PE=1 SV=5	DNAJC13	254.41	227.96	14.5	29	36	29	1.041	1.3	0.826	1.183	0.941	1.085	1.035	1.08	0.946	0.996	0.872	0.74668	1.031	0.8261	0.798	0.00035765	1.188	0.0028765	1.106	0.52058	1.204	0.00128283
O75170	Serine/threonine-protein phosphatase 6 regulatory subunit 2 OS=Homo sapiens OX=9606 GN=PPP6R2 PE=1 SV=2	PPP6R2	104.94	6.28	1.9	1	1	1	1.302	1.209	0.836	1.204	1.045	0.902	0.981	1.02	1.159	0.925	1.285		1.172	0.108496	0.852		1.302		1.246		1.185
O75175	CCR4-NOT transcription complex subunit 3 OS=Homo sapiens OX=9606 GN=CNOT3 PE=1 SV=1	CNOT3	81.871	9.4114	1.7	1	1	1	0.917	1.03	1.329	1.137	0.815	1.304	1.143	0.936	0.813	0.835	0.623		1.038	0.75574	1.163		1.362		1.125		1.1
O75191	Xylulose kinase OS=Homo sapiens OX=9606 GN=XYLB PE=1 SV=3	XYLB	58.382	19.959	6.3	3	3	3	0.94	0.876	1.088	0.704	1.453	1.002	1.083	0.9	1.775	1.154	1.771		0.963	0.67398	1.005		0.61		0.647		0.973
O75208	Ubiquinone biosynthesis protein COQ9, mitochondrial OS=Homo sapiens OX=9606 GN=COQ9 PE=1 SV=1	COQ9	35.509	14.754	6.6	2	3	2
O75223	Gamma-glutamylcyclotransferase OS=Homo sapiens OX=9606 GN=GGCT PE=1 SV=1	GGCT	21.007	21.686	11.2	2	2	2	0.748	0.493	1.331	0.327	3.056	0.241	0.365	2.393	1.258	1.466	5.22		0.553	0.60752	3.647		0.223		0.245		0.206
O75251	NADH dehydrogenase [ubiquinone] iron-sulfur protein 7, mitochondrial OS=Homo sapiens OX=9606 GN=NDUFS7 PE=1 SV=3	NDUFS7	23.563	21.698	11.3	3	6	3	0.975	0.932	0.676	0.922	0.924	1.322	1.345	0.859	0.738	1.286	0.558	0.0026373	0.74	0.041435	0.503	0.0129229	0.717	0.0157377	1.055	0.41866	1.085	0.49912
O75306	NADH dehydrogenase [ubiquinone] iron-sulfur protein 2, mitochondrial OS=Homo sapiens OX=9606 GN=NDUFS2 PE=1 SV=2	NDUFS2	52.545	31.222	9.1	4	6	4	1.095	0.891	0.738	0.833	0.65	1.633	1.678	0.711	0.443	1.14	0.271	5.6741e-05	0.688	0.21428	0.44	0.00134322	0.731	0.031319	1.685	0.0185966	1.253	0.112143
O75312	Zinc finger protein ZPR1 OS=Homo sapiens OX=9606 GN=ZPR1 PE=1 SV=1	ZPR1	50.925	25.54	7.6	3	3	3
O75323	Protein NipSnap homolog 2 OS=Homo sapiens OX=9606 GN=NIPSNAP2 PE=1 SV=1	NIPSNAP2	33.742	64.381	17.8	6	10	5	0.98	0.799	0.983	0.845	0.774	1.414	1.734	0.689	0.567	1.005	0.401	0.0082596	0.743	0.2435	0.567	0.00080195	0.841	0.56342	1.266	0.4588	1.16	0.23762
O75326	Semaphorin-7A OS=Homo sapiens OX=9606 GN=SEMA7A PE=1 SV=1	SEMA7A	74.823	14.557	3.5	2	2	2	0.63	0.949	1.391	0.612	3.077	0.357	0.508	1.221	1.415	1.546	3.964	0.0070169	0.745	0.86364	2.738	0.0028975	0.396	0.024017	0.205	0.07828	0.777	0.30642
O75340	Programmed cell death protein 6 OS=Homo sapiens OX=9606 GN=PDCD6 PE=1 SV=1	PDCD6	21.868	26.901	12	3	4	3	0.962	1.119	1.179	0.953	1.312	0.894	0.822	1.007	1.494	0.92	1.671	0.036779	1.152	0.25478	1.434	0.042256	1.036	0.7225	0.733	0.47148	1.111	0.43556
O75342	Arachidonate 12-lipoxygenase, 12R-type OS=Homo sapiens OX=9606 GN=ALOX12B PE=1 SV=1	ALOX12B	80.355	-2	1.1	1	1	1	1.415	1.221	0.626	0.835	1.056	1.08	1.175	0.991	0.693	1.262	0.642		0.861	0.2962	0.533		0.662		1.34		1.232
O75347	Tubulin-specific chaperone A OS=Homo sapiens OX=9606 GN=TBCA PE=1 SV=3	TBCA	12.855	45.368	42.6	4	4	4	0.932	0.831	1.369	0.702	2.321	0.73	0.649	1.422	1.191	1.106	1.632	0.00167921	0.807	0.62208	2.109	0.00034348	0.635	0.020924	0.402	0.00091798	0.584	0.054402
O75348	V-type proton ATPase subunit G 1 OS=Homo sapiens OX=9606 GN=ATP6V1G1 PE=1 SV=3	ATP6V1G1	13.757	53.832	30.5	4	6	4	0.916	1.369	1.102	0.989	1.126	0.799	0.859	1.302	1.287	0.906	1.611	1.1983e-06	1.134	0.29966	1.283	0.058383	1.092	0.118662	0.813	0.0096645	1.051	0.95924
O75367	Core histone macro-H2A.1 OS=Homo sapiens OX=9606 GN=H2AFY PE=1 SV=4	H2AFY	39.617	93.733	24.5	6	7	6	1.071	1.283	0.722	1.281	0.846	1.151	1.318	0.812	0.744	0.862	0.646	0.023898	1.022	0.95032	0.548	0.00183627	1.486	0.0020595	1.266	0.49116	1.58	0.120763
O75368	SH3 domain-binding glutamic acid-rich-like protein OS=Homo sapiens OX=9606 GN=SH3BGRL PE=1 SV=1	SH3BGRL	12.774	36.207	44.7	5	5	5	1.262	1.282	0.784	1.081	1.284	0.879	0.886	1.232	0.942	0.957	1.072	0.74596	1.022	0.88624	0.885	0.43476	1.13	0.22502	0.983	0.9148	1.041	0.77392
O75369	Filamin-B OS=Homo sapiens OX=9606 GN=FLNB PE=1 SV=2	FLNB	278.16	78.698	5.3	13	14	10	1.23	2	0.567	0.909	0.95	1.172	1.019	0.906	0.567	0.833	0.484		1.081	0.8943	0.556		1.091		1.295		2.208
O75380	NADH dehydrogenase [ubiquinone] iron-sulfur protein 6, mitochondrial OS=Homo sapiens OX=9606 GN=NDUFS6 PE=1 SV=1	NDUFS6	13.711	50.697	29	3	4	3	1.145	1.186	0.558	1.355	0.471	1.554	1.24	0.691	0.406	1.243	0.261	4.0756e-05	0.894	0.7105	0.45	0.0022639	1.09	0.88574	2.431	0.0011414	1.716	0.0125627
O75381	Peroxisomal membrane protein PEX14 OS=Homo sapiens OX=9606 GN=PEX14 PE=1 SV=1	PEX14	41.236	15.506	6.6	2	3	2	0.893	1.086	0.811	1.043	0.759	1.481	1.233	1.084	0.773	1.011	0.522		0.827	0.21454	0.658		1.032		1.177		1.002
O75390	Citrate synthase, mitochondrial OS=Homo sapiens OX=9606 GN=CS PE=1 SV=2	CS	51.712	115.87	20.6	10	12	10	1.265	1.156	0.844	0.837	0.83	1.252	1.409	0.843	0.512	1.065	0.409	0.00021876	0.855	0.3668	0.599	7.9989e-05	0.786	0.008263	1.524	0.028738	1.371	0.0045848
O75396	Vesicle-trafficking protein SEC22b OS=Homo sapiens OX=9606 GN=SEC22B PE=1 SV=4	SEC22B	24.593	108.11	34.4	6	12	6	1.361	1.039	1.318	0.803	0.718	1.291	0.935	0.897	0.741	0.994	0.574	0.00022393	1.088	0.65558	1.41	0.029582	0.808	0.25838	1.896	0.000178681	1.158	0.31024
O75400	Pre-mRNA-processing factor 40 homolog A OS=Homo sapiens OX=9606 GN=PRPF40A PE=1 SV=2	PRPF40A	108.8	20.943	3.4	3	3	3	1.009	0.944	1.244	0.719	0.998	1.823	1.104	0.701	0.628	0.934	0.344	0.02282	0.817	0.39026	1.127	0.49306	0.77	0.2675	1.011	0.87906	1.347	0.32972
O75427	Leucine-rich repeat and calponin homology domain-containing protein 4 OS=Homo sapiens OX=9606 GN=LRCH4 PE=1 SV=2	LRCH4	73.449	29.159	2.8	1	1	1	1.116	1.348	0.843	1.453	0.702	1.237	0.894	0.976	0.663	0.979	0.536		1.133	0.57946	0.943		1.484		1.59		1.381
O75431	Metaxin-2 OS=Homo sapiens OX=9606 GN=MTX2 PE=1 SV=1	MTX2	29.763	28.224	12.5	3	4	3	1.251	1.025	0.865	0.908	0.809	1.225	1.589	0.717	0.553	1.066	0.451	0.038216	0.851	0.45536	0.544	0.0051029	0.852	0.073536	1.546	0.0088356	1.43	0.085103
O75436	Vacuolar protein sorting-associated protein 26A OS=Homo sapiens OX=9606 GN=VPS26A PE=1 SV=2	VPS26A	38.169	66.954	21.4	5	6	5	0.979	1.497	1.189	0.984	0.829	1.176	0.801	1.027	0.795	1.164	0.676	0.124184	1.089	0.58816	1.484	0.00143823	0.845	0.039881	1.181	0.30494	1.458	1.1426e-06
O75438	NADH dehydrogenase [ubiquinone] 1 beta subcomplex subunit 1 OS=Homo sapiens OX=9606 GN=NDUFB1 PE=1 SV=1	NDUFB1	6.9611	19.19	20.7	2	2	2	1.121	1.082	0.93	1.103	0.427	1.295	1.479	0.63	0.475	1.496	0.367		0.884	0.8653	0.629		0.737		2.625		1.717
O75439	Mitochondrial-processing peptidase subunit beta OS=Homo sapiens OX=9606 GN=PMPCB PE=1 SV=2	PMPCB	54.366	48.238	14.5	7	7	7	1.068	0.908	1.156	0.639	0.722	1.307	1.295	0.733	0.505	1.664	0.386	0.0052028	0.747	0.25438	0.893	0.61182	0.384	0.00081653	1.479	0.0137412	1.239	0.113382
O75477	Erlin-1 OS=Homo sapiens OX=9606 GN=ERLIN1 PE=1 SV=1	ERLIN1	38.925	16.488	10.1	3	5	2	1.168	1.561	0.731	1.183	1.033	0.902	0.991	1.015	0.773	1.069	0.857	0.49722	1.081	0.80106	0.738	0.037856	1.107	0.4864	1.131	0.49448	1.538	0.0124367
O75489	NADH dehydrogenase [ubiquinone] iron-sulfur protein 3, mitochondrial OS=Homo sapiens OX=9606 GN=NDUFS3 PE=1 SV=1	NDUFS3	30.241	67.508	27.3	7	12	7	1.085	0.814	0.906	0.937	0.801	1.396	1.529	0.856	0.848	1.207	0.607	0.0066755	0.793	0.178865	0.593	0.02248	0.776	0.00103902	1.355	0.05464	0.951	0.62486
O75506	Heat shock factor-binding protein 1 OS=Homo sapiens OX=9606 GN=HSBP1 PE=1 SV=1	HSBP1	8.5435	12.028	14.5	1	1	1	1.228	1.499	0.911	0.829	0.752	1.091	0.756	1.338	0.613	1.236	0.562		0.982	0.85584	1.205		0.671		1.633		1.12
O75521	Enoyl-CoA delta isomerase 2, mitochondrial OS=Homo sapiens OX=9606 GN=ECI2 PE=1 SV=4	ECI2	43.585	18.859	6.6	3	5	3	1.398	0.817	0.864	0.585	0.766	1.49	2.08	0.632	0.375	0.859	0.252		0.693	0.2854	0.415		0.681		1.825		1.293
O75530	Polycomb protein EED OS=Homo sapiens OX=9606 GN=EED PE=1 SV=2	EED	50.197	6.8526	2	1	1	1	1.242	1.785	0.627	0.995	0.876	1.216	1.163	0.754	0.521	0.935	0.428		1.046	0.87726	0.539		1.064		1.418		2.367
O75533	Splicing factor 3B subunit 1 OS=Homo sapiens OX=9606 GN=SF3B1 PE=1 SV=3	SF3B1	145.83	99.758	8.9	10	12	10	1.037	1.026	0.935	0.854	0.442	1.981	1.294	0.667	0.488	0.848	0.246	5.8823e-08	0.83	0.77546	0.723	0.00039884	1.007	0.87988	2.346	0.00100099	1.538	0.00100364
O75534	Cold shock domain-containing protein E1 OS=Homo sapiens OX=9606 GN=CSDE1 PE=1 SV=2	CSDE1	88.884	102.13	17.8	13	16	13	1.154	1.003	1.119	0.899	0.672	1.537	0.795	0.957	0.563	1.505	0.366	5.2033e-07	0.867	0.59274	1.408	0.0148029	0.597	0.00106311	1.717	0.023142	1.048	0.7547
O75558	Syntaxin-11 OS=Homo sapiens OX=9606 GN=STX11 PE=1 SV=1	STX11	33.195	29.931	15	4	8	4	1.134	1.557	0.785	1.123	0.898	0.808	1.476	0.887	0.88	0.753	1.089	0.85206	1.136	0.46036	0.532	0.0161991	1.491	0.000175336	1.263	0.075778	1.755	8.1084e-05
O75563	Src kinase-associated phosphoprotein 2 OS=Homo sapiens OX=9606 GN=SKAP2 PE=1 SV=1	SKAP2	41.216	84.401	26.2	10	15	10	1.118	1.815	0.757	1.154	0.705	0.774	1.106	1.06	0.741	0.993	0.957	0.45106	1.204	0.46004	0.684	0.0055168	1.162	0.027259	1.586	0.0025637	1.712	0.00037642
O75569	Interferon-inducible double-stranded RNA-dependent protein kinase activator A OS=Homo sapiens OX=9606 GN=PRKRA PE=1 SV=1	PRKRA	34.404	28.75	13.1	4	4	4	1.159	1.17	1.188	1.068	0.819	1.188	0.999	0.946	0.741	1.004	0.624	0.049363	1.075	0.56372	1.189	0.58164	1.064	0.7704	1.415	0.046259	1.237	0.1921
O75582	Ribosomal protein S6 kinase alpha-5 OS=Homo sapiens OX=9606 GN=RPS6KA5 PE=1 SV=1	RPS6KA5	89.864	7.0676	1.2	1	1	1
O75586	Mediator of RNA polymerase II transcription subunit 6 OS=Homo sapiens OX=9606 GN=MED6 PE=1 SV=2	MED6	28.424	6.089	3.7	1	1	1
O75592	E3 ubiquitin-protein ligase MYCBP2 OS=Homo sapiens OX=9606 GN=MYCBP2 PE=1 SV=4	MYCBP2	513.63	21.573	0.8	3	3	3	1.172	1.049	0.867	0.852	1.142	0.977	1.368	1.013	1.091	0.999	1.117		0.915	0.34956	0.634		0.853		1.026		1.036
O75594	Peptidoglycan recognition protein 1 OS=Homo sapiens OX=9606 GN=PGLYRP1 PE=1 SV=1	PGLYRP1	21.731	20.163	11.7	2	2	2	0.95	1.73	0.716	1.055	1.086	0.961	1.037	0.829	1.104	1.077	1.149	0.44302	1.113	0.65628	0.69	0.059581	0.98	0.76704	0.875	0.5352	2.087	0.0059831
O75608	Acyl-protein thioesterase 1 OS=Homo sapiens OX=9606 GN=LYPLA1 PE=1 SV=1	LYPLA1	24.669	31.14	13.9	3	5	3	0.945	0.912	1.346	0.867	1.224	0.886	1.14	0.907	1.243	1.13	1.403	0.022721	1.005	0.98114	1.181	0.0193419	0.767	0.009685	0.772	0.007119	1.006	0.95484
O75636	Ficolin-3 OS=Homo sapiens OX=9606 GN=FCN3 PE=1 SV=2	FCN3	32.903	19.688	8.4	2	2	2	1.147	1.284	0.632	1.023	1.048	1.194	1.11	0.846	0.812	1.303	0.68		0.89	0.37798	0.569		0.785		1.094		1.518
O75643	U5 small nuclear ribonucleoprotein 200 kDa helicase OS=Homo sapiens OX=9606 GN=SNRNP200 PE=1 SV=2	SNRNP200	244.5	61.144	5	10	11	10	1.092	1.215	0.799	0.826	0.586	1.749	1.402	0.708	0.52	0.994	0.297	0.0048983	0.819	0.54392	0.57	0.045721	0.831	0.134675	1.863	0.05524	1.716	0.0052195
O75648	Mitochondrial tRNA-specific 2-thiouridylase 1 OS=Homo sapiens OX=9606 GN=TRMU PE=1 SV=2	TRMU	47.744	6.0313	3.3	1	1	1
O75663	TIP41-like protein OS=Homo sapiens OX=9606 GN=TIPRL PE=1 SV=2	TIPRL	31.444	56.392	19.9	5	9	5	0.971	1.07	1.434	1.04	1.151	0.883	0.786	1.161	1.209	0.96	1.369	0.0048833	1.158	0.183324	1.824	1.6861e-05	1.083	0.083637	0.844	0.044221	0.922	0.0073995
O75683	Surfeit locus protein 6 OS=Homo sapiens OX=9606 GN=SURF6 PE=1 SV=3	SURF6	41.45	-2	1.9	1	1	1
O75688	Protein phosphatase 1B OS=Homo sapiens OX=9606 GN=PPM1B PE=1 SV=1	PPM1B	52.642	70.468	16.7	7	9	6	1.099	1.241	0.821	1.092	1.092	0.958	0.893	1.082	1.313	0.993	1.371	0.058683	1.109	0.32452	0.919	0.34478	1.1	0.27472	1.006	0.89354	1.147	0.121318
O75695	Protein XRP2 OS=Homo sapiens OX=9606 GN=RP2 PE=1 SV=4	RP2	39.641	19.54	5.4	3	4	3	1.154	1.284	0.863	1.006	1.351	0.5	1.063	1.244	1.146	1.205	2.292	0.125625	1.017	0.75352	0.812	0.28778	0.835	0.33602	0.854	0.47824	1.032	0.78926
O75746	Calcium-binding mitochondrial carrier protein Aralar1 OS=Homo sapiens OX=9606 GN=SLC25A12 PE=1 SV=2	SLC25A12	74.761	74.736	15.3	9	10	7	0.997	0.78	0.65	0.809	0.58	1.977	1.889	0.688	0.374	0.866	0.189	0.00066112	0.602	0.20028	0.344	1.3933e-06	0.934	0.28364	1.719	0.00136377	1.134	0.32344
O75791	GRB2-related adapter protein 2 OS=Homo sapiens OX=9606 GN=GRAP2 PE=1 SV=1	GRAP2	37.909	8.074	3.6	1	1	1	1.429	1.142	0.926	1.059	0.919	1.111	1.087	1.032	0.735	0.84	0.662		1.061	0.75124	0.852		1.261		1.555		1.107
O75792	Ribonuclease H2 subunit A OS=Homo sapiens OX=9606 GN=RNASEH2A PE=1 SV=2	RNASEH2A	33.395	11.701	7	2	2	2	1.184	1.603	0.881	1.021	0.566	0.876	0.998	1.238	0.43	1.377	0.491		1.013	0.92018	0.883		0.741		2.092		1.295
O75821	Eukaryotic translation initiation factor 3 subunit G OS=Homo sapiens OX=9606 GN=EIF3G PE=1 SV=2	EIF3G	35.611	15.013	5.6	2	4	2	1.55	1.236	0.977	0.901	0.443	1.207	0.851	0.802	0.664	1.199	0.55		1.183	0.4426	1.148	0.71098	0.751	0.29808	3.499	0.0113397	1.541	0.144639
O75822	Eukaryotic translation initiation factor 3 subunit J OS=Homo sapiens OX=9606 GN=EIF3J PE=1 SV=2	EIF3J	29.062	75.566	32.2	7	12	7	0.864	0.573	1.039	0.925	0.798	2.193	0.956	0.677	1.337	0.849	0.61	0.00087835	0.866	0.7476	1.087	0.080942	1.09	0.36648	1.083	0.50112	0.846	0.088078
O75828	Carbonyl reductase [NADPH] 3 OS=Homo sapiens OX=9606 GN=CBR3 PE=1 SV=3	CBR3	30.85	-2	17	3	3	1	0.549	0.59	1.578	0.386	0.279	0.426	0.332	0.771		4.806			0.586	0.97464	4.753		0.08		1.968		0.765
O75832	26S proteasome non-ATPase regulatory subunit 10 OS=Homo sapiens OX=9606 GN=PSMD10 PE=1 SV=1	PSMD10	24.428	245.66	41.6	6	15	6	0.869	0.789	1.559	0.948	1.24	0.77	0.875	0.911	1.956	0.975	2.54	9.80771e-13	1.283	0.34188	1.782	4.1186e-07	0.972	0.4548	0.701	3.5233e-05	0.866	0.33392
O75843	AP-1 complex subunit gamma-like 2 OS=Homo sapiens OX=9606 GN=AP1G2 PE=1 SV=1	AP1G2	87.116	18.462	3.7	3	4	3
O75844	CAAX prenyl protease 1 homolog OS=Homo sapiens OX=9606 GN=ZMPSTE24 PE=1 SV=2	ZMPSTE24	54.812	15.971	5.1	3	3	3	1.209	0.71	0.882	0.894	0.638	2.069	1.358	0.614	0.665	0.858	0.321	0.0153369	0.787	0.57784	0.649	0.030997	1.042	0.52358	1.895	0.22776	1.156	0.34668
O75874	Isocitrate dehydrogenase [NADP] cytoplasmic OS=Homo sapiens OX=9606 GN=IDH1 PE=1 SV=2	IDH1	46.659	146.4	26.6	11	21	11	0.721	0.694	1.241	1.208	1.371	1.321	1.203	0.821	1.555	0.624	1.177	0.036503	1.015	0.96928	1.032	0.23888	1.936	3.2554e-11	0.526	4.1645e-11	0.845	0.0072224
O75886	Signal transducing adapter molecule 2 OS=Homo sapiens OX=9606 GN=STAM2 PE=1 SV=1	STAM2	58.164	17.506	6.3	3	4	2	1.012	1.788	0.995	1.071	0.682	0.942	0.857	1.178	0.611	1.105	0.649		1.15	0.6257	1.161		0.969		1.484		1.518
O75891	Cytosolic 10-formyltetrahydrofolate dehydrogenase OS=Homo sapiens OX=9606 GN=ALDH1L1 PE=1 SV=2	ALDH1L1	98.828	17.516	6.5	6	8	2	1.514	0.338	0.809	1.411	0.505	1.574	1.614	0.683	0.322	1.136	0.205		0.797	0.43584	0.501		1.242		2.998		0.495
O75912	Diacylglycerol kinase iota OS=Homo sapiens OX=9606 GN=DGKI PE=1 SV=1	DGKI	117	-2	0.8	1	1	1
O75915	PRA1 family protein 3 OS=Homo sapiens OX=9606 GN=ARL6IP5 PE=1 SV=1	ARL6IP5	21.614	8.6193	5.9	1	2	1	1.517	1.449	0.995	0.886	0.802	0.997	1.072	0.925	0.536	1.012	0.538	0.133343	1.12	0.80482	0.928	0.48034	0.875	0.022203	1.892	0.035317	1.566	0.0116629
O75923	Dysferlin OS=Homo sapiens OX=9606 GN=DYSF PE=1 SV=1	DYSF	237.29	179.42	12.3	23	28	22	1.206	1.896	0.591	1.294	0.813	0.878	1.009	0.712	0.778	0.963	0.886	0.33566	1.318	0.3955	0.586	7.9636e-09	1.344	5.924e-10	1.483	6.8625e-08	2.663	4.70735e-14
O75934	Pre-mRNA-splicing factor SPF27 OS=Homo sapiens OX=9606 GN=BCAS2 PE=1 SV=1	BCAS2	26.131	13.704	12	2	2	2
O75935	Dynactin subunit 3 OS=Homo sapiens OX=9606 GN=DCTN3 PE=1 SV=1	DCTN3	21.119	26.08	19.4	4	9	4	0.769	0.93	0.934	1.363	1.048	0.94	1.326	1.124	1.354	0.919	1.44	0.00117967	0.999	0.89418	0.704	0.00060348	1.483	3.6422e-05	0.734	0.0048174	0.827	0.02484
O75936	Gamma-butyrobetaine dioxygenase OS=Homo sapiens OX=9606 GN=BBOX1 PE=1 SV=1	BBOX1	44.714	6.9994	2.6	1	1	1	0.66	3.281	0.697	0.835	1.049	0.589	0.716	0.711	1.351	0.718	2.294		1.804	0.26622	0.973		1.163		0.629		4.615
O75940	Survival of motor neuron-related-splicing factor 30 OS=Homo sapiens OX=9606 GN=SMNDC1 PE=1 SV=1	SMNDC1	26.711	6.3361	5	1	1	1
O75947	ATP synthase subunit d, mitochondrial OS=Homo sapiens OX=9606 GN=ATP5H PE=1 SV=3	ATP5H	18.491	74.443	41	8	11	8	1.093	0.746	1.186	0.758	0.599	1.34	1.848	0.764	0.431	0.984	0.322	0.00056483	0.761	0.37444	0.642	0.0052365	0.77	0.0085392	1.825	0.003319	0.976	0.40388
O75955	Flotillin-1 OS=Homo sapiens OX=9606 GN=FLOT1 PE=1 SV=3	FLOT1	47.355	175.5	33.7	12	31	12	0.739	0.691	0.901	1.63	1.081	1.031	1.153	0.539	2.21	0.827	2.144	3.1613e-11	1.333	0.45106	0.781	0.0011754	1.971	1.62725e-12	0.684	8.0738e-08	1.282	0.0194198
O75964	ATP synthase subunit g, mitochondrial OS=Homo sapiens OX=9606 GN=ATP5L PE=1 SV=3	ATP5L	11.428	40.293	36.9	4	8	4	1.076	0.888	1.129	0.738	0.622	1.604	1.58	0.756	0.439	1.034	0.274	0.021357	0.763	0.35392	0.715	0.0086605	0.714	0.0193376	1.73	0.083057	1.175	0.154378
O75976	Carboxypeptidase D OS=Homo sapiens OX=9606 GN=CPD PE=1 SV=2	CPD	152.93	11.711	1.5	2	2	2	1.67	1.275	0.798	0.951	1.046	1.038	0.976	0.795	0.663	1.136	0.639	0.179616	1.073	0.90086	0.818	0.037021	0.837	0.23942	1.597	0.2636	1.604	0.097345
O75995	SAM and SH3 domain-containing protein 3 OS=Homo sapiens OX=9606 GN=SASH3 PE=1 SV=2	SASH3	41.595	21.675	8.9	3	5	3	1.086	1.131	0.729	1.108	0.686	1.871	0.938	0.96	0.578	0.886	0.309	0.067324	0.867	0.60456	0.777	0.20532	1.251	0.3879	1.583	0.023656	1.178	0.70796
O76003	Glutaredoxin-3 OS=Homo sapiens OX=9606 GN=GLRX3 PE=1 SV=2	GLRX3	37.432	52.44	17.3	7	16	7	0.674	0.738	1.536	0.845	1.572	0.779	0.906	1.075	2.133	0.92	2.738	4.2513e-11	1.128	0.86308	1.695	2.7429e-07	0.918	0.28314	0.429	1.2957e-10	0.687	4.2147e-05
O76021	Ribosomal L1 domain-containing protein 1 OS=Homo sapiens OX=9606 GN=RSL1D1 PE=1 SV=3	RSL1D1	54.972	-2	1.6	1	1	1
O76024	Wolframin OS=Homo sapiens OX=9606 GN=WFS1 PE=1 SV=2	WFS1	100.29	7.379	1.2	1	1	1	1.108	0.601	1.893	1.22	0.778	1.365	1.13	0.708	0.223	1.041	0.163		1.005	0.63956	1.675		1.172		1.424		0.849
O76031	ATP-dependent Clp protease ATP-binding subunit clpX-like, mitochondrial OS=Homo sapiens OX=9606 GN=CLPX PE=1 SV=2	CLPX	69.223	40.455	9.6	5	6	5	0.867	0.815	1.223	0.927	0.822	1.341	1.166	0.837	0.764	1.587	0.57		0.799	0.21692	1.049		0.584		1.055		0.974
O76054	SEC14-like protein 2 OS=Homo sapiens OX=9606 GN=SEC14L2 PE=1 SV=1	SEC14L2	46.145	28.05	10.4	4	5	4	1.064	0.7	1.097	0.723	2.028	0.709	0.861	1.198	1.435	1.373	2.024	0.0033427	0.814	0.46468	1.274	0.193916	0.527	0.046824	0.525	0.037558	0.584	0.043745
O76071	Probable cytosolic iron-sulfur protein assembly protein CIAO1 OS=Homo sapiens OX=9606 GN=CIAO1 PE=1 SV=1	CIAO1	37.84	54.916	16.8	5	5	5	0.974	1.194	1.033	0.751	1.326	1.113	0.863	1.084	1.328	1.049	1.193	0.0156965	0.971	0.75814	1.197	0.26652	0.716	0.056222	0.735	0.179556	1.101	0.32682
O76094	Signal recognition particle subunit SRP72 OS=Homo sapiens OX=9606 GN=SRP72 PE=1 SV=3	SRP72	74.605	115.63	17.9	12	18	12	1.378	1.06	1.012	0.763	0.545	1.865	0.846	0.916	0.397	1.172	0.213	2.728e-09	0.863	0.635	1.196	0.043844	0.651	4.4639e-05	2.528	3.837e-09	1.157	0.10002
O76095	Protein JTB OS=Homo sapiens OX=9606 GN=JTB PE=1 SV=1	JTB	16.358	12.505	8.9	1	1	1	1.402	0.975	1.427	0.691	0.676	1.302	0.905	1.397	0.266	0.961	0.204		0.908	0.53438	1.577		0.719		2.074		0.698
O94760	N(G),N(G)-dimethylarginine dimethylaminohydrolase 1 OS=Homo sapiens OX=9606 GN=DDAH1 PE=1 SV=3	DDAH1	31.121	-2	3.2	1	1	1	1.805	1.243	0.46	0.825	0.518	1.894	0.79	0.88	0.452	0.965	0.239		0.948	0.76286	0.582		0.855		3.485		1.412
O94768	Serine/threonine-protein kinase 17B OS=Homo sapiens OX=9606 GN=STK17B PE=1 SV=1	STK17B	42.344	7.2623	2.4	1	1	1	1.429	1.516	0.394	1.069	0.709	1.382	0.934	1.052	0.546	1.046	0.395		0.967	0.63962	0.422		1.022		2.016		1.441
O94776	Metastasis-associated protein MTA2 OS=Homo sapiens OX=9606 GN=MTA2 PE=1 SV=1	MTA2	75.022	50.074	8.7	6	7	5	0.998	1.309	0.813	0.887	0.74	1.513	1.13	0.889	0.575	0.943	0.38	0.02548	0.879	0.4788	0.719	0.067156	0.941	0.25386	1.349	0.158823	1.472	0.00139676
O94804	Serine/threonine-protein kinase 10 OS=Homo sapiens OX=9606 GN=STK10 PE=1 SV=1	STK10	112.13	118.81	14.3	14	18	12	1.131	1.236	0.672	1.357	0.855	1.387	1.209	0.825	0.77	0.863	0.555	0.00023761	1.005	0.9652	0.556	1.1325e-07	1.572	1.63662e-05	1.323	0.0021823	1.498	0.0030215
O94813	Slit homolog 2 protein OS=Homo sapiens OX=9606 GN=SLIT2 PE=1 SV=1	SLIT2	169.87	-2	0.6	1	1	1	0.806	1.418	0.963	1.103	1.484	0.699	1.029	1.177	1.145	0.96	1.638		1.016	0.85948	0.936		1.149		0.543		1.205
O94819	Kelch repeat and BTB domain-containing protein 11 OS=Homo sapiens OX=9606 GN=KBTBD11 PE=1 SV=1	KBTBD11	65.719	7.2977	2.4	1	1	1
O94826	Mitochondrial import receptor subunit TOM70 OS=Homo sapiens OX=9606 GN=TOMM70 PE=1 SV=1	TOMM70	67.454	56.512	13.8	7	10	7	1.15	0.742	1.009	0.953	0.513	1.468	1.395	0.638	0.382	1.504	0.26	0.0177005	0.768	0.46328	0.723	0.0096243	0.634	0.022541	2.242	0.02054	1.163	0.65612
O94829	Importin-13 OS=Homo sapiens OX=9606 GN=IPO13 PE=1 SV=3	IPO13	108.19	7.5874	1.5	1	1	1
O94832	Unconventional myosin-Id OS=Homo sapiens OX=9606 GN=MYO1D PE=1 SV=2	MYO1D	116.2	11.375	1.7	2	2	2
O94855	Protein transport protein Sec24D OS=Homo sapiens OX=9606 GN=SEC24D PE=1 SV=2	SEC24D	113.01	55.839	9.2	7	9	7	1.267	1.123	1.108	0.9	0.62	1.683	0.896	0.829	0.441	1.091	0.262	0.032241	0.945	0.81684	1.237	0.32208	0.825	0.120563	2.044	0.114102	1.355	0.0067847
O94874	E3 UFM1-protein ligase 1 OS=Homo sapiens OX=9606 GN=UFL1 PE=1 SV=2	UFL1	89.594	142.6	16.8	13	16	13	1.225	0.739	1.181	0.752	0.538	1.963	0.944	0.868	0.466	1.14	0.237	6.7201e-07	0.8	0.5012	1.251	0.0036448	0.66	1.5064e-05	2.277	2.569e-06	0.851	0.166757
O94889	Kelch-like protein 18 OS=Homo sapiens OX=9606 GN=KLHL18 PE=1 SV=3	KLHL18	63.638	19.263	4.9	3	3	3
O94903	Pyridoxal phosphate homeostasis protein OS=Homo sapiens OX=9606 GN=PLPBP PE=1 SV=1	PLPBP	30.344	13.466	9.1	2	3	2	1.001	0.909	1.145	0.93	1.446	1.043	0.942	0.983	1.077	1.253	1.033		0.893	0.29164	1.215		0.742		0.692		0.925
O94905	Erlin-2 OS=Homo sapiens OX=9606 GN=ERLIN2 PE=1 SV=1	ERLIN2	37.839	70.756	18.9	6	11	5	0.969	1.002	1.125	0.855	0.803	1.375	1.05	0.783	0.591	1.173	0.43	0.0127962	0.876	0.42178	1.071	0.90134	0.729	0.25816	1.207	0.034741	1.28	0.097644
O94906	Pre-mRNA-processing factor 6 OS=Homo sapiens OX=9606 GN=PRPF6 PE=1 SV=1	PRPF6	106.92	12.025	1.8	2	2	2	1.169	1.221	0.813	0.985	0.677	1.592	1.068	0.953	0.509	1.022	0.32		0.884	0.54858	0.761		0.964		1.727		1.281
O94915	Protein furry homolog-like OS=Homo sapiens OX=9606 GN=FRYL PE=1 SV=2	FRYL	339.59	25.594	1.3	4	4	4	1.297	1.425	0.738	1.256	0.758	1.146	0.927	1.027	0.781	1.019	0.682	0.071158	1.127	0.56624	0.796	0.032978	1.233	0.004099	1.711	0.0178991	1.388	0.0081232
O94919	Endonuclease domain-containing 1 protein OS=Homo sapiens OX=9606 GN=ENDOD1 PE=1 SV=2	ENDOD1	55.016	49.635	12	5	7	5	0.926	1.201	0.649	1.307	1.301	0.771	1.228	0.786	1.682	0.838	2.182	0.000196849	1.171	0.5175	0.529	0.0097394	1.56	0.0094763	0.712	0.0106627	1.528	0.0038401
O94925	Glutaminase kidney isoform, mitochondrial OS=Homo sapiens OX=9606 GN=GLS PE=1 SV=1	GLS	73.46	47.64	8.5	4	5	4	1.027	1.33	0.59	1.046	0.598	1.203	1.183	0.937	0.817	1.339	0.679	0.113283	0.914	0.67086	0.499	0.0196752	0.781	0.28526	1.717	0.25882	1.419	0.90648
O94973	AP-2 complex subunit alpha-2 OS=Homo sapiens OX=9606 GN=AP2A2 PE=1 SV=2	AP2A2	103.96	136.63	14.3	12	17	10	1.001	1.195	0.858	0.995	1.004	1.135	1.147	0.965	1.005	0.879	0.885	0.69094	0.985	0.83714	0.748	0.00058357	1.132	0.070295	0.997	0.51224	1.238	0.167218
O94979	Protein transport protein Sec31A OS=Homo sapiens OX=9606 GN=SEC31A PE=1 SV=3	SEC31A	133.01	81.085	8.9	11	13	11	1.25	0.837	1.016	0.768	0.734	1.544	1.047	0.969	0.583	1.26	0.378	0.00024124	0.802	0.25044	0.97	0.43388	0.61	0.00050056	1.703	0.0037417	0.864	0.39694
O95139	NADH dehydrogenase [ubiquinone] 1 beta subcomplex subunit 6 OS=Homo sapiens OX=9606 GN=NDUFB6 PE=1 SV=3	NDUFB6	15.489	10.276	14.1	1	1	1	1.137	1.275	0.925	1.218	0.658	1.226	1.642	0.488	0.267	1.133	0.218		0.937	0.78494	0.563		1.075		1.728		2.613
O95140	Mitofusin-2 OS=Homo sapiens OX=9606 GN=MFN2 PE=1 SV=3	MFN2	86.401	25.55	4.2	3	3	3	1.214	1.372	0.775	0.997	0.793	1.183	1.043	0.969	0.611	1.274	0.516	0.057276	0.944	0.62482	0.743	0.123602	0.783	0.0060557	1.531	0.078658	1.416	0.0153035
O95155	Ubiquitin conjugation factor E4 B OS=Homo sapiens OX=9606 GN=UBE4B PE=1 SV=1	UBE4B	146.18	41.761	5.1	6	6	6	0.903	1.3	0.903	0.993	0.938	1.028	0.762	0.875	1.052	1.019	1.023	0.64018	1.114	0.262	1.185	0.4042	0.974	0.371	0.963	0.3635	1.486	0.43774
O95163	Elongator complex protein 1 OS=Homo sapiens OX=9606 GN=ELP1 PE=1 SV=3	ELP1	150.25	35.21	2.3	2	2	2	1.058	1.336	1.037	0.878	1.091	1.278	0.865	1.002	0.728	1.077	0.57		0.948	0.59728	1.199		0.815		0.97		1.333
O95166	Gamma-aminobutyric acid receptor-associated protein OS=Homo sapiens OX=9606 GN=GABARAP PE=1 SV=1	GABARAP	13.918	6.9323	9.4	1	2	1	0.985	1.611	0.803	1.247	1.052	0.813	0.89	1.118	1.019	1.03	1.253		1.155	0.37886	0.902		1.211		0.936		1.441
O95168	NADH dehydrogenase [ubiquinone] 1 beta subcomplex subunit 4 OS=Homo sapiens OX=9606 GN=NDUFB4 PE=1 SV=3	NDUFB4	15.208	51.733	31	3	3	3	1.203	1.141	0.647	1.052	0.786	1.256	1.416	0.868	0.674	1.144	0.537	0.0093793	0.862	0.3896	0.457	0.081415	0.92	0.64582	1.531	0.0048385	1.315	0.23966
O95169	NADH dehydrogenase [ubiquinone] 1 beta subcomplex subunit 8, mitochondrial OS=Homo sapiens OX=9606 GN=NDUFB8 PE=1 SV=1	NDUFB8	21.766	27.597	16.1	3	3	3	1.369	1.136	0.665	1.097	0.493	1.393	1.528	0.626	0.418	1.217	0.3		0.891	0.74828	0.435		0.901		2.777		1.815
O95182	NADH dehydrogenase [ubiquinone] 1 alpha subcomplex subunit 7 OS=Homo sapiens OX=9606 GN=NDUFA7 PE=1 SV=3	NDUFA7	12.551	45.276	28.3	3	4	3	1	1.042	0.569	1.115	0.684	1.54	1.385	0.76	0.614	1.403	0.399	0.0051598	0.752	0.26264	0.411	0.0079157	0.795	0.28296	1.462	0.20686	1.371	0.114145
O95197	Reticulon-3 OS=Homo sapiens OX=9606 GN=RTN3 PE=1 SV=2	RTN3	112.61	7.8072	1.1	1	2	1	1.042	1.364	1.196	0.989	1.237	0.987	0.998	0.976	0.857	0.838	0.868	0.54066	1.082	0.48686	1.198	0.5187	1.18	0.25796	0.842	0.26988	1.398	0.164017
O95202	Mitochondrial proton/calcium exchanger protein OS=Homo sapiens OX=9606 GN=LETM1 PE=1 SV=1	LETM1	83.353	106.28	14.5	9	14	9	0.536	0.381	0.868	0.453	0.398	4.055	0.894	0.321	0.374	0.854	0.092	2.8216e-09	0.4	0.30578	0.971	0.79116	0.53	2.5657e-06	1.347	0.023877	1.187	0.29318
O95210	Starch-binding domain-containing protein 1 OS=Homo sapiens OX=9606 GN=STBD1 PE=1 SV=1	STBD1	39.007	6.331	3.1	1	1	1	0.922	1.066	1.218	0.747	1.257	0.695	0.934	1.52	1.004	1.367	1.445		0.859	0.46092	1.304		0.546		0.733		0.701
O95218	Zinc finger Ran-binding domain-containing protein 2 OS=Homo sapiens OX=9606 GN=ZRANB2 PE=1 SV=2	ZRANB2	37.404	7.6246	2.7	1	1	1	0.9	0.643	1.23	0.917	0.506	2.206	1.28	0.699	0.323	1.037	0.146		0.701	0.37818	0.961		0.884		1.779		0.92
O95232	Luc7-like protein 3 OS=Homo sapiens OX=9606 GN=LUC7L3 PE=1 SV=2	LUC7L3	51.466	25.194	6.2	2	2	2	1.115	1.021	0.943	0.944	0.884	1.551	1.462	0.637	0.787	0.79	0.507		0.903	0.80492	0.645		1.195		1.261		1.603
O95236	Apolipoprotein L3 OS=Homo sapiens OX=9606 GN=APOL3 PE=1 SV=3	APOL3	44.278	23.807	7	3	3	3	0.901	0.786	1.728	0.956	1.328	0.792	1.179	0.931	1.354	0.842	1.71	0.081721	1.129	0.59312	1.466	0.31704	1.135	0.62534	0.678	0.06218	0.844	0.66998
O95248	Myotubularin-related protein 5 OS=Homo sapiens OX=9606 GN=SBF1 PE=1 SV=4	SBF1	208.44	35.163	2.2	4	4	4	1.008	1.116	0.842	1.221	0.985	1.201	1.133	1.013	0.754	1.072	0.628	0.021717	0.914	0.31624	0.743	0.17664	1.139	0.034598	1.023	0.88338	1.102	0.56848
O95249	Golgi SNAP receptor complex member 1 OS=Homo sapiens OX=9606 GN=GOSR1 PE=1 SV=1	GOSR1	28.612	7.2333	3.6	1	1	1
O95260	Arginyl-tRNA--protein transferase 1 OS=Homo sapiens OX=9606 GN=ATE1 PE=1 SV=2	ATE1	59.09	20.906	5.4	3	3	3	1.119	1.325	0.764	1.175	0.76	1.331	0.998	1.082	0.642	0.973	0.482		0.977	0.79822	0.766		1.208		1.472		1.225
O95298	NADH dehydrogenase [ubiquinone] 1 subunit C2 OS=Homo sapiens OX=9606 GN=NDUFC2 PE=1 SV=1	NDUFC2	14.187	18.993	23.5	3	5	3	1.165	1.02	0.933	0.997	0.571	1.511	1.536	0.641	0.505	1.144	0.334	0.000199213	0.855	0.67646	0.607	0.00071547	0.872	0.110783	2.04	0.0076566	1.591	0.029899
O95299	NADH dehydrogenase [ubiquinone] 1 alpha subcomplex subunit 10, mitochondrial OS=Homo sapiens OX=9606 GN=NDUFA10 PE=1 SV=1	NDUFA10	40.75	44.907	16.1	6	12	6	1.282	1.117	0.828	0.923	0.458	1.424	1.383	0.808	0.412	1.392	0.289	2.0626e-08	0.835	0.6005	0.599	9.0007e-08	0.663	3.1222e-06	2.799	2.5517e-06	1.382	0.0011954
O95319	CUGBP Elav-like family member 2 OS=Homo sapiens OX=9606 GN=CELF2 PE=1 SV=1	CELF2	54.284	21.617	6.7	3	4	3	1.48	1.261	0.926	0.684	0.807	1.315	0.827	0.957	0.534	1.125	0.406	0.086843	0.971	0.71072	1.12	0.159299	0.608	0.3293	1.834		1.318	0.51932
O95336	6-phosphogluconolactonase OS=Homo sapiens OX=9606 GN=PGLS PE=1 SV=2	PGLS	27.547	70.095	38	7	10	7	0.905	0.978	1.412	0.845	1.867	0.459	0.658	1.172	1.636	1.097	3.564	1.98736e-05	1.1	0.54688	2.146	0.00031665	0.77	0.0185637	0.485	0.00199514	0.834	0.133677
O95340	Bifunctional 3'-phosphoadenosine 5'-phosphosulfate synthase 2 OS=Homo sapiens OX=9606 GN=PAPSS2 PE=1 SV=2	PAPSS2	69.5	49.771	10.4	5	5	5	0.544	0.54	2.696	0.465	0.491	2.554	0.589	0.616	0.509	0.776	0.199	0.131324	0.946	0.78328	4.577	0.118838	0.599	0.4195	1.108	0.77682	0.877	0.85258
O95347	Structural maintenance of chromosomes protein 2 OS=Homo sapiens OX=9606 GN=SMC2 PE=1 SV=2	SMC2	135.65	132.06	14.1	16	17	16	1.264	1.137	0.781	1.133	1.119	1.014	0.96	1.022	1.084	1.06	1.069	0.34588	1.043	0.73506	0.814	0.0059399	1.069	0.148739	1.13	0.047278	1.113	0.26652
O95352	Ubiquitin-like modifier-activating enzyme ATG7 OS=Homo sapiens OX=9606 GN=ATG7 PE=1 SV=1	ATG7	77.959	189.29	24.5	14	20	14	0.79	1.306	0.983	1.086	1.289	0.73	1.08	1.128	1.182	0.944	1.619	2.2156e-06	1.034	0.78204	0.91	0.23816	1.15	0.109525	0.613	8.3935e-09	1.158	0.00135759
O95363	Phenylalanine--tRNA ligase, mitochondrial OS=Homo sapiens OX=9606 GN=FARS2 PE=1 SV=1	FARS2	52.356	29.828	7.3	3	3	3
O95372	Acyl-protein thioesterase 2 OS=Homo sapiens OX=9606 GN=LYPLA2 PE=1 SV=1	LYPLA2	24.737	18.731	14.7	3	6	3	0.994	1.049	1.307	0.895	1.09	0.973	0.941	1.071	1.235	0.924	1.269	0.063078	1.096	0.30762	1.389	0.040944	0.969	0.30072	0.912	0.148641	0.979	0.62226
O95373	Importin-7 OS=Homo sapiens OX=9606 GN=IPO7 PE=1 SV=1	IPO7	119.52	196.61	10.2	9	16	9	0.786	0.877	1.001	1.049	1.482	0.947	1.023	1.132	1.463	0.988	1.545	0.000121098	0.929	0.54692	0.978	0.75714	1.062	0.166304	0.53	9.2658e-08	0.775	0.0096832
O95376	E3 ubiquitin-protein ligase ARIH2 OS=Homo sapiens OX=9606 GN=ARIH2 PE=1 SV=1	ARIH2	57.818	127.26	20.3	9	16	9	0.961	0.975	1.089	1.076	1.297	0.994	0.98	1.093	1.439	0.889	1.448	0.0035617	1.055	0.61588	1.111	0.72962	1.21	0.192903	0.741	0.000184667	0.892	0.17542
O95379	Tumor necrosis factor alpha-induced protein 8 OS=Homo sapiens OX=9606 GN=TNFAIP8 PE=1 SV=1	TNFAIP8	23.003	24.087	15.7	3	5	3	1.233	1.196	0.936	1.114	1.109	0.925	0.964	1.232	0.896	0.887	0.969	0.75436	1.05	0.59994	0.971	0.97852	1.256	0.24886	1.112	0.95368	0.971	0.76354
O95394	Phosphoacetylglucosamine mutase OS=Homo sapiens OX=9606 GN=PGM3 PE=1 SV=1	PGM3	59.851	52.211	13.3	7	8	7	1.464	1.094	1.208	0.803	0.81	1.374	0.644	1.028	0.743	1.233	0.541	0.020085	1.044	0.8048	1.876	0.0086965	0.651	0.0186602	1.807	0.0025641	1.064	0.7678
O95425	Supervillin OS=Homo sapiens OX=9606 GN=SVIL PE=1 SV=2	SVIL	247.74	45.404	2.3	4	4	4	1.152	2.148	0.629	1.364	0.552	0.83	0.972	1.095	0.357	0.974	0.43		1.277	0.78748	0.647		1.4		2.087		1.962
O95433	Activator of 90 kDa heat shock protein ATPase homolog 1 OS=Homo sapiens OX=9606 GN=AHSA1 PE=1 SV=1	AHSA1	38.274	49.452	15.1	5	7	5	1.005	0.965	1.528	0.801	1.187	0.861	0.797	1.087	1.604	1.046	1.863	5.2597e-07	1.186	0.38018	1.917	1.4423e-07	0.766	0.0002385	0.847	0.087236	0.888	0.026523
O95456	Proteasome assembly chaperone 1 OS=Homo sapiens OX=9606 GN=PSMG1 PE=1 SV=1	PSMG1	32.854	49.006	8.3	2	4	2	0.867	1.002	1.254	1.042	1.45	0.918	0.92	1.074	1.362	0.83	1.484	0.007939	1.065	0.59792	1.363	0.0082826	1.255	0.035295	0.598	0.000141533	0.933	0.70116
O95466	Formin-like protein 1 OS=Homo sapiens OX=9606 GN=FMNL1 PE=1 SV=3	FMNL1	121.85	99.683	11.7	13	14	13	1.125	1.575	0.807	1.258	0.726	1.116	0.94	0.958	0.635	0.931	0.569	1.91684e-05	1.156	0.57032	0.859	0.051338	1.351	0.000102999	1.55	0.00048211	1.644	6.1007e-05
O95479	GDH/6PGL endoplasmic bifunctional protein OS=Homo sapiens OX=9606 GN=H6PD PE=1 SV=2	H6PD	88.892	39.409	6.7	5	6	5	1.32	1.595	0.799	0.93	0.916	0.758	0.789	1.578	0.737	1.003	0.972	0.92178	1.067	0.78078	1.013	0.90696	0.927	0.9665	1.441	0.0032405	1.011	0.52404
O95486	Protein transport protein Sec24A OS=Homo sapiens OX=9606 GN=SEC24A PE=1 SV=2	SEC24A	119.75	29.795	3.3	4	4	4	1.571	0.738	1.632	0.728	0.874	1.25	0.889	1.12	0.509	0.871	0.407	0.052797	1.035	0.81052	1.836	0.2742	0.836	0.37216	1.797	0.068159	0.659	0.20208
O95487	Protein transport protein Sec24B OS=Homo sapiens OX=9606 GN=SEC24B PE=1 SV=2	SEC24B	137.42	12.47	1.3	2	2	2
O95498	Vascular non-inflammatory molecule 2 OS=Homo sapiens OX=9606 GN=VNN2 PE=1 SV=3	VNN2	58.502	5.9707	2.5	1	1	1	1.169	1.369	0.686	1.233	0.672	0.776	1.262	1.32	0.994	0.897	1.281		1.106	0.5596	0.544		1.375		1.74		1.037
O95544	NAD kinase OS=Homo sapiens OX=9606 GN=NADK PE=1 SV=1	NADK	49.228	32.004	10.5	4	4	4	1.162	1.634	0.798	1.173	0.938	0.722	0.963	1.129	0.796	0.955	1.102	0.46468	1.182	0.3892	0.829	0.20004	1.228	0.020558	1.239	0.105701	1.447	0.022082
O95551	Tyrosyl-DNA phosphodiesterase 2 OS=Homo sapiens OX=9606 GN=TDP2 PE=1 SV=1	TDP2	40.929	20.702	8.6	3	4	3	1.288	1.357	1.167	0.975	0.834	0.99	0.951	0.928	0.808	1.057	0.816	0.43108	1.175	0.191738	1.227	0.31778	0.922	0.3675	1.544	0.09436	1.462	0.055137
O95563	Mitochondrial pyruvate carrier 2 OS=Homo sapiens OX=9606 GN=MPC2 PE=1 SV=1	MPC2	14.279	10.899	12.6	2	3	2	1.024	0.793	0.737	0.897	0.657	2.176	1.077	0.899	0.695	0.984	0.319	0.076581	0.716	0.25106	0.684	0.0159361	0.912	0.5429	1.559	0.160539	0.882	0.28754
O95571	Persulfide dioxygenase ETHE1, mitochondrial OS=Homo sapiens OX=9606 GN=ETHE1 PE=1 SV=2	ETHE1	27.873	37.002	16.5	4	7	4	0.878	1.182	0.732	0.967	0.906	0.923	2.15	0.911	0.666	0.889	0.722	0.0889	0.766	0.30796	0.34	0.0105222	1.088	0.61078	0.969	0.5962	1.297	0.138478
O95573	Long-chain-fatty-acid--CoA ligase 3 OS=Homo sapiens OX=9606 GN=ACSL3 PE=1 SV=3	ACSL3	80.419	43.098	9	6	7	5	1.05	0.992	0.856	1.102	1.121	1.135	1.057	1.098	0.976	1.128	0.86	0.1845	0.898	0.068162	0.81	0.098275	0.977	0.87268	0.937	0.49774	0.903	0.42412
O95630	STAM-binding protein OS=Homo sapiens OX=9606 GN=STAMBP PE=1 SV=1	STAMBP	48.076	88.484	14.9	5	12	5	1.029	0.769	1.166	0.991	1.405	0.754	1.048	1.126	1.659	0.831	2.2	2.7416e-06	1.087	0.66312	1.113	0.074977	1.193	0.136075	0.732	0.022358	0.683	0.00052405
O95639	Cleavage and polyadenylation specificity factor subunit 4 OS=Homo sapiens OX=9606 GN=CPSF4 PE=1 SV=1	CPSF4	30.255	13.48	12.3	2	3	2	0.507	0.758	0.722		0.985	1.881	0.868	0.894		1.278			0.561	0.042495	0.832				0.515		0.848
O95671	N-acetylserotonin O-methyltransferase-like protein OS=Homo sapiens OX=9606 GN=ASMTL PE=1 SV=3	ASMTL	68.856	69.643	8.5	4	4	4	1.402	1.586	1.127	0.962	0.72	1.318	0.712	0.747	0.5	1.036	0.379	0.0114821	1.23	0.49994	1.583	0.0056849	0.929	0.51018	1.947	0.00176176	2.123	0.016541
O95674	Phosphatidate cytidylyltransferase 2 OS=Homo sapiens OX=9606 GN=CDS2 PE=1 SV=1	CDS2	51.417	15.268	8.5	2	2	2
O95685	Protein phosphatase 1 regulatory subunit 3D OS=Homo sapiens OX=9606 GN=PPP1R3D PE=1 SV=1	PPP1R3D	32.559	14.565	7.7	2	2	2
O95714	E3 ubiquitin-protein ligase HERC2 OS=Homo sapiens OX=9606 GN=HERC2 PE=1 SV=2	HERC2	527.22	12.351	0.4	2	2	2
O95716	Ras-related protein Rab-3D OS=Homo sapiens OX=9606 GN=RAB3D PE=1 SV=1	RAB3D	24.267	28.296	16.4	4	4	3	1.091	2.421	0.522	1.207	0.703	0.722	0.962	1.043	0.493	1.088	0.683	0.2722	1.269	0.81204	0.543	0.0115364	1.109	0.43836	1.552	0.00026105	2.321	0.00065759
O95721	Synaptosomal-associated protein 29 OS=Homo sapiens OX=9606 GN=SNAP29 PE=1 SV=1	SNAP29	28.97	78.129	20.2	4	6	4	1.338	1.281	0.768	1.071	0.662	1.295	0.97	0.983	0.937	1.085	0.724	0.0142576	1.08	0.6102	0.792	0.0048423	0.987	0.67464	2.021	0.00027571	1.303	0.038942
O95747	Serine/threonine-protein kinase OSR1 OS=Homo sapiens OX=9606 GN=OXSR1 PE=1 SV=1	OXSR1	58.022	159.97	27.1	12	25	9	0.868	0.936	1.157	1.029	1.392	0.754	0.912	1.13	1.665	1.037	2.208	0.0049238	1.082	0.65034	1.269	0.01086	0.992	0.69438	0.624	0.0056801	0.828	0.36984
O95757	Heat shock 70 kDa protein 4L OS=Homo sapiens OX=9606 GN=HSPA4L PE=1 SV=3	HSPA4L	94.511	52.944	12.2	9	13	7	0.914	1.48	0.811	1.384	0.877	0.77	0.85	1.157	1.097	1.175	1.425	0.00084125	1.177	0.32306	0.954	0.39764	1.178	0.033041	1.042	0.21506	1.279	0.0140425
O95758	Polypyrimidine tract-binding protein 3 OS=Homo sapiens OX=9606 GN=PTBP3 PE=1 SV=2	PTBP3	59.689	13.338	3.3	2	2	2	1.691	1.022	1.435	0.883	0.738	1.245	0.97	0.666	0.654	0.861	0.525	0.037381	1.269	0.33736	1.479	0.089858	1.026	0.86328	2.291	0.106536	1.535	0.172741
O95782	AP-2 complex subunit alpha-1 OS=Homo sapiens OX=9606 GN=AP2A1 PE=1 SV=3	AP2A1	107.54	298.69	25.5	24	59	22	0.928	1.131	1.009	1.051	1.348	1.091	1.057	1.023	1.129	0.895	1.035	0.025317	0.969	0.7513	0.955	0.91984	1.174	5.5289e-08	0.688	1e-32	1.106	0.23884
O95786	Probable ATP-dependent RNA helicase DDX58 OS=Homo sapiens OX=9606 GN=DDX58 PE=1 SV=2	DDX58	106.6	54.466	8.6	8	9	8	1.129	1.228	1.09	1.014	1.684	0.72	1.158	0.803	0.634	0.957	0.881	0.96432	0.957	0.91478	0.941	0.20776	1.06	0.6032	0.67	0.35178	1.529	0.21276
O95793	Double-stranded RNA-binding protein Staufen homolog 1 OS=Homo sapiens OX=9606 GN=STAU1 PE=1 SV=2	STAU1	63.182	13.775	3.6	2	2	2
O95810	Caveolae-associated protein 2 OS=Homo sapiens OX=9606 GN=CAVIN2 PE=1 SV=3	CAVIN2	47.173	42.247	10.1	4	6	4	1.283	1.002	0.644	1.06	0.895	1.018	2.134	0.733	0.565	0.771	0.555	0.032059	0.82	0.53998	0.302	0.000122149	1.375	0.0107153	1.434	0.0115983	1.367	0.0034779
O95816	BAG family molecular chaperone regulator 2 OS=Homo sapiens OX=9606 GN=BAG2 PE=1 SV=1	BAG2	23.772	27.253	18	4	4	4	0.924	1.169	1.259	1.043	1.199	0.854	0.835	1.093	0.956	1.136	1.119	0.3201	1.046	0.62242	1.508	0.035419	0.918	0.59376	0.771	0.35794	1.07	0.58636
O95822	Malonyl-CoA decarboxylase, mitochondrial OS=Homo sapiens OX=9606 GN=MLYCD PE=1 SV=3	MLYCD	55.003	13.241	4.3	2	2	2	0.913	0.806	1.357	0.798	1.691	0.89	0.872	1.122	1.367	1.15	1.536	0.57096	0.915	0.61864	1.556	0.41448	0.694	0.151817	0.54	0.469	0.718	0.47416
O95825	Quinone oxidoreductase-like protein 1 OS=Homo sapiens OX=9606 GN=CRYZL1 PE=1 SV=2	CRYZL1	38.696	21.91	6.6	2	3	2	1.135	1.123	0.94	0.994	1.548	0.84	0.937	1.243	1.117	0.878	1.33	0.41294	0.975	0.99946	1.003	0.9455	1.132	0.29114	0.733	0.26828	0.903	0.4647
O95831	Apoptosis-inducing factor 1, mitochondrial OS=Homo sapiens OX=9606 GN=AIFM1 PE=1 SV=1	AIFM1	66.9	129.82	26.4	13	20	13	1.03	0.828	1.23	1.061	0.557	1.744	1.198	0.533	0.435	1.156	0.249	7.8919e-07	0.884	0.7973	1.027	0.091321	0.918	0.101038	1.849	6.0414e-05	1.553	0.000100753
O95834	Echinoderm microtubule-associated protein-like 2 OS=Homo sapiens OX=9606 GN=EML2 PE=1 SV=1	EML2	70.678	95.198	14	8	13	8	1.517	1.086	1.033	0.923	1.061	1.063	0.835	1	1.068	0.94	1.005	0.46966	1.149	0.21394	1.237	0.099165	0.982	0.8647	1.43	0.0032001	1.086	0.44692
O95837	Guanine nucleotide-binding protein subunit alpha-14 OS=Homo sapiens OX=9606 GN=GNA14 PE=1 SV=1	GNA14	41.57	8.6566	9	3	5	1	1.046	2.208	0.567	1.132	0.809	0.711	0.994	0.948	0.654	1.273	0.92		1.184	0.7995	0.57		0.889		1.293		2.329
O95861	3'(2'),5'-bisphosphate nucleotidase 1 OS=Homo sapiens OX=9606 GN=BPNT1 PE=1 SV=1	BPNT1	33.392	47.35	18.8	5	7	5	0.867	0.693	1.352	0.689	1.448	1.113	0.838	1.1	1.708	1.143	1.535	7.7269e-07	0.941	0.58626	1.613	0.00091576	0.603	0.00195537	0.599	0.00142437	0.63	0.00111969
O95866	Megakaryocyte and platelet inhibitory receptor G6b OS=Homo sapiens OX=9606 GN=MPIG6B PE=1 SV=1	MPIG6B	26.163	12.02	6.6	2	2	2
O95870	Protein ABHD16A OS=Homo sapiens OX=9606 GN=ABHD16A PE=1 SV=3	ABHD16A	63.243	12.425	3.6	2	2	2
O95881	Thioredoxin domain-containing protein 12 OS=Homo sapiens OX=9606 GN=TXNDC12 PE=1 SV=1	TXNDC12	19.206	31.388	18	3	4	3	1.958	1.458	1.135	0.964	0.502	0.558	0.667	1.138	0.388	1.488	0.695	0.134116	1.356	0.45942	1.702	0.00145503	0.648	0.0177569	3.9	0.00044445	1.281	0.00025654
O95976	Immunoglobulin superfamily member 6 OS=Homo sapiens OX=9606 GN=IGSF6 PE=2 SV=2	IGSF6	27.013	6.5044	4.6	1	1	1
O96000	NADH dehydrogenase [ubiquinone] 1 beta subcomplex subunit 10 OS=Homo sapiens OX=9606 GN=NDUFB10 PE=1 SV=3	NDUFB10	20.776	41.829	27.9	4	8	4	1.265	1.06	0.71	1.039	0.659	1.475	1.281	0.768	0.376	1.418	0.255	0.0024609	0.795	0.37216	0.554	4.3826e-05	0.733	0.00162307	1.92	0.0155759	1.38	0.00036204
O96005	Cleft lip and palate transmembrane protein 1 OS=Homo sapiens OX=9606 GN=CLPTM1 PE=1 SV=1	CLPTM1	76.096	52.564	5.8	3	5	3	1.33	1.168	0.846	0.896	0.795	1.223	1.479	0.665	0.68	1.041	0.556	0.182404	0.946	0.82164	0.572	0.0160813	0.861	0.143882	1.673	0.051956	1.756	0.00020308
O96008	Mitochondrial import receptor subunit TOM40 homolog OS=Homo sapiens OX=9606 GN=TOMM40 PE=1 SV=1	TOMM40	37.893	27	9.7	3	10	3	0.946	1.008	1.757	0.76	0.589	0.794	1.459	0.745	0.443	1.424	0.558	0.068939	0.981	0.86686	1.204	0.4947	0.534	3.5208e-06	1.606	0.101403	1.353	0.0112161
O96011	Peroxisomal membrane protein 11B OS=Homo sapiens OX=9606 GN=PEX11B PE=1 SV=1	PEX11B	28.431	37.2	16.6	4	5	4	0.965	1.47	0.705	1.21	0.616	1.395	1.191	0.943	0.788	0.826	0.565		1.034	0.85972	0.592		1.465		1.567		1.559
O96019	Actin-like protein 6A OS=Homo sapiens OX=9606 GN=ACTL6A PE=1 SV=1	ACTL6A	47.46	56.998	17.2	6	9	6	1.047	1.335	0.897	1.002	0.603	1.356	1.266	0.882	0.649	0.957	0.479	0.0084423	0.974	0.9426	0.709	0.00079989	1.047	0.93306	1.736	0.014405	1.514	0.00027668
P00167	Cytochrome b5 OS=Homo sapiens OX=9606 GN=CYB5A PE=1 SV=2	CYB5A	15.33	34.823	26.9	3	5	3	0.999	0.886	1.284	0.793	1.436	0.717	0.832	1.182	1.825	1.169	2.545	3.5552e-05	1.085	0.74528	1.543	0.005902	0.678	0.047838	0.696	0.026123	0.75	0.040777
P00338	L-lactate dehydrogenase A chain OS=Homo sapiens OX=9606 GN=LDHA PE=1 SV=2	LDHA	36.688	104.62	34	12	33	11	0.952	1.331	0.576	1.152	0.908	1.31	1.105	0.749	1.025	1.089	0.782	0.00022006	0.976	0.8052	0.521	2.0814e-11	1.058	0.180098	1.048	0.65288	1.777	2.78089e-12
P00352	Retinal dehydrogenase 1 OS=Homo sapiens OX=9606 GN=ALDH1A1 PE=1 SV=2	ALDH1A1	54.861	259.34	40.5	17	82	16	0.788	0.808	1.483	1.138	1.927	0.329	0.669	1.017	2.292	0.889	6.967	1.62448e-12	1.347	0.31964	2.217	1.62448e-12	1.28	1.3789e-08	0.409	1.62448e-12	0.794	6.9745e-10
P00367	Glutamate dehydrogenase 1, mitochondrial OS=Homo sapiens OX=9606 GN=GLUD1 PE=1 SV=2	GLUD1	61.397	164.11	30.1	13	20	13	1.196	1.126	0.969	0.977	0.772	1.192	1.369	0.776	0.533	0.986	0.447	5.5064e-07	0.942	0.71332	0.708	4.6578e-06	0.991	0.93432	1.549	0.00022303	1.451	1.8756e-05
P00387	NADH-cytochrome b5 reductase 3 OS=Homo sapiens OX=9606 GN=CYB5R3 PE=1 SV=3	CYB5R3	34.234	53.489	21.9	6	9	6	1.076	1.086	0.951	0.88	1.356	0.828	0.896	1.204	1.245	1.132	1.504	0.00163826	0.967	0.83428	1.061	0.64308	0.777	0.0062848	0.794	0.00107605	0.902	0.036843
P00390	Glutathione reductase, mitochondrial OS=Homo sapiens OX=9606 GN=GSR PE=1 SV=2	GSR	56.256	111.61	22.6	11	21	11	0.904	0.847	1.414	0.804	2.006	0.528	0.855	1.278	1.474	1.078	2.792	1.5596e-11	0.947	0.9831	1.654	7.117e-08	0.746	3.1902e-07	0.451	3.98992e-12	0.663	3.645e-08
P00403	Cytochrome c oxidase subunit 2 OS=Homo sapiens OX=9606 GN=MT-CO2 PE=1 SV=1	MT-CO2	25.565	8.0825	4.4	1	1	1	1.226	0.962	0.623	1.187	0.571	1.333	1.668	0.74	0.775	1.013	0.581		0.896	0.77582	0.374		1.172		2.147		1.3
P00441	Superoxide dismutase [Cu-Zn] OS=Homo sapiens OX=9606 GN=SOD1 PE=1 SV=2	SOD1	15.936	53.159	31.2	5	8	5	0.78	0.503	1.234	0.706	2.911	0.448	0.593	1.299	2.485	0.96	5.547	4.3733e-05	0.919	0.95406	2.081	4.1863e-05	0.735	0.00134212	0.268	2.2978e-09	0.387	1.2225e-06
P00450	Ceruloplasmin OS=Homo sapiens OX=9606 GN=CP PE=1 SV=1	CP	122.2	323.31	17	15	28	15	0.711	0.616	0.699	0.649	0.682	1.549	1.497	1.014	1.788	1.196	1.154	0.0093042	0.752	0.21228	0.467	1.11022e-16	0.543	1.41109e-13	1.043	0.33508	0.607	2.5228e-06
P00488	Coagulation factor XIII A chain OS=Homo sapiens OX=9606 GN=F13A1 PE=1 SV=4	F13A1	83.266	96.681	18.6	12	13	12	1.02	1.765	0.557	1.141	0.622	0.846	1.96	0.676	0.517	0.511	0.611	0.020304	1.083	0.76556	0.284	7.7712e-05	2.233	0.0142773	1.64	0.10558	2.611	0.0025778
P00491	Purine nucleoside phosphorylase OS=Homo sapiens OX=9606 GN=PNP PE=1 SV=2	PNP	32.118	176.38	43.6	12	44	12	0.797	0.661	1.303	0.583	2.392	0.331	0.763	1.402	2.374	1.085	7.172	1e-32	0.957	0.9877	1.708	1e-32	0.537	5.90639e-14	0.333	1e-32	0.471	1.62448e-12
P00492	Hypoxanthine-guanine phosphoribosyltransferase OS=Homo sapiens OX=9606 GN=HPRT1 PE=1 SV=2	HPRT1	24.579	145.66	47.7	9	33	9	0.938	0.847	1.614	0.706	1.944	0.362	0.664	1.393	1.883	1.09	5.202	1e-32	1.098	0.63072	2.431	1.65035e-12	0.648	4.2705e-10	0.483	1.31595e-12	0.608	3.1607e-08
P00505	Aspartate aminotransferase, mitochondrial OS=Homo sapiens OX=9606 GN=GOT2 PE=1 SV=3	GOT2	47.517	59.839	22.8	9	13	9	1.368	0.872	1.554	0.664	0.723	1.472	1.43	0.677	0.436	0.926	0.296	6.7503e-07	0.936	0.69752	1.087	0.133697	0.717	0.0047437	1.892	4.1177e-06	1.288	0.067385
P00558	Phosphoglycerate kinase 1 OS=Homo sapiens OX=9606 GN=PGK1 PE=1 SV=3	PGK1	44.614	323.31	66.9	25	70	25	0.936	0.819	1.586	0.845	1.504	0.674	0.815	1.068	1.839	0.947	2.728	1e-32	1.203	0.47332	1.946	1.62459e-12	0.892	0.029245	0.622	1.62437e-12	0.767	1.6826e-07
P00568	Adenylate kinase isoenzyme 1 OS=Homo sapiens OX=9606 GN=AK1 PE=1 SV=3	AK1	21.635	101.37	43.8	10	18	10	1.109	0.956	1.098	1.074	1.67	0.705	0.708	0.865	1.71	1.071	2.426	3.9604e-08	1.185	0.31304	1.551	0.00052474	1.003	0.35924	0.664	1.89995e-05	1.105	0.2976
P00734	Prothrombin OS=Homo sapiens OX=9606 GN=F2 PE=1 SV=2	F2	70.036	260.86	24.9	14	26	14	0.91	0.552	1.435	0.875	0.771	1.221	1.297	0.755	1.439	1.107	1.179	0.00102175	1.012	0.91498	1.106	0.184398	0.79	2.3573e-07	1.18	0.2646	0.731	0.050979
P00738	Haptoglobin OS=Homo sapiens OX=9606 GN=HP PE=1 SV=1	HP	45.205	314.49	44.1	20	31	20	0.702	1.303	0.835	0.823	1.673	0.942	0.746	1.54	1.681	0.673	1.785	3.24707e-12	0.959	0.91114	1.119	0.00244	1.223	0.02784	0.42	9.99201e-16	0.846	0.00064391
P00742	Coagulation factor X OS=Homo sapiens OX=9606 GN=F10 PE=1 SV=2	F10	54.731	10.238	3.5	1	1	1	1.54	0.399	0.877	0.831	0.7	1.025	1.96	0.411	1.073	1.592	1.047		0.83	0.72616	0.447		0.522		2.2		0.971
P00747	Plasminogen OS=Homo sapiens OX=9606 GN=PLG PE=1 SV=2	PLG	90.568	323.31	27.4	17	24	17	1.189	0.611	1.041	0.827	0.786	1.152	1.883	0.857	0.852	1.025	0.74	0.00166301	0.793	0.30996	0.553	2.0962e-05	0.807	0.0109178	1.513	7.536e-05	0.713	0.037624
P00748	Coagulation factor XII OS=Homo sapiens OX=9606 GN=F12 PE=1 SV=3	F12	67.791	6.5482	1.5	1	1	1
P00751	Complement factor B OS=Homo sapiens OX=9606 GN=CFB PE=1 SV=2	CFB	85.532	40.628	7.1	5	5	5	1.047	0.674	0.685	0.804	1.486	1.25	1.176	1.076	1.498	1.102	1.198		0.773	0.10122	0.582		0.73		0.705		0.626
P00813	Adenosine deaminase OS=Homo sapiens OX=9606 GN=ADA PE=1 SV=3	ADA	40.764	20.997	7.4	3	3	3	1.319	1.48	1.017	0.69	1.062	0.951	1.076	0.839	1.183	0.908	1.244	0.098144	1.176	0.36682	0.945	0.77216	0.76	0.36198	1.242	0.147204	1.764	0.045604
P00915	Carbonic anhydrase 1 OS=Homo sapiens OX=9606 GN=CA1 PE=1 SV=2	CA1	28.87	291.4	50.6	11	41	11	1.116	1.049	0.969	0.999	2.138	0.522	0.73	1.04	1.633	0.979	3.128	1.62437e-12	1.066	0.54264	1.327	3.8802e-09	1.02	0.18728	0.522	1.62448e-12	1.009	0.5122
P00918	Carbonic anhydrase 2 OS=Homo sapiens OX=9606 GN=CA2 PE=1 SV=2	CA2	29.246	132.98	55	11	22	11	1.278	0.897	0.823	0.772	2.312	0.484	0.637	1.165	1.22	1.226	2.521	1.6258e-08	0.857	0.92816	1.292	0.42776	0.63	5.6941e-05	0.553	2.1671e-06	0.77	0.057396
P00966	Argininosuccinate synthase OS=Homo sapiens OX=9606 GN=ASS1 PE=1 SV=2	ASS1	46.53	56.305	17.7	8	10	8	0.37	0.326	0.224	1.083	0.266	3.883	0.323	0.418	0.342	2.107	0.088	6.4731e-10	0.335	0.29532	0.693	0.31522	0.514	4.7361e-06	1.391	0.50958	0.78	0.60656
P00973	2'-5'-oligoadenylate synthase 1 OS=Homo sapiens OX=9606 GN=OAS1 PE=1 SV=4	OAS1	46.028	10.541	2.5	1	1	1	0.444	0.666	0.989	0.409	4.92	1.391	0.676	0.373	0.504	1.28	0.362		0.349	0.155721	1.463		0.32		0.09		1.786
P01008	Antithrombin-III OS=Homo sapiens OX=9606 GN=SERPINC1 PE=1 SV=1	SERPINC1	52.602	6.4409	2.4	1	1	1
P01009	Alpha-1-antitrypsin OS=Homo sapiens OX=9606 GN=SERPINA1 PE=1 SV=3	SERPINA1	46.736	34.687	10.3	6	6	6	0.688	0.844	0.924	0.738	0.907	1.129	0.479	0.911	4.102	1.005	3.633	0.125957	1.647	0.50072	1.929	0.068196	0.734	0.14856	0.759	0.048201	0.926	0.51798
P01011	Alpha-1-antichymotrypsin OS=Homo sapiens OX=9606 GN=SERPINA3 PE=1 SV=2	SERPINA3	47.65	6.7631	2.1	1	1	1
P01019	Angiotensinogen OS=Homo sapiens OX=9606 GN=AGT PE=1 SV=1	AGT	53.154	14.187	4.9	2	2	2	0.896	0.997	1.311	0.64	1.236	0.629	0.791	1.576	1.337	1.496	2.126		0.905	0.75258	1.657		0.428		0.725		0.633
P01023	Alpha-2-macroglobulin OS=Homo sapiens OX=9606 GN=A2M PE=1 SV=3	A2M	163.29	282.57	22	27	35	23	0.936	1.054	1.112	0.726	1.011	0.622	0.798	1.116	1.148	2.023	1.846	7.7034e-05	0.893	0.84656	1.393	2.1679e-05	0.359	9.8898e-08	0.926	0.13086	0.944	0.33236
P01024	Complement C3 OS=Homo sapiens OX=9606 GN=C3 PE=1 SV=2	C3	187.15	323.31	30.8	45	84	45	0.904	0.661	0.625	0.819	0.757	1.304	1.639	0.786	1.495	1.446	1.146	4.3714e-06	0.759	0.24706	0.381	1e-32	0.566	1.62448e-12	1.194	3.784e-07	0.841	8.3974e-07
P01031	Complement C5 OS=Homo sapiens OX=9606 GN=C5 PE=1 SV=4	C5	188.3	77.096	6	10	11	10	0.917	0.763	0.801	0.93	0.709	1.363	1.402	1	1.323	1.24	0.971	0.45012	0.828	0.29562	0.571	9.6315e-05	0.75	0.000176388	1.293	0.069661	0.763	0.0023364
P01042	Kininogen-1 OS=Homo sapiens OX=9606 GN=KNG1 PE=1 SV=2	KNG1	71.957	175.87	15.1	8	13	8	1.212	0.532	0.982	0.74	0.981	0.748	1.178	1.068	1.141	2.089	1.525	0.000140019	0.76	0.29258	0.834	0.00099917	0.354	2.0753e-09	1.235	1.53582e-05	0.498	0.000196185
P01111	GTPase NRas OS=Homo sapiens OX=9606 GN=NRAS PE=1 SV=1	NRAS	21.229	30.481	26.5	4	9	0
P01112	GTPase HRas OS=Homo sapiens OX=9606 GN=HRAS PE=1 SV=1	HRAS	21.298	-2	26.5	4	6	1
P01116	GTPase KRas OS=Homo sapiens OX=9606 GN=KRAS PE=1 SV=1	KRAS	21.656	71.851	27.5	6	14	4	0.835	0.717	1.29	1.124	1.296	0.837	1.129	1.001	1.974	0.771	2.358	7.5971e-05	1.18	0.5699	1.143	0.2466	1.458	0.0139228	0.644	0.00171645	0.716	0.027619
P01137	Transforming growth factor beta-1 OS=Homo sapiens OX=9606 GN=TGFB1 PE=1 SV=2	TGFB1	44.341	21.25	8.5	3	3	3	1.339	1.336	0.727	1.013	0.951	0.693	1.554	0.914	1.088	0.863	1.57		1.106	0.52788	0.468		1.174		1.408		1.462
P01591	Immunoglobulin J chain OS=Homo sapiens OX=9606 GN=JCHAIN PE=1 SV=4	JCHAIN	18.098	61.825	31.4	4	5	4	1.533	0.738	0.897	0.755	0.52	2.049	0.509	0.458	0.451	1.384	0.22	0.023256	0.889	0.9978	1.762	0.086985	0.546	0.07926	2.948	0.035102	1.611	0.29736
P01834	Immunoglobulin kappa constant OS=Homo sapiens OX=9606 GN=IGKC PE=1 SV=2	IGKC	11.765	237.71	80.4	6	21	6	1.047	0.544	0.808	0.318	1.056	1.691	1.998	0.846	0.308	0.332	0.182	6.251e-05	0.511	0.159455	0.404	5.3842e-08	0.958	0.57976	0.991	0.073378	0.643	0.00037932
P01860	Immunoglobulin heavy constant gamma 3 OS=Homo sapiens OX=9606 GN=IGHG3 PE=1 SV=2	IGHG3	41.287	23.591	28.9	9	24	2	0.651	1.676	0.812	0.614	1.758	1.484	0.798	0.463	1.282	1.209	0.864		0.881	0.74866	1.018		0.508		0.37		3.62
P01861	Immunoglobulin heavy constant gamma 4 OS=Homo sapiens OX=9606 GN=IGHG4 PE=1 SV=1	IGHG4	35.94	101.05	37	9	28	5	5.413	0.622	0.496	0.448	0.466	0.472	0.46	0.481	0.383	0.468	0.811	0.54646	3.137	0.3607	1.078	0.33828	0.957	0.5617	11.616	1.4698e-10	1.293	0.20208
P01871	Immunoglobulin heavy constant mu OS=Homo sapiens OX=9606 GN=IGHM PE=1 SV=4	IGHM	49.439	74.566	17.9	7	12	7	0.917	2.209	0.454	0.954	0.657	1.165	1.589	0.958	0.602	0.303	0.517	0.0043814	1.099	0.84202	0.286	9.7987e-05	3.149	0.0023995	1.396	0.00140231	2.306	2.8305e-10
P01876	Immunoglobulin heavy constant alpha 1 OS=Homo sapiens OX=9606 GN=IGHA1 PE=1 SV=2	IGHA1	37.654	46.864	17.6	6	8	4	0.998	1.86	0.631	0.717	2.646	0.794	0.834	0.829	0.901	0.785	1.135	0.59272	0.867	0.79296	0.757	0.31762	0.913	0.6862	0.377	0.0031967	2.244	0.0061158
P01892	HLA class I histocompatibility antigen, A-2 alpha chain OS=Homo sapiens OX=9606 GN=HLA-A PE=1 SV=1	HLA-A	40.921	13.314	29.6	9	14	0
P02008	Hemoglobin subunit zeta OS=Homo sapiens OX=9606 GN=HBZ PE=1 SV=2	HBZ	15.637	96.696	47.9	6	9	5	0.431	0.337	0.365	0.499	3.764	0.407	1.692	0.682	2.192	1.611	5.386	1.9334e-06	0.469	0.171635	0.216	2.385e-05	0.31	4.0524e-05	0.115	2.8378e-08	0.494	0.0077824
P02042	Hemoglobin subunit delta OS=Homo sapiens OX=9606 GN=HBD PE=1 SV=2	HBD	16.055	124.41	87.1	13	253	6	0.84	0.644	1.501	0.759	2.617	0.421	0.662	1.096	1.95	0.911	4.632	1e-32	0.998	0.7937	2.267	5.55112e-16	0.833	0.00036161	0.321	1e-32	0.588	7.6649e-08
P02100	Hemoglobin subunit epsilon OS=Homo sapiens OX=9606 GN=HBE1 PE=1 SV=2	HBE1	16.203	-2	18.4	3	2	1	1.332	2.174	0.485	1.334	1.026	0.599	0.693	1.043	0.383	1.314	0.639	0.26434	1.221	0.91176	0.7	0.33316	1.015	0.8978	1.298	0.079682	2.084	0.0163238
P02452	Collagen alpha-1(I) chain OS=Homo sapiens OX=9606 GN=COL1A1 PE=1 SV=5	COL1A1	138.94	5.9844	0.6	1	1	1
P02458	Collagen alpha-1(II) chain OS=Homo sapiens OX=9606 GN=COL2A1 PE=1 SV=3	COL2A1	141.78	5.8426	0.7	1	1	1	1.407	1.11	0.521	0.788	0.458	2.273	0.865	0.888	0.224	1.124	0.099		0.722	0.40132	0.602		0.701		3.072		1.25
P02545	Prelamin-A/C OS=Homo sapiens OX=9606 GN=LMNA PE=1 SV=1	LMNA	74.139	163.35	28.5	17	28	16	0.905	0.79	0.719	0.893	0.479	2.822	0.975	0.647	0.438	0.764	0.155	2.4703e-09	0.659	0.49832	0.737	0.0002194	1.169	0.0102353	1.889	0.0046171	1.221	0.158379
P02549	Spectrin alpha chain, erythrocytic 1 OS=Homo sapiens OX=9606 GN=SPTA1 PE=1 SV=5	SPTA1	280.01	323.31	49.9	119	592	119	0.776	0.902	0.954	1.262	1.59	0.679	1.103	1.143	1.407	1.007	2.072	1e-32	0.96	0.87276	0.865	1e-32	1.253	1e-32	0.488	1e-32	0.789	1e-32
P02647	Apolipoprotein A-I OS=Homo sapiens OX=9606 GN=APOA1 PE=1 SV=1	APOA1	30.777	152.24	45.3	12	26	12	0.981	0.614	1.454	0.436	1.721	0.548	0.692	1.413	0.975	2.148	1.779	3.0142e-08	0.684	0.35066	2.101	4.24105e-14	0.203	1e-32	0.57	1.73705e-12	0.435	1.11022e-16
P02652	Apolipoprotein A-II OS=Homo sapiens OX=9606 GN=APOA2 PE=1 SV=1	APOA2	11.175	13.056	17	2	4	2	1.154	0.543	1.485	0.343	1.692	0.566	0.624	1.674	0.902	1.97	1.594	0.0040247	0.678	0.33808	2.38	5.7439e-05	0.174	0.000196735	0.682	5.6751e-05	0.324	0.0041966
P02654	Apolipoprotein C-I OS=Homo sapiens OX=9606 GN=APOC1 PE=1 SV=1	APOC1	9.3318	16.656	24.1	2	3	2	0.844	0.551	1.611	0.397	1.098	0.561	1.795	1.612	0.687	1.349	1.225	0.141202	0.638	0.152997	0.897	0.27386	0.294	0.0048448	0.769	0.075936	0.342	0.063263
P02655	Apolipoprotein C-II OS=Homo sapiens OX=9606 GN=APOC2 PE=1 SV=1	APOC2	11.284	7.0805	8.9	1	1	1	0.946	0.43	2.046	0.546	1.194	0.646	1.2	1.475	0.85	1.334	1.316		0.824	0.33858	1.705		0.409		0.792		0.292
P02656	Apolipoprotein C-III OS=Homo sapiens OX=9606 GN=APOC3 PE=1 SV=1	APOC3	10.852	118.99	27.3	2	2	2	0.678	0.363	1.435	0.277	1.539	0.264	0.766	3.058	0.83	1.78	3.144	0.161058	0.484	0.27124	1.873	0.023562	0.156	0.0117397	0.441	0.02316	0.119	0.0071357
P02671	Fibrinogen alpha chain OS=Homo sapiens OX=9606 GN=FGA PE=1 SV=2	FGA	94.972	323.31	28.9	27	66	27	0.871	0.58	1.049	1.135	0.648	0.614	1.368	0.968	1.658	1.021	2.7	8.6241e-10	1.146	0.60278	0.767	5.771e-05	1.112	0.039522	1.344	1.9729e-06	0.599	6.5171e-10
P02675	Fibrinogen beta chain OS=Homo sapiens OX=9606 GN=FGB PE=1 SV=2	FGB	55.928	323.31	46.6	20	57	20	0.832	0.538	1.604	0.973	0.786	0.885	1.374	0.948	1.384	1.128	1.564	1.59872e-13	1.041	0.96038	1.167	0.003697	0.863	0.147785	1.059	0.81692	0.568	1.6949e-10
P02679	Fibrinogen gamma chain OS=Homo sapiens OX=9606 GN=FGG PE=1 SV=3	FGG	51.511	323.31	42.8	19	49	19	0.758	0.54	1.794	0.989	0.675	0.815	1.481	0.966	1.428	1.109	1.752	1.93612e-12	1.092	0.89508	1.211	0.00038061	0.892	8.1189e-05	1.123	0.132137	0.559	2.51543e-12
P02730	Band 3 anion transport protein OS=Homo sapiens OX=9606 GN=SLC4A1 PE=1 SV=3	SLC4A1	101.79	323.31	29.2	26	200	26	0.651	0.618	1.008	1.331	1.32	0.994	1.32	0.667	2.047	0.84	2.059	1.62448e-12	1.1	0.92306	0.764	1.8238e-10	1.585	1.62437e-12	0.493	1.62437e-12	0.927	0.0130614
P02741	C-reactive protein OS=Homo sapiens OX=9606 GN=CRP PE=1 SV=1	CRP	25.038	10.432	4.5	1	1	1	0.385	0.569	0.293	0.531	0.371	2.109	0.376	1.782	4.295	0.594	2.037		1.161	0.80964	0.779		0.894		1.038		0.319
P02743	Serum amyloid P-component OS=Homo sapiens OX=9606 GN=APCS PE=1 SV=2	APCS	25.387	29.735	18.4	4	5	4	0.868	0.598	0.56	0.938	0.69	1.355	2.124	0.695	1.35	1.043	0.996	0.35126	0.73	0.33598	0.264	4.5462e-07	0.899	0.100963	1.258	0.075198	0.86	0.054239
P02745	Complement C1q subcomponent subunit A OS=Homo sapiens OX=9606 GN=C1QA PE=1 SV=2	C1QA	26.016	6.3724	4.1	1	1	1	0.759	0.959	0.492	1.652	0.651	1.139	1.229	0.649	2.47	0.928	2.169		1.378	0.55154	0.4		1.78		1.166		1.478
P02746	Complement C1q subcomponent subunit B OS=Homo sapiens OX=9606 GN=C1QB PE=1 SV=3	C1QB	26.721	14.645	5.9	1	2	1	0.987	0.911	0.822	1.164	1.098	1.266	1.544	0.856	0.815	0.856	0.644		0.836	0.25512	0.532		1.36		0.899		1.064
P02748	Complement component C9 OS=Homo sapiens OX=9606 GN=C9 PE=1 SV=2	C9	63.173	56.746	10.6	8	11	8	0.645	0.612	0.735	0.753	0.827	1.408	1.695	1.063	1.463	0.895	1.039	0.56964	0.715	0.126339	0.434	2.0957e-11	0.841	0.157064	0.78	0.029745	0.576	0.0094983
P02749	Beta-2-glycoprotein 1 OS=Homo sapiens OX=9606 GN=APOH PE=1 SV=3	APOH	38.298	143.7	27.2	6	8	6	1.163	1.089	0.725	0.956	0.668	1.101	1.578	1.029	0.574	0.917	0.521	0.00044372	0.852	0.44188	0.459	0.000178383	1.043	0.95444	1.741	0.0084195	1.058	0.97996
P02751	Fibronectin OS=Homo sapiens OX=9606 GN=FN1 PE=1 SV=4	FN1	262.62	323.31	24.5	43	81	43	0.544	0.779	0.801	1.675	0.524	1.79	1.825	0.533	0.526	0.707	0.294	1.62448e-12	0.804	0.6731	0.439	1e-32	2.369	1e-32	1.038	0.99918	1.462	1.0001e-07
P02753	Retinol-binding protein 4 OS=Homo sapiens OX=9606 GN=RBP4 PE=1 SV=3	RBP4	23.01	6.4434	5.5	1	1	1
P02760	Protein AMBP OS=Homo sapiens OX=9606 GN=AMBP PE=1 SV=1	AMBP	38.999	8.3149	3.7	1	1	1
P02765	Alpha-2-HS-glycoprotein OS=Homo sapiens OX=9606 GN=AHSG PE=1 SV=1	AHSG	39.324	73.094	12.3	3	6	3	1.004	0.651	1.358	0.935	0.889	0.547	1.107	1.086	1.506	1.686	2.753	1.6454e-05	1.026	0.84512	1.227	0.050664	0.555	1.156e-06	1.129	0.090664	0.599	0.002275
P02766	Transthyretin OS=Homo sapiens OX=9606 GN=TTR PE=1 SV=1	TTR	15.887	17.276	9.5	2	3	2	1.194	0.742	1.485	0.921	0.958	0.642	0.949	1.033	1.639	1.35	2.553	0.0024166	1.213	0.37374	1.565	0.020424	0.682	0.0042166	1.246	0.028539	0.718	0.32922
P02774	Vitamin D-binding protein OS=Homo sapiens OX=9606 GN=GC PE=1 SV=1	GC	52.963	215.92	37.1	17	32	17	0.932	0.525	1.061	0.896	0.741	1.356	1.177	0.882	1.469	1.325	1.083	0.03232	0.891	0.5107	0.901	0.00185573	0.676	9.8789e-07	1.258	2.3985e-05	0.595	5.7811e-09
P02775	Platelet basic protein OS=Homo sapiens OX=9606 GN=PPBP PE=1 SV=3	PPBP	13.894	21.433	15.6	2	4	2	1.841	0.62	0.383	0.921	0.633	0.543	2.79	1.155	0.353	0.465	0.65	0.148919	0.737	0.58084	0.137	9.6822e-07	1.981	0.042881	2.908	0.000100077	0.537	0.022923
P02776	Platelet factor 4 OS=Homo sapiens OX=9606 GN=PF4 PE=1 SV=2	PF4	10.845	22.793	34.7	3	4	3	1.303	0.877	0.554	1.084	1.177	0.552	2.577	0.788	0.714	0.705	1.293		0.782	0.68902	0.215		1.538		1.107		1.113
P02786	Transferrin receptor protein 1 OS=Homo sapiens OX=9606 GN=TFRC PE=1 SV=2	TFRC	84.87	161.47	26.7	18	32	18	1.937	1.337	0.474	0.825	0.765	0.705	0.804	1.217	0.47	1.642	0.667	0.014777	0.982	0.721	0.59	1.0322e-07	0.502	3.88578e-15	2.532	3.33067e-16	1.099	0.033737
P02787	Serotransferrin OS=Homo sapiens OX=9606 GN=TF PE=1 SV=3	TF	77.063	137.15	25.1	16	21	16	1.659	1.147	0.609	0.577	0.727	0.654	0.572	1.767	0.479	2.106	0.732	0.071502	0.767	0.53956	1.065	0.56688	0.274	1.97e-11	2.282	1.7783e-08	0.649	4.6625e-06
P02788	Lactotransferrin OS=Homo sapiens OX=9606 GN=LTF PE=1 SV=6	LTF	78.181	323.31	63.5	47	108	47	1.257	1.752	0.625	1.279	0.753	1.093	0.847	0.973	0.647	0.905	0.592	5.6527e-07	1.216	0.59394	0.738	7.23577e-12	1.413	1e-32	1.669	1.8107e-10	1.801	1.62437e-12
P02790	Hemopexin OS=Homo sapiens OX=9606 GN=HPX PE=1 SV=2	HPX	51.676	12.356	4.3	2	2	2	0.954	0.876	0.933	0.729	1.421	1.125	0.962	1.31	1.142	1.257	1.015		0.763	0.025084	0.97		0.58		0.671		0.669
P02792	Ferritin light chain OS=Homo sapiens OX=9606 GN=FTL PE=1 SV=2	FTL	20.019	59.692	28	4	7	4	1.757	2.028	0.904	0.799	0.676	0.926	0.675	0.834	0.528	0.716	0.57	0.029882	1.572	0.26408	1.339	0.3156	1.116	0.39772	2.599	0.00026273	2.432	1.59026e-05
P02794	Ferritin heavy chain OS=Homo sapiens OX=9606 GN=FTH1 PE=1 SV=2	FTH1	21.225	122	48.6	8	15	8	1.505	2.279	0.927	1.072	0.588	0.632	0.629	1.103	0.54	0.921	0.854	0.6311	1.633	0.169555	1.474	0.00151845	1.164	0.85522	2.56	0.00031574	2.066	0.00024191
P03928	ATP synthase protein 8 OS=Homo sapiens OX=9606 GN=MT-ATP8 PE=1 SV=1	MT-ATP8	7.9916	12.252	32.4	2	3	2	1.099	0.761	1.137	1.05	0.758	1.474	1.476	0.765	0.781	0.843	0.53	0.27602	0.908	0.73564	0.77	0.41608	1.246	0.73234	1.45	0.24318	0.995	0.87582
P04003	C4b-binding protein alpha chain OS=Homo sapiens OX=9606 GN=C4BPA PE=1 SV=2	C4BPA	67.033	118.51	22.3	12	21	12	0.716	0.749	0.477	0.74	0.908	1.101	2.947	0.621	1.069	0.999	0.971	0.28908	0.57	0.166043	0.162	1.25455e-14	0.741	4.99e-06	0.789	0.0195589	1.206	0.22964
P04004	Vitronectin OS=Homo sapiens OX=9606 GN=VTN PE=1 SV=1	VTN	54.305	47.864	12.8	6	12	6	0.864	1.004	0.722	0.919	0.814	1.237	1.621	0.842	0.979	1.179	0.791	0.09746	0.788	0.173736	0.445	3.2373e-09	0.779	0.033017	1.061	0.16774	1.192	0.05064
P04040	Catalase OS=Homo sapiens OX=9606 GN=CAT PE=1 SV=3	CAT	59.755	323.31	54.1	27	128	27	0.752	0.697	1.208	0.571	3.479	0.332	0.52	1.388	1.603	1.075	4.828	1e-32	0.711	0.8509	2.323	1e-32	0.531	1.62437e-12	0.216	1e-32	0.502	1.62448e-12
P04062	Glucosylceramidase OS=Homo sapiens OX=9606 GN=GBA PE=1 SV=3	GBA	59.716	22.82	5.4	3	4	3	1.02	1.185	0.84	0.887	0.804	1.378	0.658	1.237	0.788	1.561	0.572	0.21744	0.837	0.47012	1.277	0.37392	0.568	0.056843	1.269	0.185501	0.958	0.6714
P04066	Tissue alpha-L-fucosidase OS=Homo sapiens OX=9606 GN=FUCA1 PE=1 SV=4	FUCA1	53.688	7.8458	2.4	1	1	1	1.649	0.649	1.072	0.693	0.968	0.756	1.161	1.563	0.635	1.273	0.84		0.821	0.30974	0.923		0.544		1.704		0.415
P04075	Fructose-bisphosphate aldolase A OS=Homo sapiens OX=9606 GN=ALDOA PE=1 SV=2	ALDOA	39.42	323.31	46.4	19	43	18	1.096	1.124	0.95	0.738	1.818	0.839	0.702	1.276	1.179	1.152	1.405	4.342e-11	0.879	0.65294	1.353	1.0269e-07	0.641	4.32987e-13	0.603	3.34954e-13	0.881	0.110864
P04080	Cystatin-B OS=Homo sapiens OX=9606 GN=CSTB PE=1 SV=2	CSTB	11.139	41.182	33.7	3	8	3	0.992	1.198	1.004	1.033	0.949	0.824	1.339	1.358	0.873	0.935	1.059	0.9709	0.944	0.71946	0.75	0.0118611	1.105	0.99308	1.045	0.7638	0.882	0.27414
P04083	Annexin A1 OS=Homo sapiens OX=9606 GN=ANXA1 PE=1 SV=2	ANXA1	38.714	150.68	22	7	13	7	1.29	2.052	0.546	1.006	1.169	0.576	0.856	1.321	0.624	1.08	1.083	0.29014	1.103	0.94622	0.638	4.3677e-06	0.931	0.35042	1.104	0.33282	1.553	2.1396e-05
P04114	Apolipoprotein B-100 OS=Homo sapiens OX=9606 GN=APOB PE=1 SV=2	APOB	515.6	323.31	13.6	58	74	56	1.622	0.805	0.636	1.033	0.81	0.758	1.355	0.803	1.208	1.485	1.594	1.11022e-16	1.018	0.9689	0.469	1e-32	0.696	2.0517e-08	2.002	1e-32	1.002	0.67324
P04150	Glucocorticoid receptor OS=Homo sapiens OX=9606 GN=NR3C1 PE=1 SV=1	NR3C1	85.658	10.541	1.3	1	1	1	1.549	0.847	0.991	1.038	0.46	1.424	1.399	0.806	0.45	0.962	0.316		0.965	0.91624	0.708		1.079		3.367		1.051
P04181	Ornithine aminotransferase, mitochondrial OS=Homo sapiens OX=9606 GN=OAT PE=1 SV=1	OAT	48.534	77.664	12.1	5	7	5	2.144	1.052	0.724	0.857	0.79	0.8	0.841	1.288	0.653	0.981	0.816	0.45572	1.155	0.79582	0.861	0.097784	0.874	0.268	2.714	0.0079572	0.817	0.08414
P04196	Histidine-rich glycoprotein OS=Homo sapiens OX=9606 GN=HRG PE=1 SV=1	HRG	59.578	29.431	10.3	4	4	4	0.897	0.66	1.316	1.14	0.713	1.435	1.357	0.66	1.196	1.19	0.833	0.78072	0.973	0.9803	0.97	0.99676	0.958	0.85178	1.258	0.029523	1	0.92404
P04217	Alpha-1B-glycoprotein OS=Homo sapiens OX=9606 GN=A1BG PE=1 SV=4	A1BG	54.253	39.069	10.3	4	5	4	0.761	0.423	1.588	0.429	1.222	0.79	0.786	1.125	1.823	2.134	2.308	0.0171649	0.829	0.42528	2.02	0.079356	0.201	0.016244	0.623	0.037859	0.376	0.092538
P04222	HLA class I histocompatibility antigen, Cw-3 alpha chain OS=Homo sapiens OX=9606 GN=HLA-C PE=1 SV=2	HLA-C	40.86	20.272	26.5	8	14	0
P04233	HLA class II histocompatibility antigen gamma chain OS=Homo sapiens OX=9606 GN=CD74 PE=1 SV=3	CD74	33.515	20.52	7.8	2	4	2	1.876	0.842	1.185	0.85	1.006	0.695	1.668	0.778	0.691	0.722	0.994	0.91778	1.118	0.67632	0.71	0.061284	1.177	0.058157	1.865	0.028141	1.082	0.54448
P04275	von Willebrand factor OS=Homo sapiens OX=9606 GN=VWF PE=1 SV=4	VWF	309.26	96.037	4.8	12	13	12	0.88	0.842	0.883	2.533	0.732	0.728	1.418	0.705	0.656	0.831	0.901	0.26186	1.313	0.52268	0.623	0.00189881	3.048	0.0032167	1.202	0.106521	1.194	0.43018
P04350	Tubulin beta-4A chain OS=Homo sapiens OX=9606 GN=TUBB4A PE=1 SV=2	TUBB4A	49.585	-2	26.8	10	27	0
P04406	Glyceraldehyde-3-phosphate dehydrogenase OS=Homo sapiens OX=9606 GN=GAPDH PE=1 SV=3	GAPDH	36.053	323.31	46	15	132	15	0.504	0.439	1.788	0.904	1.368	0.744	1.14	0.704	2.493	0.784	3.351	1e-32	1.293	0.86084	1.568	1e-32	1.153	4.1181e-05	0.368	1e-32	0.624	3.79996e-12
P04424	Argininosuccinate lyase OS=Homo sapiens OX=9606 GN=ASL PE=1 SV=4	ASL	51.657	100.51	23.3	11	15	11	1.095	1.012	1.089	0.928	1.298	0.616	0.851	1.28	1.311	1.242	2.128	0.059296	1.028	0.70944	1.28	0.60078	0.747	0.066419	0.844	0.3188	0.791	0.024435
P04632	Calpain small subunit 1 OS=Homo sapiens OX=9606 GN=CAPNS1 PE=1 SV=1	CAPNS1	28.315	87.757	14.2	3	15	3	0.79	1.069	1.358	1.169	1.175	0.689	0.951	1.024	1.921	0.787	2.788	1.73406e-12	1.363	0.140317	1.428	7.5858e-09	1.485	2.4984e-08	0.672	1.8163e-05	1.044	0.60124
P04792	Heat shock protein beta-1 OS=Homo sapiens OX=9606 GN=HSPB1 PE=1 SV=2	HSPB1	22.782	108.5	32.7	7	8	7	0.823	1.056	1.28	0.441	0.497	2.394	0.55	0.68	1.764	0.749	0.737	0.288	1.101	0.61688	2.327	0.00105959	0.589	0.041604	1.656	0.27964	1.553	0.24122
P04839	Cytochrome b-245 heavy chain OS=Homo sapiens OX=9606 GN=CYBB PE=1 SV=2	CYBB	65.335	60.95	10.7	6	13	6	1.02	1.979	0.675	1.404	0.763	0.922	0.985	0.84	0.69	0.842	0.748	0.037136	1.325	0.4023	0.685	0.0022602	1.667	2.3482e-05	1.337	0.00022104	2.356	3.855e-08
P04843	Dolichyl-diphosphooligosaccharide--protein glycosyltransferase subunit 1 OS=Homo sapiens OX=9606 GN=RPN1 PE=1 SV=1	RPN1	68.569	158.3	27.5	16	29	16	1.372	1.002	0.912	0.798	0.442	1.775	1.131	0.834	0.334	1.078	0.188	3.7838e-09	0.84	0.61088	0.806	0.029218	0.74	2.6073e-08	3.104	8.1386e-09	1.201	0.0031753
P04844	Dolichyl-diphosphooligosaccharide--protein glycosyltransferase subunit 2 OS=Homo sapiens OX=9606 GN=RPN2 PE=1 SV=3	RPN2	69.283	108.42	12.4	7	12	7	1.4	0.775	0.888	0.801	0.465	1.981	1.224	0.739	0.461	0.978	0.233	2.0213e-08	0.803	0.59626	0.725	0.000156833	0.819	0.026801	3.011	1.6455e-07	1.049	0.7026
P04899	Guanine nucleotide-binding protein G(i) subunit alpha-2 OS=Homo sapiens OX=9606 GN=GNAI2 PE=1 SV=3	GNAI2	40.45	147.59	32.7	10	25	5	1.17	1.855	0.697	1.211	0.723	0.616	0.984	1.15	0.701	1.02	1.138	0.50176	1.254	0.42722	0.708	0.0176637	1.187	0.023256	1.618	4.3403e-05	1.613	2.0145e-05
P04920	Anion exchange protein 2 OS=Homo sapiens OX=9606 GN=SLC4A2 PE=1 SV=4	SLC4A2	137.01	5.9937	0.7	1	1	1	1.092	1.641	0.525	1.773	0.863	0.98	1.105	0.791	0.633	0.873	0.646		1.228	0.7161	0.475		2.031		1.265		2.075
P04921	Glycophorin-C OS=Homo sapiens OX=9606 GN=GYPC PE=1 SV=1	GYPC	13.81	11.252	7	1	3	1	0.982	0.864	1.44	0.736	1.96	0.325	0.633	1.232	1.584	1.312	4.874	0.0187572	1.026	0.66634	2.275	0.0035811	0.561	0.0084247	0.501	0.00070163	0.701	0.0064962
P05023	Sodium/potassium-transporting ATPase subunit alpha-1 OS=Homo sapiens OX=9606 GN=ATP1A1 PE=1 SV=1	ATP1A1	112.89	205.34	20.3	18	27	18	1.26	1.428	0.879	1.032	0.673	1.005	1.202	0.816	0.662	1.171	0.659	0.00041505	1.081	0.71562	0.731	4.038e-07	0.881	0.0099234	1.872	9.6911e-08	1.75	4.5335e-08
P05026	Sodium/potassium-transporting ATPase subunit beta-1 OS=Homo sapiens OX=9606 GN=ATP1B1 PE=1 SV=1	ATP1B1	35.061	7.1021	4.6	1	1	1
P05089	Arginase-1 OS=Homo sapiens OX=9606 GN=ARG1 PE=1 SV=2	ARG1	34.735	43.06	19.3	6	6	6	0.947	1.423	0.87	1.039	1.476	0.623	1.131	1.055	1.149	1.088	1.844	0.023043	1.01	0.8512	0.769	0.3507	0.955	0.8766	0.642	0.102342	1.349	0.153503
P05091	Aldehyde dehydrogenase, mitochondrial OS=Homo sapiens OX=9606 GN=ALDH2 PE=1 SV=2	ALDH2	56.381	99.34	26.7	11	18	10	1.385	2.761	0.43	0.805	0.601	0.95	0.692	1.084	0.443	0.7	0.466	0.0040807	1.446	0.7355	0.621	0.0179027	1.15	0.046581	2.304	0.000155847	2.547	8.3753e-10
P05106	Integrin beta-3 OS=Homo sapiens OX=9606 GN=ITGB3 PE=1 SV=2	ITGB3	87.057	200.09	18	13	19	13	1.47	2.02	0.415	1.036	0.684	0.61	2.133	0.614	0.38	0.488	0.623	0.00138339	1.175	0.78546	0.195	1.63036e-12	2.123	1.4555e-09	2.149	2.0758e-09	3.29	1e-32
P05107	Integrin beta-2 OS=Homo sapiens OX=9606 GN=ITGB2 PE=1 SV=2	ITGB2	84.781	205.3	25.1	17	31	17	1.297	2.029	0.723	1.074	0.873	0.556	0.802	1.333	0.542	0.901	0.975	0.99484	1.269	0.53848	0.901	0.26602	1.192	0.0033238	1.486	0.0025569	1.522	0.000120874
P05109	Protein S100-A8 OS=Homo sapiens OX=9606 GN=S100A8 PE=1 SV=1	S100A8	10.834	109.46	57	10	40	10	0.963	2.238	0.702	0.929	1.061	0.494	0.754	1.286	0.797	1.232	1.613	4.0537e-08	1.166	0.6795	0.931	0.30986	0.754	1.5097e-07	0.908	0.00059519	1.74	3.9927e-12
P05114	Non-histone chromosomal protein HMG-14 OS=Homo sapiens OX=9606 GN=HMGN1 PE=1 SV=3	HMGN1	10.659	9.2335	10	1	2	1	0.931	0.52	0.809	2.042	0.422	2.103	1.348	0.41	0.678	0.609	0.322		1.018	0.77316	0.6		3.353		2.206		1.268
P05141	ADP/ATP translocase 2 OS=Homo sapiens OX=9606 GN=SLC25A5 PE=1 SV=7	SLC25A5	32.852	119.33	30.9	11	20	5	0.895	0.788	1.001	0.78	0.538	2.59	0.831	0.69	0.345	1.271	0.133	8.6843e-08	0.643	0.34488	1.205	0.026724	0.614	2.1586e-08	1.664	0.0006843	1.142	0.3661
P05160	Coagulation factor XIII B chain OS=Homo sapiens OX=9606 GN=F13B PE=1 SV=3	F13B	75.51	-2	1.7	1	1	1
P05161	Ubiquitin-like protein ISG15 OS=Homo sapiens OX=9606 GN=ISG15 PE=1 SV=5	ISG15	17.887	15.653	13.9	2	2	2	0.524	0.336	1.217	0.645	5.557	0.416	1.435	0.415	0.974	0.645	2.341		0.436	0.50476	0.848		1		0.094		0.81
P05164	Myeloperoxidase OS=Homo sapiens OX=9606 GN=MPO PE=1 SV=1	MPO	83.868	323.31	37.4	27	85	24	1.233	1.237	0.734	1.092	1.107	0.733	1.035	1.14	0.912	1.272	1.244	0.00049631	0.985	0.90044	0.709	1e-32	0.858	0.0005793	1.114	0.0030774	1.085	0.083979
P05165	Propionyl-CoA carboxylase alpha chain, mitochondrial OS=Homo sapiens OX=9606 GN=PCCA PE=1 SV=4	PCCA	80.058	52.225	9.6	6	6	6	1.549	0.756	0.997	1.083	0.764	1.021	1.246	0.652	0.619	1.138	0.606	0.087604	1.038	0.9365	0.8	0.95936	0.952	0.5004	2.027	0.160304	1.16	0.2869
P05166	Propionyl-CoA carboxylase beta chain, mitochondrial OS=Homo sapiens OX=9606 GN=PCCB PE=1 SV=3	PCCB	58.215	19.484	6.7	3	4	3	1.501	0.961	0.946	1.078	0.92	1.168	1.223	0.881	0.644	0.915	0.551	0.064858	1.005	0.88682	0.774	0.157524	1.178	0.040697	1.632	0.056481	1.091	0.32008
P05198	Eukaryotic translation initiation factor 2 subunit 1 OS=Homo sapiens OX=9606 GN=EIF2S1 PE=1 SV=3	EIF2S1	36.112	79.831	26	9	18	9	1	0.786	0.936	1.017	1.011	1.669	0.909	1.075	1.041	0.98	0.624	5.6911e-05	0.847	0.25466	1.03	0.44948	1.038	0.047039	0.989	0.066179	0.731	2.4302e-06
P05204	Non-histone chromosomal protein HMG-17 OS=Homo sapiens OX=9606 GN=HMGN2 PE=1 SV=3	HMGN2	9.3926	6.7533	10	1	3	1	0.97	1.053	0.511	1.674	0.479	1.707	1.001	0.919	0.759	0.994	0.445	0.0056032	0.974	0.93408	0.51	0.0005572	1.684	0.0183636	2.025	0.122682	1.146	0.060083
P05362	Intercellular adhesion molecule 1 OS=Homo sapiens OX=9606 GN=ICAM1 PE=1 SV=2	ICAM1	57.825	21.697	5.1	3	4	3	0.908	0.632	4.485	0.362	0.662	0.345	1.164	0.538	0.235	0.673	0.681	0.15342	1.958	0.77012	3.853	0.00052115	0.538	0.046445	1.372	0.0100561	1.175	0.65558
P05387	60S acidic ribosomal protein P2 OS=Homo sapiens OX=9606 GN=RPLP2 PE=1 SV=1	RPLP2	11.665	96.847	60.9	5	12	5	1.35	1.045	1.031	0.863	0.447	1.692	0.795	1.001	0.381	1.072	0.225	0.00086337	0.933	0.85002	1.297	0.052336	0.805	0.0107369	3.02	0.00168417	1.044	0.57772
P05388	60S acidic ribosomal protein P0 OS=Homo sapiens OX=9606 GN=RPLP0 PE=1 SV=1	RPLP0	34.273	85.358	22.4	6	16	6	1.473	0.945	0.939	0.851	0.362	1.971	0.784	0.893	0.306	1.192	0.155	1.3053e-10	0.868	0.77626	1.198	0.026801	0.714	9.5791e-05	4.069	1.7177e-09	1.058	0.165801
P05455	Lupus La protein OS=Homo sapiens OX=9606 GN=SSB PE=1 SV=2	SSB	46.836	137.56	25.5	14	24	14	1.062	1.153	1.137	0.901	0.761	1.431	0.99	0.901	0.701	1.041	0.49	1.722e-08	0.967	0.84634	1.148	0.0005618	0.866	0.00110136	1.396	0.00023968	1.28	0.077103
P05546	Heparin cofactor 2 OS=Homo sapiens OX=9606 GN=SERPIND1 PE=1 SV=3	SERPIND1	57.07	24.59	5.4	3	5	3	0.727	0.538	1.322	0.895	0.93	1.31	1.617	0.582	1.357	1.195	1.036	0.77012	0.859	0.54838	0.818	0.0137551	0.749	0.037657	0.782	0.74016	0.924	0.82922
P05556	Integrin beta-1 OS=Homo sapiens OX=9606 GN=ITGB1 PE=1 SV=2	ITGB1	88.414	15.866	2.5	2	2	2	1.576	1.655	0.759	0.764	0.75	0.59	1.294	1.214	0.48	1.145	0.814	0.53248	1.048	0.94976	0.587	0.034004	0.667	0.035739	2.101	0.02332	1.363	0.20892
P05771	Protein kinase C beta type OS=Homo sapiens OX=9606 GN=PRKCB PE=1 SV=4	PRKCB	76.868	78.728	13.3	9	13	7	1.202	1.37	0.892	1.057	0.832	1.172	0.955	1.032	0.785	0.845	0.67	0.00026032	1.097	0.51312	0.934	0.1749	1.251	0.0122998	1.445	0.00079951	1.328	0.029562
P06132	Uroporphyrinogen decarboxylase OS=Homo sapiens OX=9606 GN=UROD PE=1 SV=2	UROD	40.786	100.85	24.3	8	22	8	1	1.212	1.201	1.083	1.326	0.517	0.854	1.077	1.918	0.887	3.71	3.6358e-11	1.376	0.119159	1.406	0.000181191	1.221	0.074117	0.754	0.0043218	1.125	0.039597
P06239	Tyrosine-protein kinase Lck OS=Homo sapiens OX=9606 GN=LCK PE=1 SV=6	LCK	58	5.9747	4.3	2	2	1
P06312	Immunoglobulin kappa variable 4-1 OS=Homo sapiens OX=9606 GN=IGKV4-1 PE=1 SV=1	IGKV4-1	13.38	16.62	9.9	1	3	1	0.376	0.129	7.821	0.095	0.26	0.103	0.116	0.383	0.452	0.128	4.388		8.963	0.28794	67.422	0.0057408	0.742	0.69516	1.446	0.50198	0.337	0.4055
P06576	ATP synthase subunit beta, mitochondrial OS=Homo sapiens OX=9606 GN=ATP5F1B PE=1 SV=3	ATP5F1B	56.559	298.99	40.3	16	58	16	0.998	0.87	1.184	0.867	0.843	1.255	1.561	0.736	0.695	0.99	0.554	1.1573e-11	0.857	0.43448	0.758	1.2897e-06	0.876	0.0147358	1.184	0.00054113	1.182	0.0038772
P06702	Protein S100-A9 OS=Homo sapiens OX=9606 GN=S100A9 PE=1 SV=1	S100A9	13.242	230.09	74.6	9	69	9	1.039	2.07	0.694	1.331	1.146	0.456	0.592	1.174	1.06	1.097	2.325	1e-32	1.387	0.24572	1.172	0.006139	1.213	7.8701e-08	0.907	0.00148268	1.763	1e-32
P06703	Protein S100-A6 OS=Homo sapiens OX=9606 GN=S100A6 PE=1 SV=1	S100A6	10.18	36.922	36.7	4	10	4	0.728	1.163	1.106	1.125	2.214	0.374	0.472	1.136	1.508	1.573	4.032	0.00166387	0.976	0.6625	2.343	0.0021369	0.715	0.61944	0.329	0.00059938	1.024	0.98128
P06727	Apolipoprotein A-IV OS=Homo sapiens OX=9606 GN=APOA4 PE=1 SV=3	APOA4	45.398	83.693	22	9	11	9	1.089	0.615	1.544	0.595	1.601	0.361	0.87	1.554	1.231	1.15	3.41	0.28944	0.917	0.9208	1.775	0.0131618	0.517	0.023704	0.68	0.071637	0.396	0.0169808
P06730	Eukaryotic translation initiation factor 4E OS=Homo sapiens OX=9606 GN=EIF4E PE=1 SV=2	EIF4E	25.097	37.559	18.4	3	5	3	1.141	0.82	1.226	0.823	1.125	1.035	1.038	0.947	1.232	0.978	1.19	0.21926	1.023	0.94156	1.181	0.2874	0.842	0.147857	1.014	0.8413	0.866	0.65556
P06733	Alpha-enolase OS=Homo sapiens OX=9606 GN=ENO1 PE=1 SV=2	ENO1	47.168	289.59	41.9	17	65	17	0.733	0.756	1.509	1.251	0.953	1.046	1.119	0.797	1.554	0.944	1.486	1e-32	1.194	0.46958	1.349	1e-32	1.325	1.47515e-12	0.769	2.0329e-09	0.949	0.025398
P06737	Glycogen phosphorylase, liver form OS=Homo sapiens OX=9606 GN=PYGL PE=1 SV=4	PYGL	97.147	220.14	28.8	24	48	20	1.319	1.645	0.574	1.431	0.843	0.744	0.98	1.148	0.604	0.855	0.812	0.00051962	1.219	0.63826	0.586	1.27776e-12	1.674	3.33067e-14	1.565	1.75704e-12	1.433	5.6146e-11
P06744	Glucose-6-phosphate isomerase OS=Homo sapiens OX=9606 GN=GPI PE=1 SV=4	GPI	63.146	88.425	15.1	8	10	8	1.376	1.405	0.736	0.757	1.173	0.882	0.927	1.243	0.676	1.055	0.766	0.00080278	0.938	0.54844	0.794	0.002937	0.718	0.000159377	1.173	1.79263e-05	1.13	0.0182381
P06748	Nucleophosmin OS=Homo sapiens OX=9606 GN=NPM1 PE=1 SV=2	NPM1	32.575	55.517	27.2	9	13	9	0.506	0.434	0.947	0.793	0.421	2.274	1.816	0.444	0.268	1.005	0.118	1.8615e-08	0.495	0.2039	0.521	0.00068123	0.789	0.81662	1.202	0.077241	0.977	0.90676
P06753	Tropomyosin alpha-3 chain OS=Homo sapiens OX=9606 GN=TPM3 PE=1 SV=2	TPM3	32.95	147.77	46	15	34	5	0.678	0.876	1.346	1.199	1.514	0.583	1.128	0.985	1.861	0.879	3.192	1e-32	1.171	0.55218	1.193	0.00064143	1.364	2.68e-08	0.448	6.35525e-12	0.889	0.048043
P06865	Beta-hexosaminidase subunit alpha OS=Homo sapiens OX=9606 GN=HEXA PE=1 SV=2	HEXA	60.702	26.541	8.1	4	7	4	1.183	1.23	0.774	1.053	0.701	1.156	1.205	0.859	0.554	1.411	0.479	0.0058168	0.899	0.56536	0.642	0.0027404	0.746	0.077223	1.688	0.00181775	1.432	0.0092355
P07099	Epoxide hydrolase 1 OS=Homo sapiens OX=9606 GN=EPHX1 PE=1 SV=1	EPHX1	52.948	40.872	16.3	6	9	6	1.327	1.059	1.161	0.646	0.817	1.568	0.919	0.996	0.61	0.899	0.389	0.00055983	0.924	0.62628	1.263	0.0152215	0.719	0.0183567	1.624	0.023542	1.063	0.155155
P07108	Acyl-CoA-binding protein OS=Homo sapiens OX=9606 GN=DBI PE=1 SV=2	DBI	10.044	12.925	27.6	2	2	2	1.326	1.432	0.889	0.635	0.741	1.538	0.832	1.14	0.545	0.961	0.354		0.926	0.63158	1.069		0.661		1.789		1.256
P07195	L-lactate dehydrogenase B chain OS=Homo sapiens OX=9606 GN=LDHB PE=1 SV=2	LDHB	36.638	231.93	35.6	14	61	13	1.108	0.934	0.644	1.06	1.38	0.919	1.163	0.884	1.476	1.231	1.606	1.62448e-12	0.936	0.60402	0.554	1.62448e-12	0.861	0.000100298	0.803	1.3383e-08	1.057	0.0158993
P07203	Glutathione peroxidase 1 OS=Homo sapiens OX=9606 GN=GPX1 PE=1 SV=4	GPX1	22.088	218.11	60.6	9	35	9	0.94	0.786	1.4	0.87	1.945	0.461	0.766	1.086	1.818	1.161	3.944	1e-32	1.073	0.66872	1.828	5.2321e-10	0.749	2.3211e-07	0.483	1.42109e-14	0.724	0.000159799
P07225	Vitamin K-dependent protein S OS=Homo sapiens OX=9606 GN=PROS1 PE=1 SV=1	PROS1	75.122	21.418	4.1	3	3	3	1.058	0.91	0.702	0.842	0.881	1.106	1.88	0.757	1.222	0.782	1.105	0.79784	0.876	0.65686	0.373	0.0171963	1.077	0.49174	1.201	0.34952	1.202	0.63012
P07237	Protein disulfide-isomerase OS=Homo sapiens OX=9606 GN=P4HB PE=1 SV=3	P4HB	57.116	323.31	47.2	26	80	26	1.047	1.232	1.002	1.002	0.575	1.47	0.982	1.036	0.626	1.144	0.426	1.62437e-12	0.943	0.84462	1.02	0.044222	0.876	3.9667e-05	1.821	1.62448e-12	1.189	2.5617e-08
P07305	Histone H1.0 OS=Homo sapiens OX=9606 GN=H1F0 PE=1 SV=3	H1F0	20.863	12.142	9.8	2	3	2	0.944	0.978	0.643	2.417	0.704	1.259	1.199	0.585	0.809	0.736	0.643	0.066324	1.292	0.51394	0.536	0.110882	3.284	0.00092016	1.341	0.20336	1.672	0.108163
P07332	Tyrosine-protein kinase Fes/Fps OS=Homo sapiens OX=9606 GN=FES PE=1 SV=3	FES	93.495	43.372	6.6	5	7	5	1.074	1.773	0.486	1.196	0.919	0.819	0.846	0.94	1.047	1.142	1.278	0.041421	1.195	0.65356	0.574	0.42714	1.047	0.29424	1.169	0.39264	1.886	0.033024
P07339	Cathepsin D OS=Homo sapiens OX=9606 GN=CTSD PE=1 SV=1	CTSD	44.552	42.843	16	5	9	5	1.139	1.562	0.847	0.858	0.842	0.666	0.854	1.49	0.379	1.344	0.569	0.23168	0.921	0.64478	0.992	0.5744	0.638	0.00067921	1.353	0.0082811	1.048	0.90948
P07355	Annexin A2 OS=Homo sapiens OX=9606 GN=ANXA2 PE=1 SV=2	ANXA2	38.604	82.124	29.5	10	15	10	1.131	1.211	0.914	0.834	0.517	2.087	0.857	0.908	0.421	0.832	0.202	1.49658e-13	0.867	0.76038	1.067	0.153903	1.002	0.82388	2.188	2.0726e-05	1.334	4.7088e-06
P07357	Complement component C8 alpha chain OS=Homo sapiens OX=9606 GN=C8A PE=1 SV=2	C8A	65.163	13.436	3.3	2	2	2	0.78	0.476	1.066	0.452	0.68	1.386	2.175	0.841	1.325	1.13	0.956	0.82334	0.66	0.189603	0.49	0.090978	0.4	0.40458	1.147	0.75618	0.566	0.185379
P07358	Complement component C8 beta chain OS=Homo sapiens OX=9606 GN=C8B PE=1 SV=3	C8B	67.046	59.969	8.5	4	4	4	0.985	0.612	1.034	0.863	0.886	1.261	1.678	0.986	1.124	0.945	0.891	0.065182	0.802	0.21838	0.616	0.058738	0.913	0.80668	1.112	0.5367	0.621	0.0195392
P07359	Platelet glycoprotein Ib alpha chain OS=Homo sapiens OX=9606 GN=GP1BA PE=1 SV=2	GP1BA	71.539	29.885	5.2	3	5	3	1.222	1.796	0.421	1.094	0.954	0.484	2.404	0.645	0.442	0.653	0.913	0.99296	0.968	0.98254	0.175	0.000102051	1.675	0.020939	1.281	0.08616	2.784	0.00023806
P07360	Complement component C8 gamma chain OS=Homo sapiens OX=9606 GN=C8G PE=1 SV=3	C8G	22.277	5.8985	4	1	2	1	0.931	0.748	1.012	0.903	0.877	1.415	1.211	1.088	1.154	1.072	0.816	0.173855	0.838	0.139382	0.836	0.43746	0.842	0.5226	1.062	0.7531	0.688	0.22454
P07384	Calpain-1 catalytic subunit OS=Homo sapiens OX=9606 GN=CAPN1 PE=1 SV=1	CAPN1	81.889	203.6	30.7	22	53	22	0.95	1.064	1.111	1.091	1.261	0.783	1.003	1.095	1.585	0.949	2.024	1e-32	1.139	0.30922	1.108	0.00028235	1.15	0.000101906	0.753	5.55112e-16	0.972	0.62198
P07437	Tubulin beta chain OS=Homo sapiens OX=9606 GN=TUBB PE=1 SV=2	TUBB	49.67	63.921	28.4	11	32	2	1.168	1.089	1.301	0.798	1.173	1.23	0.761	1.281	0.693	0.876	0.563		0.949	0.7159	1.71		0.911		0.996		0.85
P07451	Carbonic anhydrase 3 OS=Homo sapiens OX=9606 GN=CA3 PE=1 SV=3	CA3	29.557	72.302	23.8	5	13	5	1.149	0.989	1.759	1.199	1.266	0.384	0.61	1.029	1.751	0.771	4.56	0.0024169	1.686	0.042221	2.884	0.00024133	1.555	0.090596	0.908	0.8678	0.961	0.75584
P07602	Prosaposin OS=Homo sapiens OX=9606 GN=PSAP PE=1 SV=2	PSAP	58.112	20.354	5.5	3	3	3	1.059	1.228	1.076	1.029	0.857	1.167	1.106	1.072	0.785	0.905	0.673	0.193299	1.014	0.9153	0.973	0.80954	1.137	0.161425	1.236	0.53098	1.146	0.192317
P07686	Beta-hexosaminidase subunit beta OS=Homo sapiens OX=9606 GN=HEXB PE=1 SV=3	HEXB	63.111	107.41	15.8	8	13	8	1.39	1.296	0.906	0.862	0.604	0.989	1.272	1.014	0.473	1.093	0.478	0.0038178	0.991	0.84222	0.712	0.0007249	0.789	0.027115	2.301	6.4171e-05	1.278	0.043502
P07737	Profilin-1 OS=Homo sapiens OX=9606 GN=PFN1 PE=1 SV=2	PFN1	15.054	125.36	52.9	7	19	7	1.304	2.497	0.564	1.229	0.627	0.763	0.844	0.886	0.518	0.799	0.679	0.00105682	1.56	0.39816	0.668	1.4868e-08	1.538	3.3169e-09	2.08	4.9853e-08	2.818	1.10645e-12
P07738	Bisphosphoglycerate mutase OS=Homo sapiens OX=9606 GN=BPGM PE=1 SV=2	BPGM	30.005	191.93	34.7	9	18	9	0.875	0.638	1.37	0.473	2.546	0.408	0.484	1.973	1.517	1.067	3.718	1.1586e-07	0.752	0.76632	2.831	1.3877e-06	0.443	1.5096e-06	0.344	3.45435e-12	0.323	2.4978e-09
P07741	Adenine phosphoribosyltransferase OS=Homo sapiens OX=9606 GN=APRT PE=1 SV=2	APRT	19.608	24.08	20	3	3	3	0.993	0.819	0.933	1.125	1.225	1.591	1.056	0.647	1.219	0.762	0.766	0.034639	0.964	0.97788	0.884	0.43224	1.476	0.082077	0.811	0.123518	1.266	0.29266
P07814	Bifunctional glutamate/proline--tRNA ligase OS=Homo sapiens OX=9606 GN=EPRS PE=1 SV=5	EPRS	170.59	280.56	18.7	23	36	22	1.033	0.865	1.083	0.763	0.51	2.038	0.899	0.869	0.497	1.194	0.244	4.70735e-14	0.77	0.48548	1.205	0.00146205	0.639	6.0495e-08	2.025	1.85099e-05	0.995	0.4188
P07858	Cathepsin B OS=Homo sapiens OX=9606 GN=CTSB PE=1 SV=3	CTSB	37.821	27.931	8.6	3	4	3	1.154	1.879	1.37	0.763	0.768	0.748	0.675	1.355	0.435	0.889	0.582	0.024498	1.263	0.60968	2.03	0.0016407	0.858	0.47834	1.503	0.002198	1.387	0.034562
P07900	Heat shock protein HSP 90-alpha OS=Homo sapiens OX=9606 GN=HSP90AA1 PE=1 SV=5	HSP90AA1	84.659	323.31	36.3	29	109	19	0.956	1.157	1.147	1.116	1.111	0.96	0.916	0.985	1.27	0.974	1.323	3.94518e-12	1.142	0.048721	1.252	8.22942e-12	1.146	1.3658e-07	0.86	5.6559e-10	1.175	0.00022293
P07902	Galactose-1-phosphate uridylyltransferase OS=Homo sapiens OX=9606 GN=GALT PE=1 SV=3	GALT	43.363	97.431	17.2	6	9	6	1.123	1.112	1.073	1.109	1.471	0.683	0.847	1.121	1.401	0.878	2.051	0.000157944	1.164	0.22962	1.267	0.0065402	1.263	0.023856	0.763	0.00145748	0.992	0.42606
P07910	Heterogeneous nuclear ribonucleoproteins C1/C2 OS=Homo sapiens OX=9606 GN=HNRNPC PE=1 SV=4	HNRNPC	33.67	96.665	25.8	10	15	10	0.876	0.974	1.028	0.688	0.5	2.503	1.094	0.607	0.494	0.83	0.197	3.073e-09	0.734	0.60564	0.94	0.097958	0.829	0.70774	1.752	0.0075795	1.605	0.41696
P07919	Cytochrome b-c1 complex subunit 6, mitochondrial OS=Homo sapiens OX=9606 GN=UQCRH PE=1 SV=2	UQCRH	10.739	10.453	19.8	1	1	1
P07948	Tyrosine-protein kinase Lyn OS=Homo sapiens OX=9606 GN=LYN PE=1 SV=3	LYN	58.573	48.781	15.6	7	11	6	1.142	1.418	0.775	1.111	1.009	1.167	1.059	0.878	0.652	0.954	0.559	0.00044369	1.006	0.8566	0.732	0.0114436	1.165	0.148599	1.132	0.174958	1.615	0.00158034
P07954	Fumarate hydratase, mitochondrial OS=Homo sapiens OX=9606 GN=FH PE=1 SV=3	FH	54.636	143.88	18.4	7	17	7	1.113	0.691	1.074	0.748	1.653	1.258	0.905	1.018	1.046	1.236	0.831	0.0586	0.77	0.108419	1.187	0.00117812	0.605	6.3388e-07	0.673	5.4073e-07	0.679	1.0298e-06
P07992	DNA excision repair protein ERCC-1 OS=Homo sapiens OX=9606 GN=ERCC1 PE=1 SV=1	ERCC1	32.562	6.5109	3.7	1	1	1
P08047	Transcription factor Sp1 OS=Homo sapiens OX=9606 GN=SP1 PE=1 SV=3	SP1	80.692	17.764	2.5	3	3	3
P08133	Annexin A6 OS=Homo sapiens OX=9606 GN=ANXA6 PE=1 SV=3	ANXA6	75.872	323.31	46.7	33	72	33	1.28	1.682	1.032	1.187	0.662	0.936	0.914	0.91	0.527	0.917	0.563	1.62481e-12	1.316	0.3224	1.129	0.000338	1.294	1.2221e-11	1.934	1.62448e-12	1.848	1e-32
P08174	Complement decay-accelerating factor OS=Homo sapiens OX=9606 GN=CD55 PE=1 SV=4	CD55	41.4	6.9508	2.4	1	1	1	1.155	0.926	1.279	0.569	2.004	0.826	0.65	1.259	0.96	1.325	1.162		0.806	0.48734	1.968		0.429		0.576		0.736
P08195	4F2 cell-surface antigen heavy chain OS=Homo sapiens OX=9606 GN=SLC3A2 PE=1 SV=3	SLC3A2	67.993	87.488	13.2	7	7	7	1.3	1.24	0.945	0.926	0.868	1.024	0.871	1.067	0.651	1.372	0.636	0.0082045	0.973	0.7857	1.085	0.111564	0.675	0.049241	1.498	0.0160849	1.162	0.0187247
P08237	ATP-dependent 6-phosphofructokinase, muscle type OS=Homo sapiens OX=9606 GN=PFKM PE=1 SV=2	PFKM	85.182	234.14	26.8	17	40	14	0.734	0.615	1.338	1.098	1.558	0.872	1.158	0.885	1.656	0.901	1.899	3.64109e-12	1.012	0.90488	1.155	0.00050034	1.219	0.000160028	0.471	1e-32	0.695	0.00026244
P08238	Heat shock protein HSP 90-beta OS=Homo sapiens OX=9606 GN=HSP90AB1 PE=1 SV=4	HSP90AB1	83.263	323.31	38.1	27	96	16	1.118	1.179	1.181	0.929	0.782	1.213	0.779	0.999	0.654	1.301	0.539	2.84395e-12	0.997	0.98474	1.516	1.11022e-15	0.714	2.4365e-11	1.43	1.3784e-06	1.18	2.4889e-06
P08240	Signal recognition particle receptor subunit alpha OS=Homo sapiens OX=9606 GN=SRPRA PE=1 SV=2	SRPRA	69.81	56.788	13.6	8	12	8	1.361	1.174	1.343	0.735	0.624	1.37	1.063	0.762	0.519	1.15	0.379	0.00028291	1.033	0.9821	1.263	0.0117198	0.639	0.0026959	2.181	2.1056e-05	1.541	0.072355
P08243	Asparagine synthetase [glutamine-hydrolyzing] OS=Homo sapiens OX=9606 GN=ASNS PE=1 SV=4	ASNS	64.369	35.252	7.3	4	6	4	0.857	0.599	0.449	0.692	0.644	3.203	0.522	0.975	0.255	1.536	0.08	6.129e-05	0.415	0.093464	0.86	0.65492	0.451	0.0020832	1.331	0.4185	0.614	0.0102588
P08246	Neutrophil elastase OS=Homo sapiens OX=9606 GN=ELANE PE=1 SV=1	ELANE	28.518	15.939	6.7	2	4	2	1.015	1.151	0.698	1.627	1.025	1.162	1.015	0.958	0.808	0.943	0.695	0.36006	1.038	0.98156	0.688	0.095497	1.725	0.191579	0.99	0.99162	1.201	0.45776
P08311	Cathepsin G OS=Homo sapiens OX=9606 GN=CTSG PE=1 SV=2	CTSG	28.837	160.49	28.2	7	38	7	1.375	1.082	0.663	0.972	0.891	0.778	0.847	1.205	0.659	1.446	0.847	0.22858	0.919	0.61626	0.783	0.0139641	0.672	5.6106e-07	1.543	1.4847e-09	0.898	0.63438
P08397	Porphobilinogen deaminase OS=Homo sapiens OX=9606 GN=HMBS PE=1 SV=2	HMBS	39.33	61.41	28	9	12	9	1.074	0.826	1.254	0.83	1.763	0.507	0.798	1.386	1.524	1.067	3.006	3.6602e-10	0.998	0.82176	1.571	0.000117664	0.778	0.020856	0.609	1.87971e-05	0.596	2.1538e-07
P08514	Integrin alpha-IIb OS=Homo sapiens OX=9606 GN=ITGA2B PE=1 SV=3	ITGA2B	113.38	146.06	15.7	13	21	13	1.29	1.884	0.508	1.002	0.725	0.663	2.143	0.672	0.421	0.581	0.635	0.059557	1.067	0.89214	0.237	2.4264e-09	1.725	2.7581e-07	1.779	1.68314e-05	2.804	2.1949e-10
P08559	Pyruvate dehydrogenase E1 component subunit alpha, somatic form, mitochondrial OS=Homo sapiens OX=9606 GN=PDHA1 PE=1 SV=3	PDHA1	43.295	74.816	23.1	9	14	9	1.069	0.725	0.686	0.768	0.78	1.626	1.57	0.842	0.627	1.108	0.386	2.8382e-06	0.654	0.056181	0.437	3.1553e-06	0.693	0.00080136	1.371	0.14138	0.861	0.68822
P08567	Pleckstrin OS=Homo sapiens OX=9606 GN=PLEK PE=1 SV=3	PLEK	40.124	115.43	12	4	6	4	1.196	1.572	0.778	1.079	0.657	0.83	1.514	0.934	0.736	0.809	0.887	0.179236	1.13	0.5473	0.514	2.1452e-05	1.334	0.37124	1.82	0.0181559	1.683	0.0017557
P08571	Monocyte differentiation antigen CD14 OS=Homo sapiens OX=9606 GN=CD14 PE=1 SV=2	CD14	40.076	11.79	4.5	2	2	2	0.982	2.924	0.918	0.892	0.387	0.834	0.6	0.907	0.488	1.14	0.585		1.604	0.3418	1.53		0.782		2.537		3.224
P08574	Cytochrome c1, heme protein, mitochondrial OS=Homo sapiens OX=9606 GN=CYC1 PE=1 SV=3	CYC1	35.422	65.003	13.8	4	12	4	1.03	0.974	0.726	0.915	0.472	1.617	1.804	0.652	0.394	1.204	0.244	1.9528e-07	0.703	0.39478	0.402	5.526e-09	0.76	0.00146166	2.182	4.0313e-05	1.494	0.00093994
P08575	Receptor-type tyrosine-protein phosphatase C OS=Homo sapiens OX=9606 GN=PTPRC PE=1 SV=3	PTPRC	147.48	148.08	11.3	14	24	14	1.243	2.177	0.592	1.364	0.806	0.601	0.878	1.022	0.771	0.863	1.283	0.03322	1.474	0.25298	0.674	3.8333e-07	1.581	7.0637e-08	1.542	8.34e-05	2.13	4.21885e-14
P08579	U2 small nuclear ribonucleoprotein B'' OS=Homo sapiens OX=9606 GN=SNRPB2 PE=1 SV=1	SNRPB2	25.486	45.827	20.9	4	6	3	0.989	1.102	0.843	1.025	0.708	1.852	1.152	0.767	0.669	0.918	0.361	0.0062422	0.858	0.60436	0.732	0.030124	1.117	0.130882	1.397	0.20124	1.437	0.4467
P08582	Melanotransferrin OS=Homo sapiens OX=9606 GN=MELTF PE=1 SV=2	MELTF	80.214	5.8705	1.8	1	1	1	1.081	1.248	1.191	1.118	1.116	0.93	0.949	1.041	0.976	0.882	1.049		1.142	0.057117	1.255		1.268		0.969		1.199
P08590	Myosin light chain 3 OS=Homo sapiens OX=9606 GN=MYL3 PE=1 SV=3	MYL3	21.932	24.232	13.8	3	11	0
P08603	Complement factor H OS=Homo sapiens OX=9606 GN=CFH PE=1 SV=4	CFH	139.09	323.31	25.1	26	38	25	0.892	0.731	0.809	0.937	0.746	1.448	1.454	0.814	1.304	1.196	0.901	0.133498	0.826	0.34528	0.556	1.77636e-15	0.783	0.000122579	1.196	0.0095616	0.898	0.2282
P08621	U1 small nuclear ribonucleoprotein 70 kDa OS=Homo sapiens OX=9606 GN=SNRNP70 PE=1 SV=2	SNRNP70	51.556	84.812	15.6	9	16	9	0.877	1.357	0.937	0.928	0.566	1.889	1.2	0.709	0.395	0.988	0.209	3.1415e-10	0.84	0.60368	0.781	2.1201e-05	0.939	0.8293	1.549	3.8067e-05	1.914	2.8441e-10
P08631	Tyrosine-protein kinase HCK OS=Homo sapiens OX=9606 GN=HCK PE=1 SV=5	HCK	59.599	19.123	7	4	5	3	1.783	1.676	0.561	1.183	0.731	0.839	0.937	1.035	0.629	0.843	0.75	0.24234	1.33	0.5042	0.599	0.081184	1.403	0.066725	2.439	0.112145	1.619	0.08604
P08670	Vimentin OS=Homo sapiens OX=9606 GN=VIM PE=1 SV=4	VIM	53.651	323.31	54.3	33	90	31	0.817	1.827	0.482	0.912	0.598	1.7	1.101	1.051	0.398	0.776	0.234	1.62448e-12	0.849	0.45724	0.438	1e-32	1.175	4.1355e-07	1.366	4.571e-09	1.738	3.33067e-16
P08697	Alpha-2-antiplasmin OS=Homo sapiens OX=9606 GN=SERPINF2 PE=1 SV=3	SERPINF2	54.565	12.788	4.3	2	2	2	1.399	0.603	1.583	0.702	0.865	0.584	0.997	0.826	1.932	1.534	3.308		1.294	0.4761	1.588		0.458		1.617		0.73
P08708	40S ribosomal protein S17 OS=Homo sapiens OX=9606 GN=RPS17 PE=1 SV=2	RPS17	15.55	50.274	23.7	6	11	6	1.3	0.933	0.927	0.864	0.654	1.652	0.856	0.876	0.841	1.184	0.509	8.1583e-05	0.932	0.8604	1.083	0.142556	0.73	9.8861e-05	1.988	0.00032226	1.065	0.7888
P08754	Guanine nucleotide-binding protein G(k) subunit alpha OS=Homo sapiens OX=9606 GN=GNAI3 PE=1 SV=3	GNAI3	40.532	44.587	20.9	7	18	2	0.967	1.56	0.926	1.215	0.85	0.959	0.889	1.139	0.856	1.041	0.893	0.59102	1.132	0.41222	1.042	0.7671	1.167	0.27546	1.138	0.20076	1.37	0.0090792
P08758	Annexin A5 OS=Homo sapiens OX=9606 GN=ANXA5 PE=1 SV=2	ANXA5	35.936	58.53	20.3	7	10	7	1.402	1.445	0.987	0.937	0.782	0.874	0.82	1.277	0.704	1.067	0.805	0.00051917	1.136	0.5206	1.204	0.0107395	0.878	0.030417	1.793	3.9736e-07	1.132	0.0170807
P08865	40S ribosomal protein SA OS=Homo sapiens OX=9606 GN=RPSA PE=1 SV=4	RPSA	32.854	58.579	20.3	6	8	6	1.156	0.924	1.451	0.679	0.647	1.24	0.851	1.163	0.514	1.29	0.415	0.002279	0.91	0.5895	1.705	4.214e-05	0.526	2.8587e-06	1.787	0.022723	0.794	0.20784
P09001	39S ribosomal protein L3, mitochondrial OS=Homo sapiens OX=9606 GN=MRPL3 PE=1 SV=1	MRPL3	38.632	12.913	5.5	2	2	2	0.834	0.754	1.686	0.755	0.6	1.496	1.371	0.79	0.505	1.267	0.338		0.821	0.42296	1.23		0.596		1.39		0.954
P09012	U1 small nuclear ribonucleoprotein A OS=Homo sapiens OX=9606 GN=SNRPA PE=1 SV=3	SNRPA	31.279	60.454	23	7	10	6	0.966	1.184	0.974	0.961	0.631	1.912	1.189	0.78	0.488	0.883	0.255	2.0689e-06	0.848	0.61722	0.819	0.056277	1.088	0.87798	1.531	0.0014782	1.518	0.00022351
P09086	POU domain, class 2, transcription factor 2 OS=Homo sapiens OX=9606 GN=POU2F2 PE=1 SV=3	POU2F2	51.208	6.2275	2.7	1	1	1	0.621	0.737	1.205	0.802		2.002	0.575	0.705		0.904			0.804	0.69494	2.096		0.887				1.045
P09104	Gamma-enolase OS=Homo sapiens OX=9606 GN=ENO2 PE=1 SV=3	ENO2	47.268	51.843	16.1	6	11	6	0.723	0.727	1.017	0.965	1.262	0.858	1.217	1.044	2.208	0.898	2.573	1.167e-06	1.068	0.94248	0.836	0.07392	1.075	0.066216	0.573	3.0678e-07	0.696	0.00025775
P09105	Hemoglobin subunit theta-1 OS=Homo sapiens OX=9606 GN=HBQ1 PE=1 SV=2	HBQ1	15.508	122.02	47.9	6	10	6	0.908	1	1.118	1.144	1.983	0.583	0.716	1.101	1.579	1.002	2.708	1.88327e-05	1.068	0.56044	1.561	0.00048036	1.142	0.111362	0.458	4.3077e-06	0.908	0.037919
P09110	3-ketoacyl-CoA thiolase, peroxisomal OS=Homo sapiens OX=9606 GN=ACAA1 PE=1 SV=2	ACAA1	44.292	16.624	5.2	2	2	2	0.905	0.967	0.723	1.134	0.603	1.797	1.737	0.488	0.774	0.83	0.431	0.0024203	0.825	0.83204	0.416	0.0050164	1.366	0.135475	1.501	0.077444	1.982	0.034861
P09132	Signal recognition particle 19 kDa protein OS=Homo sapiens OX=9606 GN=SRP19 PE=1 SV=3	SRP19	16.156	37.439	20.1	2	3	2	1.181	0.661	0.881	0.664	0.247	3.158	0.606	0.549	0.374	0.663	0.118	0.00178132	0.72	0.9975	1.454	0.054215	1.002	0.98554	4.781		1.204	0.084221
P09211	Glutathione S-transferase P OS=Homo sapiens OX=9606 GN=GSTP1 PE=1 SV=2	GSTP1	23.356	56.889	26.2	4	13	4	1.032	1.046	1.255	0.741	0.984	0.773	0.699	1.843	1.016	1.026	1.314	0.0129806	0.956	0.98824	1.795	8.4452e-07	0.722	4.3669e-05	1.049	0.82578	0.568	9.2737e-07
P09326	CD48 antigen OS=Homo sapiens OX=9606 GN=CD48 PE=1 SV=2	CD48	27.683	10.864	7.8	2	2	2	1.586	1.023	0.683	0.797	0.633	1.345	0.696	1.563	0.508	1.297	0.378		0.831	0.48224	0.981		0.614		2.506		0.655
P09382	Galectin-1 OS=Homo sapiens OX=9606 GN=LGALS1 PE=1 SV=2	LGALS1	14.716	90.725	40.7	6	17	6	0.899	1.413	1.191	0.971	0.429	1.03	0.639	1.911	0.533	0.954	0.517	0.00070214	1.009	0.78672	1.864	1.0053e-08	1.018	0.51152	2.096	0.00054151	0.739	0.00063994
P09417	Dihydropteridine reductase OS=Homo sapiens OX=9606 GN=QDPR PE=1 SV=2	QDPR	25.789	30.374	16.8	3	4	3	0.975	0.796	1.188	0.981	1.824	0.728	1.086	0.779	2.026	0.869	2.783		1.129	0.59902	1.094		1.129		0.535		1.022
P09429	High mobility group protein B1 OS=Homo sapiens OX=9606 GN=HMGB1 PE=1 SV=3	HMGB1	24.893	125.5	38.1	9	22	7	1.048	1.079	0.803	1.164	0.645	1.857	0.962	0.68	0.661	0.901	0.356	1.87e-10	0.943	0.99256	0.835	0.0021794	1.292	0.00022428	1.625	2.004e-05	1.587	1.5962e-06
P09467	Fructose-1,6-bisphosphatase 1 OS=Homo sapiens OX=9606 GN=FBP1 PE=1 SV=5	FBP1	36.842	7.7456	7.4	2	2	1
P09486	SPARC OS=Homo sapiens OX=9606 GN=SPARC PE=1 SV=1	SPARC	34.632	22.981	11.2	3	3	3	1.281	1.496	0.448	0.884	1.058	0.736	2.111	0.882	0.689	0.637	0.936	0.76304	0.885	0.71526	0.212	0.026881	1.388	0.02008	1.211	0.12854	1.696	0.021035
P09493	Tropomyosin alpha-1 chain OS=Homo sapiens OX=9606 GN=TPM1 PE=1 SV=2	TPM1	32.708	68.399	37	11	14	4	0.787	0.779	1.022	1.252	1.38	0.806	1.295	1.1	1.482	0.968	1.839	1.0012e-09	0.959	0.7379	0.789	0.0029646	1.293	0.0058387	0.57	1.7858e-06	0.708	3.5063e-05
P09496	Clathrin light chain A OS=Homo sapiens OX=9606 GN=CLTA PE=1 SV=1	CLTA	27.076	17.736	10.1	3	3	3	0.945	0.856	1.058	0.726	1.282	1.141	1.053	1.193	1.409	1.062	1.235	0.00070073	0.871	0.20818	1.005	0.98466	0.684	0.0135984	0.737	0.048182	0.718	0.175324
P09497	Clathrin light chain B OS=Homo sapiens OX=9606 GN=CLTB PE=1 SV=1	CLTB	25.19	30.304	12.7	4	6	4	1.152	0.913	1.191	0.931	1.301	1.063	1.054	0.945	0.982	1.077	0.924	0.3039	0.95	0.51224	1.13	0.69048	0.864	0.037325	0.885	0.59356	0.966	0.60892
P09525	Annexin A4 OS=Homo sapiens OX=9606 GN=ANXA4 PE=1 SV=4	ANXA4	35.882	66.785	15.4	4	7	4	1.377	1.444	0.747	0.929	1.247	0.643	0.895	1.11	1.181	1.045	1.837	0.0022751	1.149	0.44908	0.835	0.82032	0.889	0.116938	1.104	0.18478	1.301	0.0109784
P09543	2',3'-cyclic-nucleotide 3'-phosphodiesterase OS=Homo sapiens OX=9606 GN=CNP PE=1 SV=2	CNP	47.578	121.62	27.3	14	19	14	0.905	0.822	1.466	1.009	1.332	0.878	1.135	0.897	1.372	0.965	1.563	1.8641e-06	1.07	0.70426	1.292	0.00055653	1.046	0.37398	0.679	1.6166e-09	0.916	0.15994
P09622	Dihydrolipoyl dehydrogenase, mitochondrial OS=Homo sapiens OX=9606 GN=DLD PE=1 SV=2	DLD	54.177	82.07	17.7	8	15	8	1.337	1.092	0.681	0.789	0.694	1.32	1.351	0.867	0.445	1.45	0.337	1.1914e-07	0.765	0.2479	0.504	4.084e-05	0.544	2.9436e-07	1.927	4.7923e-06	1.26	4.2012e-05
P09651	Heterogeneous nuclear ribonucleoprotein A1 OS=Homo sapiens OX=9606 GN=HNRNPA1 PE=1 SV=5	HNRNPA1	38.746	195.82	33.1	10	30	10	0.951	1.078	1.122	0.886	0.615	1.778	0.996	0.727	0.623	0.865	0.35	1.9589e-06	0.936	0.9442	1.127	0.00137732	1.024	0.56006	1.546	0.041617	1.483	0.122001
P09669	Cytochrome c oxidase subunit 6C OS=Homo sapiens OX=9606 GN=COX6C PE=1 SV=2	COX6C	8.7813	19.179	38.7	3	4	3	1.071	1.197	0.74	1.499	0.483	1.328	1.573	0.607	0.418	0.917	0.315	5.9565e-05	1.003	0.97226	0.47	0.00047743	1.635	0.127621	2.217	0.00098475	1.972	0.00033722
P09769	Tyrosine-protein kinase Fgr OS=Homo sapiens OX=9606 GN=FGR PE=1 SV=2	FGR	59.478	16.959	4.3	2	3	2	1.128	1.787	0.711	1.156	0.805	0.957	0.979	0.983	0.867	0.966	0.906		1.204	0.43326	0.726		1.197		1.401		1.818
P09871	Complement C1s subcomponent OS=Homo sapiens OX=9606 GN=C1S PE=1 SV=1	C1S	76.684	65.022	9.9	5	6	5	1.298	0.808	0.813	0.555	0.915	1.028	1.566	0.653	1.477	1.53	1.437		0.87	0.55552	0.519		0.363		1.419		1.237
P09874	Poly [ADP-ribose] polymerase 1 OS=Homo sapiens OX=9606 GN=PARP1 PE=1 SV=4	PARP1	113.08	216.39	16.3	17	21	17	0.481	0.303	1.224	0.546	0.388	4.176	0.741	0.348	0.309	0.701	0.074	2.0567e-11	0.451	0.40082	1.652	1.6562e-09	0.779	0.0039612	1.24	0.0034173	0.871	0.4167
P09913	Interferon-induced protein with tetratricopeptide repeats 2 OS=Homo sapiens OX=9606 GN=IFIT2 PE=1 SV=1	IFIT2	54.632	11.593	4	2	2	2	0.752	0.965	0.696	0.533	1.027	3.128	0.761	0.56	0.457	0.828	0.146	0.28868	0.54	0.20666	0.915	0.91346	0.644	0.30092	0.732	0.71034	1.723	0.78642
P09914	Interferon-induced protein with tetratricopeptide repeats 1 OS=Homo sapiens OX=9606 GN=IFIT1 PE=1 SV=2	IFIT1	55.36	9.3897	2.1	1	1	1	0.91	0.634	1.75	0.419	3.037	0.443	1.875	0.626	0.672	0.722	1.517		0.654	0.5387	0.933		0.58		0.3		1.013
P09917	Arachidonate 5-lipoxygenase OS=Homo sapiens OX=9606 GN=ALOX5 PE=1 SV=2	ALOX5	77.982	83.345	19.4	12	15	12	1.13	2.086	0.685	1.172	0.774	0.781	1.158	0.752	0.56	1	0.717	0.0138182	1.262	0.58448	0.592	4.3824e-06	1.172	0.064121	1.46	2.0771e-05	2.774	6.4058e-10
P09936	Ubiquitin carboxyl-terminal hydrolase isozyme L1 OS=Homo sapiens OX=9606 GN=UCHL1 PE=1 SV=2	UCHL1	24.824	68.84	15.7	3	4	3	0.36	0.171	3.544	0.179	0.242	3.253	0.235	0.656	0.258	0.545	0.079	0.017224	0.915	0.62404	15.081	0.021995	0.328	0.22308	1.488	0.52578	0.261	0.08976
P09960	Leukotriene A-4 hydrolase OS=Homo sapiens OX=9606 GN=LTA4H PE=1 SV=2	LTA4H	69.284	323.31	34.9	17	45	17	0.905	1.128	0.931	1.161	1.295	0.998	1.026	0.811	1.311	1.015	1.314	9.2959e-08	1.057	0.59582	0.907	0.048982	1.144	0.00037587	0.699	2.66454e-15	1.391	1.34415e-12
P09972	Fructose-bisphosphate aldolase C OS=Homo sapiens OX=9606 GN=ALDOC PE=1 SV=2	ALDOC	39.455	209.75	22.5	7	9	6	1.094	1.174	0.831	0.829	1.51	0.856	0.79	0.968	1.183	1.028	1.382	0.131397	0.992	0.96684	1.052	0.3359	0.806	0.25392	0.725	0.152681	1.213	0.170401
P0C0L4	Complement C4-A OS=Homo sapiens OX=9606 GN=C4A PE=1 SV=2	C4A	192.78	-2	17.8	29	43	1	0.735	0.623	0.957	0.469	0.971	0.698	1.201	0.598	2.804	2.437	4.017		0.946	0.72382	0.797		0.192		0.757		1.042
P0C0L5	Complement C4-B OS=Homo sapiens OX=9606 GN=C4B PE=1 SV=2	C4B	192.75	323.31	18.6	30	46	2	1.227	0.381	0.886	0.338	0.41	0.815	1.733	0.411	3.065	1.953	3.761		1.108	0.9765	0.511		0.173		2.993		0.927
P0C7P3	Protein SLFN14 OS=Homo sapiens OX=9606 GN=SLFN14 PE=1 SV=2	SLFN14	103.91	33.512	5.6	5	5	5	1.281	1.358	0.661	1.184	0.493	1.355	0.749	1.257	0.774	1.036	0.571	0.106484	1.075	0.69426	0.883	0.6568	1.143	0.28676	2.598	0.0108637	1.08	0.41804
P0DMV9	Heat shock 70 kDa protein 1B OS=Homo sapiens OX=9606 GN=HSPA1B PE=1 SV=1	HSPA1B	70.051	237.13	33.2	18	45	9	1.001	1.299	1.336	0.93	1.237	0.587	0.697	1.14	1.6	0.968	2.726	3.67484e-14	1.332	0.116837	1.917	4.79106e-12	0.961	0.82544	0.809	2.9919e-06	1.139	0.104458
P0DN76	Splicing factor U2AF 35 kDa subunit-like protein OS=Homo sapiens OX=9606 GN=U2AF1L5 PE=1 SV=1	U2AF1L5	27.872	31.225	17.1	4	5	4	1.04	0.995	1.292	0.785	0.448	1.797	1.145	0.692	0.537	0.881	0.299	0.00183644	0.937	0.9984	1.128	0.180699	0.891	0.63306	2.321	0.04312	1.438	0.85552
P0DOX2	Immunoglobulin alpha-2 heavy chain OS=Homo sapiens OX=9606 PE=1 SV=2	---	48.934	16.284	6.2	3	3	0
P0DOX3	Immunoglobulin delta heavy chain OS=Homo sapiens OX=9606 PE=1 SV=1	---	56.224	95.665	15.8	6	7	6	0.567	0.524	0.464	0.685	0.609	0.554	0.403	0.523	8.307	0.496	14.995	0.00164059	4.08	0.32198	1.151	0.6829	1.381	0.26024	0.931	0.44056	1.002	0.94644
P0DOX5	Immunoglobulin gamma-1 heavy chain OS=Homo sapiens OX=9606 PE=1 SV=2	---	49.328	298.32	38.3	13	47	6	0.229	0.436	0.548	1.046	0.402	2.802	1.944	0.812	0.275	0.488	0.098	4.6686e-10	0.393	0.123201	0.282	1.83331e-12	2.143	1.7852e-07	0.57	0.0113417	0.537	5.854e-07
P0DOX8	Immunoglobulin lambda-1 light chain OS=Homo sapiens OX=9606 PE=1 SV=1	---	22.83	61.561	24.1	4	17	3	0.188	0.409	0.141	7.805	0.15	0.101	0.089	0.119	0.498	0.126	4.931	0.00068196	15.455	0.100176	1.584	0.64194	61.944	5.2491e-07	1.253		3.437	0.00140003
P0DOY3	Immunoglobulin lambda constant 3 OS=Homo sapiens OX=9606 GN=IGLC3 PE=1 SV=1	IGLC3	11.265	42.131	41.5	3	12	2	0.43	0.551	0.301	0.414	0.673	0.47	0.432	0.67	1.26	6.362	2.681		0.343	0.34946	0.697		0.065		0.639		0.822
P0DP08	Immunoglobulin heavy variable 4-38-2 OS=Homo sapiens OX=9606 GN=IGHV4-38-2 PE=3 SV=1	IGHV4-38-2	13.016	55.905	13.7	1	2	1	0.826	0.483	0.371	0.773	1.03	3.454	0.558	0.56	0.747	0.583	0.216	0.30616	0.517	0.32286	0.665	0.91424	1.326		0.802		0.862	0.90604
P0DP25	Calmodulin-3 OS=Homo sapiens OX=9606 GN=CALM3 PE=1 SV=1	CALM3	16.837	154.11	36.9	6	24	6	1.166	1.489	0.785	1.016	0.758	1.355	0.863	1.075	0.768	0.873	0.567	3.1221e-06	1.061	0.76786	0.91	0.045539	1.164	0.00059534	1.538	1.2799e-09	1.385	3.056e-07
P0DPI2	Glutamine amidotransferase-like class 1 domain-containing protein 3A, mitochondrial OS=Homo sapiens OX=9606 GN=GATD3A PE=1 SV=1	GATD3A	28.17	15.886	6.7	2	4	2	1.325	0.721	1.06	0.7	0.781	0.995	2.186	0.735	0.338	1.064	0.34	3.6062e-05	0.719	0.2915	0.485	0.000141842	0.658	0.0068622	1.697	0.0034554	0.981	0.63378
P10109	Adrenodoxin, mitochondrial OS=Homo sapiens OX=9606 GN=FDX1 PE=1 SV=1	FDX1	19.393	6.4167	4.9	1	1	1
P10124	Serglycin OS=Homo sapiens OX=9606 GN=SRGN PE=1 SV=3	SRGN	17.652	6.8425	8.2	1	1	1	0.928	1.4	0.635	1.096	0.633	0.991	1.674	1.099	0.785	0.94	0.792		0.908	0.69226	0.379		1.166		1.466		1.274
P10144	Granzyme B OS=Homo sapiens OX=9606 GN=GZMB PE=1 SV=2	GZMB	27.716	-2	3.2	1	2	1	0.857	0.719	1.43	0.822	1.169	1.306	1.031	0.99	1.417	0.906	1.085		0.971	0.6981	1.387		0.907		0.733		0.726
P10155	60 kDa SS-A/Ro ribonucleoprotein OS=Homo sapiens OX=9606 GN=TROVE2 PE=1 SV=2	TROVE2	60.67	65.996	18.2	9	13	9	0.992	1.171	1.048	0.921	0.554	1.652	0.804	1.048	0.556	0.974	0.337	7.5587e-07	0.932	0.86972	1.303	0.037237	0.946	0.43276	1.791	0.00078205	1.117	0.36958
P10176	Cytochrome c oxidase subunit 8A, mitochondrial OS=Homo sapiens OX=9606 GN=COX8A PE=1 SV=2	COX8A	7.579	6.2055	13	1	1	1	1.17	1.68	0.717	1.021	0.767	0.926	1.091	1.011	0.777	1.152	0.839		1.084	0.80574	0.657		0.886		1.525		1.662
P10253	Lysosomal alpha-glucosidase OS=Homo sapiens OX=9606 GN=GAA PE=1 SV=4	GAA	105.32	27.319	4.5	4	6	4	1.028	1.036	1.065	0.797	0.884	0.912	0.846	1.285	0.698	1.587	0.765	0.16348	0.839	0.3229	1.259	0.37958	0.502	0.00052368	1.163	0.78878	0.806	0.067681
P10316	HLA class I histocompatibility antigen, A-69 alpha chain OS=Homo sapiens OX=9606 GN=HLA-A PE=1 SV=2	HLA-A	40.976	60.198	28.8	9	15	0
P10321	HLA class I histocompatibility antigen, Cw-7 alpha chain OS=Homo sapiens OX=9606 GN=HLA-C PE=1 SV=3	HLA-C	40.648	7.9167	26.8	8	11	1
P10398	Serine/threonine-protein kinase A-Raf OS=Homo sapiens OX=9606 GN=ARAF PE=1 SV=2	ARAF	67.585	23.895	5.4	3	3	2	0.835	1.011	1.284	0.97	0.755	1.664	0.941	0.805	0.876	1.081	0.526	0.20628	0.949	0.89296	1.365	0.50664	0.897	0.59186	1.106	0.79702	1.256	0.7408
P10515	Dihydrolipoyllysine-residue acetyltransferase component of pyruvate dehydrogenase complex, mitochondrial OS=Homo sapiens OX=9606 GN=DLAT PE=1 SV=3	DLAT	68.996	38.365	8.7	6	6	6	1.322	0.613	0.847	0.84	0.753	1.362	2.228	0.61	0.318	0.892	0.233	0.00142209	0.674	0.27948	0.38	0.000139263	0.942	0.77706	1.756	0.00104288	1.005	0.60112
P10599	Thioredoxin OS=Homo sapiens OX=9606 GN=TXN PE=1 SV=3	TXN	11.737	73.93	51.4	7	17	7	0.956	0.933	1.233	0.767	1.731	0.533	0.708	1.641	1.214	1.098	2.278	1.8143e-09	0.894	0.91316	1.742	6.6677e-07	0.699	0.000118585	0.552	2.1765e-05	0.569	3.8629e-05
P10606	Cytochrome c oxidase subunit 5B, mitochondrial OS=Homo sapiens OX=9606 GN=COX5B PE=1 SV=2	COX5B	13.696	37.386	24.8	4	7	4	1.36	1.39	0.759	1.101	0.566	1.044	1.299	0.717	0.455	1.431	0.436	0.027918	1.002	0.94856	0.584	0.008764	0.769	0.0147207	2.403	8.0501e-05	1.939	2.1403e-07
P10619	Lysosomal protective protein OS=Homo sapiens OX=9606 GN=CTSA PE=1 SV=2	CTSA	54.465	28.489	6.7	3	3	3	1.121	1.743	0.621	1.039	0.774	0.878	0.947	1.296	0.573	1.293	0.653	0.045805	0.982	0.73636	0.656	0.096445	0.804	0.036979	1.448	0.0021209	1.345	0.049062
P10620	Microsomal glutathione S-transferase 1 OS=Homo sapiens OX=9606 GN=MGST1 PE=1 SV=1	MGST1	17.598	23.826	8.4	1	2	1	0.927	2.03	0.34	0.888	0.511	2.047	0.844	0.914	0.252	0.93	0.123		0.846	0.47006	0.403		0.955		1.814		2.221
P10643	Complement component C7 OS=Homo sapiens OX=9606 GN=C7 PE=1 SV=2	C7	93.517	7.9629	1.3	1	1	1
P10644	cAMP-dependent protein kinase type I-alpha regulatory subunit OS=Homo sapiens OX=9606 GN=PRKAR1A PE=1 SV=1	PRKAR1A	42.981	145.25	31.2	12	21	10	0.73	0.838	1.366	1.251	1.118	0.916	1.107	1.188	1.397	0.874	1.525	4.416e-07	1.073	0.77708	1.234	4.1145e-05	1.431	1.72017e-05	0.653	2.7165e-07	0.705	3.7356e-05
P10746	Uroporphyrinogen-III synthase OS=Homo sapiens OX=9606 GN=UROS PE=1 SV=1	UROS	28.627	183.31	44.5	8	14	8	1.031	1.429	1.047	1.027	0.773	0.826	0.611	1.198	1.209	0.889	1.464	0.0062613	1.337	0.042218	1.714	0.003441	1.155	0.031703	1.334	0.055038	1.193	0.077458
P10768	S-formylglutathione hydrolase OS=Homo sapiens OX=9606 GN=ESD PE=1 SV=2	ESD	31.462	124.45	28	7	20	7	0.777	0.783	1.435	0.872	1.607	0.673	0.728	1.045	1.77	0.983	2.63	1.02363e-13	1.119	0.66872	1.971	0.0011393	0.887	0.028856	0.484	1.315e-07	0.749	0.29932
P10809	60 kDa heat shock protein, mitochondrial OS=Homo sapiens OX=9606 GN=HSPD1 PE=1 SV=2	HSPD1	61.054	296.5	35.4	19	40	19	0.847	0.683	1.584	0.872	0.669	1.364	1.316	0.702	0.484	1.554	0.355	5.6102e-10	0.798	0.38134	1.204	0.0008175	0.561	9.49385e-12	1.266	0.0197424	0.973	0.27172
P10909	Clusterin OS=Homo sapiens OX=9606 GN=CLU PE=1 SV=1	CLU	52.494	95.652	16.5	8	15	8	1.099	0.816	1.212	0.827	0.851	1.022	1.404	0.793	1.296	1.113	1.268	0.021637	1.013	0.91422	0.863	0.080175	0.743	0.00188438	1.291	0.00066409	1.029	0.29956
P11021	Endoplasmic reticulum chaperone BiP OS=Homo sapiens OX=9606 GN=HSPA5 PE=1 SV=2	HSPA5	72.332	323.31	45.6	30	89	29	1.049	0.746	1.033	0.699	0.575	2.365	0.751	0.664	0.618	1.024	0.261	1e-32	0.771	0.62902	1.375	1.0071e-10	0.683	1.11022e-16	1.824	5.43099e-12	1.123	0.069363
P11055	Myosin-3 OS=Homo sapiens OX=9606 GN=MYH3 PE=1 SV=3	MYH3	223.9	-2	1	2	2	1
P11142	Heat shock cognate 71 kDa protein OS=Homo sapiens OX=9606 GN=HSPA8 PE=1 SV=1	HSPA8	70.897	323.31	41	27	109	19	0.944	0.859	1.362	0.832	1.471	0.701	0.725	1.374	1.792	0.943	2.556	1e-32	1.11	0.63568	1.879	1.62448e-12	0.882	0.0013357	0.642	1e-32	0.625	1.62448e-12
P11166	Solute carrier family 2, facilitated glucose transporter member 1 OS=Homo sapiens OX=9606 GN=SLC2A1 PE=1 SV=2	SLC2A1	54.083	229.61	13.8	8	50	8	0.71	0.736	1.159	1.213	1.322	1.065	1.316	0.728	1.573	0.966	1.477	2.77556e-15	0.999	0.9022	0.881	0.041838	1.256	2.3085e-05	0.537	1e-32	1.011	0.96234
P11169	Solute carrier family 2, facilitated glucose transporter member 3 OS=Homo sapiens OX=9606 GN=SLC2A3 PE=1 SV=1	SLC2A3	53.924	13.958	3.6	2	2	2	1.556	1.518	0.554	1.234	0.831	1.017	1.176	0.789	0.825	0.764	0.811		1.243	0.47752	0.471		1.615		1.872		1.924
P11171	Protein 4.1 OS=Homo sapiens OX=9606 GN=EPB41 PE=1 SV=4	EPB41	97.016	323.31	34	30	120	27	0.669	0.625	1.202	1.198	1.417	0.832	1.078	0.981	1.948	0.869	2.341	1.62448e-12	1.09	0.94694	1.115	1.6776e-07	1.379	6.8066e-07	0.472	1e-32	0.637	1.6198e-09
P11172	Uridine 5'-monophosphate synthase OS=Homo sapiens OX=9606 GN=UMPS PE=1 SV=1	UMPS	52.221	41.738	11.2	6	7	6	1.269	1.024	0.861	0.937	1.253	1.133	1.273	0.986	0.694	0.928	0.613	0.02372	0.859	0.20048	0.676	0.199824	1.01	0.95266	1.013	0.67068	1.039	0.49278
P11177	Pyruvate dehydrogenase E1 component subunit beta, mitochondrial OS=Homo sapiens OX=9606 GN=PDHB PE=1 SV=3	PDHB	39.233	27.589	9.7	3	5	3	1.058	0.658	0.421	0.749	0.603	1.985	1.81	0.576	0.491	1.211	0.247	0.0088825	0.546	0.125736	0.233	0.0199031	0.618	0.00191932	1.755	0.894	1.142	0.90384
P11182	Lipoamide acyltransferase component of branched-chain alpha-keto acid dehydrogenase complex, mitochondrial OS=Homo sapiens OX=9606 GN=DBT PE=1 SV=3	DBT	53.486	20.741	6	3	3	3	0.843	0.89	1.12	1.075	0.719	1.805	1.133	0.81	0.556	1.083	0.308		0.808	0.3792	0.989		0.993		1.172		1.099
P11215	Integrin alpha-M OS=Homo sapiens OX=9606 GN=ITGAM PE=1 SV=2	ITGAM	127.18	189.09	17.7	17	23	17	1.12	1.684	0.758	1.245	0.968	0.696	0.888	1.201	0.742	1.002	1.066	0.4158	1.167	0.5171	0.854	0.0129402	1.243	0.032418	1.157	0.21672	1.402	4.6713e-07
P11216	Glycogen phosphorylase, brain form OS=Homo sapiens OX=9606 GN=PYGB PE=1 SV=5	PYGB	96.695	95.03	18.3	14	22	10	1.427	1.132	1.229	0.953	1.022	1.053	1.002	0.995	0.72	0.92	0.684	0.071201	1.094	0.61838	1.227	0.075882	1.036	0.168318	1.396	0.065301	1.138	0.090361
P11233	Ras-related protein Ral-A OS=Homo sapiens OX=9606 GN=RALA PE=1 SV=1	RALA	23.567	28.368	22.3	4	4	3	0.785	0.706	1.539	0.946	1.57	0.763	1.071	1.046	1.615	1.057	2.117	0.00068266	1.015	0.9363	1.437	0.002357	0.895	0.38526	0.5	0.00164176	0.675	0.055055
P11234	Ras-related protein Ral-B OS=Homo sapiens OX=9606 GN=RALB PE=1 SV=1	RALB	23.408	37.091	19.9	3	3	2
P11277	Spectrin beta chain, erythrocytic OS=Homo sapiens OX=9606 GN=SPTB PE=1 SV=5	SPTB	246.47	323.31	51.8	122	501	114	0.782	0.889	0.941	1.299	1.67	0.686	1.097	1.127	1.465	1.011	2.136	1e-32	0.962	0.88352	0.858	1e-32	1.285	1e-32	0.468	1e-32	0.789	1e-32
P11279	Lysosome-associated membrane glycoprotein 1 OS=Homo sapiens OX=9606 GN=LAMP1 PE=1 SV=3	LAMP1	44.882	12.024	2.6	1	1	1	1.306	1.559	0.755	0.757	0.864	0.679	0.907	1.842	0.512	1.132	0.754		0.901	0.64934	0.832		0.669		1.512		0.846
P11310	Medium-chain specific acyl-CoA dehydrogenase, mitochondrial OS=Homo sapiens OX=9606 GN=ACADM PE=1 SV=1	ACADM	46.588	103.14	21.9	9	13	9	1.002	0.749	1.072	0.793	0.711	1.281	1.923	0.699	0.506	1.425	0.395	3.8213e-05	0.683	0.196581	0.557	0.0048768	0.556	3.4021e-06	1.409	0.00169516	1.072	0.9059
P11387	DNA topoisomerase 1 OS=Homo sapiens OX=9606 GN=TOP1 PE=1 SV=2	TOP1	90.725	18.399	3.9	3	3	3
P11388	DNA topoisomerase 2-alpha OS=Homo sapiens OX=9606 GN=TOP2A PE=1 SV=3	TOP2A	174.38	-2	2.4	4	4	1	1.001	1.081	0.498	1.392	1.012	1.443	1.207	1.3	0.463	0.718	0.321		0.781	0.252	0.413		1.939		0.989		0.832
P11413	Glucose-6-phosphate 1-dehydrogenase OS=Homo sapiens OX=9606 GN=G6PD PE=1 SV=4	G6PD	59.256	287.82	41.7	18	37	18	0.982	1.53	0.868	1.107	1.005	0.808	0.934	1.114	1.062	1.083	1.314	5.1304e-07	1.122	0.37848	0.929	0.0024041	1.022	0.74462	0.977	0.3239	1.373	7.08911e-12
P11441	Ubiquitin-like protein 4A OS=Homo sapiens OX=9606 GN=UBL4A PE=1 SV=1	UBL4A	17.776	13.478	17.8	2	2	2
P11488	Guanine nucleotide-binding protein G(t) subunit alpha-1 OS=Homo sapiens OX=9606 GN=GNAT1 PE=1 SV=5	GNAT1	40.04	-2	8.3	3	6	1	1.124	0.756	1.404	0.862	1.624	0.833	0.752	0.989	1.792	0.976	2.151		1.148	0.55718	1.867		0.883		0.692		0.764
P11498	Pyruvate carboxylase, mitochondrial OS=Homo sapiens OX=9606 GN=PC PE=1 SV=2	PC	129.63	60.751	6.4	5	6	5	1.03	0.981	1.138	0.84	1.017	1.629	0.876	0.812	0.886	0.842	0.544	0.106541	0.942	0.83688	1.299	0.056402	0.998	0.51024	1.013	0.5401	1.208	0.93748
P11586	C-1-tetrahydrofolate synthase, cytoplasmic OS=Homo sapiens OX=9606 GN=MTHFD1 PE=1 SV=3	MTHFD1	101.56	255.73	26.6	23	46	22	0.951	0.845	0.957	1.216	1.456	1.273	0.852	1.024	0.944	1.053	0.742	0.000199361	0.868	0.26734	1.123	0.005718	1.155	7.6066e-05	0.653	1.63325e-12	0.825	0.0028963
P11678	Eosinophil peroxidase OS=Homo sapiens OX=9606 GN=EPX PE=1 SV=2	EPX	81.04	78.72	16.1	11	19	8	1.71	1.064	0.555	1.344	0.782	0.462	0.773	1.642	0.517	1.311	1.119	0.33622	1.044	0.92682	0.718	0.0181218	1.025	0.33056	2.187	0.00024105	0.648	3.9686e-05
P11717	Cation-independent mannose-6-phosphate receptor OS=Homo sapiens OX=9606 GN=IGF2R PE=1 SV=3	IGF2R	274.37	81.394	4.3	10	11	10	0.983	1.978	0.797	1.145	0.785	0.99	0.924	0.828	0.578	0.921	0.584	0.023003	1.232	0.57994	0.863	0.170358	1.243	0.0163987	1.252	0.02332	2.389	1.5198e-06
P11766	Alcohol dehydrogenase class-3 OS=Homo sapiens OX=9606 GN=ADH5 PE=1 SV=4	ADH5	39.724	44.31	18.2	7	12	7	1.104	1.051	1.202	0.952	0.985	1.019	0.967	1.139	1.149	0.987	1.128	0.4365	1.071	0.21454	1.243	0.0194245	0.965	0.116905	1.121	0.85412	0.923	0.070205
P11908	Ribose-phosphate pyrophosphokinase 2 OS=Homo sapiens OX=9606 GN=PRPS2 PE=1 SV=2	PRPS2	34.769	79.68	25.2	7	12	2	0.876	1.031	1.315	0.97	1.293	0.885	0.936	0.863	1.9	0.924	2.147		1.243	0.26442	1.405		1.05		0.677		1.195
P11940	Polyadenylate-binding protein 1 OS=Homo sapiens OX=9606 GN=PABPC1 PE=1 SV=2	PABPC1	70.67	246.71	25.8	17	34	10	1.222	1.244	1.104	0.993	0.697	0.926	0.872	1.231	0.685	1.133	0.74	0.026403	1.08	0.62692	1.266	0.026282	0.876	0.127197	1.753	0.00041631	1.011	0.5324
P12004	Proliferating cell nuclear antigen OS=Homo sapiens OX=9606 GN=PCNA PE=1 SV=1	PCNA	28.768	80.492	34.5	8	13	8	1.21	1.56	1.042	0.921	0.585	1.146	0.787	1.098	0.37	1.239	0.323	1.9597e-06	1.051	0.9625	1.324	0.00095624	0.743	0.000104255	2.068	0.000183498	1.421	9.8824e-05
P12081	Histidine--tRNA ligase, cytoplasmic OS=Homo sapiens OX=9606 GN=HARS PE=1 SV=2	HARS	57.41	95.252	23.8	13	14	9	1.307	1.236	0.995	1.083	0.852	0.97	0.949	0.997	0.596	1.216	0.614	0.01156	1.047	0.91102	1.048	0.54646	0.891	0.072622	1.534	0.0094565	1.24	0.0155447
P12235	ADP/ATP translocase 1 OS=Homo sapiens OX=9606 GN=SLC25A4 PE=1 SV=4	SLC25A4	33.064	15.661	24.2	7	11	2	1.061	0.428	1.022	0.764	0.618	2.488	1.212	0.692	0.448	1.098	0.18	3.7467e-05	0.61	0.20222	0.843	0.024401	0.696	0.064317	1.717	0.144601	0.618	0.057237
P12236	ADP/ATP translocase 3 OS=Homo sapiens OX=9606 GN=SLC25A6 PE=1 SV=4	SLC25A6	32.866	36.634	30.5	9	15	2	0.918	0.865	1.326	0.958	0.603	2.12	0.671	0.692	0.683	1.192	0.322	0.186701	0.9	0.98414	1.976	0.125381	0.804	0.37952	1.522	0.139616	1.25	0.46542
P12259	Coagulation factor V OS=Homo sapiens OX=9606 GN=F5 PE=1 SV=4	F5	251.7	81.511	4.6	10	7	6	0.921	1.178	0.65	0.977	0.856	0.84	2.374	0.78	1.018	0.822	1.212	0.74598	0.836	0.71366	0.274	0.0050012	1.189	0.37696	1.076	0.81662	1.51	0.050041
P12268	Inosine-5'-monophosphate dehydrogenase 2 OS=Homo sapiens OX=9606 GN=IMPDH2 PE=1 SV=2	IMPDH2	55.804	245.81	25.5	11	17	10	0.852	1.143	1.006	0.899	0.704	1.378	1.035	1.165	0.531	1.278	0.385	4.0376e-05	0.797	0.2228	0.972	0.86082	0.703	0.00115751	1.21	0.030496	0.981	0.44064
P12270	Nucleoprotein TPR OS=Homo sapiens OX=9606 GN=TPR PE=1 SV=3	TPR	267.29	163.46	7.6	19	20	19	1.174	1.309	0.847	0.876	0.618	1.578	1.258	0.768	0.514	0.887	0.326	1.3007e-11	0.924	0.76982	0.673	1.7429e-06	0.988	0.17134	1.9	1.94061e-05	1.704	0.000179785
P12429	Annexin A3 OS=Homo sapiens OX=9606 GN=ANXA3 PE=1 SV=3	ANXA3	36.375	128.26	35.6	10	20	10	1.135	2.021	0.636	0.965	0.987	0.468	0.626	1.577	0.921	1.266	1.968	0.000103215	1.153	0.59502	1.016	0.8317	0.762	0.00025914	1.15	0.111096	1.282	0.0186412
P12694	2-oxoisovalerate dehydrogenase subunit alpha, mitochondrial OS=Homo sapiens OX=9606 GN=BCKDHA PE=1 SV=2	BCKDHA	50.47	57.871	18.9	7	8	7	1.174	0.703	1.179	0.73	0.789	1.42	1.043	0.808	0.594	1.156	0.418	0.071395	0.84	0.3205	1.13	0.171117	0.631	0.022856	1.488	0.79036	0.87	0.51792
P12724	Eosinophil cationic protein OS=Homo sapiens OX=9606 GN=RNASE3 PE=1 SV=2	RNASE3	18.385	57.804	27.5	5	9	5	1.193	1.335	0.545	1.343	1.099	0.907	0.896	1.192	0.711	1.239	0.784	0.046762	0.961	0.64868	0.608	0.0069597	1.084	0.165303	1.086	0.088038	1.12	0.27706
P12814	Alpha-actinin-1 OS=Homo sapiens OX=9606 GN=ACTN1 PE=1 SV=2	ACTN1	103.06	323.31	44.5	38	101	25	1.094	2.304	0.57	1.206	0.695	0.643	1.037	1.028	0.571	0.912	0.888	0.104101	1.331	0.57296	0.55	1e-32	1.322	3.10862e-15	1.574	1.64035e-12	2.241	1e-32
P12829	Myosin light chain 4 OS=Homo sapiens OX=9606 GN=MYL4 PE=1 SV=3	MYL4	21.564	158.45	53.3	10	20	8	0.844	0.903	0.805	0.979	1.126	1.163	1.159	1.242	1.355	0.996	1.165	0.031719	0.859	0.130378	0.695	1.78668e-05	0.983	0.53998	0.75	0.0004164	0.727	2.3026e-08
P12882	Myosin-1 OS=Homo sapiens OX=9606 GN=MYH1 PE=1 SV=3	MYH1	223.14	-2	0.8	2	2	1
P12883	Myosin-7 OS=Homo sapiens OX=9606 GN=MYH7 PE=1 SV=5	MYH7	223.09	-2	1	2	2	1
P12931	Proto-oncogene tyrosine-protein kinase Src OS=Homo sapiens OX=9606 GN=SRC PE=1 SV=3	SRC	59.834	6.2655	3.4	2	3	0
P12955	Xaa-Pro dipeptidase OS=Homo sapiens OX=9606 GN=PEPD PE=1 SV=3	PEPD	54.548	154.87	19.7	8	12	8	0.873	1.021	1.434	0.793	1.513	0.494	0.705	1.515	1.735	0.972	3.512	3.6066e-05	1.126	0.55262	2.034	0.00033649	0.816	0.078104	0.577	0.00056426	0.674	0.0013012
P12956	X-ray repair cross-complementing protein 6 OS=Homo sapiens OX=9606 GN=XRCC6 PE=1 SV=2	XRCC6	69.842	224.39	20	11	26	11	1.101	1.211	1	1.062	0.563	1.264	1.187	0.853	0.544	1.066	0.43	1.0483e-08	0.997	0.99784	0.842	0.0020029	0.996	0.47038	1.956	2.0198e-06	1.42	2.5706e-08
P13010	X-ray repair cross-complementing protein 5 OS=Homo sapiens OX=9606 GN=XRCC5 PE=1 SV=3	XRCC5	82.704	108.35	14.1	7	11	7	1.111	1.147	1.123	1.068	0.566	1.325	1.245	0.808	0.562	1.054	0.424	0.00023921	1.003	0.94264	0.902	0.69874	1.013	0.8764	1.963	0.00056004	1.42	0.052439
P13073	Cytochrome c oxidase subunit 4 isoform 1, mitochondrial OS=Homo sapiens OX=9606 GN=COX4I1 PE=1 SV=1	COX4I1	19.576	143.94	38.5	6	18	6	1.165	1.493	0.976	1.088	0.587	0.845	1.266	0.89	0.464	1.448	0.549	0.00077852	1.03	0.96504	0.771	2.3353e-05	0.751	3.5612e-09	1.985	3.061e-07	1.678	6.82565e-13
P13224	Platelet glycoprotein Ib beta chain OS=Homo sapiens OX=9606 GN=GP1BB PE=1 SV=1	GP1BB	21.717	12.165	5.3	1	2	1	1.297	1.606	0.674	0.967	1.109	0.728	1.739	0.648	0.952	0.677	1.308		1.121	0.5535	0.388		1.428		1.17		2.478
P13284	Gamma-interferon-inducible lysosomal thiol reductase OS=Homo sapiens OX=9606 GN=IFI30 PE=1 SV=3	IFI30	27.963	12.548	9.2	2	4	2	1.113	2.313	0.893	1.008	0.87	0.825	0.94	0.826	0.546	0.89	0.662	0.29274	1.35	0.46822	0.95	0.8712	1.133	0.42816	1.279	0.42734	2.8	0.087283
P13489	Ribonuclease inhibitor OS=Homo sapiens OX=9606 GN=RNH1 PE=1 SV=2	RNH1	49.973	323.31	34.9	14	34	14	0.845	0.971	1.119	1.147	1.36	0.806	1.004	1.096	1.411	0.973	1.751	7.8207e-10	1.048	0.7068	1.115	0.110917	1.179	1.6284e-07	0.621	4.12514e-12	0.886	0.084764
P13498	Cytochrome b-245 light chain OS=Homo sapiens OX=9606 GN=CYBA PE=1 SV=3	CYBA	21.012	24.272	17.9	3	5	3	1.186	1.553	0.687	1.632	0.634	1.307	0.971	0.663	0.762	0.905	0.583	0.00124108	1.299	0.31908	0.708	0.116024	1.803	0.0050837	1.871	0.0141626	2.342	0.000159752
P13501	C-C motif chemokine 5 OS=Homo sapiens OX=9606 GN=CCL5 PE=1 SV=3	CCL5	9.9896	17.629	18.7	3	3	3	0.925	1.288	0.558	1.104	0.449	0.74	3.307	0.548	0.265	0.548	0.358		0.74	0.82512	0.169		2.015		2.06		2.35
P13591	Neural cell adhesion molecule 1 OS=Homo sapiens OX=9606 GN=NCAM1 PE=1 SV=3	NCAM1	94.573	6.8878	1.3	1	1	1
P13612	Integrin alpha-4 OS=Homo sapiens OX=9606 GN=ITGA4 PE=1 SV=3	ITGA4	114.9	21.303	2.8	3	3	3	1.429	1.191	1.536	0.652	0.92	0.75	0.855	1.325	0.695	1.055	0.927		1.122	0.733	1.796		0.618		1.553		0.899
P13639	Elongation factor 2 OS=Homo sapiens OX=9606 GN=EEF2 PE=1 SV=4	EEF2	95.337	323.31	31	31	70	31	1.389	1.286	1.012	0.697	0.584	1.386	0.575	1.239	0.418	1.388	0.302	1.62448e-12	0.928	0.78876	1.76	1e-32	0.502	1e-32	2.378	1e-32	1.038	0.50248
P13667	Protein disulfide-isomerase A4 OS=Homo sapiens OX=9606 GN=PDIA4 PE=1 SV=2	PDIA4	72.932	323.31	42.2	27	89	27	1.298	0.809	0.872	0.921	0.462	1.82	1.054	1.018	0.454	1.023	0.249	1.62437e-12	0.81	0.54302	0.827	6.7379e-11	0.9	0.000181076	2.81	1e-32	0.795	5.1632e-10
P13671	Complement component C6 OS=Homo sapiens OX=9606 GN=C6 PE=1 SV=3	C6	104.79	24.892	3.6	4	4	4	0.718	0.465	1.111	0.872	0.983	1.215	1.347	1.07	1.382	1.508	1.137		0.743	0.120342	0.825		0.578		0.73		0.435
P13674	Prolyl 4-hydroxylase subunit alpha-1 OS=Homo sapiens OX=9606 GN=P4HA1 PE=1 SV=2	P4HA1	61.049	14.918	4.5	2	2	2	1.119	0.818	0.784	0.943	0.689	1.439	1.621	0.934	0.801	0.974	0.557		0.789	0.27396	0.484		0.968		1.624		0.876
P13693	Translationally-controlled tumor protein OS=Homo sapiens OX=9606 GN=TPT1 PE=1 SV=1	TPT1	19.595	36.46	22.7	3	5	3	1.233	1.494	1.203	1.18	1.043	0.577	0.647	1.192	1.092	0.892	1.893	0.0047807	1.425	0.030884	1.859	0.0110816	1.323	0.063561	1.182	0.117421	1.253	0.045856
P13716	Delta-aminolevulinic acid dehydratase OS=Homo sapiens OX=9606 GN=ALAD PE=1 SV=1	ALAD	36.294	262.23	39.7	16	105	16	0.823	0.89	1.098	1.239	1.46	0.682	0.873	1.154	1.837	0.905	2.694	1.62448e-12	1.16	0.4866	1.258	1.11022e-16	1.369	1.2958e-06	0.564	1.62448e-12	0.771	9.8192e-05
P13727	Bone marrow proteoglycan OS=Homo sapiens OX=9606 GN=PRG2 PE=1 SV=2	PRG2	25.205	19.02	9.5	2	2	2	2.176	1.199	0.65	0.894	0.939	0.396	0.667	1.718	0.609	1.249	1.538	0.69444	1.112	0.75704	0.975	0.91986	0.716	0.124458	2.317	0.093599	0.698	0.21666
P13746	HLA class I histocompatibility antigen, A-11 alpha chain OS=Homo sapiens OX=9606 GN=HLA-A PE=1 SV=1	HLA-A	40.936	61.046	23.8	8	12	2	1.214	0.847	3.198	0.801	0.725	0.402	0.522	1.418	0.869	0.536	2.162	0.165341	1.923	0.115301	6.126	0.0133199	1.494	0.35194	1.674	0.22278	0.597	0.044322
P13747	HLA class I histocompatibility antigen, alpha chain E OS=Homo sapiens OX=9606 GN=HLA-E PE=1 SV=3	HLA-E	40.156	35.818	18.7	6	6	4	1.984	1.721	0.849	0.945	0.566	0.891	1.183	0.876	0.389	0.554	0.437	0.137045	1.447	0.44546	0.718	0.161143	1.706	0.038484	3.505	0.028183	1.965	0.043516
P13796	Plastin-2 OS=Homo sapiens OX=9606 GN=LCP1 PE=1 SV=6	LCP1	70.288	323.31	43.7	23	67	18	1.121	1.851	0.784	1.262	0.894	0.579	0.884	1.219	0.89	0.928	1.537	2.6985e-09	1.312	0.2235	0.887	0.028496	1.36	1.2164e-07	1.254	5.9473e-05	1.518	4.12004e-13
P13798	Acylamino-acid-releasing enzyme OS=Homo sapiens OX=9606 GN=APEH PE=1 SV=4	APEH	81.224	301.23	24.2	18	67	18	0.833	0.952	1.166	1.063	1.44	0.786	1.051	1.062	1.629	0.974	2.073	1.62448e-12	1.062	0.73346	1.109	0.00092342	1.091	0.0129834	0.578	1.62448e-12	0.896	0.0034202
P13804	Electron transfer flavoprotein subunit alpha, mitochondrial OS=Homo sapiens OX=9606 GN=ETFA PE=1 SV=1	ETFA	35.079	111.05	33.3	8	12	8	1.242	0.737	0.844	0.893	0.62	2.13	0.608	0.842	0.779	1.234	0.366	3.5023e-05	0.827	0.73726	1.388	0.080584	0.724	0.000181044	2.003	1.0444e-06	0.875	0.53234
P13807	Glycogen [starch] synthase, muscle OS=Homo sapiens OX=9606 GN=GYS1 PE=1 SV=2	GYS1	83.785	58.5	10.2	7	8	7	1.093	1.303	0.801	1.003	0.974	1.031	0.918	1.091	0.694	1.208	0.673	0.0111808	0.937	0.50334	0.873	0.139283	0.83	0.052182	1.122	0.022619	1.194	0.0120205
P13861	cAMP-dependent protein kinase type II-alpha regulatory subunit OS=Homo sapiens OX=9606 GN=PRKAR2A PE=1 SV=2	PRKAR2A	45.518	64.394	22	8	12	7	1.482	1.084	1.13	0.91	0.734	1.033	1.069	1.075	0.666	1.104	0.645	0.00052206	1.051	0.86446	1.057	0.132463	0.824	0.104738	2.019	5.4094e-08	1.008	0.93602
P13987	CD59 glycoprotein OS=Homo sapiens OX=9606 GN=CD59 PE=1 SV=1	CD59	14.177	48.542	24.2	4	8	4	0.789	0.666	1.593	0.714	2.472	0.446	0.859	1.404	1.192	1.131	2.673	3.5403e-06	0.785	0.66074	1.854	3.4023e-07	0.631	0.000120242	0.319	5.4518e-09	0.474	2.398e-06
P14091	Cathepsin E OS=Homo sapiens OX=9606 GN=CTSE PE=1 SV=3	CTSE	42.793	10.857	4	2	2	2	1.213	1.303	1.191	0.904	1.193	0.388	1.087	1.076	1.293	1.192	3.332	0.0096189	1.196	0.33886	1.096	0.5642	0.758	0.062721	1.017	0.61468	1.211	0.0077172
P14174	Macrophage migration inhibitory factor OS=Homo sapiens OX=9606 GN=MIF PE=1 SV=4	MIF	12.476	7.0831	7.8	1	1	1	0.932	0.785	0.982	0.938	1.077	1.374	1.074	1.186	1.247	0.926	0.908		0.866	0.177184	0.914		1.013		0.865		0.662
P14209	CD99 antigen OS=Homo sapiens OX=9606 GN=CD99 PE=1 SV=1	CD99	18.848	10.986	5.4	1	2	1	0.764	0.455	3.447	0.812	0.455	0.376	0.541	2.169	1.045	0.49	2.779		1.618	0.3409	6.372		1.657		1.679		0.21
P14222	Perforin-1 OS=Homo sapiens OX=9606 GN=PRF1 PE=1 SV=1	PRF1	61.377	56.232	10.5	5	5	5	1.104	1.191	0.833	1.306	0.436	0.958	1.458	1.002	0.553	1.233	0.577	0.028423	0.98	0.97014	0.571	0.031159	1.059	0.60552	2.532	0.0032367	1.189	0.3345
P14314	Glucosidase 2 subunit beta OS=Homo sapiens OX=9606 GN=PRKCSH PE=1 SV=2	PRKCSH	59.425	196.19	28.4	15	30	15	1.491	0.864	0.898	0.736	0.476	1.732	1.224	0.842	0.463	1.011	0.267	5.16254e-14	0.842	0.5996	0.734	2.2844e-08	0.728	5.5999e-09	3.132	2.3156e-10	1.026	0.46518
P14317	Hematopoietic lineage cell-specific protein OS=Homo sapiens OX=9606 GN=HCLS1 PE=1 SV=3	HCLS1	54.013	36.422	10.1	5	7	5	1.279	1.264	1.131	1.083	0.794	1.042	0.947	0.851	1.056	0.977	1.013	0.65604	1.261	0.0059011	1.194	0.56118	1.108	0.20834	1.611	0.033401	1.485	0.0109598
P14324	Farnesyl pyrophosphate synthase OS=Homo sapiens OX=9606 GN=FDPS PE=1 SV=4	FDPS	48.275	73.44	16.2	7	11	7	1.102	1.254	0.791	1.005	1.143	0.914	0.94	0.937	1.075	1.34	1.176	0.0141426	0.991	0.93734	0.841	0.00123573	0.75	0.00144087	0.964	0.27252	1.338	0.00064017
P14406	Cytochrome c oxidase subunit 7A2, mitochondrial OS=Homo sapiens OX=9606 GN=COX7A2 PE=1 SV=1	COX7A2	9.3959	13.53	27.7	2	4	2	1.182	1.571	0.921	0.81	0.414	0.996	1.47	0.801	0.439	1.434	0.441	0.154383	0.962	0.93376	0.627	0.085484	0.565	0.093461	2.855	0.03486	1.961	0.0071248
P14543	Nidogen-1 OS=Homo sapiens OX=9606 GN=NID1 PE=1 SV=3	NID1	136.38	6.1411	0.9	1	1	1
P14550	Alcohol dehydrogenase [NADP(+)] OS=Homo sapiens OX=9606 GN=AKR1A1 PE=1 SV=3	AKR1A1	36.573	65.975	21.5	6	7	6	1.321	0.778	1.286	0.665	1.327	0.886	0.705	1.479	1.047	1.015	1.182	0.058178	0.942	0.76046	1.824	0.00022368	0.655	1.66641e-05	0.995	0.9757	0.526	2.0793e-06
P14598	Neutrophil cytosol factor 1 OS=Homo sapiens OX=9606 GN=NCF1 PE=1 SV=4	NCF1	44.681	158.04	29.2	11	19	11	1.305	1.746	0.669	1.171	0.861	0.733	1.083	0.997	0.73	1.003	0.996	0.84748	1.202	0.5237	0.618	1.6545e-06	1.167	0.00121918	1.516	5.6788e-07	1.751	2.109e-10
P14618	Pyruvate kinase PKM OS=Homo sapiens OX=9606 GN=PKM PE=1 SV=4	PKM	57.936	273.76	41.6	21	51	20	1.112	1.588	0.819	1.26	0.799	0.744	1.011	1.088	0.694	1.091	0.933	0.66822	1.156	0.51696	0.81	0.011397	1.155	0.0026439	1.392	0.00038341	1.46	1.0106e-09
P14625	Endoplasmin OS=Homo sapiens OX=9606 GN=HSP90B1 PE=1 SV=1	HSP90B1	92.468	323.31	39.4	36	134	35	2.213	0.618	0.897	0.584	0.429	1.917	0.774	0.76	0.395	0.994	0.206	1.62437e-12	0.966	0.78706	1.159	3.8973e-05	0.588	1.62437e-12	5.159	1.62437e-12	0.813	9.583e-05
P14735	Insulin-degrading enzyme OS=Homo sapiens OX=9606 GN=IDE PE=1 SV=4	IDE	117.97	243.23	22.4	24	41	24	1.013	1.053	1.177	1.029	1.568	0.62	0.797	1.245	1.431	1.121	2.308	1e-32	1.066	0.56094	1.477	2.85549e-12	0.918	0.036604	0.646	4.68736e-13	0.846	0.00346
P14770	Platelet glycoprotein IX OS=Homo sapiens OX=9606 GN=GP9 PE=1 SV=3	GP9	19.046	14.159	10.2	2	2	2
P14780	Matrix metalloproteinase-9 OS=Homo sapiens OX=9606 GN=MMP9 PE=1 SV=3	MMP9	78.457	211.87	29.8	19	31	19	0.998	1.596	0.634	1.337	0.856	1.482	0.764	0.947	0.702	0.687	0.474	1.62781e-12	1.112	0.72332	0.83	0.00026227	1.946	1.0746e-11	1.166	0.00125584	1.685	1.2559e-07
P14854	Cytochrome c oxidase subunit 6B1 OS=Homo sapiens OX=9606 GN=COX6B1 PE=1 SV=2	COX6B1	10.192	17.782	33.7	3	3	3	1.213	1.731	0.849	0.611	0.609	1.104	1.043	1.064	0.388	1.474	0.351	0.2123	0.905	0.53776	0.814	0.122957	0.415	0.0144164	1.992	0.116701	1.627	0.148763
P14866	Heterogeneous nuclear ribonucleoprotein L OS=Homo sapiens OX=9606 GN=HNRNPL PE=1 SV=2	HNRNPL	64.132	164.9	28.4	12	32	12	1.08	1.159	0.942	0.885	0.679	1.76	1.207	0.765	0.58	0.943	0.33	3.55271e-15	0.868	0.61784	0.78	3.7275e-05	0.938	0.5602	1.591	1.2852e-10	1.515	2.7935e-06
P14868	Aspartate--tRNA ligase, cytoplasmic OS=Homo sapiens OX=9606 GN=DARS PE=1 SV=2	DARS	57.136	323.31	47.1	22	38	22	1.055	0.84	1.073	0.942	1.087	1.137	0.942	0.988	1.322	1.117	1.163	0.00102124	0.993	0.85066	1.139	0.00087972	0.843	0.0033775	0.971	0.149425	0.85	0.00198439
P14923	Junction plakoglobin OS=Homo sapiens OX=9606 GN=JUP PE=1 SV=3	JUP	81.744	22.251	5.8	4	4	4	1.054	1.155	0.62	1.062	0.985	1.111	1.322	1.237	0.772	1.008	0.695	0.152742	0.823	0.140139	0.469	0.09942	1.054	0.98598	1.07	0.160896	0.934	0.67722
P14927	Cytochrome b-c1 complex subunit 7 OS=Homo sapiens OX=9606 GN=UQCRB PE=1 SV=2	UQCRB	13.53	20.288	20.7	2	5	2	1.226	1.162	0.991	0.741	0.964	0.9	1.319	0.993	0.799	1.536	0.888	0.67528	0.861	0.33336	0.751	0.0176776	0.482	0.037542	1.272	0.50666	1.17	0.032643
P15056	Serine/threonine-protein kinase B-raf OS=Homo sapiens OX=9606 GN=BRAF PE=1 SV=4	BRAF	84.436	13.706	4.2	3	3	1	1.132	1.214	0.931	1.064	0.907	1.106	1.109	0.982	0.82	1.093	0.741		0.993	0.87204	0.839		0.973		1.248		1.236
P15104	Glutamine synthetase OS=Homo sapiens OX=9606 GN=GLUL PE=1 SV=4	GLUL	42.064	55.832	19.6	7	11	7	1.067	1.268	1.193	0.905	0.986	0.965	0.974	1.064	1.171	0.774	1.213	0.29882	1.177	0.076458	1.225	0.42502	1.169	0.32588	1.082	0.95108	1.192	0.103482
P15121	Aldose reductase OS=Homo sapiens OX=9606 GN=AKR1B1 PE=1 SV=3	AKR1B1	35.853	42.396	13.6	4	4	4	1.087	1.075	0.887	0.777	1.219	1.043	0.769	1.43	1.152	1.247	1.105	0.66032	0.872	0.35746	1.153	0.193559	0.623	0.057799	0.892	0.90518	0.752	0.040635
P15153	Ras-related C3 botulinum toxin substrate 2 OS=Homo sapiens OX=9606 GN=RAC2 PE=1 SV=1	RAC2	21.429	6.6604	29.2	6	10	1	1.141	1.481	1.003	0.891	0.75	0.917	1.034	0.925	1.042	1.265	1.136	0.99104	1.136	0.32204	0.97	0.8306	0.704	0.247	1.521	0.129895	1.601	0.157399
P15169	Carboxypeptidase N catalytic chain OS=Homo sapiens OX=9606 GN=CPN1 PE=1 SV=1	CPN1	52.286	10.145	2.2	1	1	1	0.979	0.702	1.163	0.71	0.891	1.524	0.976	0.842	1.029	1.63	0.675		0.782	0.22482	1.192		0.436		1.099		0.834
P15170	Eukaryotic peptide chain release factor GTP-binding subunit ERF3A OS=Homo sapiens OX=9606 GN=GSPT1 PE=1 SV=1	GSPT1	55.755	90.908	17.2	10	16	10	0.965	0.838	0.944	0.843	0.907	1.634	0.816	1.063	0.956	1.171	0.585	0.02114	0.813	0.22212	1.157	0.6915	0.72	0.026479	1.064	0.52354	0.788	0.124564
P15289	Arylsulfatase A OS=Homo sapiens OX=9606 GN=ARSA PE=1 SV=3	ARSA	53.588	23.209	7.9	3	3	3	1.039	1.119	1.178	1.204	0.564	1.082	1.023	1.434	0.711	0.841	0.657	0.40148	1.062	0.64018	1.152	0.41338	1.432	0.175998	1.842	0.181898	0.78	0.055715
P15311	Ezrin OS=Homo sapiens OX=9606 GN=EZR PE=1 SV=4	EZR	69.412	92.896	25.6	17	40	9	0.97	0.968	1.386	1.314	0.959	0.901	0.777	1.055	0.923	1.122	1.024	0.933	1.155	0.23624	1.784	6.6025e-11	1.171	0.00080068	1.011	0.113637	0.918	0.56008
P15374	Ubiquitin carboxyl-terminal hydrolase isozyme L3 OS=Homo sapiens OX=9606 GN=UCHL3 PE=1 SV=1	UCHL3	26.182	167.78	33.9	9	22	9	0.921	0.951	1.237	1.146	1.238	0.793	0.92	0.958	1.84	0.857	2.32	2.5143e-11	1.279	0.160121	1.345	8.7595e-09	1.337	0.00127913	0.744	1.52631e-05	0.993	0.25684
P15498	Proto-oncogene vav OS=Homo sapiens OX=9606 GN=VAV1 PE=1 SV=4	VAV1	98.313	66.432	10.7	9	11	9	1.092	1.308	0.74	0.959	0.661	1.593	0.998	1.037	0.543	0.956	0.341	2.221e-06	0.885	0.55652	0.741	0.000161996	1.003	0.3646	1.652	1.68545e-05	1.261	0.00031798
P15531	Nucleoside diphosphate kinase A OS=Homo sapiens OX=9606 GN=NME1 PE=1 SV=1	NME1	17.149	50.153	46.1	7	39	2	0.812	0.802	1.375	1.019	1.714	0.505	0.688	1.144	1.612	1.023	3.192	1.1008e-06	1.108	0.57138	1.999	0.00026273	0.996	0.049957	0.474	0.0028811	0.701	0.025797
P15735	Phosphorylase b kinase gamma catalytic chain, liver/testis isoform OS=Homo sapiens OX=9606 GN=PHKG2 PE=1 SV=1	PHKG2	46.442	18.611	6.4	3	3	3	1.211	1.247	0.851	0.938	1.157	1.039	0.982	1.127	0.892	1.038	0.859		0.962	0.57346	0.867		0.904		1.047		1.106
P15848	Arylsulfatase B OS=Homo sapiens OX=9606 GN=ARSB PE=1 SV=1	ARSB	59.687	6.6325	2.1	1	1	1
P15880	40S ribosomal protein S2 OS=Homo sapiens OX=9606 GN=RPS2 PE=1 SV=2	RPS2	31.324	68.262	30.4	8	14	8	1.515	0.77	0.959	0.602	0.524	1.682	0.753	1.027	0.399	1.731	0.237	1.145e-07	0.743	0.38392	1.274	0.0044815	0.348	7.5511e-07	2.891	1.0407e-07	0.75	0.0092232
P15907	Beta-galactoside alpha-2,6-sialyltransferase 1 OS=Homo sapiens OX=9606 GN=ST6GAL1 PE=1 SV=1	ST6GAL1	46.604	11.818	3.7	1	1	1	1.338	0.781	1.15	0.706	0.699	1.48	1.246	1.027	0.751	0.942	0.507		0.876	0.47852	0.923		0.749		1.914		0.76
P15924	Desmoplakin OS=Homo sapiens OX=9606 GN=DSP PE=1 SV=3	DSP	331.77	40.842	2	6	6	6	0.864	0.915	0.664	1.121	1.491	0.766	1.235	1.274	1.179	1.356	1.539	0.0101834	0.775	0.142876	0.538	0.0183596	0.827	0.74438	0.579	0.00034457	0.718	0.04336
P15927	Replication protein A 32 kDa subunit OS=Homo sapiens OX=9606 GN=RPA2 PE=1 SV=1	RPA2	29.247	10.923	6.3	2	2	2	1.004	1.19	1.455	0.851	0.652	1.008	1.048	1.141	0.515	1.366	0.511	0.0015433	0.962	0.7575	1.388	0.4823	0.623	0.043916	1.54	0.171941	1.043	0.93672
P15954	Cytochrome c oxidase subunit 7C, mitochondrial OS=Homo sapiens OX=9606 GN=COX7C PE=1 SV=1	COX7C	7.2454	16.464	28.6	2	5	2	1.268	1.436	1.053	1.047	0.453	1.234	1.527	0.703	0.376	0.979	0.305	0.053481	1.058	0.87952	0.69	0.00153823	1.069	0.63864	2.799	0.003239	2.043	0.0192011
P16050	Arachidonate 15-lipoxygenase OS=Homo sapiens OX=9606 GN=ALOX15 PE=1 SV=3	ALOX15	74.804	25.161	5.4	3	4	3	1.429	1.822	0.573	0.973	0.903	0.723	0.848	1.371	0.569	1.121	0.787	0.59718	1.081	0.98238	0.676	0.176604	0.868	0.68786	1.583	0.133337	1.329	0.177455
P16070	CD44 antigen OS=Homo sapiens OX=9606 GN=CD44 PE=1 SV=3	CD44	81.537	11.067	2.3	2	2	2
P16083	Ribosyldihydronicotinamide dehydrogenase [quinone] OS=Homo sapiens OX=9606 GN=NQO2 PE=1 SV=5	NQO2	25.918	39.777	17.3	3	5	3	1.122	0.928	0.603	1.185	1.229	0.61	0.505	1.443	1.716	1.795	2.813	0.04744	0.995	0.86524	1.194	0.165176	0.66	0.032239	0.913	0.24872	0.643	0.170643
P16109	P-selectin OS=Homo sapiens OX=9606 GN=SELP PE=1 SV=3	SELP	90.833	9.3134	1.7	1	1	1	1.284	1.394	1.105	0.692	0.892	0.534	2.049	1.098	0.502	0.604	0.94		0.961	0.97016	0.539		1.146		1.439		1.27
P16150	Leukosialin OS=Homo sapiens OX=9606 GN=SPN PE=1 SV=1	SPN	40.321	6.9481	3	1	1	1
P16152	Carbonyl reductase [NADPH] 1 OS=Homo sapiens OX=9606 GN=CBR1 PE=1 SV=3	CBR1	30.375	71.938	28.9	6	7	4	1.02	0.886	1.28	0.632	1.312	1.258	0.816	0.817	1.525	1.226	1.212	0.133435	0.984	0.843	1.569	0.00195756	0.515	0.0028041	0.777	0.152339	1.084	0.28854
P16157	Ankyrin-1 OS=Homo sapiens OX=9606 GN=ANK1 PE=1 SV=3	ANK1	206.26	323.31	47.1	82	353	79	0.605	0.568	1.154	1.39	1.41	0.826	1.175	0.729	2.264	0.873	2.741	1e-32	1.193	0.80878	0.982	1e-32	1.592	1e-32	0.429	1e-32	0.779	1e-32
P16188	HLA class I histocompatibility antigen, A-30 alpha chain OS=Homo sapiens OX=9606 GN=HLA-A PE=1 SV=2	HLA-A	40.904	16.485	23	7	9	0
P16219	Short-chain specific acyl-CoA dehydrogenase, mitochondrial OS=Homo sapiens OX=9606 GN=ACADS PE=1 SV=1	ACADS	44.297	94.959	22.1	7	12	7	1.822	1.129	0.916	0.93	0.667	1.006	1.006	0.907	0.662	1.139	0.658	0.0105447	1.155	0.60572	0.911	0.38588	0.817	0.028597	2.732	2.006e-05	1.245	0.0036976
P16278	Beta-galactosidase OS=Homo sapiens OX=9606 GN=GLB1 PE=1 SV=2	GLB1	76.074	18.444	4.1	2	3	2	1.023	1.572	1.04	0.868	0.618	1.216	1.036	1.036	0.313	1.322	0.257		0.921	0.58528	1.004		0.657		1.655		1.517
P16284	Platelet endothelial cell adhesion molecule OS=Homo sapiens OX=9606 GN=PECAM1 PE=1 SV=2	PECAM1	82.521	6.1741	1.5	1	1	1
P16333	Cytoplasmic protein NCK1 OS=Homo sapiens OX=9606 GN=NCK1 PE=1 SV=1	NCK1	42.864	19.359	7.2	3	4	3	1.068	1.043	1.19	0.956	0.809	1.331	0.847	1.086	0.894	1.115	0.672	0.136836	0.993	0.96228	1.405	0.043621	0.857	0.06852	1.32	0.147479	0.96	0.76298
P16383	GC-rich sequence DNA-binding factor 2 OS=Homo sapiens OX=9606 GN=GCFC2 PE=1 SV=2	GCFC2	89.384	9.02	1.9	1	1	1	0.882	0.899	1.177	1.136	0.916	1.542	0.922	0.863	1.052	0.991	0.682		0.983	0.99822	1.277		1.146		0.963		1.042
P16401	Histone H1.5 OS=Homo sapiens OX=9606 GN=HIST1H1B PE=1 SV=3	HIST1H1B	22.58	60.722	22.6	7	18	6	1.175	0.703	0.525	2.335	0.557	1.014	1.676	0.585	0.861	0.745	0.849	0.0059997	1.223	0.65872	0.313	1.11378e-12	3.134	9.07452e-12	2.11	1.084e-09	1.202	0.00126178
P16402	Histone H1.3 OS=Homo sapiens OX=9606 GN=HIST1H1D PE=1 SV=2	HIST1H1D	22.35	50.681	22.6	6	9	1	1.573	0.428	0.597	1.649	0.273	0.992	2.754	0.397	0.663	0.567	0.668		0.985	0.70254	0.217		2.908		5.762		1.078
P16403	Histone H1.2 OS=Homo sapiens OX=9606 GN=HIST1H1C PE=1 SV=2	HIST1H1C	21.364	6.7393	23.9	6	9	1
P16435	NADPH--cytochrome P450 reductase OS=Homo sapiens OX=9606 GN=POR PE=1 SV=2	POR	76.689	41.336	8.7	6	7	6	1.073	1.512	0.762	1.034	0.6	1.267	1.226	0.899	0.467	1.126	0.369	0.0021439	0.947	0.71384	0.622	0.0027163	0.918	0.82106	1.788	0.077377	1.682	0.00596
P16452	Erythrocyte membrane protein band 4.2 OS=Homo sapiens OX=9606 GN=EPB42 PE=1 SV=3	EPB42	77.008	323.31	31.5	23	76	23	0.692	0.632	1	1.433	1.369	0.953	1.255	0.641	2.116	0.883	2.22	1.62448e-12	1.151	0.79234	0.797	4.8032e-10	1.623	1e-32	0.505	1.62437e-12	0.986	0.80754
P16455	Methylated-DNA--protein-cysteine methyltransferase OS=Homo sapiens OX=9606 GN=MGMT PE=1 SV=1	MGMT	21.646	24.431	17.4	3	3	3	0.974	0.564	2.303	0.688	0.687	1.661	1.229	0.623	0.476	0.781	0.287	0.125479	1.005	0.774	1.874	0.052541	0.881	0.25704	1.418	0.40954	0.905	0.76554
P16615	Sarcoplasmic/endoplasmic reticulum calcium ATPase 2 OS=Homo sapiens OX=9606 GN=ATP2A2 PE=1 SV=1	ATP2A2	114.76	155.59	16.6	17	24	11	1.158	0.802	1.043	0.708	0.531	1.928	0.996	0.921	0.488	1.25	0.253	3.1517e-09	0.746	0.36222	1.047	0.57046	0.566	3.3754e-07	2.181	1.2221e-08	0.871	0.32004
P16671	Platelet glycoprotein 4 OS=Homo sapiens OX=9606 GN=CD36 PE=1 SV=2	CD36	53.053	10.814	3.2	2	2	2
P16885	1-phosphatidylinositol 4,5-bisphosphate phosphodiesterase gamma-2 OS=Homo sapiens OX=9606 GN=PLCG2 PE=1 SV=4	PLCG2	147.87	157.27	16	18	19	18	1.721	1.174	0.761	0.927	0.806	1.04	1.081	1.04	0.643	0.921	0.618	5.8499e-07	1.069	0.95484	0.704	6.9483e-10	1.007	0.72122	2.135	1.79856e-14	1.129	0.022501
P16949	Stathmin OS=Homo sapiens OX=9606 GN=STMN1 PE=1 SV=3	STMN1	17.302	48.199	45	7	10	5	1.225	1.494	0.879	0.792	0.682	1.167	0.779	0.988	0.755	1.153	0.647	0.00193881	1.079	0.72636	1.128	0.91496	0.687	0.0072394	1.796	0.029622	1.512	0.022121
P16989	Y-box-binding protein 3 OS=Homo sapiens OX=9606 GN=YBX3 PE=1 SV=4	YBX3	40.089	6.4315	9.1	3	5	1
P17028	Zinc finger protein 24 OS=Homo sapiens OX=9606 GN=ZNF24 PE=1 SV=4	ZNF24	42.155	6.7769	2.4	1	1	1
P17066	Heat shock 70 kDa protein 6 OS=Homo sapiens OX=9606 GN=HSPA6 PE=1 SV=2	HSPA6	71.027	15.566	14.8	9	26	1	0.97	0.961	1.277	0.823	1.042	1.207	0.781	1.014	1.364	1.073	1.13	0.99592	1.054	0.71658	1.635	0.00133601	0.767	0.0026351	0.931	0.43574	0.948	0.26278
P17096	High mobility group protein HMG-I/HMG-Y OS=Homo sapiens OX=9606 GN=HMGA1 PE=1 SV=3	HMGA1	11.676	12.598	15.9	2	3	2	0.887	0.567	0.724	1.12	0.64	2.362	1.555	0.524	0.605	0.686	0.256	0.00138314	0.677	0.45876	0.466	0.0020621	1.633	0.0179193	1.386	0.099097	1.082	0.5924
P17174	Aspartate aminotransferase, cytoplasmic OS=Homo sapiens OX=9606 GN=GOT1 PE=1 SV=3	GOT1	46.247	44.797	14.5	6	7	6	0.96	0.665	0.957	0.478	2.839	0.766	0.854	1.612	1.274	1.064	1.663	0.0027162	0.607	0.181924	1.121	0.025856	0.449	0.00030206	0.338	0.00046413	0.413	0.034881
P17213	Bactericidal permeability-increasing protein OS=Homo sapiens OX=9606 GN=BPI PE=1 SV=4	BPI	53.899	130.75	24.4	10	17	10	0.694	0.872	0.585	2.48	1.106	1.254	1.118	0.495	1.119	0.887	0.892	0.129816	1.183	0.8145	0.523	2.3564e-09	2.796	1.0657e-10	0.627	1.7863e-07	1.762	0.000101914
P17252	Protein kinase C alpha type OS=Homo sapiens OX=9606 GN=PRKCA PE=1 SV=4	PRKCA	76.749	7.9907	2.8	3	3	1
P17480	Nucleolar transcription factor 1 OS=Homo sapiens OX=9606 GN=UBTF PE=1 SV=1	UBTF	89.405	7.0756	1.3	1	1	1
P17568	NADH dehydrogenase [ubiquinone] 1 beta subcomplex subunit 7 OS=Homo sapiens OX=9606 GN=NDUFB7 PE=1 SV=4	NDUFB7	16.402	33.299	32.1	4	5	4	1.326	1.108	0.781	1.013	0.507	1.427	1.392	0.643	0.445	1.352	0.312	6.3727e-05	0.878	0.72742	0.561	0.00078345	0.749	0.00045948	2.615	0.033198	1.723	5.8295e-05
P17612	cAMP-dependent protein kinase catalytic subunit alpha OS=Homo sapiens OX=9606 GN=PRKACA PE=1 SV=2	PRKACA	40.589	25.763	14.8	5	11	2	0.981	1.107	1.01	0.886	1.046	0.827	1.004	1.166	0.996	1.235	1.204	0.115982	0.944	0.52924	1.006	0.7119	0.717	0.093522	0.938	0.90848	0.949	0.79484
P17655	Calpain-2 catalytic subunit OS=Homo sapiens OX=9606 GN=CAPN2 PE=1 SV=6	CAPN2	79.994	61.776	11	7	9	7	1.081	1.5	0.691	1.088	1.104	1.66	0.604	0.827	0.682	0.924	0.411	0.0026209	0.985	0.98814	1.144	0.49946	1.177	0.039722	0.979	0.74008	1.814	0.00025968
P17693	HLA class I histocompatibility antigen, alpha chain G OS=Homo sapiens OX=9606 GN=HLA-G PE=1 SV=1	HLA-G	38.224	9.5133	9.5	3	4	1	1.167	0.626	1.769	0.95	0.801	1.514	0.717	1.141	0.55	0.938	0.363		0.99	0.80398	2.467		1.013		1.457		0.549
P17812	CTP synthase 1 OS=Homo sapiens OX=9606 GN=CTPS1 PE=1 SV=2	CTPS1	66.69	52.703	14.7	9	13	7	0.833	1.051	0.836	1.14	1.303	1.369	0.904	1.191	0.959	0.968	0.701	0.20456	0.84	0.13892	0.925	0.6727	1.178	0.0158605	0.639	8.1675e-05	0.882	0.142163
P17844	Probable ATP-dependent RNA helicase DDX5 OS=Homo sapiens OX=9606 GN=DDX5 PE=1 SV=1	DDX5	69.147	59.37	21.2	14	22	9	0.968	0.872	1.113	0.931	0.689	2.085	1.217	0.719	0.484	0.898	0.232	1.157e-09	0.779	0.45526	0.915	0.43388	1.037	0.4182	1.405	0.0125202	1.213	0.191039
P17858	ATP-dependent 6-phosphofructokinase, liver type OS=Homo sapiens OX=9606 GN=PFKL PE=1 SV=6	PFKL	85.018	307.8	26	20	48	15	0.857	0.929	1.188	1.22	1.064	0.853	1.012	1.078	1.388	0.947	1.627	1.50842e-05	1.127	0.31394	1.174	0.070341	1.288	0.00117937	0.805	0.0163356	0.862	0.178422
P17927	Complement receptor type 1 OS=Homo sapiens OX=9606 GN=CR1 PE=1 SV=3	CR1	223.66	16.158	2.3	2	2	2	1.118	1.399	0.859	1.276	1.075	0.873	0.927	0.754	1.388	1.049	1.59		1.291	0.056579	0.927		1.216		1.04		1.855
P17931	Galectin-3 OS=Homo sapiens OX=9606 GN=LGALS3 PE=1 SV=5	LGALS3	26.152	64.168	18.4	4	11	4	0.98	1.103	1.06	1.035	1.177	1.046	1.044	1.097	1.184	0.974	1.132	0.068201	1.004	0.92316	1.015	0.65764	1.063	0.3806	0.833	0.067101	1.005	0.58284
P17947	Transcription factor PU.1 OS=Homo sapiens OX=9606 GN=SPI1 PE=1 SV=2	SPI1	31.083	7.0325	3.7	1	1	1	1.143	1.668	0.582	1.41	0.794	0.929	1.002	0.862	0.995	1.038	1.071		1.254	0.41168	0.581		1.358		1.44		1.935
P17980	26S proteasome regulatory subunit 6A OS=Homo sapiens OX=9606 GN=PSMC3 PE=1 SV=3	PSMC3	49.203	298.56	38.5	16	52	16	0.821	0.861	1.191	1.055	1.408	0.887	1.059	1.05	1.535	1.011	1.731	1e-32	1.009	0.9668	1.125	0.00057731	1.044	0.134877	0.583	1e-32	0.82	0.00014007
P17987	T-complex protein 1 subunit alpha OS=Homo sapiens OX=9606 GN=TCP1 PE=1 SV=1	TCP1	60.343	186.99	32.4	18	42	18	0.735	0.895	1.01	1.018	1.46	1.084	1.079	1.173	1.155	0.976	1.065	0.0031768	0.834	0.109538	0.936	0.5337	1.043	0.2618	0.503	1e-32	0.763	5.2759e-07
P18031	Tyrosine-protein phosphatase non-receptor type 1 OS=Homo sapiens OX=9606 GN=PTPN1 PE=1 SV=1	PTPN1	49.966	102.69	27.6	10	12	10	1.166	1.233	0.801	0.902	0.641	1.401	0.957	1.11	0.585	1.278	0.418	3.6916e-05	0.87	0.4902	0.837	0.0029205	0.706	0.0003011	1.819	0.012684	1.111	0.0137834
P18054	Arachidonate 12-lipoxygenase, 12S-type OS=Homo sapiens OX=9606 GN=ALOX12 PE=1 SV=4	ALOX12	75.693	6.0929	1.8	1	1	1	1.098	1.428	1.055	0.887	1.121	0.832	1.3	0.822	0.897	1.045	1.078		1.048	0.7147	0.812		0.849		0.979		1.737
P18077	60S ribosomal protein L35a OS=Homo sapiens OX=9606 GN=RPL35A PE=1 SV=2	RPL35A	12.538	30.009	27.3	4	11	4	1.567	0.762	0.81	0.643	0.413	1.82	0.602	0.93	0.285	1.995	0.157	6.42e-05	0.706	0.47006	1.346	0.165518	0.322	4.0939e-07	3.794	3.9558e-06	0.819	0.066725
P18084	Integrin beta-5 OS=Homo sapiens OX=9606 GN=ITGB5 PE=1 SV=1	ITGB5	88.053	7.3019	1.1	1	2	1	1.11	1.612	1.06	0.991	0.886	1.009	0.961	1.102	0.419	1.051	0.415		1.037	0.84576	1.103		0.943		1.253		1.463
P18085	ADP-ribosylation factor 4 OS=Homo sapiens OX=9606 GN=ARF4 PE=1 SV=3	ARF4	20.511	23.206	21.7	4	11	3	1.618	1.044	0.664	0.739	0.582	1.414	0.948	1.15	0.327	1.523	0.231	0.00066315	0.782	0.33552	0.7	0.0038017	0.485	7.4443e-07	2.78	0.00031901	0.908	0.38872
P18124	60S ribosomal protein L7 OS=Homo sapiens OX=9606 GN=RPL7 PE=1 SV=1	RPL7	29.225	143.29	31.9	9	20	9	1.433	0.538	0.888	0.649	0.534	2.282	0.754	0.907	0.437	1.48	0.191	6.0735e-11	0.662	0.2943	1.178	0.0055587	0.439	6.1926e-10	2.684	7.207e-10	0.593	1.5296e-06
P18206	Vinculin OS=Homo sapiens OX=9606 GN=VCL PE=1 SV=4	VCL	123.8	323.31	34.5	38	71	38	1.222	1.867	0.561	1.056	0.817	0.673	1.368	1.142	0.559	0.928	0.831	0.0030821	1.068	0.96864	0.41	1e-32	1.138	2.5823e-06	1.496	1e-32	1.635	1e-32
P18428	Lipopolysaccharide-binding protein OS=Homo sapiens OX=9606 GN=LBP PE=1 SV=3	LBP	53.383	8.2841	2.3	1	1	1	0.454	0.537	1.153	0.661	1.334	0.951	0.901	2.279	1.38	1.212	1.451		0.627	0.102382	1.28		0.545		0.34		0.236
P18440	Arylamine N-acetyltransferase 1 OS=Homo sapiens OX=9606 GN=NAT1 PE=1 SV=2	NAT1	33.898	19.066	10	3	4	3	1.243	1.045	0.779	0.895	0.989	1.49	0.935	1.133	0.981	0.828	0.658		0.92	0.57154	0.833		1.081		1.257		0.922
P18621	60S ribosomal protein L17 OS=Homo sapiens OX=9606 GN=RPL17 PE=1 SV=3	RPL17	21.397	38.644	23.4	4	11	4	1.261	0.591	1.149	0.752	0.29	3.07	0.828	0.505	0.336	1.011	0.109	1.5257e-10	0.717	0.8163	1.388	0.0029218	0.744	0.22258	4.348	0.00015667	1.17	0.36406
P18669	Phosphoglycerate mutase 1 OS=Homo sapiens OX=9606 GN=PGAM1 PE=1 SV=2	PGAM1	28.804	51.477	24.4	5	6	5	0.927	1.1	1.192	0.753	1.61	0.562	0.738	1.811	0.836	1.203	1.488	0.037424	0.812	0.60718	1.615	0.00177735	0.626	0.0021555	0.576	7.0002e-07	0.607	0.0024826
P18827	Syndecan-1 OS=Homo sapiens OX=9606 GN=SDC1 PE=1 SV=3	SDC1	32.461	-2	3.9	1	1	1
P18850	Cyclic AMP-dependent transcription factor ATF-6 alpha OS=Homo sapiens OX=9606 GN=ATF6 PE=1 SV=3	ATF6	74.584	-2	1.5	1	1	1	1.386	1.507	0.541	0.752	0.858	1.285	0.618	1.614	0.661	0.994	0.514		0.903	0.62632	0.875		0.757		1.615		0.934
P18858	DNA ligase 1 OS=Homo sapiens OX=9606 GN=LIG1 PE=1 SV=1	LIG1	101.73	12.54	2.1	2	2	2	1.357	1.535	0.902	0.845	0.626	1.164	0.814	1.173	0.434	1.26	0.373	0.033024	1.007	0.8573	1.108	0.7018	0.671	0.31932	2.168	0.0057003	1.309	0.140077
P18859	ATP synthase-coupling factor 6, mitochondrial OS=Homo sapiens OX=9606 GN=ATP5J PE=1 SV=1	ATP5J	12.587	25.788	26.9	3	8	3	0.991	0.849	1.511	0.676	0.588	1.408	1.666	0.824	0.531	0.914	0.377	0.0020595	0.844	0.54178	0.907	0.30686	0.74	0.0020159	1.685	0.0060758	1.03	0.72586
P18887	DNA repair protein XRCC1 OS=Homo sapiens OX=9606 GN=XRCC1 PE=1 SV=2	XRCC1	69.476	22.017	6	3	3	3	1.124	1.261	1.081	0.932	0.745	1.513	1.084	0.732	0.643	0.987	0.425	0.130956	0.996	0.96576	0.997	0.93902	0.944	0.50444	1.509	0.33946	1.723	0.123358
P19105	Myosin regulatory light chain 12A OS=Homo sapiens OX=9606 GN=MYL12A PE=1 SV=2	MYL12A	19.794	76.607	44.4	6	18	1	0.957	1.691	0.626	1.416	0.857	0.875	1.134	1.029	0.914	0.896	1.045		1.17	0.60424	0.552		1.58		1.117		1.643
P19338	Nucleolin OS=Homo sapiens OX=9606 GN=NCL PE=1 SV=3	NCL	76.613	155.48	20.4	15	24	15	0.842	1.047	0.821	0.858	0.443	2.328	1.272	0.729	0.362	1.014	0.155	1.21569e-13	0.679	0.40536	0.645	8.95284e-13	0.846	0.0178244	1.901	1.9158e-08	1.436	1.0708e-07
P19367	Hexokinase-1 OS=Homo sapiens OX=9606 GN=HK1 PE=1 SV=3	HK1	102.48	138.85	18.4	18	26	16	1.097	1.172	0.746	0.922	0.915	1.296	1.19	1.03	0.849	1.035	0.655	6.0858e-08	0.876	0.21262	0.627	1.7958e-06	0.891	0.0156563	1.199	0.00077869	1.138	0.00126161
P19387	DNA-directed RNA polymerase II subunit RPB3 OS=Homo sapiens OX=9606 GN=POLR2C PE=1 SV=2	POLR2C	31.441	5.867	3.6	1	2	1	0.783	0.97	0.929	1.211	1.575	0.729	1.241	1.12	1.342	1.002	1.841	0.041523	0.924	0.68722	0.749	0.078958	1.209	0.149099	0.497	0.098321	0.866	0.33418
P19388	DNA-directed RNA polymerases I, II, and III subunit RPABC1 OS=Homo sapiens OX=9606 GN=POLR2E PE=1 SV=4	POLR2E	24.551	14.473	8.6	2	3	2	1.158	1.147	0.898	0.952	0.855	1.427	1.181	0.852	0.758	0.967	0.531		0.93	0.6281	0.76		0.984		1.354		1.346
P19404	NADH dehydrogenase [ubiquinone] flavoprotein 2, mitochondrial OS=Homo sapiens OX=9606 GN=NDUFV2 PE=1 SV=2	NDUFV2	27.391	58.888	24.5	5	6	5	1.126	1.075	0.715	1.229	0.747	1.391	1.243	0.834	0.711	1.285	0.511	0.0053626	0.883	0.50188	0.575	0.0023587	0.956	0.47562	1.507	0.048625	1.289	0.0192558
P19447	General transcription and DNA repair factor IIH helicase subunit XPB OS=Homo sapiens OX=9606 GN=ERCC3 PE=1 SV=1	ERCC3	89.277	7.6112	1.5	1	1	1	1.016	0.89	0.693	0.79	0.435	2.182	1.729	0.556	0.316	1.021	0.145		0.626	0.36718	0.401		0.774		2.336		1.601
P19474	E3 ubiquitin-protein ligase TRIM21 OS=Homo sapiens OX=9606 GN=TRIM21 PE=1 SV=1	TRIM21	54.169	79.724	18.1	8	8	8	1.179	0.993	0.732	1.163	1.728	0.895	1.093	1.056	0.622	1.069	0.695	0.0131045	0.803	0.21968	0.67	0.0158809	1.088	0.37414	0.682	0.00172096	0.94	0.92206
P19525	Interferon-induced, double-stranded RNA-activated protein kinase OS=Homo sapiens OX=9606 GN=EIF2AK2 PE=1 SV=2	EIF2AK2	62.094	15.143	2.4	1	1	1
P19623	Spermidine synthase OS=Homo sapiens OX=9606 GN=SRM PE=1 SV=1	SRM	33.824	50.023	23.5	6	10	6	1.234	0.831	1.478	0.631	0.333	1.524	0.448	0.982	0.417	1.816	0.274	1.8504e-06	0.9	0.99368	3.299	6.2974e-07	0.347	6.0554e-05	3.706	0.00184177	0.846	0.548
P19784	Casein kinase II subunit alpha' OS=Homo sapiens OX=9606 GN=CSNK2A2 PE=1 SV=1	CSNK2A2	41.213	27.718	13.1	3	3	3
P19793	Retinoic acid receptor RXR-alpha OS=Homo sapiens OX=9606 GN=RXRA PE=1 SV=1	RXRA	50.811	18.56	6.5	3	4	3	1.28	1.64	0.624	1.075	0.902	0.999	1.045	0.947	0.777	1.038	0.778	0.0077798	1.094	0.85756	0.597	0.050505	1.036	0.67416	1.419	0.02468	1.732	0.002577
P19823	Inter-alpha-trypsin inhibitor heavy chain H2 OS=Homo sapiens OX=9606 GN=ITIH2 PE=1 SV=2	ITIH2	106.46	146.6	13.4	11	17	11	1.007	0.863	0.967	0.979	0.952	1.002	1.006	0.892	1.06	1.703	1.058	0.6141	0.878	0.44412	0.961	0.61306	0.575	5.823e-07	1.058	0.057843	0.967	0.2111
P19827	Inter-alpha-trypsin inhibitor heavy chain H1 OS=Homo sapiens OX=9606 GN=ITIH1 PE=1 SV=3	ITIH1	101.39	5.8649	1.1	1	1	1
P19838	Nuclear factor NF-kappa-B p105 subunit OS=Homo sapiens OX=9606 GN=NFKB1 PE=1 SV=2	NFKB1	105.35	58.634	7.5	6	6	6	1.083	1.434	1.22	1.105	0.644	0.853	0.86	0.889	1.058	1.347	1.24	0.54732	1.285	0.070225	1.419	0.12064	0.82	0.64924	1.682	0.144439	1.613	0.15136
P19878	Neutrophil cytosol factor 2 OS=Homo sapiens OX=9606 GN=NCF2 PE=1 SV=2	NCF2	59.761	122.27	26.6	11	19	11	1.108	1.978	0.675	1.128	0.741	0.674	0.802	1.171	0.756	1.066	1.122	0.44334	1.267	0.41788	0.842	0.79974	1.058	0.94348	1.495	0.0026197	1.689	0.0095445
P19971	Thymidine phosphorylase OS=Homo sapiens OX=9606 GN=TYMP PE=1 SV=2	TYMP	49.955	64.366	14.9	6	7	6	0.777	1.224	3.37	1.019	0.617	0.53	0.785	0.605	0.367	0.785	0.692	0.073437	2.034	0.28134	4.293	0.000122367	1.298	0.062399	1.259	0.046483	2.023	0.00091968
P20020	Plasma membrane calcium-transporting ATPase 1 OS=Homo sapiens OX=9606 GN=ATP2B1 PE=1 SV=3	ATP2B1	138.75	41.558	10.8	10	15	5	0.871	0.738	1.207	1.02	1.451	1.037	1.249	0.957	1.291	0.883	1.245	0.092355	0.919	0.53808	0.966	0.99868	1.155	0.073577	0.6	1.6723e-05	0.771	0.083419
P20042	Eukaryotic translation initiation factor 2 subunit 2 OS=Homo sapiens OX=9606 GN=EIF2S2 PE=1 SV=2	EIF2S2	38.388	121.37	29.4	12	18	12	0.924	0.724	1.011	1.112	0.81	1.691	0.869	0.937	1.041	1.004	0.616	2.2446e-07	0.906	0.64726	1.163	0.031982	1.108	0.20376	1.141	0.4265	0.773	0.0044788
P20073	Annexin A7 OS=Homo sapiens OX=9606 GN=ANXA7 PE=1 SV=3	ANXA7	52.739	119.73	25.4	12	22	12	0.937	0.655	1.603	0.717	1.596	0.836	0.68	1.312	1.727	0.984	2.066	1.11022e-16	1.043	0.97596	2.357	1e-32	0.729	1.5499e-06	0.587	1e-32	0.499	2.8785e-10
P20160	Azurocidin OS=Homo sapiens OX=9606 GN=AZU1 PE=1 SV=3	AZU1	26.885	37.77	9.2	2	3	2	1.285	1.194	0.738	0.971	1.198	0.878	0.977	1.135	0.814	1.286	0.927	0.31108	0.914	0.44052	0.755	0.094278	0.755	0.46576	1.073	0.20128	1.052	0.5874
P20292	Arachidonate 5-lipoxygenase-activating protein OS=Homo sapiens OX=9606 GN=ALOX5AP PE=1 SV=2	ALOX5AP	18.157	18.446	17.4	3	3	3	1.244	2.343	0.458	1.177	0.752	0.725	1.013	0.823	0.58	1.133	0.8	0.31694	1.305	0.72678	0.452	0.05056	1.039	0.86338	1.654	0.10208	2.847	0.02012
P20337	Ras-related protein Rab-3B OS=Homo sapiens OX=9606 GN=RAB3B PE=1 SV=2	RAB3B	24.758	-2	7.3	2	2	1	1.337	1.361	0.509	1.109	0.741	1.552	1.054	0.937	0.583	0.85	0.376		0.954	0.70686	0.483		1.305		1.804		1.453
P20339	Ras-related protein Rab-5A OS=Homo sapiens OX=9606 GN=RAB5A PE=1 SV=2	RAB5A	23.658	29.743	32.1	6	11	3	0.766	0.811	0.981	1.292	1.117	1.212	1.222	1.058	1.268	1.015	1.046	0.79582	0.91	0.34522	0.803	0.043603	1.273	0.149538	0.686	0.003943	0.767	0.086701
P20340	Ras-related protein Rab-6A OS=Homo sapiens OX=9606 GN=RAB6A PE=1 SV=3	RAB6A	23.593	72.288	38	7	16	3	1.036	0.922	1.302	0.804	1.288	0.853	0.984	0.93	1.401	1.103	1.642	0.0021963	1.06	0.7207	1.323	0.030198	0.729	0.052905	0.804	0.0061356	0.991	0.58446
P20585	DNA mismatch repair protein Msh3 OS=Homo sapiens OX=9606 GN=MSH3 PE=1 SV=4	MSH3	127.41	7.9907	0.8	1	1	1	0.913	1.256	0.785	1.156	0.666	1.812	1.05	0.749	0.404	1.156	0.223		0.831	0.49422	0.748		1		1.371		1.677
P20591	Interferon-induced GTP-binding protein Mx1 OS=Homo sapiens OX=9606 GN=MX1 PE=1 SV=4	MX1	75.519	173.86	21.3	12	20	11	1.485	0.639	2.336	0.467	1.729	0.894	1.222	0.54	0.439	0.454	0.491	2.5567e-06	1.109	0.99298	1.912	1.4616e-09	1.029	0.2024	0.859	0.49294	1.183	0.65496
P20592	Interferon-induced GTP-binding protein Mx2 OS=Homo sapiens OX=9606 GN=MX2 PE=1 SV=1	MX2	82.088	16.385	5.6	4	5	3	1.446	0.97	1.179	1.006	1.185	0.828	1.753	0.722	0.534	0.652	0.645		0.999	0.94184	0.673		1.543		1.22		1.343
P20618	Proteasome subunit beta type-1 OS=Homo sapiens OX=9606 GN=PSMB1 PE=1 SV=2	PSMB1	26.489	235.21	44.4	9	25	9	0.793	0.98	1.078	1.112	1.354	0.866	1.079	0.986	1.576	1.057	1.82	5.168e-07	1.037	0.87582	0.999	0.54398	1.052	0.20524	0.586	8.0466e-09	0.994	0.96972
P20674	Cytochrome c oxidase subunit 5A, mitochondrial OS=Homo sapiens OX=9606 GN=COX5A PE=1 SV=2	COX5A	16.762	30.356	22	4	7	4	1.093	1.314	0.954	1.153	0.786	1.171	1.226	0.877	0.66	1.17	0.564	0.0170006	0.989	0.89102	0.778	0.0022566	0.985	0.36958	1.391	0.0135153	1.498	1.76339e-05
P20700	Lamin-B1 OS=Homo sapiens OX=9606 GN=LMNB1 PE=1 SV=2	LMNB1	66.408	323.31	41.3	26	56	24	1.111	2.101	0.608	1.318	0.557	0.986	1.16	0.875	0.475	0.839	0.482	1.40798e-12	1.271	0.67456	0.524	1.62448e-12	1.571	1e-32	1.995	1.0737e-11	2.401	1e-32
P20701	Integrin alpha-L OS=Homo sapiens OX=9606 GN=ITGAL PE=1 SV=3	ITGAL	128.77	25.303	3.2	4	6	4	1.37	1.684	0.845	1.136	0.666	0.826	1.08	1.093	0.446	1.008	0.54	0.18134	1.173	0.75022	0.782	0.093042	1.127	0.50038	2.057	0.089216	1.541	0.102357
P20718	Granzyme H OS=Homo sapiens OX=9606 GN=GZMH PE=1 SV=1	GZMH	27.315	20.188	11	3	3	3	1.168	0.702	1.202	1.233	0.577	1.49	0.951	1.137	0.577	1.073	0.387	0.05082	0.934	0.75942	1.264	0.167624	1.149	0.80572	2.024	0.0035606	0.617	0.026105
P20742	Pregnancy zone protein OS=Homo sapiens OX=9606 GN=PZP PE=1 SV=4	PZP	163.86	7.1763	2	3	4	1
P20810	Calpastatin OS=Homo sapiens OX=9606 GN=CAST PE=1 SV=4	CAST	76.572	259.51	28	17	29	17	0.576	0.446	2.016	0.73	1.372	0.524	0.529	0.958	4.04	0.782	7.71	1e-32	1.875	0.48104	3.811	1.11022e-16	0.934	0.37836	0.42	9.1209e-10	0.466	7.2185e-07
P20839	Inosine-5'-monophosphate dehydrogenase 1 OS=Homo sapiens OX=9606 GN=IMPDH1 PE=1 SV=2	IMPDH1	55.405	45.553	10.7	5	6	4	1.001	1.408	0.887	1.105	0.692	1.133	0.904	1.034	0.653	1.163	0.576	0.041697	1.026	0.94462	0.981	0.8986	0.95	0.85204	1.447	0.0157226	1.362	0.027503
P20851	C4b-binding protein beta chain OS=Homo sapiens OX=9606 GN=C4BPB PE=1 SV=1	C4BPB	28.357	7.9885	3.6	1	1	1	0.822	0.724	0.6	0.857	0.926	0.855	2.312	0.704	1.485	1.331	1.737		0.732	0.33462	0.26		0.644		0.888		1.028
P20933	N(4)-(beta-N-acetylglucosaminyl)-L-asparaginase OS=Homo sapiens OX=9606 GN=AGA PE=1 SV=2	AGA	37.208	7.827	3.2	1	1	1
P20936	Ras GTPase-activating protein 1 OS=Homo sapiens OX=9606 GN=RASA1 PE=1 SV=1	RASA1	116.4	7.254	1.3	1	1	1
P20962	Parathymosin OS=Homo sapiens OX=9606 GN=PTMS PE=1 SV=2	PTMS	11.53	12.961	10.8	1	2	1	1.365	1.412	0.565	0.824	0.41	2.025	0.958	0.908	0.503	0.765	0.248	0.0018793	0.922	0.9066	0.59	0.026035	1.077	0.65764	3.329	0.0099388	1.555	0.024023
P21127	Cyclin-dependent kinase 11B OS=Homo sapiens OX=9606 GN=CDK11B PE=1 SV=4	CDK11B	92.619	35.356	6.5	5	6	5	1.098	1.463	0.898	0.931	0.691	1.378	1.133	0.864	0.527	1.084	0.382	0.042645	0.955	0.73714	0.793	0.045441	0.859	0.38802	1.589	0.134122	1.693	0.038804
P21266	Glutathione S-transferase Mu 3 OS=Homo sapiens OX=9606 GN=GSTM3 PE=1 SV=3	GSTM3	26.559	76.261	37.8	8	12	7	0.729	3.519	0.735	1.213	1.032	0.644	0.441	0.467	0.874	0.763	1.357	0.00168075	2.112	0.115336	1.667	0.00038415	1.59	3.9702e-05	0.706	6.3028e-05	7.535	1.9731e-08
P21281	V-type proton ATPase subunit B, brain isoform OS=Homo sapiens OX=9606 GN=ATP6V1B2 PE=1 SV=3	ATP6V1B2	56.5	145.47	28	12	34	12	0.865	1.157	1.061	1.172	1.08	0.894	1.009	1.17	1.364	0.922	1.526	3.71192e-12	1.107	0.31586	1.052	0.063204	1.271	1.7335e-05	0.801	1.134e-07	0.989	0.25332
P21283	V-type proton ATPase subunit C 1 OS=Homo sapiens OX=9606 GN=ATP6V1C1 PE=1 SV=4	ATP6V1C1	43.941	21.88	8.9	4	4	4	1.251	1.725	0.777	0.926	0.961	1.015	0.757	1.34	0.643	0.895	0.633	0.148881	1.071	0.90672	1.026	0.81992	1.035	0.82046	1.302	0.166684	1.287	0.153218
P21291	Cysteine and glycine-rich protein 1 OS=Homo sapiens OX=9606 GN=CSRP1 PE=1 SV=3	CSRP1	20.567	184.59	44	7	12	7	1.026	1.071	1.272	0.952	0.639	1.385	1.162	1	0.629	0.956	0.454	7.4719e-07	0.963	0.85782	1.095	0.061518	0.996	0.2565	1.606	0.00100341	1.071	0.33998
P21333	Filamin-A OS=Homo sapiens OX=9606 GN=FLNA PE=1 SV=4	FLNA	280.74	323.31	41.1	81	175	78	1.115	1.859	0.667	1.171	0.698	0.846	1.302	0.941	0.511	0.928	0.604	1.62459e-12	1.129	0.87062	0.512	1.62448e-12	1.262	1e-32	1.597	1.62459e-12	1.976	1.62437e-12
P21399	Cytoplasmic aconitate hydratase OS=Homo sapiens OX=9606 GN=ACO1 PE=1 SV=3	ACO1	98.398	34.464	7.1	5	6	5	1.228	1.064	1.167	0.877	1.224	1	0.913	1.274	0.956	0.825	0.956	0.56528	1.011	0.87472	1.278	0.115919	1.063	0.28302	1.003	0.99922	0.835	0.29886
P21730	C5a anaphylatoxin chemotactic receptor 1 OS=Homo sapiens OX=9606 GN=C5AR1 PE=1 SV=2	C5AR1	39.335	20.949	6	2	2	2	1.133	1.171	0.504	2.246	0.752	1.372	1.112	0.451	1.255	0.356	0.915		1.56	0.22112	0.453		6.309		1.507		2.596
P21796	Voltage-dependent anion-selective channel protein 1 OS=Homo sapiens OX=9606 GN=VDAC1 PE=1 SV=2	VDAC1	30.772	280.02	29.3	8	18	8	1.106	1.119	1.604	0.638	0.621	1.197	1.462	0.646	0.301	1.25	0.251	9.8069e-10	0.921	0.6393	1.097	0.077625	0.51	5.13956e-12	1.781	2.0475e-06	1.732	1.3937e-06
P21912	Succinate dehydrogenase [ubiquinone] iron-sulfur subunit, mitochondrial OS=Homo sapiens OX=9606 GN=SDHB PE=1 SV=3	SDHB	31.629	69.175	30.7	7	17	7	1.02	0.941	1.086	0.843	0.675	1.42	1.593	0.915	0.473	0.9	0.333	3.6619e-05	0.793	0.33922	0.682	2.3757e-05	0.937	0.83888	1.511	0.00039748	1.028	0.94104
P21953	2-oxoisovalerate dehydrogenase subunit beta, mitochondrial OS=Homo sapiens OX=9606 GN=BCKDHB PE=1 SV=2	BCKDHB	43.122	14.96	5.6	2	2	2	1.165	0.842	1.234	0.863	0.721	1.703	1.079	0.917	0.419	1.044	0.246	0.022616	0.828	0.39746	1.144	0.117979	0.827	0.170482	1.616	0.00039883	0.918	0.78038
P21964	Catechol O-methyltransferase OS=Homo sapiens OX=9606 GN=COMT PE=1 SV=2	COMT	30.037	40.393	17.7	4	6	4	1.013	1.163	0.688	1.196	1.052	1.149	0.894	1.166	1.173	0.915	1.021	0.77902	1.011	0.98194	0.77	0.25328	1.307	0.021456	0.963	0.72458	0.997	0.94242
P21980	Protein-glutamine gamma-glutamyltransferase 2 OS=Homo sapiens OX=9606 GN=TGM2 PE=1 SV=2	TGM2	77.328	323.31	37.8	25	66	25	0.832	0.671	1.191	0.762	1.594	0.979	0.881	1.098	1.787	1.101	1.825	1e-32	0.927	0.56806	1.352	1e-32	0.692	1.62459e-12	0.522	1e-32	0.611	3.33067e-16
P22001	Potassium voltage-gated channel subfamily A member 3 OS=Homo sapiens OX=9606 GN=KCNA3 PE=1 SV=3	KCNA3	63.841	6.6091	1.6	1	1	1
P22033	Methylmalonyl-CoA mutase, mitochondrial OS=Homo sapiens OX=9606 GN=MUT PE=1 SV=4	MUT	83.134	28.996	4.9	4	6	4	1.106	0.659	0.897	0.782	0.793	1.638	1.23	0.812	0.492	1.415	0.3	0.0049996	0.668	0.083455	0.729	0.11988	0.553	0.00046316	1.395	0.063441	0.812	0.31338
P22059	Oxysterol-binding protein 1 OS=Homo sapiens OX=9606 GN=OSBP PE=1 SV=1	OSBP	89.42	98.404	15.7	11	16	11	1.219	1.128	1.048	0.806	0.641	1.306	0.919	1.021	0.531	1.115	0.407	0.0106771	0.946	0.72506	1.14	0.52942	0.723	0.00045563	1.902	0.052524	1.105	0.22824
P22061	Protein-L-isoaspartate(D-aspartate) O-methyltransferase OS=Homo sapiens OX=9606 GN=PCMT1 PE=1 SV=4	PCMT1	24.636	72.747	32.6	7	15	7	0.776	0.878	1.525	0.812	1.895	0.544	0.832	1.162	1.847	1.065	3.395	9.5484e-10	1.062	0.78478	1.833	4.2278e-05	0.762	0.0013782	0.409	1.66545e-12	0.756	2.8353e-06
P22087	rRNA 2'-O-methyltransferase fibrillarin OS=Homo sapiens OX=9606 GN=FBL PE=1 SV=2	FBL	33.784	41.278	15.9	6	7	6	0.707	0.719	0.691	0.784	0.514	2.879	1.583	0.491	0.427	0.705	0.148	0.0026615	0.539	0.34644	0.437	0.0103009	1.112	0.70078	1.375	0.04634	1.464	0.2372
P22102	Trifunctional purine biosynthetic protein adenosine-3 OS=Homo sapiens OX=9606 GN=GART PE=1 SV=1	GART	107.77	87.623	9.2	9	14	9	1.198	0.924	1.034	0.882	1.348	0.976	0.932	0.985	0.851	1.279	0.872	0.42058	0.886	0.2686	1.109	0.23692	0.69	0.0024778	0.889	0.60406	0.938	0.40976
P22234	Multifunctional protein ADE2 OS=Homo sapiens OX=9606 GN=PAICS PE=1 SV=3	PAICS	47.079	151.67	29.6	14	32	14	0.906	1.095	1.154	1.115	1.189	0.742	0.788	1.318	1.31	1.14	1.765	2.9029e-11	1.078	0.49048	1.464	4.2659e-10	0.978	0.2859	0.762	1.726e-06	0.831	0.024623
P22303	Acetylcholinesterase OS=Homo sapiens OX=9606 GN=ACHE PE=1 SV=1	ACHE	67.795	19.158	3.4	2	2	2	1.189	1.134	1.056	0.935	1.764	0.474	0.85	1.105	1.178	1.347	2.485		0.991	0.74766	1.242		0.694		0.674		1.026
P22307	Non-specific lipid-transfer protein OS=Homo sapiens OX=9606 GN=SCP2 PE=1 SV=2	SCP2	58.993	24.999	4.9	4	4	4	1.071	1.584	0.699	1.185	0.673	1.245	1.116	0.877	0.61	1.073	0.49	0.032376	1.033	0.98034	0.626	0.0044443	1.104	0.47056	1.591	0.076464	1.806	0.00023862
P22314	Ubiquitin-like modifier-activating enzyme 1 OS=Homo sapiens OX=9606 GN=UBA1 PE=1 SV=3	UBA1	117.85	323.31	28	25	52	25	0.943	1.022	1.293	0.949	1.334	0.626	0.844	1.237	1.562	1.115	2.495	1e-32	1.119	0.47412	1.532	1.80511e-12	0.851	4.3432e-05	0.707	5.23137e-13	0.826	1.1582e-06
P22352	Glutathione peroxidase 3 OS=Homo sapiens OX=9606 GN=GPX3 PE=1 SV=2	GPX3	25.552	7.6086	5.3	1	1	1	0.942	0.807	1.58	0.724	0.626	1.311	1.099	0.889	1.044	1.339	0.796		0.968	0.8679	1.438		0.541		1.505		0.908
P22392	Nucleoside diphosphate kinase B OS=Homo sapiens OX=9606 GN=NME2 PE=1 SV=1	NME2	17.298	148.12	49.3	8	33	0
P22570	NADPH:adrenodoxin oxidoreductase, mitochondrial OS=Homo sapiens OX=9606 GN=FDXR PE=1 SV=3	FDXR	53.836	34.272	12.6	5	6	5	0.822	0.897	1.138	0.796	1.056	1.749	1.081	0.787	0.708	1.14	0.405	0.00188441	0.75	0.115121	1.053	0.68486	0.698	0.199736	0.778	0.44162	1.14	0.61758
P22626	Heterogeneous nuclear ribonucleoproteins A2/B1 OS=Homo sapiens OX=9606 GN=HNRNPA2B1 PE=1 SV=2	HNRNPA2B1	37.429	200.33	45	12	30	12	1.056	1.254	1.02	0.998	0.703	1.439	1.044	0.69	0.525	0.955	0.365	4.0801e-11	1.005	0.98718	0.977	0.61034	1.045	0.65824	1.502	0.00150358	1.817	1.7612e-08
P22681	E3 ubiquitin-protein ligase CBL OS=Homo sapiens OX=9606 GN=CBL PE=1 SV=2	CBL	99.632	19.208	3.6	3	3	3	1.111	1.256	1.02	1.097	0.948	1.147	0.898	1.003	0.944	0.994	0.823	0.58192	1.088	0.22162	1.136	0.4639	1.104	0.31994	1.172	0.63064	1.252	0.69718
P22694	cAMP-dependent protein kinase catalytic subunit beta OS=Homo sapiens OX=9606 GN=PRKACB PE=1 SV=2	PRKACB	40.622	105.07	14.8	5	9	2	1.009	0.965	1.018	1.016	0.69	1.547	1.049	0.876	0.61	1.374	0.394	0.053921	0.834	0.40172	0.97	0.8763	0.739	0.41548	1.462	0.36054	1.102	0.85592
P22695	Cytochrome b-c1 complex subunit 2, mitochondrial OS=Homo sapiens OX=9606 GN=UQCRC2 PE=1 SV=3	UQCRC2	48.442	323.31	35.1	13	30	13	1.109	1.065	0.478	0.927	0.634	1.494	1.881	0.752	0.483	0.966	0.323	4.6655e-09	0.709	0.27496	0.254	1e-32	0.96	0.59244	1.749	1.8577e-07	1.416	7.041e-07
P22830	Ferrochelatase, mitochondrial OS=Homo sapiens OX=9606 GN=FECH PE=1 SV=2	FECH	47.862	48.658	16.5	6	10	6	1.6	1.365	0.677	0.95	0.644	0.967	0.784	1.125	0.552	1.436	0.571	4.4398e-05	1.038	0.9892	0.864	0.33986	0.662	0.0055599	2.484	9.9537e-08	1.213	0.2036
P22894	Neutrophil collagenase OS=Homo sapiens OX=9606 GN=MMP8 PE=1 SV=1	MMP8	53.411	81.691	14.8	6	10	6	0.776	0.971	0.982	2.013	0.845	0.998	1.256	0.658	1.352	0.488	1.355	0.38206	1.436	0.165337	0.782	0.038802	4.125	0.00038391	0.918	0.91218	1.476	0.00055977
P23109	AMP deaminase 1 OS=Homo sapiens OX=9606 GN=AMPD1 PE=1 SV=2	AMPD1	90.218	-2	4.4	3	5	1	3.356	0.428	0.758	0.388	1.163	1.094	0.51	0.606	0.612	1.509	0.559		1.135	0.71596	1.486		0.257		2.886		0.706
P23193	Transcription elongation factor A protein 1 OS=Homo sapiens OX=9606 GN=TCEA1 PE=1 SV=2	TCEA1	33.969	59.646	19.9	6	9	6	1.094	0.667	1.548	0.86	1.152	1.24	0.875	1.136	1.108	0.771	0.894	0.70672	1.02	0.98436	1.769	0.00062149	1.115	0.45954	0.95	0.2856	0.587	0.0072996
P23246	Splicing factor, proline- and glutamine-rich OS=Homo sapiens OX=9606 GN=SFPQ PE=1 SV=2	SFPQ	76.149	104.71	16.3	11	25	10	0.943	1.024	0.723	0.883	0.6	2.109	1.298	0.725	0.524	0.86	0.248	1.62459e-12	0.733	0.39164	0.557	5.1442e-09	1.027	0.7571	1.572	1.7769e-05	1.412	0.00037517
P23258	Tubulin gamma-1 chain OS=Homo sapiens OX=9606 GN=TUBG1 PE=1 SV=2	TUBG1	51.169	12.368	3.8	2	2	2	0.818	1.142	1.57	1.112	0.962	0.64	0.779	1.076	1.86	1.011	2.906		1.455	0.075625	2.015		1.1		0.85		1.061
P23276	Kell blood group glycoprotein OS=Homo sapiens OX=9606 GN=KEL PE=1 SV=2	KEL	82.823	99.472	9.2	6	9	6	1.047	1.03	0.985	1.112	1.488	0.775	1.016	0.985	1.418	0.944	1.83	0.00068209	1.074	0.50816	0.969	0.38838	1.178	0.124796	0.704	0.0055031	1.046	0.28526
P23284	Peptidyl-prolyl cis-trans isomerase B OS=Homo sapiens OX=9606 GN=PPIB PE=1 SV=2	PPIB	23.742	91.662	30.6	6	17	6	2.452	0.827	0.909	0.565	0.464	1.279	1.114	0.725	0.452	0.975	0.353	4.3511e-07	1.142	0.99672	0.816	0.0023841	0.579	9.1208e-09	5.284	7.91611e-12	1.141	0.179104
P23368	NAD-dependent malic enzyme, mitochondrial OS=Homo sapiens OX=9606 GN=ME2 PE=1 SV=1	ME2	65.443	119.41	15.4	8	10	8	1.587	1.163	0.831	0.85	0.87	0.986	1.427	0.874	0.543	1.039	0.551	0.027282	0.957	0.66558	0.582	1.4157e-06	0.818	0.149159	1.824	1.65005e-05	1.331	2.3067e-05
P23381	Tryptophan--tRNA ligase, cytoplasmic OS=Homo sapiens OX=9606 GN=WARS PE=1 SV=2	WARS	53.165	152.15	28.2	14	32	14	0.76	0.651	1.059	0.827	1.086	2.022	0.667	1.029	1.191	1.04	0.589	1.23124e-12	0.768	0.31794	1.588	2.9964e-11	0.795	4.1989e-05	0.7	4.383e-06	0.633	2.1812e-05
P23396	40S ribosomal protein S3 OS=Homo sapiens OX=9606 GN=RPS3 PE=1 SV=2	RPS3	26.688	105.56	42.4	11	28	11	1.495	0.739	1.013	0.756	0.458	1.891	0.824	0.886	0.373	1.411	0.197	2.14428e-12	0.8	0.55028	1.229	0.0188633	0.536	1.17639e-12	3.264	3.7589e-11	0.834	0.110975
P23434	Glycine cleavage system H protein, mitochondrial OS=Homo sapiens OX=9606 GN=GCSH PE=1 SV=2	GCSH	18.884	10.421	5.8	1	1	1	0.952	0.922	2.171	1.01	0.729	1.191	0.763	0.837	0.326	1.298	0.274		1.117	0.93466	2.845		0.778		1.306		1.102
P23458	Tyrosine-protein kinase JAK1 OS=Homo sapiens OX=9606 GN=JAK1 PE=1 SV=2	JAK1	133.28	12.314	1.6	2	2	2	1.226	1.183	0.993	1.08	0.858	1.136	1.18	0.95	0.487	1.103	0.429		0.951	0.62046	0.842		0.979		1.429		1.245
P23469	Receptor-type tyrosine-protein phosphatase epsilon OS=Homo sapiens OX=9606 GN=PTPRE PE=1 SV=1	PTPRE	80.641	5.9669	1.7	1	1	1	0.928	0.905	0.677	1.55	1.195	0.896	1.282	0.937		0.805			0.992	0.83784	0.528		1.925		0.777		0.966
P23497	Nuclear autoantigen Sp-100 OS=Homo sapiens OX=9606 GN=SP100 PE=1 SV=3	SP100	100.42	12.548	3	3	4	2	1.573	1.296	1.092	0.768	0.86	0.978	1.239	0.917	0.572	0.901	0.585		1.083	0.89826	0.881		0.852		1.829		1.413
P23526	Adenosylhomocysteinase OS=Homo sapiens OX=9606 GN=AHCY PE=1 SV=4	AHCY	47.716	250.4	40.7	19	57	19	0.851	0.985	1.13	0.905	1.659	0.662	0.91	1.163	1.521	1.153	2.298	1e-32	0.972	0.97686	1.242	1.63203e-14	0.785	4.80727e-14	0.513	1e-32	0.847	7.0378e-07
P23528	Cofilin-1 OS=Homo sapiens OX=9606 GN=CFL1 PE=1 SV=3	CFL1	18.502	185.17	50	13	23	13	1.139	1.613	1.197	1.032	1.098	0.615	0.683	1.22	1.075	0.899	1.748	5.6967e-10	1.341	0.075041	1.753	1e-32	1.148	0.00079555	1.037	0.7885	1.322	2.2931e-08
P23588	Eukaryotic translation initiation factor 4B OS=Homo sapiens OX=9606 GN=EIF4B PE=1 SV=2	EIF4B	69.15	121.99	17.3	9	12	9	0.811	0.684	1.338	0.979	1.242	1.372	0.784	0.692	2.122	0.845	1.547	0.0034409	1.202	0.58774	1.707	0.00042026	1.159	0.151879	0.653	0.00071546	0.988	0.50372
P23610	Factor VIII intron 22 protein OS=Homo sapiens OX=9606 GN=F8A1 PE=1 SV=2	F8A1	39.103	7.9397	3.8	1	1	1	0.999	1.635	0.806	1.007	1.217	1.034	0.834	0.867	1.089	1.11	1.053		1.094	0.61476	0.966		0.907		0.821		1.886
P23634	Plasma membrane calcium-transporting ATPase 4 OS=Homo sapiens OX=9606 GN=ATP2B4 PE=1 SV=2	ATP2B4	137.92	211.38	13.5	14	24	9	0.82	0.806	1.218	1.265	1.479	0.749	1.088	0.887	1.724	0.876	2.302	4.0535e-11	1.148	0.51718	1.119	0.095637	1.444	1.81923e-05	0.554	4.3283e-11	0.909	0.3957
P23743	Diacylglycerol kinase alpha OS=Homo sapiens OX=9606 GN=DGKA PE=1 SV=3	DGKA	82.629	81.151	13.3	9	13	9	0.996	1.136	0.863	1.358	1.213	0.846	1.006	0.969	1.201	0.962	1.42	4.2238e-06	1.112	0.33078	0.858	0.161716	1.412	1.60801e-05	0.821	0.000177453	1.172	0.0027249
P23786	Carnitine O-palmitoyltransferase 2, mitochondrial OS=Homo sapiens OX=9606 GN=CPT2 PE=1 SV=2	CPT2	73.776	65.687	13.8	7	8	7	1.106	1.181	1.298	0.551	0.82	1.177	1.026	1.228	0.427	1.506	0.363	0.00029999	0.793	0.25208	1.265	0.0064194	0.366	3.2367e-06	1.349	0.034658	0.962	0.35316
P23919	Thymidylate kinase OS=Homo sapiens OX=9606 GN=DTYMK PE=1 SV=4	DTYMK	23.819	68.498	39.6	8	12	8	1.03	1.076	1.019	1.026	1.24	0.91	0.984	1.053	1.286	1.153	1.413	0.067217	1.018	0.78334	1.036	0.72648	0.89	0.037797	0.831	0.105644	1.022	0.86724
P23921	Ribonucleoside-diphosphate reductase large subunit OS=Homo sapiens OX=9606 GN=RRM1 PE=1 SV=1	RRM1	90.069	49.057	7.6	6	8	6	1.379	1.287	0.473	0.476	1.212	0.495	0.741	1.702	1.015	2.061	2.051		0.745	0.46832	0.638		0.231		1.138		0.756
P24071	Immunoglobulin alpha Fc receptor OS=Homo sapiens OX=9606 GN=FCAR PE=1 SV=1	FCAR	32.265	12.271	4.2	1	2	1	1.374	2.072	0.69	0.877	1.072	0.737	0.697	1.287	0.49	1.045	0.665		1.137	0.92778	0.99		0.839		1.282		1.61
P24158	Myeloblastin OS=Homo sapiens OX=9606 GN=PRTN3 PE=1 SV=3	PRTN3	27.807	114.68	24.6	5	24	5	1.083	2.573	0.644	0.833	0.586	0.407	0.658	1.086	0.625	1.342	1.536	0.068777	1.412	0.42806	0.979	0.95052	0.621	0.000117434	1.848	0.00189549	2.369	3.0959e-07
P24298	Alanine aminotransferase 1 OS=Homo sapiens OX=9606 GN=GPT PE=1 SV=3	GPT	54.636	11.075	2	1	1	1
P24530	Endothelin receptor type B OS=Homo sapiens OX=9606 GN=EDNRB PE=1 SV=1	EDNRB	49.643	6.0382	2.3	1	1	1
P24534	Elongation factor 1-beta OS=Homo sapiens OX=9606 GN=EEF1B2 PE=1 SV=3	EEF1B2	24.763	50.373	32.9	7	10	4	1.028	0.659	2.279	0.657	0.448	1.369	0.665	0.832	0.486	0.94	0.355	0.0011815	1.201	0.79668	3.427	0.00040225	0.699	0.00129953	2.295	0.0052049	0.792	0.186062
P24539	ATP synthase F(0) complex subunit B1, mitochondrial OS=Homo sapiens OX=9606 GN=ATP5F1 PE=1 SV=2	ATP5F1	28.908	94.743	37.5	11	25	11	1.05	0.783	0.968	0.724	0.545	1.529	1.708	0.727	0.336	1.061	0.22	7.77211e-11	0.693	0.27526	0.567	2.8721e-10	0.682	2.6996e-09	1.927	7.0791e-10	1.077	0.0153395
P24557	Thromboxane-A synthase OS=Homo sapiens OX=9606 GN=TBXAS1 PE=1 SV=3	TBXAS1	60.518	79.99	18.4	8	9	8	1.922	1.527	1.243	0.567	0.739	0.429	2.078	0.62	0.386	0.411	0.9	0.61794	1.32	0.48304	0.598	0.00189825	1.38	0.150381	2.601	3.5066e-05	2.463	0.0057414
P24666	Low molecular weight phosphotyrosine protein phosphatase OS=Homo sapiens OX=9606 GN=ACP1 PE=1 SV=3	ACP1	18.042	134.8	38.6	6	15	6	0.74	0.582	1.259	0.841	1.994	0.828	0.956	0.958	2.066	0.893	2.495	1.6487e-06	0.975	0.7995	1.317	0.007639	0.942	0.33248	0.371	1.3557e-08	0.608	0.023742
P24723	Protein kinase C eta type OS=Homo sapiens OX=9606 GN=PRKCH PE=1 SV=4	PRKCH	77.828	-2	1.2	1	3	1	1.426	1.551	0.644	1.076	0.857	1.02	0.924	1.105	0.781	0.919	0.766	0.37596	1.135	0.6879	0.697	0.057258	1.171	0.22272	1.664	0.141579	1.404	0.05238
P24752	Acetyl-CoA acetyltransferase, mitochondrial OS=Homo sapiens OX=9606 GN=ACAT1 PE=1 SV=1	ACAT1	45.199	124.36	27.2	11	19	11	1.043	0.575	1.022	0.711	0.614	1.322	1.939	0.758	0.514	1.103	0.389	1.0812e-07	0.674	0.193664	0.527	4.3663e-06	0.645	0.00058328	1.699	1.92105e-05	0.759	0.4663
P24844	Myosin regulatory light polypeptide 9 OS=Homo sapiens OX=9606 GN=MYL9 PE=1 SV=4	MYL9	19.827	9.0628	44.2	6	17	1	1.07	1.155	0.478	1.11	0.797	0.809	2.772	0.709	0.519	0.585	0.642		0.764	0.65852	0.172		1.897		1.343		1.629
P24864	G1/S-specific cyclin-E1 OS=Homo sapiens OX=9606 GN=CCNE1 PE=1 SV=2	CCNE1	47.077	-2	2	1	1	1
P24928	DNA-directed RNA polymerase II subunit RPB1 OS=Homo sapiens OX=9606 GN=POLR2A PE=1 SV=2	POLR2A	217.17	20.509	1.7	3	3	3
P24941	Cyclin-dependent kinase 2 OS=Homo sapiens OX=9606 GN=CDK2 PE=1 SV=2	CDK2	33.929	113.62	21.5	6	7	5	0.968	0.638	1.228	0.99	1.358	0.912	1.194	0.997	1.66	0.955	1.82	0.000138656	1.013	0.89192	1.028	0.46312	1.037	0.64894	0.713	0.0075382	0.64	0.044976
P25024	C-X-C chemokine receptor type 1 OS=Homo sapiens OX=9606 GN=CXCR1 PE=1 SV=2	CXCR1	39.791	7.743	2.9	1	1	1	1.895	1.679	0.592	1.412	0.592	0.883	0.939	0.955	0.494	0.64	0.559		1.515	0.34842	0.63		2.206		3.201		1.758
P25098	Beta-adrenergic receptor kinase 1 OS=Homo sapiens OX=9606 GN=GRK2 PE=1 SV=2	GRK2	79.573	67.908	13.5	9	11	9	1.122	1.71	0.684	1.11	0.972	0.867	0.966	1.195	0.741	1.139	0.855	0.058338	1.044	0.9769	0.708	0.0077611	0.975	0.52016	1.154	0.077938	1.431	0.00162336
P25205	DNA replication licensing factor MCM3 OS=Homo sapiens OX=9606 GN=MCM3 PE=1 SV=3	MCM3	90.98	86.591	13.5	11	14	11	1.142	1.491	0.878	0.998	0.675	0.979	0.998	1.049	0.476	1.468	0.486	0.0078996	0.964	0.76024	0.88	0.040821	0.68	0.00155893	1.692	0.0037379	1.421	1.99301e-05
P25325	3-mercaptopyruvate sulfurtransferase OS=Homo sapiens OX=9606 GN=MPST PE=1 SV=3	MPST	33.178	29.65	12.1	3	5	3	0.995	0.994	0.993	0.974	2.044	0.851	0.941	0.954	1.267	0.972	1.489	0.011539	0.906	0.80102	1.055	0.32026	1.002	0.627	0.487	0.0020848	1.042	0.94406
P25398	40S ribosomal protein S12 OS=Homo sapiens OX=9606 GN=RPS12 PE=1 SV=3	RPS12	14.515	72.605	53	6	16	6	1.62	1.159	1.015	0.803	0.535	1.195	0.745	0.993	0.474	1.426	0.397	0.00010113	1.036	0.95812	1.362	2.2101e-05	0.563	9.9848e-07	3.028	1.52306e-05	1.167	0.02038
P25685	DnaJ homolog subfamily B member 1 OS=Homo sapiens OX=9606 GN=DNAJB1 PE=1 SV=4	DNAJB1	38.044	107.52	31.8	12	20	11	0.799	0.781	1.516	0.945	1.445	0.894	0.766	0.981	1.991	0.966	2.227	8.7909e-11	1.194	0.56568	1.979	1.9855e-09	0.978	0.3288	0.553	7.6378e-08	0.796	0.0052443
P25686	DnaJ homolog subfamily B member 2 OS=Homo sapiens OX=9606 GN=DNAJB2 PE=1 SV=3	DNAJB2	35.58	111.27	30.2	9	13	9	0.77	0.743	1.711	0.84	1.147	1.02	0.751	0.826	2.472	0.781	2.424	5.9749e-07	1.444	0.35066	2.278	5.4663e-09	1.076	0.71458	0.671	0.0040189	0.9	0.5572
P25705	ATP synthase subunit alpha, mitochondrial OS=Homo sapiens OX=9606 GN=ATP5F1A PE=1 SV=1	ATP5F1A	59.75	250.52	32.2	20	47	20	0.95	0.606	1.205	0.703	0.539	1.799	1.876	0.66	0.323	0.972	0.18	1.62437e-12	0.648	0.27128	0.642	1e-32	0.723	1.754e-09	1.763	2.27596e-14	0.918	0.047463
P25774	Cathepsin S OS=Homo sapiens OX=9606 GN=CTSS PE=1 SV=3	CTSS	37.495	14.432	6	2	3	2	1.255	1.388	1.044	0.984	0.793	1.333	0.767	0.846	0.775	1.072	0.581	0.139236	1.132	0.4096	1.361	0.29542	0.918	0.63732	1.583	0.176383	1.641	0.08914
P25786	Proteasome subunit alpha type-1 OS=Homo sapiens OX=9606 GN=PSMA1 PE=1 SV=1	PSMA1	29.555	154.26	40.7	11	38	11	0.76	0.86	1.151	1.087	1.473	0.888	1.103	0.971	1.73	0.88	1.948	1e-32	1.051	0.87596	1.044	0.072716	1.235	0.000164661	0.516	1e-32	0.886	0.00136443
P25787	Proteasome subunit alpha type-2 OS=Homo sapiens OX=9606 GN=PSMA2 PE=1 SV=2	PSMA2	25.898	33.316	14.1	3	16	3	0.785	0.952	1.211	1.183	0.909	0.888	1.153	1.013	1.643	1.025	1.85	7.3727e-11	1.158	0.39334	1.05	0.27576	1.154	0.005222	0.864	0.0153036	0.94	0.34904
P25788	Proteasome subunit alpha type-3 OS=Homo sapiens OX=9606 GN=PSMA3 PE=1 SV=2	PSMA3	28.433	89.331	32.9	10	35	10	0.783	0.84	1.109	1.104	1.486	0.881	1.172	0.967	1.638	0.863	1.859	2.10942e-15	1.02	0.97226	0.946	0.054821	1.279	4.2555e-07	0.527	1e-32	0.869	0.000124787
P25789	Proteasome subunit alpha type-4 OS=Homo sapiens OX=9606 GN=PSMA4 PE=1 SV=1	PSMA4	29.483	62.743	27.2	7	11	7	0.74	0.807	1.177	1.193	1.395	0.843	1.072	0.963	1.73	0.917	2.052	2.4829e-05	1.088	0.77104	1.098	0.060898	1.301	0.0048153	0.53	4.3218e-07	0.838	0.065324
P25815	Protein S100-P OS=Homo sapiens OX=9606 GN=S100P PE=1 SV=2	S100P	10.4	44.087	24.2	2	4	2	1.214	1.675	0.834	0.986	1.082	0.558	0.772	1.425	0.822	1.174	1.473	0.30334	1.104	0.60898	1.08	0.89434	0.84	0.62368	1.122	0.37996	1.175	0.192016
P26010	Integrin beta-7 OS=Homo sapiens OX=9606 GN=ITGB7 PE=1 SV=1	ITGB7	86.902	38.892	8.5	6	7	6	0.92	0.851	3.01	0.72	0.827	0.962	0.823	0.698	0.598	0.553	0.622		1.579	0.38082	3.657	0.0142765	1.302	0.33724	1.112	0.75304	1.219	0.3379
P26022	Pentraxin-related protein PTX3 OS=Homo sapiens OX=9606 GN=PTX3 PE=1 SV=3	PTX3	41.975	34.867	11.3	4	6	4	1.311	1.876	0.546	1.607	0.888	0.593	0.586	1.081	0.831	0.96	1.401	0.72342	1.502	0.22102	0.932	0.94342	1.674	0.148496	1.476	0.117043	1.735	0.0038394
P26038	Moesin OS=Homo sapiens OX=9606 GN=MSN PE=1 SV=3	MSN	67.819	237.85	36.2	27	60	20	1.203	1.471	0.859	1.236	0.895	0.872	0.938	0.982	0.707	0.989	0.811	0.0121355	1.171	0.40862	0.916	0.151302	1.25	1.2742e-07	1.344	6.3475e-08	1.498	4.38538e-14
P26196	Probable ATP-dependent RNA helicase DDX6 OS=Homo sapiens OX=9606 GN=DDX6 PE=1 SV=2	DDX6	54.416	73.64	12	5	9	5	0.988	1.25	1.022	0.999	0.843	1.143	0.916	1.02	0.719	1.341	0.629	0.080657	0.946	0.64782	1.116	0.0075162	0.745	0.028204	1.172	0.26282	1.225	0.053644
P26368	Splicing factor U2AF 65 kDa subunit OS=Homo sapiens OX=9606 GN=U2AF2 PE=1 SV=4	U2AF2	53.5	49.979	11.2	4	6	4	0.916	0.948	1.222	0.771	0.692	1.609	1.231	0.739	0.606	1.019	0.377	0.000159813	0.844	0.4755	0.993	0.68826	0.757	0.061582	1.324	0.087256	1.283	0.028122
P26373	60S ribosomal protein L13 OS=Homo sapiens OX=9606 GN=RPL13 PE=1 SV=4	RPL13	24.261	51.047	28.4	6	8	6	1.541	0.534	0.884	0.715	0.195	2.492	0.587	0.73	0.214	1.008	0.086	1.1612e-06	0.776	0.8153	1.506	0.118121	0.709	0.039004	7.903	1.7064e-06	0.732	0.55828
P26374	Rab proteins geranylgeranyltransferase component A 2 OS=Homo sapiens OX=9606 GN=CHML PE=1 SV=2	CHML	74.071	14.706	3	2	2	2
P26440	Isovaleryl-CoA dehydrogenase, mitochondrial OS=Homo sapiens OX=9606 GN=IVD PE=1 SV=1	IVD	46.319	69.198	22	9	13	9	1.201	1.023	0.946	0.643	0.715	0.838	2.211	0.731	0.601	1.139	0.717	0.0123606	0.783	0.49272	0.428	1.0863e-07	0.565	0.00041857	1.68	0.00025539	1.399	0.0046759
P26447	Protein S100-A4 OS=Homo sapiens OX=9606 GN=S100A4 PE=1 SV=1	S100A4	11.728	34.698	36.6	5	11	5	0.762	1.018	1.265	0.706	2.819	0.405	0.449	1.38	1.341	1.439	3.311	1.8735e-09	0.784	0.96412	2.817	2.1631e-07	0.491	2.1618e-06	0.27	1.3789e-12	0.738	0.00024059
P26572	Alpha-1,3-mannosyl-glycoprotein 2-beta-N-acetylglucosaminyltransferase OS=Homo sapiens OX=9606 GN=MGAT1 PE=1 SV=2	MGAT1	50.878	14.493	4.3	2	2	2
P26583	High mobility group protein B2 OS=Homo sapiens OX=9606 GN=HMGB2 PE=1 SV=2	HMGB2	24.033	110.02	42.6	10	25	9	1.117	1.995	0.545	1.477	0.638	0.963	1.004	0.781	0.616	1.006	0.64	0.000103192	1.309	0.55092	0.543	8.1001e-07	1.468	0.000101931	1.751	2.0726e-07	2.554	1.7043e-12
P26599	Polypyrimidine tract-binding protein 1 OS=Homo sapiens OX=9606 GN=PTBP1 PE=1 SV=1	PTBP1	57.221	70.434	8.3	4	9	4	1.167	1.008	1.141	0.736	0.586	1.715	0.942	0.951	0.705	0.961	0.411	0.003238	0.923	0.8348	1.211	0.03508	0.766	0.101556	1.991	3.8857e-05	1.06	0.157982
P26639	Threonine--tRNA ligase, cytoplasmic OS=Homo sapiens OX=9606 GN=TARS PE=1 SV=3	TARS	83.434	175.35	23	15	21	15	1.212	1.081	0.778	0.744	0.727	1.939	0.749	1.069	0.562	1.198	0.29	1.11089e-12	0.77	0.33706	1.039	0.89628	0.621	1.8972e-06	1.667	8.2299e-05	1.011	0.39552
P26640	Valine--tRNA ligase OS=Homo sapiens OX=9606 GN=VARS PE=1 SV=4	VARS	140.47	298.85	21.4	23	45	23	1.113	0.736	1.249	0.568	0.525	2.032	0.773	1.026	0.441	1.228	0.217	1.62448e-12	0.735	0.3782	1.616	2.22045e-16	0.463	1.62448e-12	2.12	3.7844e-09	0.717	3.3065e-08
P26641	Elongation factor 1-gamma OS=Homo sapiens OX=9606 GN=EEF1G PE=1 SV=3	EEF1G	50.118	111.38	14.6	9	20	9	1.17	1.029	1.23	0.744	0.467	2.042	0.71	0.941	0.354	1.192	0.173	1.1789e-11	0.846	0.70354	1.732	6.9558e-11	0.624	1.22125e-15	2.505	3.1264e-07	1.094	0.092641
P26885	Peptidyl-prolyl cis-trans isomerase FKBP2 OS=Homo sapiens OX=9606 GN=FKBP2 PE=1 SV=2	FKBP2	15.649	24.07	14.8	3	6	3	1.428	0.998	0.819	0.646	0.591	1.873	0.984	0.846	0.652	1.101	0.348	0.0050951	0.842	0.562	0.832	0.138856	0.587	0.0182964	2.416	0.0007983	1.18	0.067342
P27105	Erythrocyte band 7 integral membrane protein OS=Homo sapiens OX=9606 GN=STOM PE=1 SV=3	STOM	31.73	221.65	38.9	10	39	10	0.838	0.837	0.861	1.67	1.354	0.752	1.325	0.578	2.014	0.755	2.678	1.62448e-12	1.306	0.36214	0.65	2.8305e-09	2.212	1e-32	0.619	3.2186e-11	1.448	0.00026075
P27169	Serum paraoxonase/arylesterase 1 OS=Homo sapiens OX=9606 GN=PON1 PE=1 SV=3	PON1	39.731	27.325	9.3	3	4	3	1.037	0.672	1.29	0.783	0.792	1.029	1.43	0.693	1.317	1.514	1.28	0.022416	0.934	0.79386	0.902	0.088415	0.517	3.6649e-05	1.309	0.043217	0.97	0.35766
P27338	Amine oxidase [flavin-containing] B OS=Homo sapiens OX=9606 GN=MAOB PE=1 SV=3	MAOB	58.762	12.275	3.7	2	2	2
P27348	14-3-3 protein theta OS=Homo sapiens OX=9606 GN=YWHAQ PE=1 SV=1	YWHAQ	27.764	136.11	35.5	11	41	7	1.108	1.164	1.067	1.235	0.847	1.188	0.929	0.974	1.079	0.926	0.908	0.143504	1.162	0.037642	1.149	0.168602	1.334	0.00152048	1.308	0.000196282	1.195	0.0002038
P27361	Mitogen-activated protein kinase 3 OS=Homo sapiens OX=9606 GN=MAPK3 PE=1 SV=4	MAPK3	43.135	25.06	14	5	7	4
P27448	MAP/microtubule affinity-regulating kinase 3 OS=Homo sapiens OX=9606 GN=MARK3 PE=1 SV=5	MARK3	84.428	77.131	14.1	9	14	5	0.873	0.789	1.286	1.037	1.163	1.018	0.99	0.966	1.627	0.825	1.598	0.167958	1.131	0.52714	1.299	0.037618	1.257	0.091621	0.751	0.0053821	0.817	0.58426
P27635	60S ribosomal protein L10 OS=Homo sapiens OX=9606 GN=RPL10 PE=1 SV=4	RPL10	24.604	33.213	18.7	5	7	5	1.241	0.653	1.178	0.733	0.573	2.121	0.92	0.769	0.52	1.201	0.245	0.0195795	0.775	0.47638	1.28	0.43986	0.61	0.086481	2.166	0.11874	0.849	0.67016
P27694	Replication protein A 70 kDa DNA-binding subunit OS=Homo sapiens OX=9606 GN=RPA1 PE=1 SV=2	RPA1	68.137	77.832	16.2	8	10	8	1.238	1.342	0.771	0.965	0.712	1.25	1.206	0.862	0.58	1.074	0.464	0.00028166	0.959	0.73666	0.639	3.7156e-05	0.899	0.114965	1.739	0.00027723	1.557	0.00022401
P27695	DNA-(apurinic or apyrimidinic site) lyase OS=Homo sapiens OX=9606 GN=APEX1 PE=1 SV=2	APEX1	35.554	51.449	22.3	5	6	5	0.923	0.872	0.947	0.748	0.492	2.493	1.09	0.741	0.343	0.916	0.138	0.0017403	0.669	0.37816	0.869	0.68816	0.817	0.36506	1.876	0.00180492	1.177	0.57594
P27707	Deoxycytidine kinase OS=Homo sapiens OX=9606 GN=DCK PE=1 SV=1	DCK	30.518	35.734	14.2	3	3	3	1.292	1.206	0.709	1.291	0.823	0.917	0.891	1.343	0.632	1.257	0.689	0.35316	0.981	0.8098	0.796	0.28598	1.027	0.84526	1.57	0.32928	0.898	0.57908
P27708	CAD protein OS=Homo sapiens OX=9606 GN=CAD PE=1 SV=3	CAD	242.98	138.69	8.5	17	22	17	1.301	1.432	0.845	1.059	0.855	1.008	0.622	1.16	0.611	1.385	0.606	8.2002e-05	1.043	0.87442	1.359	0.00030313	0.765	3.5406e-05	1.522	2.033e-06	1.234	0.00024052
P27797	Calreticulin OS=Homo sapiens OX=9606 GN=CALR PE=1 SV=1	CALR	48.141	210.21	31.2	12	49	12	1.053	1.22	0.79	0.869	0.499	1.884	1.086	0.936	0.378	0.947	0.201	1e-32	0.805	0.51496	0.727	1e-32	0.918	0.0060642	2.11	1.62448e-12	1.303	1.14708e-12
P27816	Microtubule-associated protein 4 OS=Homo sapiens OX=9606 GN=MAP4 PE=1 SV=3	MAP4	121	21.278	3.2	3	4	3			2.247	0.369		1.99	0.269		0.541	0.367	0.272		1.202	0.75682	8.353		1.005
P27824	Calnexin OS=Homo sapiens OX=9606 GN=CANX PE=1 SV=2	CANX	67.567	230.3	21.5	12	27	12	1.381	1.323	0.895	0.936	0.449	1.352	0.985	0.871	0.328	1.16	0.243	9.3536e-10	1.01	0.9112	0.909	0.127041	0.807	0.0036591	3.076	5.8995e-08	1.519	1.1955e-07
P27918	Properdin OS=Homo sapiens OX=9606 GN=CFP PE=1 SV=2	CFP	51.276	19.335	6.2	3	3	3	1.003	1.366	0.494	1.439	0.74	1.471	1.299	0.655	0.818	0.869	0.556	0.039224	1.017	0.99372	0.38	0.064905	1.656	0.0106581	1.355	0.102517	2.085	0.102281
P27986	Phosphatidylinositol 3-kinase regulatory subunit alpha OS=Homo sapiens OX=9606 GN=PIK3R1 PE=1 SV=2	PIK3R1	83.597	76.72	9.3	7	8	6	1.128	1.387	0.728	1.153	0.959	0.968	1.262	1.006	0.848	0.893	0.876	0.196	1.031	0.93274	0.577	0.0109776	1.291	0.0102405	1.176	0.061279	1.379	0.069064
P28062	Proteasome subunit beta type-8 OS=Homo sapiens OX=9606 GN=PSMB8 PE=1 SV=3	PSMB8	30.354	91.338	22.5	6	13	6	0.954	1.338	1.009	1.027	1.215	0.882	1.044	0.903	0.765	1.202	0.867	0.35964	0.971	0.75344	0.966	0.75658	0.854	0.21156	0.785	0.099781	1.482	8.4926e-05
P28065	Proteasome subunit beta type-9 OS=Homo sapiens OX=9606 GN=PSMB9 PE=1 SV=2	PSMB9	23.264	47.832	11.4	2	3	2	1.146	1.309	0.97	1.061	0.777	1.457	1.111	0.855	0.404	0.939	0.277	0.033043	0.952	0.6942	0.873	0.46836	1.13	0.42658	1.475	0.0107591	1.531	0.00169882
P28066	Proteasome subunit alpha type-5 OS=Homo sapiens OX=9606 GN=PSMA5 PE=1 SV=3	PSMA5	26.411	296.92	36.9	7	27	7	0.822	0.939	1.148	1.086	1.386	0.792	1.085	0.963	1.72	0.938	2.172	7.77156e-16	1.107	0.59468	1.058	0.104661	1.158	0.0118186	0.593	3.42171e-12	0.975	0.192423
P28068	HLA class II histocompatibility antigen, DM beta chain OS=Homo sapiens OX=9606 GN=HLA-DMB PE=1 SV=1	HLA-DMB	28.943	7.3652	4.6	1	1	1
P28070	Proteasome subunit beta type-4 OS=Homo sapiens OX=9606 GN=PSMB4 PE=1 SV=4	PSMB4	29.204	115.23	28.8	5	14	5	0.762	0.836	1.247	1.061	1.536	0.877	1.177	0.978	1.877	0.826	2.14	9.5654e-05	1.072	0.83446	1.059	0.7804	1.285	0.57806	0.496	3.0396e-07	0.855	0.059418
P28072	Proteasome subunit beta type-6 OS=Homo sapiens OX=9606 GN=PSMB6 PE=1 SV=4	PSMB6	25.357	47.883	21.3	5	9	5	0.745	0.82	1.226	1.118	1.447	0.674	1.161	1.021	1.964	0.944	2.914	2.6461e-08	1.119	0.70956	1.056	0.34572	1.184	0.026624	0.515	0.000115984	0.803	0.04196
P28074	Proteasome subunit beta type-5 OS=Homo sapiens OX=9606 GN=PSMB5 PE=1 SV=3	PSMB5	28.48	147.36	39.5	10	23	10	0.723	0.807	1.144	1.273	1.368	0.885	1.157	0.949	1.816	0.912	2.052	2.62013e-13	1.093	0.8008	0.989	0.059535	1.396	2.6274e-08	0.529	2.5123e-11	0.85	0.0020248
P28161	Glutathione S-transferase Mu 2 OS=Homo sapiens OX=9606 GN=GSTM2 PE=1 SV=2	GSTM2	25.744	48.784	36.7	7	7	4	1.191	1.185	1.224	0.867	1.461	0.949	0.682	0.864	1.667	1.095	1.757	0.032775	1.214	0.24462	1.795	0.0088382	0.792	0.131718	0.815	0.021303	1.372	0.084523
P28288	ATP-binding cassette sub-family D member 3 OS=Homo sapiens OX=9606 GN=ABCD3 PE=1 SV=1	ABCD3	75.475	6.9244	2.1	1	1	1
P28289	Tropomodulin-1 OS=Homo sapiens OX=9606 GN=TMOD1 PE=1 SV=1	TMOD1	40.569	190.54	38.4	13	41	12	0.621	0.598	1.249	1.426	1.13	0.758	1.311	0.824	2.172	0.799	2.865	1e-32	1.258	0.638	0.953	0.59668	1.785	1e-32	0.55	1.54321e-14	0.726	7.2629e-07
P28331	NADH-ubiquinone oxidoreductase 75 kDa subunit, mitochondrial OS=Homo sapiens OX=9606 GN=NDUFS1 PE=1 SV=3	NDUFS1	79.467	165.5	20.6	12	19	12	1.134	1.114	0.757	1.167	0.72	1.306	1.21	0.813	0.69	1.255	0.528	1.83687e-05	0.917	0.63636	0.626	2.4834e-07	0.93	0.071759	1.575	7.8473e-05	1.37	2.0026e-07
P28482	Mitogen-activated protein kinase 1 OS=Homo sapiens OX=9606 GN=MAPK1 PE=1 SV=3	MAPK1	41.389	153.97	26.4	10	19	9	0.959	1.231	1.034	1.115	1.156	0.845	0.922	1.049	1.409	0.884	1.667	6.2537e-10	1.184	0.098036	1.121	0.50608	1.261	0.000140689	0.83	0.00078402	1.173	0.00045585
P28676	Grancalcin OS=Homo sapiens OX=9606 GN=GCA PE=1 SV=2	GCA	24.01	92.787	25.8	5	8	5	1.109	1.42	0.73	1.338	0.872	0.808	0.873	1.031	0.971	1.074	1.202	0.46822	1.195	0.26628	0.836	0.0098796	1.246	0.0038842	1.272	0.2435	1.377	0.0023431
P28799	Granulins OS=Homo sapiens OX=9606 GN=GRN PE=1 SV=2	GRN	63.544	80.544	13.5	9	15	9	0.998	1.923	0.665	1.419	0.79	0.842	0.985	0.982	0.921	0.725	1.094	0.100262	1.37	0.22288	0.675	3.3719e-06	1.957	5.7477e-09	1.263	0.067877	1.958	3.9776e-05
P28838	Cytosol aminopeptidase OS=Homo sapiens OX=9606 GN=LAP3 PE=1 SV=3	LAP3	56.166	225.83	31.2	14	29	14	0.869	0.772	1.369	0.777	2.558	1.151	1.111	0.815	0.582	0.714	0.506	6.1915e-11	0.688	0.2787	1.232	2.0543e-05	1.088	0.22044	0.34	1.62981e-12	0.947	0.22214
P28907	ADP-ribosyl cyclase/cyclic ADP-ribose hydrolase 1 OS=Homo sapiens OX=9606 GN=CD38 PE=1 SV=2	CD38	34.328	47.287	20	6	9	6	1.018	0.788	0.789	0.614	1.417	0.856	1.336	1.197	0.847	1.583	0.989	0.84768	0.635	0.0099006	0.591	4.18e-05	0.388	0.000178681	0.718	0.00029568	0.658	0.0063352
P29144	Tripeptidyl-peptidase 2 OS=Homo sapiens OX=9606 GN=TPP2 PE=1 SV=4	TPP2	138.35	323.31	26.9	29	71	29	0.724	0.878	1.054	1.222	1.544	0.779	1.123	0.945	1.537	0.966	1.973	1e-32	1.011	0.9818	0.939	0.68198	1.265	2.001e-11	0.469	1.62448e-12	0.929	0.075616
P29218	Inositol monophosphatase 1 OS=Homo sapiens OX=9606 GN=IMPA1 PE=1 SV=1	IMPA1	30.188	62.714	17.7	5	7	5	0.859	1.093	1.157	0.778	1.992	0.651	0.546	1.66	1.042	1.198	1.601	0.099482	0.815	0.74112	2.119	0.012775	0.649	0.020676	0.431	0.0051969	0.658	0.03402
P29350	Tyrosine-protein phosphatase non-receptor type 6 OS=Homo sapiens OX=9606 GN=PTPN6 PE=1 SV=1	PTPN6	67.56	323.31	35.5	19	35	19	1.069	1.765	0.684	0.951	0.653	1.357	0.707	1.267	0.53	1.133	0.391	2.49911e-12	0.977	0.80614	0.967	0.97276	0.839	0.00103778	1.637	3.685e-07	1.393	2.8205e-10
P29353	SHC-transforming protein 1 OS=Homo sapiens OX=9606 GN=SHC1 PE=1 SV=4	SHC1	62.821	34.948	9.8	5	5	5	0.922	1.008	1.226	0.777	1.038	1.116	0.862	1.308	1.094	1.109	0.98	0.71352	0.925	0.45532	1.422	0.162997	0.701	0.33248	0.888	0.51526	0.771	0.27494
P29372	DNA-3-methyladenine glycosylase OS=Homo sapiens OX=9606 GN=MPG PE=1 SV=3	MPG	32.868	9.3891	5	1	1	1	1.06	1.127		0.888	1.051	1.324	0.796	0.882	1.625	0.897	1.227		1.187	0.31494			0.99		1.009		1.278
P29401	Transketolase OS=Homo sapiens OX=9606 GN=TKT PE=1 SV=3	TKT	67.877	268.29	26.3	16	33	16	1.333	1.405	0.847	0.936	1.447	0.837	0.876	1.159	0.838	0.896	1.001	0.91144	1.028	0.8778	0.967	0.52406	1.045	0.3975	0.921	0.197041	1.212	2.4614e-05
P29466	Caspase-1 OS=Homo sapiens OX=9606 GN=CASP1 PE=1 SV=1	CASP1	45.158	36.714	12.6	6	7	6	1.169	1.268	0.946	1.058	0.736	1.022	1.07	0.919	0.955	1.194	0.934	0.37896	1.092	0.37142	0.884	0.187319	0.886	0.57902	1.588	0.101519	1.38	0.00055879
P29590	Protein PML OS=Homo sapiens OX=9606 GN=PML PE=1 SV=3	PML	97.55	62.452	9.9	9	10	9	1.229	1.02	0.729	0.91	0.941	1.074	1.452	0.969	0.702	0.953	0.654	0.0022419	0.852	0.23976	0.502	3.8353e-06	0.955	0.95762	1.306	0.040141	1.053	0.98064
P29692	Elongation factor 1-delta OS=Homo sapiens OX=9606 GN=EEF1D PE=1 SV=5	EEF1D	31.121	289.6	47.3	12	40	9	0.971	0.863	1.333	0.831	0.476	1.808	0.749	0.869	0.603	1.158	0.334	2.6123e-11	0.909	0.91134	1.78	1.77636e-15	0.718	1.68513e-05	2.04	3.9892e-08	0.993	0.41104
P29728	2'-5'-oligoadenylate synthase 2 OS=Homo sapiens OX=9606 GN=OAS2 PE=1 SV=3	OAS2	82.43	56.444	11.3	6	6	6	1.302	0.745	1.283	0.724	1.606	1.049	1.314	0.834	0.576	0.916	0.549	0.037221	0.81	0.27898	0.976	0.9622	0.79	0.101103	0.811	0.041545	0.893	0.9117
P29966	Myristoylated alanine-rich C-kinase substrate OS=Homo sapiens OX=9606 GN=MARCKS PE=1 SV=4	MARCKS	31.554	66.54	14.5	3	4	3	1.307	0.63	0.692	0.745	0.646	1.35	1.161	2.439	0.538	0.756	0.399	0.0085012	0.616	0.170116	0.596	0.0041987	0.985	0.7073	2.023	0.00162198	0.258	0.0047966
P30038	Delta-1-pyrroline-5-carboxylate dehydrogenase, mitochondrial OS=Homo sapiens OX=9606 GN=ALDH4A1 PE=1 SV=3	ALDH4A1	61.719	12.665	3.6	2	2	2	1.354	1.647	0.693	1.048	0.754	0.9	1.22	0.979	0.495	1.086	0.55		1.06	0.93836	0.568		0.965		1.796		1.682
P30040	Endoplasmic reticulum resident protein 29 OS=Homo sapiens OX=9606 GN=ERP29 PE=1 SV=4	ERP29	28.993	53.341	26.8	6	6	6	1.452	1.011	0.914	0.908	0.821	1.049	0.82	1.217	0.692	1.494	0.66	0.0021385	0.921	0.62682	1.115	0.58422	0.608	4.3503e-05	1.769	0.000100056	0.831	0.0055445
P30041	Peroxiredoxin-6 OS=Homo sapiens OX=9606 GN=PRDX6 PE=1 SV=3	PRDX6	25.035	116.28	33.5	8	24	8	0.915	0.765	1.251	0.814	2.262	0.536	0.653	1.232	1.461	1.066	2.726	1.44329e-15	0.906	0.99914	1.916	2.8669e-10	0.764	1.1209e-07	0.405	2.66454e-15	0.621	1.6391e-06
P30043	Flavin reductase (NADPH) OS=Homo sapiens OX=9606 GN=BLVRB PE=1 SV=3	BLVRB	22.119	171.59	40.8	6	24	6	0.841	0.801	1.541	0.969	1.597	0.552	0.786	1.267	1.628	0.866	2.949	8.943e-11	1.14	0.53972	1.961	1.5576e-08	1.119	0.55686	0.527	7.52731e-14	0.632	0.00028027
P30044	Peroxiredoxin-5, mitochondrial OS=Homo sapiens OX=9606 GN=PRDX5 PE=1 SV=4	PRDX5	22.086	52.518	29	5	13	5	1.147	1.271	1.033	1.071	0.78	0.881	1.075	1.047	0.648	1.255	0.736	0.00032473	1.026	0.91996	0.961	0.73772	0.853	0.00021971	1.471	9.6224e-05	1.214	0.00042389
P30046	D-dopachrome decarboxylase OS=Homo sapiens OX=9606 GN=DDT PE=1 SV=3	DDT	12.712	43.919	27.1	3	5	3	0.842	0.77	1.05	0.485	2.206	0.433	0.544	1.661	1.405	1.16	3.245	3.6719e-05	0.758	0.68072	1.93	0.23302	0.418	0.00055862	0.382	8.1678e-05	0.464	0.00069686
P30048	Thioredoxin-dependent peroxide reductase, mitochondrial OS=Homo sapiens OX=9606 GN=PRDX3 PE=1 SV=3	PRDX3	27.692	46.165	22.7	5	23	5	1.155	0.98	1.533	0.734	0.766	0.745	1.332	1.029	0.634	1.429	0.851	0.031461	0.95	0.76232	1.151	0.068902	0.514	3.4716e-11	1.508	3.3018e-08	0.952	0.2614
P30049	ATP synthase subunit delta, mitochondrial OS=Homo sapiens OX=9606 GN=ATP5F1D PE=1 SV=2	ATP5F1D	17.49	7.9893	5.4	1	3	1	0.895	0.536	1.949	0.669	0.558	1.327	1.889	0.821	0.359	0.923	0.271		0.799	0.4039	1.032		0.725		1.604		0.653
P30050	60S ribosomal protein L12 OS=Homo sapiens OX=9606 GN=RPL12 PE=1 SV=1	RPL12	17.818	113.92	49.7	6	11	6	1.124	0.809	0.963	0.876	0.627	1.976	0.983	0.94	0.496	1.17	0.251	6.4142e-05	0.749	0.30942	0.98	0.75292	0.749	0.0010582	1.793	0.0112567	0.861	0.21098
P30084	Enoyl-CoA hydratase, mitochondrial OS=Homo sapiens OX=9606 GN=ECHS1 PE=1 SV=4	ECHS1	31.387	55.987	22.1	5	8	5	0.815	1.269	1.202	0.881	0.746	0.953	1.319	0.814	0.601	1.2	0.631	0.08598	0.948	0.71534	0.911	0.4979	0.734	0.077878	1.092	0.88868	1.559	0.046022
P30085	UMP-CMP kinase OS=Homo sapiens OX=9606 GN=CMPK1 PE=1 SV=3	CMPK1	22.222	61.169	28.6	5	15	5	0.857	0.816	1.378	0.795	1.514	0.832	0.68	1.522	1.275	0.965	1.532	1.5509e-07	0.929	0.80676	2.026	2.5633e-10	0.824	0.0195238	0.566	2.9309e-10	0.536	1.7996e-08
P30086	Phosphatidylethanolamine-binding protein 1 OS=Homo sapiens OX=9606 GN=PEBP1 PE=1 SV=3	PEBP1	21.057	18.516	11.8	2	4	2	1.349	1.046	1.067	0.82	1.332	1.103	0.688	0.888	1.065	1.14	0.966	0.62306	1.038	0.72784	1.551	0.0065798	0.719	0.25292	1.013	0.40612	1.178	0.34886
P30101	Protein disulfide-isomerase A3 OS=Homo sapiens OX=9606 GN=PDIA3 PE=1 SV=4	PDIA3	56.782	243	32.3	16	39	16	2.175	1.339	0.816	0.957	0.527	0.98	0.649	0.873	0.665	1.216	0.679	1.3194e-08	1.402	0.29008	1.257	3.6467e-06	0.787	6.8617e-09	4.127	1e-32	1.534	1e-32
P30153	Serine/threonine-protein phosphatase 2A 65 kDa regulatory subunit A alpha isoform OS=Homo sapiens OX=9606 GN=PPP2R1A PE=1 SV=4	PPP2R1A	65.308	181.21	27	14	38	14	0.925	1.03	1.17	1.053	1.324	0.889	0.92	1.063	1.296	0.994	1.458	3.4039e-09	1.055	0.5492	1.272	3.6669e-05	1.059	0.4362	0.699	2.796e-08	0.969	0.30244
P30154	Serine/threonine-protein phosphatase 2A 65 kDa regulatory subunit A beta isoform OS=Homo sapiens OX=9606 GN=PPP2R1B PE=1 SV=3	PPP2R1B	66.213	52.445	11	6	8	6	1.253	1.276	1.036	0.993	1.062	0.942	0.81	0.896	1.118	1.127	1.187	0.4932	1.173	0.069659	1.279	0.0020753	0.881	0.23578	1.18	0.083221	1.424	0.0022824
P30260	Cell division cycle protein 27 homolog OS=Homo sapiens OX=9606 GN=CDC27 PE=1 SV=2	CDC27	91.866	26.55	4.2	3	3	3	1.233	1.213	0.656	0.818	0.734	1.596	0.893	1.251	0.506	1.152	0.317	0.0145759	0.787	0.26642	0.735	0.024539	0.71	0.0068246	1.68	0.020475	0.97	0.78082
P30273	High affinity immunoglobulin epsilon receptor subunit gamma OS=Homo sapiens OX=9606 GN=FCER1G PE=1 SV=1	FCER1G	9.6674	7.7762	10.5	1	2	1	1.286	1.426	0.756	1.317	0.673	1.304	1.177	0.755	0.706	0.7	0.541	0.20692	1.191	0.42564	0.642	0.148499	1.881	0.065616	1.911	0.033225	1.889	0.0138424
P30405	Peptidyl-prolyl cis-trans isomerase F, mitochondrial OS=Homo sapiens OX=9606 GN=PPIF PE=1 SV=1	PPIF	22.04	19.405	12.1	3	3	3	1.426	1.01	0.94	0.653	0.666	1.313	1.657	0.733	0.404	1.179	0.308		0.799	0.39068	0.567		0.554		2.141		1.378
P30419	Glycylpeptide N-tetradecanoyltransferase 1 OS=Homo sapiens OX=9606 GN=NMT1 PE=1 SV=2	NMT1	56.806	35.138	10.9	4	4	4	1.038	0.948	1.126	0.952	0.8	1.553	1.009	0.826	0.69	1.169	0.444	0.005382	0.887	0.51006	1.116	0.84004	0.814	0.066336	1.297	0.186425	1.148	0.41492
P30453	HLA class I histocompatibility antigen, A-34 alpha chain OS=Homo sapiens OX=9606 GN=HLA-A PE=1 SV=1	HLA-A	41.054	7.5709	21.6	7	13	0
P30466	HLA class I histocompatibility antigen, B-18 alpha chain OS=Homo sapiens OX=9606 GN=HLA-B PE=1 SV=1	HLA-B	40.274	7.5163	22.4	7	12	0
P30479	HLA class I histocompatibility antigen, B-41 alpha chain OS=Homo sapiens OX=9606 GN=HLA-B PE=1 SV=1	HLA-B	40.539	10.541	23.8	7	14	0
P30492	HLA class I histocompatibility antigen, B-54 alpha chain OS=Homo sapiens OX=9606 GN=HLA-B PE=1 SV=1	HLA-B	40.38	6.7808	22.4	7	10	0
P30511	HLA class I histocompatibility antigen, alpha chain F OS=Homo sapiens OX=9606 GN=HLA-F PE=1 SV=3	HLA-F	39.061	12.479	13.3	4	5	2
P30519	Heme oxygenase 2 OS=Homo sapiens OX=9606 GN=HMOX2 PE=1 SV=2	HMOX2	36.032	37.079	14.2	4	4	4	1.395	1.257	0.895	0.828	0.645	1.317	0.996	1.078	0.482	1.183	0.366		0.931	0.63982	0.899		0.7		2.163		1.166
P30520	Adenylosuccinate synthetase isozyme 2 OS=Homo sapiens OX=9606 GN=ADSS PE=1 SV=3	ADSS	50.097	118.62	25.9	9	11	9	1.03	1.68	0.8	1.126	0.937	0.942	0.857	1.097	0.775	1.152	0.823	0.020015	1.085	0.76336	0.933	0.26496	0.977	0.41424	1.099	0.101297	1.531	6.4513e-05
P30566	Adenylosuccinate lyase OS=Homo sapiens OX=9606 GN=ADSL PE=1 SV=2	ADSL	54.889	138.96	26	11	33	11	0.745	0.734	1.27	1.015	1.643	0.765	1.019	1.04	1.86	1.028	2.431	1e-32	1.023	0.96854	1.246	3.3514e-07	0.987	0.32586	0.453	1e-32	0.706	7.51621e-14
P30613	Pyruvate kinase PKLR OS=Homo sapiens OX=9606 GN=PKLR PE=1 SV=2	PKLR	61.829	236.8	30	15	26	14	0.702	1.012	1.17	0.932	1.499	0.615	0.798	1.476	1.841	0.989	2.993	2.46814e-12	1.052	0.81524	1.466	4.41e-05	0.942	0.033423	0.468	2.42369e-11	0.686	6.7727e-07
P30622	CAP-Gly domain-containing linker protein 1 OS=Homo sapiens OX=9606 GN=CLIP1 PE=1 SV=2	CLIP1	162.24	27.166	3.1	4	4	4	1.214	1.456	0.896	1.063	0.585	1.095	1.093	1.083	0.604	1.068	0.552	0.0025017	1.063	0.8205	0.82	0.031922	0.995	0.82656	2.075	0.0091206	1.344	0.0044784
P30626	Sorcin OS=Homo sapiens OX=9606 GN=SRI PE=1 SV=1	SRI	21.676	75.979	36.4	7	33	7	0.822	0.784	1.277	0.9	1.775	0.935	0.802	1.1	1.83	0.882	1.957	1e-32	1.022	0.9649	1.592	3.33067e-16	1.02	0.27596	0.463	1e-32	0.713	1.30007e-13
P30711	Glutathione S-transferase theta-1 OS=Homo sapiens OX=9606 GN=GSTT1 PE=1 SV=4	GSTT1	27.335	21.496	10	3	4	3	2.455	1.451	1.27	0.579	1.535	0.434	0.442	0.489	1.178	1.044	2.714	0.149757	1.758	0.120281	2.873	0.127217	0.555	0.0028206	1.599	0.094596	2.967	0.042696
P30740	Leukocyte elastase inhibitor OS=Homo sapiens OX=9606 GN=SERPINB1 PE=1 SV=1	SERPINB1	42.741	150.16	34	12	20	12	1.111	1.424	1.092	0.83	1.293	0.527	0.798	1.461	1.072	1.057	2.034	3.9968e-10	1.077	0.56556	1.368	4.3734e-07	0.785	0.00198091	0.859	0.04272	0.975	0.73722
P30825	High affinity cationic amino acid transporter 1 OS=Homo sapiens OX=9606 GN=SLC7A1 PE=1 SV=1	SLC7A1	67.638	7.9748	1.6	1	1	1	1.841	1.098	0.389	1.091	0.383	2.344	0.685	0.485	0.34	1.006	0.145		0.971	0.99042	0.568		1.084		4.807		2.264
P30837	Aldehyde dehydrogenase X, mitochondrial OS=Homo sapiens OX=9606 GN=ALDH1B1 PE=1 SV=3	ALDH1B1	57.206	18.953	7	4	7	3	0.687	0.592	1.41	0.84	0.55	1.095	2.226	0.719	0.498	1.355	0.455	0.0145446	0.677	0.2957	0.633	0.0054993	0.62	0.021583	1.249	0.199342	0.823	0.3764
P30876	DNA-directed RNA polymerase II subunit RPB2 OS=Homo sapiens OX=9606 GN=POLR2B PE=1 SV=1	POLR2B	133.9	39.781	5	5	5	5	1.238	1.167	0.941	1.018	0.745	1.251	1.136	1.035	0.626	1.006	0.5	0.00157648	0.965	0.75394	0.828	0.055661	1.012	0.41596	1.662	0.0178609	1.128	0.140276
P31040	Succinate dehydrogenase [ubiquinone] flavoprotein subunit, mitochondrial OS=Homo sapiens OX=9606 GN=SDHA PE=1 SV=2	SDHA	72.691	216.12	23.2	11	21	11	0.914	0.908	1.446	0.736	0.535	1.49	1.614	0.819	0.299	1.106	0.201	1.1778e-09	0.773	0.39424	0.896	0.37116	0.665	8.6947e-11	1.708	1.66888e-05	1.109	0.101862
P31146	Coronin-1A OS=Homo sapiens OX=9606 GN=CORO1A PE=1 SV=4	CORO1A	51.026	323.31	31.7	18	31	18	1.094	1.778	0.578	1.269	0.714	1.026	1.004	0.961	0.584	0.94	0.569	0.032256	1.142	0.85402	0.576	0.0027007	1.35	0.002018	1.532	4.3085e-05	1.85	2.5729e-07
P31150	Rab GDP dissociation inhibitor alpha OS=Homo sapiens OX=9606 GN=GDI1 PE=1 SV=2	GDI1	50.582	149.56	35.1	14	44	8	0.955	1.027	1.269	0.951	1.261	0.781	0.877	1.116	1.453	0.855	1.86	1.4488e-08	1.156	0.267	1.447	9.778e-07	1.112	0.066924	0.757	1.88596e-05	0.92	0.074777
P31153	S-adenosylmethionine synthase isoform type-2 OS=Homo sapiens OX=9606 GN=MAT2A PE=1 SV=1	MAT2A	43.66	88.949	22.5	9	15	9	0.983	1.205	1.186	1.091	1.117	0.903	0.933	0.957	1.246	1.017	1.38	0.0141571	1.159	0.032279	1.271	0.000118462	1.073	0.106037	0.88	0.30016	1.259	0.109538
P31321	cAMP-dependent protein kinase type I-beta regulatory subunit OS=Homo sapiens OX=9606 GN=PRKAR1B PE=1 SV=4	PRKAR1B	43.072	25.361	10.5	5	8	3	0.68	0.983	1.248	0.903	1.222	0.999	1.058	1.196	1.287	1.271	1.288	0.20452	0.888	0.29258	1.18	0.120063	0.71	0.155556	0.556	0.098556	0.822	0.111403
P31323	cAMP-dependent protein kinase type II-beta regulatory subunit OS=Homo sapiens OX=9606 GN=PRKAR2B PE=1 SV=3	PRKAR2B	46.302	10.755	7.2	3	3	2	1.168	1.387	0.979	1.074	0.991	0.907	1.136	0.876	0.887	1.037	0.978		1.111	0.30788	0.862		1.036		1.179		1.583
P31350	Ribonucleoside-diphosphate reductase subunit M2 OS=Homo sapiens OX=9606 GN=RRM2 PE=1 SV=1	RRM2	44.877	17.814	8	2	2	2
P31483	Nucleolysin TIA-1 isoform p40 OS=Homo sapiens OX=9606 GN=TIA1 PE=1 SV=3	TIA1	42.963	11.3	5.4	2	2	2	1.002	0.704	1.516	0.676	0.526	1.98	1.074	1.007	0.494	0.881	0.249		0.803	0.49508	1.412		0.767		1.905		0.699
P31689	DnaJ homolog subfamily A member 1 OS=Homo sapiens OX=9606 GN=DNAJA1 PE=1 SV=2	DNAJA1	44.868	34.83	11.8	5	7	5	1.322	1.342	1.049	1.028	0.733	1.034	0.886	0.948	0.637	1.148	0.616	0.022844	1.132	0.52666	1.184	0.26586	0.895	0.62786	1.804	0.0304	1.416	0.010582
P31751	RAC-beta serine/threonine-protein kinase OS=Homo sapiens OX=9606 GN=AKT2 PE=1 SV=2	AKT2	55.768	25.662	7.9	4	5	4	1.394	1.481	0.823	1.048	0.712	1.175	0.817	1.06	0.506	1.143	0.431	0.025664	1.07	0.9406	1.007	0.96314	0.917	0.4269	1.958	0.127342	1.397	0.031275
P31930	Cytochrome b-c1 complex subunit 1, mitochondrial OS=Homo sapiens OX=9606 GN=UQCRC1 PE=1 SV=3	UQCRC1	52.645	176.57	24.8	10	19	10	1.154	1.164	0.582	0.948	0.625	1.443	1.658	0.783	0.476	0.939	0.33	3.7789e-11	0.794	0.40646	0.351	3.33067e-16	1.01	0.73898	1.846	2.222e-05	1.487	2.4041e-06
P31937	3-hydroxyisobutyrate dehydrogenase, mitochondrial OS=Homo sapiens OX=9606 GN=HIBADH PE=1 SV=2	HIBADH	35.329	28.589	8.6	2	3	2	1.182	0.886	1.121	0.667	0.82	1.321	1.651	0.796	0.672	1.02	0.509	0.0030214	0.807	0.3056	0.679	0.100244	0.654	0.039879	1.441	0.04092	1.113	0.25342
P31939	Bifunctional purine biosynthesis protein PURH OS=Homo sapiens OX=9606 GN=ATIC PE=1 SV=3	ATIC	64.615	284.41	35.8	18	36	18	1.17	0.64	0.888	0.954	1.554	0.895	1.053	1.034	1.704	1.077	1.904	1.47909e-11	0.954	0.6698	0.843	0.083	0.886	0.120156	0.753	6.2073e-08	0.619	3.7724e-08
P31941	DNA dC->dU-editing enzyme APOBEC-3A OS=Homo sapiens OX=9606 GN=APOBEC3A PE=1 SV=3	APOBEC3A	23.012	17.859	9.5	2	2	2	0.873	1.181	0.821	0.632	1.263	0.656	1.347	2.044	0.945	0.797	1.441		0.729	0.28934	0.61		0.793		0.691		0.578
P31942	Heterogeneous nuclear ribonucleoprotein H3 OS=Homo sapiens OX=9606 GN=HNRNPH3 PE=1 SV=2	HNRNPH3	36.926	43.711	17.6	6	10	5	1.065	0.966	1.44	1.004	0.68	1.366	0.968	0.755	0.883	0.851	0.646	0.00094437	1.16	0.29546	1.488	0.1112	1.18	0.026004	1.566	0.0045796	1.279	0.20166
P31943	Heterogeneous nuclear ribonucleoprotein H OS=Homo sapiens OX=9606 GN=HNRNPH1 PE=1 SV=4	HNRNPH1	49.229	92.295	14.9	6	8	3	1.027	0.947	1.573	0.919	0.57	1.496	1.096	0.861	0.711	0.962	0.475	0.0030839	1.039	0.8081	1.435	0.071861	0.955	0.94212	1.802	1.59676e-05	1.1	0.069697
P31944	Caspase-14 OS=Homo sapiens OX=9606 GN=CASP14 PE=1 SV=2	CASP14	27.679	11.602	10.3	2	2	2
P31946	14-3-3 protein beta/alpha OS=Homo sapiens OX=9606 GN=YWHAB PE=1 SV=3	YWHAB	28.082	85.165	32.1	8	59	3	1.016	1.509	0.743	1.051	0.926	1.204	0.872	1.046	1.027	0.974	0.853	0.35344	1.065	0.73902	0.852	0.29632	1.079	0.44776	1.097	0.88456	1.443	5.6791e-05
P31947	14-3-3 protein sigma OS=Homo sapiens OX=9606 GN=SFN PE=1 SV=1	SFN	27.774	5.9001	10.5	3	15	1	0.944	1.435	0.846	1.006	1.144	0.894	1.066	1.12	1.038	1.081	1.161	0.40992	0.993	0.84754	0.794	0.5875	0.931	0.66394	0.825	0.112681	1.281	0.20712
P31948	Stress-induced-phosphoprotein 1 OS=Homo sapiens OX=9606 GN=STIP1 PE=1 SV=1	STIP1	62.639	323.31	47.7	33	93	33	0.768	0.795	1.529	0.898	1.653	0.588	0.816	1.174	1.956	0.97	3.327	1e-32	1.143	0.65432	1.874	1e-32	0.926	0.0188184	0.465	1.62437e-12	0.677	1e-32
P31949	Protein S100-A11 OS=Homo sapiens OX=9606 GN=S100A11 PE=1 SV=2	S100A11	11.74	15.999	17.1	2	4	2	1.144	1.643	1.17	0.828	0.771	0.841	0.811	1.557	0.512	0.959	0.609	0.044537	1.072	0.88718	1.443	0.20218	0.863	0.055865	1.484	0.0092446	1.055	0.69416
P32019	Type II inositol 1,4,5-trisphosphate 5-phosphatase OS=Homo sapiens OX=9606 GN=INPP5B PE=1 SV=4	INPP5B	112.85	27.667	3.3	3	3	3	1.208	1.245	0.769	0.764	0.986	0.882	0.907	1.53	0.914	1.308	1.036		0.873	0.40302	0.848		0.584		1.225		0.814
P32119	Peroxiredoxin-2 OS=Homo sapiens OX=9606 GN=PRDX2 PE=1 SV=5	PRDX2	21.892	323.31	64.1	18	159	17	0.849	0.726	1.41	0.638	2.652	0.281	0.488	1.483	1.949	1.142	6.936	1e-32	0.922	0.81004	2.889	1.62448e-12	0.559	1.62437e-12	0.32	1e-32	0.49	1.62448e-12
P32121	Beta-arrestin-2 OS=Homo sapiens OX=9606 GN=ARRB2 PE=1 SV=2	ARRB2	46.105	81.672	17.4	6	8	6	1.135	1.701	0.816	1.051	0.981	0.773	0.912	1.141	1.071	1.002	1.386	3.6105e-05	1.201	0.26458	0.895	0.064065	1.049	0.33752	1.157	0.049677	1.491	0.0029373
P32320	Cytidine deaminase OS=Homo sapiens OX=9606 GN=CDA PE=1 SV=2	CDA	16.185	90.139	26	2	2	2	1.014	2.179	0.796	1.032	0.905	0.565	0.881	1.24	0.761	1.064	1.347	0.41772	1.242	0.48502	0.904	0.72	0.97	0.83058	1.12	0.63102	1.757	0.143621
P32322	Pyrroline-5-carboxylate reductase 1, mitochondrial OS=Homo sapiens OX=9606 GN=PYCR1 PE=1 SV=2	PYCR1	33.36	19.527	5.6	1	1	1
P32455	Guanylate-binding protein 1 OS=Homo sapiens OX=9606 GN=GBP1 PE=1 SV=2	GBP1	67.93	41.071	9.3	6	8	5	1.009	1.063	1.303	1.044	0.974	0.813	1.43	1.075	0.801	0.89	0.985	0.7798	1.007	0.90596	0.911	0.48026	1.173	0.57326	1.036	0.095044	0.989	0.90878
P32456	Guanylate-binding protein 2 OS=Homo sapiens OX=9606 GN=GBP2 PE=1 SV=3	GBP2	67.208	20.669	6.8	4	7	3	0.894	1.378	0.856	1.082	0.593	1.461	0.971	1.014	0.651	1.223	0.446	0.023064	0.924	0.73816	0.882	0.33556	0.885	0.21482	1.508	0.182464	1.359	0.0178761
P32780	General transcription factor IIH subunit 1 OS=Homo sapiens OX=9606 GN=GTF2H1 PE=1 SV=1	GTF2H1	62.031	5.9534	2.2	1	1	1	1.027	1.016	1.086	0.955	1.253	1.034	1.023	0.856	1.289	1.181	1.247		1.005	0.92556	1.062		0.809		0.82		1.187
P32929	Cystathionine gamma-lyase OS=Homo sapiens OX=9606 GN=CTH PE=1 SV=3	CTH	44.508	26.765	10.9	4	4	4	0.951	0.862	0.911	0.76	0.857	1.201	0.786	1.522	1.063	1.409	0.885	0.195762	0.787	0.178278	1.159	0.57562	0.539	0.0184429	1.11	0.75916	0.566	0.0169187
P32969	60S ribosomal protein L9 OS=Homo sapiens OX=9606 GN=RPL9 PE=1 SV=1	RPL9	21.863	16.204	10.9	2	3	2	1.17	0.84	1.069	0.919	0.881	1.647	0.821	0.801	0.737	0.976	0.447	0.059937	0.924	0.73966	1.302	0.02362	0.942	0.24432	1.328	0.3677	1.049	0.97564
P33121	Long-chain-fatty-acid--CoA ligase 1 OS=Homo sapiens OX=9606 GN=ACSL1 PE=1 SV=1	ACSL1	77.942	55.452	11.2	7	10	7	0.929	2.039	0.664	1.418	0.691	0.844	1.071	1.041	0.551	1.002	0.653	0.00045854	1.205	0.75474	0.62	0.000137737	1.415	0.0029996	1.344	0.079559	1.959	1.2427e-08
P33176	Kinesin-1 heavy chain OS=Homo sapiens OX=9606 GN=KIF5B PE=1 SV=1	KIF5B	109.68	323.31	36	32	43	32	0.999	1.446	0.89	1.094	1.033	0.929	0.993	1.099	0.892	1.015	0.96	0.2572	1.05	0.74122	0.896	0.000195648	1.078	0.166535	0.967	0.59096	1.316	1.0802e-09
P33241	Lymphocyte-specific protein 1 OS=Homo sapiens OX=9606 GN=LSP1 PE=1 SV=1	LSP1	37.191	91.559	26.8	8	14	8	1.188	1.043	0.708	1.235	0.597	1.174	1.187	0.926	0.678	0.915	0.578	0.00041517	1.011	0.9643	0.596	2.0655e-06	1.35	0.036362	1.99	0.00139956	1.126	0.28824
P33316	Deoxyuridine 5'-triphosphate nucleotidohydrolase, mitochondrial OS=Homo sapiens OX=9606 GN=DUT PE=1 SV=4	DUT	26.563	31.195	16.7	4	5	4	1.354	1.304	0.969	0.85	0.532	0.676	1.415	1.29	0.461	1.32	0.682	0.0144554	0.944	0.8591	0.685	0.144882	0.644	0.058824	2.545	9.6132e-05	1.011	0.54942
P33527	Multidrug resistance-associated protein 1 OS=Homo sapiens OX=9606 GN=ABCC1 PE=1 SV=3	ABCC1	171.59	42.021	3.5	5	6	5	0.984	1.17	1.041	1.078	1.294	0.806	1.088	0.97	1.22	1.167	1.514	0.0134192	1.032	0.66196	0.957	0.34978	0.924	0.188957	0.76	0.00032248	1.206	0.63136
P33908	Mannosyl-oligosaccharide 1,2-alpha-mannosidase IA OS=Homo sapiens OX=9606 GN=MAN1A1 PE=1 SV=3	MAN1A1	72.968	13.805	4.3	2	2	2
P33991	DNA replication licensing factor MCM4 OS=Homo sapiens OX=9606 GN=MCM4 PE=1 SV=5	MCM4	96.557	52.404	8.3	7	7	7
P33992	DNA replication licensing factor MCM5 OS=Homo sapiens OX=9606 GN=MCM5 PE=1 SV=5	MCM5	82.285	86.93	18.3	11	14	11	1.083	1.327	0.796	0.921	0.755	1.08	1.083	1.062	0.68	1.344	0.63	0.001158	0.903	0.46968	0.735	0.00077811	0.685	0.00059512	1.434	0.0077761	1.25	1.73594e-05
P33993	DNA replication licensing factor MCM7 OS=Homo sapiens OX=9606 GN=MCM7 PE=1 SV=4	MCM7	81.307	36.848	7.2	5	5	5	1.221	1.595	0.634	0.76	0.726	1.081	0.924	1.222	0.572	1.53	0.529	0.2587	0.872	0.45076	0.686	0.161982	0.497	0.023038	1.682	0.0140976	1.305	0.30408
P34896	Serine hydroxymethyltransferase, cytosolic OS=Homo sapiens OX=9606 GN=SHMT1 PE=1 SV=1	SHMT1	53.082	6.3965	2.5	1	1	1
P34897	Serine hydroxymethyltransferase, mitochondrial OS=Homo sapiens OX=9606 GN=SHMT2 PE=1 SV=3	SHMT2	55.992	84.835	18.7	9	14	9	0.67	0.757	0.908	0.978	0.647	2.173	0.705	0.737	0.487	2.242	0.224	2.6655e-07	0.584	0.23004	1.288	0.0035439	0.436	2.6181e-09	1.036	0.21086	1.027	0.64106
P34910	Protein EVI2B OS=Homo sapiens OX=9606 GN=EVI2B PE=1 SV=2	EVI2B	48.666	7.448	2.5	1	1	1
P34932	Heat shock 70 kDa protein 4 OS=Homo sapiens OX=9606 GN=HSPA4 PE=1 SV=4	HSPA4	94.33	323.31	39.9	33	94	31	0.843	0.9	1.114	1.169	1.361	0.773	1.036	1.13	1.59	0.841	2.057	1e-32	1.092	0.59692	1.075	0.00020045	1.39	1e-32	0.619	1e-32	0.796	6.81677e-14
P34949	Mannose-6-phosphate isomerase OS=Homo sapiens OX=9606 GN=MPI PE=1 SV=2	MPI	46.655	23.493	8.5	3	4	3	1.262	0.927	1.109	0.848	1.011	1.493	1.027	0.857	0.66	0.867	0.442	0.0146435	0.915	0.55622	1.08	0.76306	0.978	0.53444	1.248	0.26342	1.082	0.22022
P35080	Profilin-2 OS=Homo sapiens OX=9606 GN=PFN2 PE=1 SV=3	PFN2	15.046	6.1259	10	1	1	1
P35226	Polycomb complex protein BMI-1 OS=Homo sapiens OX=9606 GN=BMI1 PE=1 SV=2	BMI1	36.949	11.854	5.8	2	2	2
P35232	Prohibitin OS=Homo sapiens OX=9606 GN=PHB PE=1 SV=1	PHB	29.804	83.156	28.3	8	12	8	0.671	0.801	1.511	0.868	0.674	1.68	1.294	0.679	0.615	1.224	0.366	0.00022299	0.805	0.41786	1.168	0.26684	0.709	7.7949e-05	0.996	0.43878	1.18	0.171763
P35236	Tyrosine-protein phosphatase non-receptor type 7 OS=Homo sapiens OX=9606 GN=PTPN7 PE=1 SV=3	PTPN7	40.529	33.61	11.1	5	7	5	0.74	0.829	0.863	1.084	1.137	1.245	0.954	1.198	1.815	0.964	1.458		0.97	0.64536	0.905		1.124		0.651		0.692
P35237	Serpin B6 OS=Homo sapiens OX=9606 GN=SERPINB6 PE=1 SV=3	SERPINB6	42.621	14.211	6.4	2	3	2	1.056	0.684	2.453	0.765	0.644	1.404	0.542	0.808	0.657	0.907	0.468	0.0185988	1.304	0.55374	4.526	0.0046446	0.843	0.5466	1.64		0.847	0.67228
P35241	Radixin OS=Homo sapiens OX=9606 GN=RDX PE=1 SV=1	RDX	68.563	129.56	32.6	23	44	15	1.121	0.979	1.18	1.07	1.569	0.753	0.919	1.023	1.393	0.899	1.85	1.3645e-06	1.112	0.3616	1.284	1.0932e-06	1.19	0.0150388	0.714	4.2431e-05	0.957	0.56096
P35244	Replication protein A 14 kDa subunit OS=Homo sapiens OX=9606 GN=RPA3 PE=1 SV=1	RPA3	13.569	43.727	21.5	2	4	2	1.197	1.522	0.968	1.027	0.599	1.016	1.163	0.944	0.801	0.902	0.788	0.34498	1.193	0.2898	0.832	0.7654	1.139	0.138622	1.998	0.084462	1.612	0.00090095
P35249	Replication factor C subunit 4 OS=Homo sapiens OX=9606 GN=RFC4 PE=1 SV=2	RFC4	39.681	26.46	14	4	4	4	1.097	1.023	0.995	0.884	0.72	1.599	1.05	0.81	0.464	1.364	0.29	0.141956	0.805	0.354	0.948	0.48476	0.648	0.0104386	1.524	0.105705	1.263	0.111459
P35250	Replication factor C subunit 2 OS=Homo sapiens OX=9606 GN=RFC2 PE=1 SV=3	RFC2	39.157	17.296	7.6	2	2	2	1.018	0.948	0.943	0.964	0.771	1.604	1.06	0.944	0.785	1.158	0.489		0.841	0.28824	0.89		0.832		1.32		1.004
P35268	60S ribosomal protein L22 OS=Homo sapiens OX=9606 GN=RPL22 PE=1 SV=2	RPL22	14.787	38.064	18.8	2	4	2	1.322	0.621	1.086	0.928	0.423	2.315	0.853	0.765	0.337	1.192	0.146	0.000139947	0.774	0.6014	1.273	0.002882	0.779	0.040717	3.125	0.158564	0.812	0.57856
P35270	Sepiapterin reductase OS=Homo sapiens OX=9606 GN=SPR PE=1 SV=1	SPR	28.048	9.2345	4.2	1	1	1
P35475	Alpha-L-iduronidase OS=Homo sapiens OX=9606 GN=IDUA PE=1 SV=2	IDUA	72.669	74.543	14.5	8	11	8	0.592	0.506	0.52	0.452	0.64	3.992	0.805	0.628	0.529	0.841	0.133	3.3294e-07	0.376	0.125902	0.646	0.07936	0.537	0.00029665	0.925	0.70304	0.806	0.0157245
P35542	Serum amyloid A-4 protein OS=Homo sapiens OX=9606 GN=SAA4 PE=1 SV=2	SAA4	14.746	7.2804	8.5	1	1	1
P35573	Glycogen debranching enzyme OS=Homo sapiens OX=9606 GN=AGL PE=1 SV=3	AGL	174.76	118.04	9.8	15	22	15	1.086	1.473	0.794	1.014	0.855	0.96	0.96	1.263	0.771	1.025	0.803	0.68924	1.015	0.969	0.827	0.26218	0.989	0.79962	1.27	0.30398	1.166	0.34008
P35579	Myosin-9 OS=Homo sapiens OX=9606 GN=MYH9 PE=1 SV=4	MYH9	226.53	323.31	34.9	75	181	61	1.159	1.92	0.578	1.271	0.917	0.68	1.027	1.106	0.692	0.938	1.018	0.86608	1.204	0.65842	0.563	1e-32	1.355	1.11022e-16	1.264	1.59761e-13	1.736	1e-32
P35580	Myosin-10 OS=Homo sapiens OX=9606 GN=MYH10 PE=1 SV=3	MYH10	229	170.96	16.1	34	57	21	0.768	0.869	0.578	1.026	0.788	1.534	1.224	1.524	1.056	0.83	0.688	3.0151e-07	0.728	0.136324	0.472	6.7556e-12	1.236	0.0074049	0.975	0.40942	0.57	7.051e-10
P35606	Coatomer subunit beta' OS=Homo sapiens OX=9606 GN=COPB2 PE=1 SV=2	COPB2	102.49	165.25	20.5	16	24	16	1.331	0.955	0.958	0.875	0.668	1.655	0.976	0.844	0.492	1.113	0.297	5.80314e-13	0.877	0.56796	0.982	0.43248	0.786	0.0078952	1.993	1.3824e-08	1.132	0.47402
P35611	Alpha-adducin OS=Homo sapiens OX=9606 GN=ADD1 PE=1 SV=2	ADD1	80.954	286.86	22.3	15	55	14	0.715	0.719	1.252	1.205	1.409	0.771	1.096	1.001	1.765	0.896	2.289	1e-32	1.093	0.8118	1.142	3.9859e-05	1.345	3.686e-07	0.507	2.52465e-13	0.718	1.59893e-05
P35612	Beta-adducin OS=Homo sapiens OX=9606 GN=ADD2 PE=1 SV=3	ADD2	80.853	323.31	31.4	22	61	21	0.712	0.647	1.34	1.146	1.382	0.799	1.06	0.955	2.033	0.865	2.544	1e-32	1.161	0.73992	1.264	1.2227e-07	1.325	4.6871e-07	0.515	1.11022e-16	0.677	0.000120855
P35613	Basigin OS=Homo sapiens OX=9606 GN=BSG PE=1 SV=2	BSG	42.2	101.15	21.8	7	9	7	0.86	0.993	1.403	0.622	1.467	0.582	0.529	1.725	1.017	1.456	1.747	0.0116788	0.85	0.7846	2.652	2.0918e-05	0.427	2.9845e-06	0.586	5.5594e-05	0.576	2.3921e-05
P35637	RNA-binding protein FUS OS=Homo sapiens OX=9606 GN=FUS PE=1 SV=1	FUS	53.425	62.793	11.2	4	7	2	0.929	0.791	1.162	1.097	0.348	2.523	0.897	0.54	0.409	0.843	0.162	1.1211e-06	0.852	0.973	1.295	0.0058395	1.301	0.00161617	2.67	0.0026784	1.465	0.07276
P35659	Protein DEK OS=Homo sapiens OX=9606 GN=DEK PE=1 SV=1	DEK	42.674	58.381	14.7	6	8	6	1.164	2.237	0.736	1.281	0.766	0.59	0.934	1.131	0.653	0.949	1.107	0.71452	1.389	0.3343	0.788	0.037622	1.35	0.00063884	1.52	0.0020365	1.978	0.00022179
P35754	Glutaredoxin-1 OS=Homo sapiens OX=9606 GN=GLRX PE=1 SV=2	GLRX	11.776	7.9128	10.4	1	2	1	1.054	1.137	1.234	0.826	1.803	0.74	1.036	1.051	1.055	0.898	1.426	0.100978	0.96	0.98836	1.191	0.51736	0.92	0.062284	0.585	0.076696	1.082	0.24334
P35813	Protein phosphatase 1A OS=Homo sapiens OX=9606 GN=PPM1A PE=1 SV=1	PPM1A	42.447	120.04	37.4	14	21	13	0.825	0.9	1.175	1.057	1.273	0.915	0.882	1.125	1.757	0.944	1.92	3.9171e-10	1.112	0.6107	1.332	0.0026383	1.12	0.21552	0.648	3.0169e-07	0.8	0.0051037
P35914	Hydroxymethylglutaryl-CoA lyase, mitochondrial OS=Homo sapiens OX=9606 GN=HMGCL PE=1 SV=2	HMGCL	34.36	52.611	18.8	5	5	5	1.036	1.17	0.87	0.807	0.746	1.526	1.496	0.867	0.586	0.908	0.384	0.04466	0.806	0.32746	0.582	0.06842	0.889	0.24302	1.389	0.032323	1.349	0.10726
P35998	26S proteasome regulatory subunit 7 OS=Homo sapiens OX=9606 GN=PSMC2 PE=1 SV=3	PSMC2	48.633	271.83	50.6	22	44	22	0.832	0.836	1.145	1.14	1.212	1.005	1.156	0.958	1.435	0.942	1.428	2.3547e-08	1.022	0.96674	0.99	0.99048	1.21	7.4061e-08	0.686	4.0404e-09	0.873	0.0169849
P36404	ADP-ribosylation factor-like protein 2 OS=Homo sapiens OX=9606 GN=ARL2 PE=1 SV=4	ARL2	20.878	15.614	10.3	2	2	2	1.128	1.473	0.652	0.851	0.915	1.19	1.15	0.919	0.68	1.32	0.571	0.1083	0.871	0.33118	0.567	0.038841	0.645	0.0118616	1.233	0.3036	1.603	0.0035636
P36406	E3 ubiquitin-protein ligase TRIM23 OS=Homo sapiens OX=9606 GN=TRIM23 PE=1 SV=1	TRIM23	64.066	8.9599	1.7	1	4	1	1.239	1.279	1.092	0.72	1.72	0.622	1.338	0.903	1.159	0.718	1.863		1.035	0.69414	0.816		1.003		0.72		1.416
P36507	Dual specificity mitogen-activated protein kinase kinase 2 OS=Homo sapiens OX=9606 GN=MAP2K2 PE=1 SV=1	MAP2K2	44.424	109.99	28	9	18	6	1.165	1.127	0.865	1.061	0.95	1.104	0.853	1.102	1.041	1.007	0.943	0.89446	1.048	0.52818	1.014	0.77534	1.054	0.28834	1.226	0.045623	1.023	0.7255
P36542	ATP synthase subunit gamma, mitochondrial OS=Homo sapiens OX=9606 GN=ATP5F1C PE=1 SV=1	ATP5F1C	32.996	68.915	22.8	7	28	7	0.988	0.557	1.152	0.703	0.526	1.898	1.948	0.638	0.326	0.924	0.172	1.63958e-12	0.628	0.27368	0.591	1e-32	0.761	1.56706e-05	1.878	1.6052e-10	0.873	0.157243
P36543	V-type proton ATPase subunit E 1 OS=Homo sapiens OX=9606 GN=ATP6V1E1 PE=1 SV=1	ATP6V1E1	26.145	45.872	19.9	4	20	4	1.003	1.227	1.021	1.032	1.092	0.876	0.868	1.085	1.118	0.936	1.276	0.024496	1.112	0.12224	1.176	0.0153832	1.103	0.19856	0.918	0.113981	1.131	0.083735
P36551	Oxygen-dependent coproporphyrinogen-III oxidase, mitochondrial OS=Homo sapiens OX=9606 GN=CPOX PE=1 SV=3	CPOX	50.151	110.94	20	9	14	9	1.632	2.033	0.57	0.874	0.695	0.585	0.673	1.218	0.385	1.3	0.658	0.124318	1.229	0.83302	0.847	0.45084	0.672	0.00046348	2.348	9.6594e-08	1.669	2.1542e-05
P36578	60S ribosomal protein L4 OS=Homo sapiens OX=9606 GN=RPL4 PE=1 SV=5	RPL4	47.697	100.13	25.5	11	22	11	1.402	0.683	0.936	0.716	0.504	2.072	0.763	0.85	0.58	1.312	0.28	1.2737e-09	0.785	0.5611	1.227	0.0059585	0.546	1.5518e-06	2.782	5.0407e-07	0.804	0.24288
P36776	Lon protease homolog, mitochondrial OS=Homo sapiens OX=9606 GN=LONP1 PE=1 SV=2	LONP1	106.49	178.28	18.5	15	25	15	0.828	0.634	0.869	0.673	0.516	2.532	0.936	0.725	0.42	1.594	0.166	1.105e-12	0.543	0.16228	0.928	0.058643	0.422	5.60663e-14	1.605	1.51567e-05	0.874	0.0072415
P36871	Phosphoglucomutase-1 OS=Homo sapiens OX=9606 GN=PGM1 PE=1 SV=3	PGM1	61.448	64.603	15.8	8	9	8	1.285	0.913	0.701	0.822	0.887	1.445	1.099	1.078	0.786	0.868	0.544	0.0009197	0.838	0.22562	0.638	9.8879e-07	0.947	0.93582	1.449	0.0151446	0.847	0.07316
P36873	Serine/threonine-protein phosphatase PP1-gamma catalytic subunit OS=Homo sapiens OX=9606 GN=PPP1CC PE=1 SV=1	PPP1CC	36.983	81.214	24.5	7	8	2	1.068	0.959	1.027	1.238	0.936	1.471	0.942	1.027	0.819	0.784	0.557		0.991	0.97378	1.09		1.579		1.141		0.934
P36915	Guanine nucleotide-binding protein-like 1 OS=Homo sapiens OX=9606 GN=GNL1 PE=1 SV=2	GNL1	68.66	40.957	6.6	4	4	4	0.853	0.865	1.069	1.012	1.205	1.09	0.987	1.118	1.649	0.988	1.513	0.0067445	1.011	0.89972	1.083	0.153977	1.024	0.179259	0.708	0.037382	0.774	0.12426
P36954	DNA-directed RNA polymerase II subunit RPB9 OS=Homo sapiens OX=9606 GN=POLR2I PE=1 SV=1	POLR2I	14.523	15.306	20	2	2	2	1.091	1.122	0.949	1.182	0.76	1.506	1.129	0.794	0.782	0.844	0.519		1.018	0.78074	0.841		1.4		1.436		1.413
P36955	Pigment epithelium-derived factor OS=Homo sapiens OX=9606 GN=SERPINF1 PE=1 SV=4	SERPINF1	46.312	11.005	5	2	2	2
P36957	Dihydrolipoyllysine-residue succinyltransferase component of 2-oxoglutarate dehydrogenase complex, mitochondrial OS=Homo sapiens OX=9606 GN=DLST PE=1 SV=4	DLST	48.755	58.852	12.8	5	9	5	1.338	0.889	1.523	0.919	0.615	1.441	1.207	0.807	0.579	0.854	0.402	5.3108e-07	1.066	0.81982	1.262	0.3323	1.076	0.90118	2.176	0.000176775	1.102	0.6211
P36959	GMP reductase 1 OS=Homo sapiens OX=9606 GN=GMPR PE=1 SV=1	GMPR	37.418	246.43	40.3	10	45	9	0.703	0.923	1.422	1.06	1.889	0.449	0.715	1.288	1.861	0.848	4.145	1e-32	1.15	0.51796	1.989	1e-32	1.25	0.00052365	0.372	1e-32	0.717	1.668e-05
P36969	Phospholipid hydroperoxide glutathione peroxidase OS=Homo sapiens OX=9606 GN=GPX4 PE=1 SV=3	GPX4	22.174	63.407	44.2	9	13	9	1.089	0.977	1.229	0.895	0.939	0.751	1.032	1.126	1.413	1.15	1.881	4.9897e-06	1.121	0.34518	1.191	0.130741	0.778	0.00052232	1.16	0.163484	0.868	0.123779
P37108	Signal recognition particle 14 kDa protein OS=Homo sapiens OX=9606 GN=SRP14 PE=1 SV=2	SRP14	14.57	14.025	15.4	2	3	2	1.053	0.959	0.957	0.951	0.524	1.977	1.066	0.799	0.526	1.081	0.266	0.045463	0.816	0.60266	0.898	0.179258	0.88	0.31756	2.01	0.133375	1.2	0.28184
P37235	Hippocalcin-like protein 1 OS=Homo sapiens OX=9606 GN=HPCAL1 PE=1 SV=3	HPCAL1	22.313	35.918	30.1	5	5	5	0.809	1.091	1.353	0.942	1.188	0.873	1.093	0.983	1.388	0.832	1.59	0.02564	1.124	0.42254	1.238	0.502	1.132	0.80628	0.681	0.075005	1.11	0.44934
P37802	Transgelin-2 OS=Homo sapiens OX=9606 GN=TAGLN2 PE=1 SV=3	TAGLN2	22.391	53.76	32.7	6	8	6	1.283	1.316	0.922	0.872	0.908	1.183	1.036	0.91	0.635	0.881	0.537	0.0084409	1.022	0.96354	0.89	0.031538	0.99	0.41092	1.413	0.081584	1.446	0.061103
P37837	Transaldolase OS=Homo sapiens OX=9606 GN=TALDO1 PE=1 SV=2	TALDO1	37.54	137.82	37.4	13	23	13	1.169	1.295	0.775	0.766	1.979	0.573	0.675	1.513	0.985	1.17	1.719	1.6175e-09	0.844	0.75	1.148	0.0065366	0.655	1.2612e-10	0.591	4.59077e-13	0.856	0.0044557
P37840	Alpha-synuclein OS=Homo sapiens OX=9606 GN=SNCA PE=1 SV=1	SNCA	14.46	155.76	57.1	8	19	8	0.549	0.332	2.216	0.659	0.698	0.714	0.597	0.558	4.947	0.552	6.929	1e-32	2.79	0.34578	3.712	4.8433e-10	1.194	0.45188	0.787	0.047497	0.595	0.0072604
P38117	Electron transfer flavoprotein subunit beta OS=Homo sapiens OX=9606 GN=ETFB PE=1 SV=3	ETFB	27.843	37.617	22	5	7	5	1.318	0.769	0.881	0.975	0.699	2.048	0.62	0.862	0.68	1.154	0.332	0.00181702	0.859	0.74908	1.421	0.0077377	0.845	0.055303	1.886	0.0035241	0.892	0.21468
P38159	RNA-binding motif protein, X chromosome OS=Homo sapiens OX=9606 GN=RBMX PE=1 SV=3	RBMX	42.331	62.346	14.3	5	8	5	0.959	0.953	0.999	0.851	0.5	2.118	1.162	0.693	0.46	0.892	0.217	7.2523e-08	0.787	0.61	0.86	0.150641	0.954	0.78896	1.918	0.00114445	1.375	0.40696
P38606	V-type proton ATPase catalytic subunit A OS=Homo sapiens OX=9606 GN=ATP6V1A PE=1 SV=2	ATP6V1A	68.303	261	30.3	17	34	17	0.91	1.193	0.968	1.141	1.202	0.935	0.964	1.103	1.262	0.928	1.35	2.1221e-07	1.067	0.46464	1.004	0.80334	1.23	4.0479e-06	0.757	3.6607e-07	1.082	0.42516
P38646	Stress-70 protein, mitochondrial OS=Homo sapiens OX=9606 GN=HSPA9 PE=1 SV=2	HSPA9	73.68	323.31	39	22	44	22	0.962	0.747	1.608	0.671	0.604	1.265	1.386	0.911	0.343	1.323	0.271	3.66374e-15	0.789	0.32076	1.16	0.00027515	0.507	1.62459e-12	1.593	8.115e-09	0.82	0.0109187
P38919	Eukaryotic initiation factor 4A-III OS=Homo sapiens OX=9606 GN=EIF4A3 PE=1 SV=4	EIF4A3	46.871	42.577	20.4	9	11	6	1.094	1.044	0.963	0.935	0.86	1.419	1.125	0.938	0.86	1.004	0.606	0.00157965	0.916	0.4532	0.856	0.24326	0.931	0.3943	1.272	0.020198	1.113	0.092241
P39019	40S ribosomal protein S19 OS=Homo sapiens OX=9606 GN=RPS19 PE=1 SV=2	RPS19	16.06	87.741	49.7	8	20	8	1.372	0.744	1.014	1.031	0.342	2.167	0.766	0.681	0.406	1.187	0.187	1.66533e-14	0.888	0.97598	1.324	0.090938	0.869	0.0032807	4.012	9.1865e-08	1.093	0.26048
P39023	60S ribosomal protein L3 OS=Homo sapiens OX=9606 GN=RPL3 PE=1 SV=2	RPL3	46.108	82.195	16.1	7	10	7	1.301	0.617	0.959	0.854	0.461	2.491	0.785	0.622	0.447	1.124	0.179	2.2083e-05	0.762	0.669	1.222	0.00150419	0.76	0.110038	2.822	0.00117757	0.992	0.78108
P39656	Dolichyl-diphosphooligosaccharide--protein glycosyltransferase 48 kDa subunit OS=Homo sapiens OX=9606 GN=DDOST PE=1 SV=4	DDOST	50.8	46.932	12.9	6	10	6	1.457	0.85	0.967	0.736	0.47	1.912	1.088	0.901	0.434	1.084	0.227	4.3107e-05	0.815	0.55774	0.889	0.161423	0.679	6.1295e-05	3.1	0.00033976	0.943	0.58006
P39687	Acidic leucine-rich nuclear phosphoprotein 32 family member A OS=Homo sapiens OX=9606 GN=ANP32A PE=1 SV=1	ANP32A	28.585	41.481	18.5	5	8	5	1.102	1.504	0.866	1.115	0.723	0.81	1.055	1.213	0.743	0.943	0.917	0.66778	1.124	0.51196	0.821	0.046802	1.182	0.068178	1.524	0.00123511	1.24	0.036162
P39748	Flap endonuclease 1 OS=Homo sapiens OX=9606 GN=FEN1 PE=1 SV=1	FEN1	42.592	42.985	12.1	4	4	4	1.129	1.114	1.12	0.941	0.57	1.655	0.917	0.827	0.564	1.199	0.341	0.0105183	0.942	0.90496	1.221	0.27592	0.785	0.23456	1.981	0.089438	1.347	0.0188622
P40121	Macrophage-capping protein OS=Homo sapiens OX=9606 GN=CAPG PE=1 SV=2	CAPG	38.498	48.523	16.4	5	9	5	1.194	1.59	0.771	1.164	1.027	0.667	0.797	1.299	0.864	1.029	1.295	0.63104	1.159	0.43912	0.967	0.99104	1.131	0.0566	1.163	0.047804	1.224	0.11444
P40123	Adenylyl cyclase-associated protein 2 OS=Homo sapiens OX=9606 GN=CAP2 PE=1 SV=1	CAP2	52.823	11.761	6.1	3	3	2	0.987	1.462	0.76	1.44	0.853	1.195	0.966	0.839	0.385	0.862	0.322		1.068	0.90736	0.787	0.5604	1.671	0.105036	1.157	0.6682	1.743	0.63758
P40222	Alpha-taxilin OS=Homo sapiens OX=9606 GN=TXLNA PE=1 SV=3	TXLNA	61.89	30.527	7.9	4	4	4	0.974	0.984	1.068	0.828	0.857	1.431	1.073	0.99	0.824	1.268	0.576	0.0079378	0.833	0.136076	0.995	0.9478	0.653	0.0093816	1.137	0.51558	0.994	0.97814
P40227	T-complex protein 1 subunit zeta OS=Homo sapiens OX=9606 GN=CCT6A PE=1 SV=3	CCT6A	58.024	171.38	27.5	15	38	15	0.749	0.92	0.99	1.048	1.416	1.116	1.101	1.165	1.094	0.98	0.98	0.7331	0.831	0.071083	0.899	0.0053378	1.069	0.069623	0.529	1e-32	0.79	0.00089889
P40306	Proteasome subunit beta type-10 OS=Homo sapiens OX=9606 GN=PSMB10 PE=1 SV=1	PSMB10	28.936	113.77	17.6	5	11	5	1.025	1.427	1.11	1.052	0.62	1.338	1.134	1.009	0.553	0.731	0.413	9.7886e-05	1.069	0.7776	0.979	0.78004	1.439	0.0053426	1.653	0.0060242	1.414	0.00040058
P40429	60S ribosomal protein L13a OS=Homo sapiens OX=9606 GN=RPL13A PE=1 SV=2	RPL13A	23.577	53.339	29.6	7	10	7	1.499	0.526	0.937	0.562	0.441	2.184	0.697	0.906	0.291	1.491	0.133	6.2611e-07	0.667	0.3374	1.344	0.0038209	0.377	1.4763e-06	3.399	0.00053575	0.581	2.1241e-05
P40616	ADP-ribosylation factor-like protein 1 OS=Homo sapiens OX=9606 GN=ARL1 PE=1 SV=1	ARL1	20.417	20.739	13.8	2	2	2	1.358	0.972	1.319	0.794	0.779	1.396	0.975	0.926	0.465	1.132	0.333	0.067478	0.942	0.6315	1.353	0.20438	0.701	0.11036	1.743	0.111924	1.05	0.54782
P40763	Signal transducer and activator of transcription 3 OS=Homo sapiens OX=9606 GN=STAT3 PE=1 SV=2	STAT3	88.067	45.074	7.9	6	6	6	1.079	1.501	0.781	1.155	0.812	1.083	0.906	1.133	0.671	1.053	0.62	7.7054e-05	1.04	0.96952	0.862	0.027277	1.097	0.13068	1.329	0.038402	1.325	0.0154376
P40855	Peroxisomal biogenesis factor 19 OS=Homo sapiens OX=9606 GN=PEX19 PE=1 SV=1	PEX19	32.806	39.869	16.4	4	4	4	1.296	0.945	0.826	0.452	0.694	2.291	0.735	0.774	0.507	1.061	0.221	0.138	0.725	0.36568	1.124	0.68992	0.426	0.036305	1.867		1.221	0.60168
P40925	Malate dehydrogenase, cytoplasmic OS=Homo sapiens OX=9606 GN=MDH1 PE=1 SV=4	MDH1	36.426	73.201	23.7	7	11	7	0.927	0.853	0.882	0.794	1.349	1.561	0.852	0.812	1.32	1.015	0.846	0.60484	0.855	0.3915	1.035	0.40306	0.782	4.9237e-06	0.687	0.0049755	1.05	0.98134
P40926	Malate dehydrogenase, mitochondrial OS=Homo sapiens OX=9606 GN=MDH2 PE=1 SV=3	MDH2	35.503	166.98	44.7	13	20	13	0.979	0.687	1.17	0.694	0.74	1.443	1.804	0.684	0.405	1.135	0.281	1.4929e-06	0.678	0.181182	0.649	4.1221e-05	0.611	7.4856e-10	1.323	0.0110024	1.004	0.24502
P40937	Replication factor C subunit 5 OS=Homo sapiens OX=9606 GN=RFC5 PE=1 SV=1	RFC5	38.496	13.774	6.2	2	2	2	1.274	1.174	0.678	0.95	0.942	1.176	1.332	1.086	0.715	0.911	0.608		0.88	0.33112	0.509		1.043		1.352		1.081
P40938	Replication factor C subunit 3 OS=Homo sapiens OX=9606 GN=RFC3 PE=1 SV=2	RFC3	40.556	6.3783	2.5	1	1	1
P40939	Trifunctional enzyme subunit alpha, mitochondrial OS=Homo sapiens OX=9606 GN=HADHA PE=1 SV=2	HADHA	82.999	203.62	25.4	17	40	17	0.916	0.859	1.284	0.878	0.636	1.569	1.495	0.732	0.553	1.062	0.352	1.66211e-12	0.817	0.4691	0.859	0.023383	0.827	1.1871e-06	1.44	5.5585e-05	1.173	0.00146108
P41091	Eukaryotic translation initiation factor 2 subunit 3 OS=Homo sapiens OX=9606 GN=EIF2S3 PE=1 SV=3	EIF2S3	51.109	145.75	29.9	12	21	12	0.877	0.821	1.073	1.07	1.077	1.558	0.897	1.037	1.026	1.043	0.659	1.3252e-07	0.867	0.25904	1.196	0.00089927	1.026	0.148917	0.814	0.0032847	0.792	0.000157262
P41214	Eukaryotic translation initiation factor 2D OS=Homo sapiens OX=9606 GN=EIF2D PE=1 SV=3	EIF2D	64.706	37.57	8.4	4	4	4	1.159	0.853	1.484	0.875	1.164	1.216	0.778	1.081	1.069	1.002	0.879	0.116381	1.038	0.83248	1.907	0.0023614	0.873	0.169579	0.996	0.90218	0.789	0.042581
P41218	Myeloid cell nuclear differentiation antigen OS=Homo sapiens OX=9606 GN=MNDA PE=1 SV=1	MNDA	45.836	192.29	26.3	10	17	10	1.219	1.244	0.77	1.209	1.021	0.959	0.957	0.969	1.005	1.019	1.048	0.42192	1.106	0.40752	0.805	0.020219	1.186	0.0131351	1.194	0.2295	1.284	0.0026596
P41223	Protein BUD31 homolog OS=Homo sapiens OX=9606 GN=BUD31 PE=1 SV=2	BUD31	17	6.8133	6.9	1	1	1
P41226	Ubiquitin-like modifier-activating enzyme 7 OS=Homo sapiens OX=9606 GN=UBA7 PE=1 SV=2	UBA7	111.69	37.513	5.8	5	6	5	1.331	1.472	0.891	1.002	1.359	0.877	0.788	1.067	0.57	1.046	0.65	0.090218	1.025	0.95962	1.131	0.70444	0.958	0.25492	0.979	0.81624	1.38	0.049703
P41227	N-alpha-acetyltransferase 10 OS=Homo sapiens OX=9606 GN=NAA10 PE=1 SV=1	NAA10	26.458	58.804	23.8	6	12	6	1.151	1.001	0.958	0.912	0.642	1.307	0.876	0.983	0.757	1.319	0.579	0.0049447	0.932	0.7743	1.094	0.32144	0.691	0.0068576	1.793	0.0075189	1.018	0.51154
P41240	Tyrosine-protein kinase CSK OS=Homo sapiens OX=9606 GN=CSK PE=1 SV=1	CSK	50.704	37.274	10.4	4	4	4	1.136	1.02	0.964	0.901	0.726	1.401	1.23	0.985	0.7	0.923	0.5	0.0196019	0.897	0.51412	0.784	0.066418	0.976	0.74774	1.565	0.021041	1.036	0.61096
P41250	Glycine--tRNA ligase OS=Homo sapiens OX=9606 GN=GARS PE=1 SV=3	GARS	83.165	109.21	13.9	10	18	10	1.159	1.005	0.744	1.019	0.607	1.814	0.801	1.035	0.392	1.378	0.216	3.338e-07	0.766	0.37484	0.929	0.51338	0.739	3.1546e-06	1.909	0.00021521	0.971	0.05492
P41252	Isoleucine--tRNA ligase, cytoplasmic OS=Homo sapiens OX=9606 GN=IARS PE=1 SV=2	IARS	144.5	63.671	6.7	8	9	8	1.136	0.896	0.827	0.801	0.614	1.777	0.915	0.928	0.524	1.426	0.295	0.00107657	0.739	0.2736	0.904	0.81678	0.562	2.6699e-06	1.85	0.00032275	0.966	0.54068
P42025	Beta-centractin OS=Homo sapiens OX=9606 GN=ACTR1B PE=1 SV=1	ACTR1B	42.293	24.449	13.8	5	7	2	1.006	1.014	1.137	0.852	1.51	0.927	1.316	0.954	1.049	1.053	1.132	0.137505	0.878	0.30582	0.864	0.26692	0.809	0.77862	0.666	0.052996	1.063	0.24084
P42126	Enoyl-CoA delta isomerase 1, mitochondrial OS=Homo sapiens OX=9606 GN=ECI1 PE=1 SV=1	ECI1	32.816	31.16	13.2	4	4	4	1.204	0.685	0.69	0.664	0.855	1.051	2.277	0.945	0.612	1.167	0.582	0.03368	0.612	0.06328	0.303	0.02096	0.569	0.0030368	1.408	0.116536	0.725	0.151099
P42167	Lamina-associated polypeptide 2, isoforms beta/gamma OS=Homo sapiens OX=9606 GN=TMPO PE=1 SV=2	TMPO	50.67	16.508	6.4	3	4	3	1.061	1.13	1.104	1.14	0.479	1.361	1.531	0.581	0.472	1.115	0.347		0.968	0.94834	0.721		1.022		2.215		1.945
P42224	Signal transducer and activator of transcription 1-alpha/beta OS=Homo sapiens OX=9606 GN=STAT1 PE=1 SV=2	STAT1	87.334	142.98	20.9	13	24	13	0.985	0.93	2.105	0.809	1.309	0.967	1.061	0.783	0.574	0.902	0.594	3.1784e-09	1.076	0.96126	1.984	2.7128e-09	0.897	0.2169	0.752	1.71265e-05	1.188	0.030401
P42226	Signal transducer and activator of transcription 6 OS=Homo sapiens OX=9606 GN=STAT6 PE=1 SV=1	STAT6	94.134	6.1877	1.2	1	1	1	1.412	1.177	1.023	0.992	0.751	1.144	0.815	1.179	0.715	1.063	0.625		1.074	0.6729	1.255		0.933		1.88		0.998
P42229	Signal transducer and activator of transcription 5A OS=Homo sapiens OX=9606 GN=STAT5A PE=1 SV=1	STAT5A	90.646	6.1636	17.5	14	20	1
P42285	Exosome RNA helicase MTR4 OS=Homo sapiens OX=9606 GN=MTREX PE=1 SV=3	MTREX	117.8	38.811	5.8	6	7	6	1.079	1.295	0.845	0.995	0.776	1.491	1.035	0.796	0.719	1.049	0.482	0.00073648	0.958	0.83364	0.816	0.0035999	0.949	0.34186	1.39	0.0187624	1.627	0.00037965
P42331	Rho GTPase-activating protein 25 OS=Homo sapiens OX=9606 GN=ARHGAP25 PE=1 SV=2	ARHGAP25	73.434	32.334	6.5	4	5	4	1.569	0.989	0.71	1.435	0.735	0.862	1.026	1.108	0.818	1.144	0.949		1.133	0.62148	0.692		1.254		2.135		0.893
P42345	Serine/threonine-protein kinase mTOR OS=Homo sapiens OX=9606 GN=MTOR PE=1 SV=1	MTOR	288.89	50.426	2.6	6	7	6	1.072	1.258	0.938	0.859	0.933	0.999	0.987	1.121	0.814	1.474	0.815	0.4019	0.896	0.36782	0.95	0.72874	0.583	0.35048	1.149	0.4427	1.122	0.53002
P42566	Epidermal growth factor receptor substrate 15 OS=Homo sapiens OX=9606 GN=EPS15 PE=1 SV=2	EPS15	98.655	111.48	15.5	14	18	14	0.897	0.76	1.42	0.918	1.02	1.232	1.057	0.857	1.452	0.865	1.179	0.6988	1.083	0.72348	1.343	0.51936	1.061	0.038544	0.879	0.034957	0.887	0.38242
P42574	Caspase-3 OS=Homo sapiens OX=9606 GN=CASP3 PE=1 SV=2	CASP3	31.608	13.801	6.9	2	2	2	1.078	1.095	0.95	0.889	1.028	1.289	0.826	1.339	0.789	1.087	0.612	0.04396	0.862	0.22046	1.15	0.24242	0.818	0.093236	1.049	0.68586	0.818	0.127083
P42677	40S ribosomal protein S27 OS=Homo sapiens OX=9606 GN=RPS27 PE=1 SV=3	RPS27	9.461	21.325	38.1	3	4	1
P42704	Leucine-rich PPR motif-containing protein, mitochondrial OS=Homo sapiens OX=9606 GN=LRPPRC PE=1 SV=3	LRPPRC	157.9	182.86	15.6	22	27	22	1.098	0.899	1.031	0.857	0.569	1.635	1.138	0.851	0.419	1.615	0.256	4.62519e-13	0.741	0.32728	0.906	0.22616	0.531	1.4163e-10	1.93	9.3484e-08	1.056	0.23336
P42765	3-ketoacyl-CoA thiolase, mitochondrial OS=Homo sapiens OX=9606 GN=ACAA2 PE=1 SV=2	ACAA2	41.924	166.84	31.2	11	20	11	1.043	0.69	1.439	0.795	0.694	1.52	1.511	0.62	0.531	1.185	0.349	6.1834e-07	0.813	0.46504	0.952	0.21748	0.671	4.3058e-08	1.503	0.000197333	1.113	0.55622
P42766	60S ribosomal protein L35 OS=Homo sapiens OX=9606 GN=RPL35 PE=1 SV=2	RPL35	14.551	16.468	15.4	2	3	2	1.086	0.693	1.26	0.667	0.474	2.432	1.036	0.589	0.399	1.075	0.164		0.732	0.54744	1.216		0.62		2.291		1.177
P42768	Wiskott-Aldrich syndrome protein OS=Homo sapiens OX=9606 GN=WAS PE=1 SV=4	WAS	52.912	50.541	15.7	5	6	5	1.012	0.978	1.011	1.243	0.618	1.638	0.995	0.765	0.76	1.016	0.464	0.0053162	0.994	0.84052	1.016	0.56634	1.223	0.076198	1.638	0.21316	1.278	0.0123955
P42773	Cyclin-dependent kinase 4 inhibitor C OS=Homo sapiens OX=9606 GN=CDKN2C PE=1 SV=1	CDKN2C	18.127	11.981	11.9	2	2	2	0.999	1.37	1.024	1.18	0.926	0.654	0.789	1.146	1.551	1.192	2.372	0.037515	1.301	0.088199	1.298	0.167239	0.99	0.94116	1.079	0.63136	1.195	0.4583
P42785	Lysosomal Pro-X carboxypeptidase OS=Homo sapiens OX=9606 GN=PRCP PE=1 SV=1	PRCP	55.799	15.602	4.2	2	2	2	1.111	0.767	0.733	0.788	1.629	1.13	1.059	1.099	1.514	1.054	1.34		0.823	0.20824	0.692		0.748		0.682		0.698
P42858	Huntingtin OS=Homo sapiens OX=9606 GN=HTT PE=1 SV=2	HTT	347.6	16.34	0.9	3	3	3
P43007	Neutral amino acid transporter A OS=Homo sapiens OX=9606 GN=SLC1A4 PE=1 SV=1	SLC1A4	55.722	35.746	9	3	3	3	1.626	0.773	0.651	1.072	0.692	0.903	0.973	0.735	0.772	1.914	0.855	0.08396	0.938	0.85266	0.669	0.044756	0.56	2.4401e-05	2.35	0.0022232	1.052	0.59364
P43034	Platelet-activating factor acetylhydrolase IB subunit alpha OS=Homo sapiens OX=9606 GN=PAFAH1B1 PE=1 SV=2	PAFAH1B1	46.637	320.58	36.6	13	35	13	0.915	0.711	1.492	0.868	1.406	0.856	0.878	1.102	1.862	0.953	2.175	4.25215e-14	1.126	0.74078	1.699	2.44249e-15	0.911	0.109676	0.651	3.3871e-11	0.645	4.3216e-06
P43243	Matrin-3 OS=Homo sapiens OX=9606 GN=MATR3 PE=1 SV=2	MATR3	94.622	66.312	6.3	4	7	4	0.848	0.873	1.182	0.984	0.689	1.691	1.345	0.68	0.533	0.992	0.315	0.00092277	0.819	0.4767	0.879	0.5731	0.992	0.7108	1.231	0.58314	1.284	0.132925
P43246	DNA mismatch repair protein Msh2 OS=Homo sapiens OX=9606 GN=MSH2 PE=1 SV=1	MSH2	104.74	48.369	7.4	7	8	7	1.201	1.454	0.789	1.037	0.822	1.286	0.963	0.984	0.805	1.118	0.626	0.128759	1.022	0.97038	0.819	0.059357	0.928	0.27212	1.461	0.0082249	1.478	0.0031444
P43250	G protein-coupled receptor kinase 6 OS=Homo sapiens OX=9606 GN=GRK6 PE=1 SV=2	GRK6	65.99	18.367	6.4	3	3	3	1.105	0.999	0.781	1.354	0.842	0.876	1.066	0.908					1.148	0.36522	0.733				1.312		1.1
P43304	Glycerol-3-phosphate dehydrogenase, mitochondrial OS=Homo sapiens OX=9606 GN=GPD2 PE=1 SV=3	GPD2	80.852	101.85	14.4	11	13	11	1.149	1.473	0.946	1.067	0.913	0.997	1.059	1.021	0.631	0.98	0.633	0.00042017	1.06	0.8826	0.893	0.0071614	1.089	0.2183	1.258	0.00127966	1.443	1.70214e-05
P43307	Translocon-associated protein subunit alpha OS=Homo sapiens OX=9606 GN=SSR1 PE=1 SV=3	SSR1	32.235	9.8923	3.8	1	1	1	1.207	0.755	1.087	0.821	0.876	1.142	1.169	1.077	1.159	1.206	1.015		0.919	0.41498	0.93		0.681		1.378		0.701
P43353	Aldehyde dehydrogenase family 3 member B1 OS=Homo sapiens OX=9606 GN=ALDH3B1 PE=1 SV=1	ALDH3B1	51.839	42.2	14.3	5	5	5	1.244	1.75	0.666	1.207	1.089	0.89	1.117	0.987	0.511	0.648	0.574	0.007019	1.137	0.84004	0.596	0.043642	1.863	0.048336	1.142	0.94534	1.773	0.0066376
P43378	Tyrosine-protein phosphatase non-receptor type 9 OS=Homo sapiens OX=9606 GN=PTPN9 PE=1 SV=1	PTPN9	68.019	12.246	2.9	2	2	2
P43403	Tyrosine-protein kinase ZAP-70 OS=Homo sapiens OX=9606 GN=ZAP70 PE=1 SV=1	ZAP70	69.872	22.365	6.1	4	4	3	1.346	1.082	0.855	1.118	0.652	1.036	1.313	1.087	0.633	1.066	0.611	0.0081433	0.977	0.86424	0.651	0.023941	1.049	0.46946	2.064	0.0183371	0.995	0.93106
P43405	Tyrosine-protein kinase SYK OS=Homo sapiens OX=9606 GN=SYK PE=1 SV=1	SYK	72.065	89.888	16.4	10	12	9	1.022	1.414	0.84	1.098	1.009	0.864	1.192	0.976	0.915	1.146	1.059	0.65526	1.02	0.93022	0.705	0.025424	0.958	0.44526	1.013	0.59956	1.449	0.010298
P43487	Ran-specific GTPase-activating protein OS=Homo sapiens OX=9606 GN=RANBP1 PE=1 SV=1	RANBP1	23.31	47.655	24.4	4	16	4	0.832	0.841	1.515	0.828	1.268	0.895	0.751	1.001	2.225	0.896	2.486	1.9304e-08	1.297	0.41914	2.017	9.57312e-12	0.924	0.5049	0.656	4.4335e-07	0.84	0.20886
P43490	Nicotinamide phosphoribosyltransferase OS=Homo sapiens OX=9606 GN=NAMPT PE=1 SV=1	NAMPT	55.52	124.65	26.9	16	29	16	0.94	1.171	1.014	1.081	1.403	0.897	0.983	1.032	1.061	0.967	1.183	0.0026575	0.997	0.93448	1.032	0.73604	1.118	0.038116	0.67	1.4618e-10	1.135	0.020298
P43686	26S proteasome regulatory subunit 6B OS=Homo sapiens OX=9606 GN=PSMC4 PE=1 SV=2	PSMC4	47.366	163.08	29.9	15	34	15	0.83	0.964	1.037	1.131	1.17	1.021	1.078	1.106	1.263	0.99	1.237	5.5207e-05	0.974	0.664	0.962	0.507	1.142	0.0021407	0.709	4.2594e-09	0.872	0.016284
P43897	Elongation factor Ts, mitochondrial OS=Homo sapiens OX=9606 GN=TSFM PE=1 SV=2	TSFM	35.39	23.598	8.3	3	4	3	0.935	0.802	1.022	0.709	0.749	1.605	1.242	0.728	0.511	1.307	0.318	0.12368	0.707	0.140457	0.823	0.97588	0.542	0.0170619	1.248	0.09126	1.102	0.7012
P45844	ATP-binding cassette sub-family G member 1 OS=Homo sapiens OX=9606 GN=ABCG1 PE=1 SV=3	ABCG1	75.591	6.017	3.1	1	1	1	0.812	1.194	1.571	1.578	0.973	0.576	0.623	0.886	1.768	1.018	3.069		1.698	0.021698	2.522		1.55		0.835		1.348
P45880	Voltage-dependent anion-selective channel protein 2 OS=Homo sapiens OX=9606 GN=VDAC2 PE=1 SV=2	VDAC2	31.566	176.57	32.3	9	16	9	0.99	0.894	1.05	0.898	0.661	1.236	2.124	0.541	0.323	1	0.261	8.38e-05	0.747	0.4654	0.494	1.8247e-07	0.898	0.031019	1.498	0.00057763	1.652	0.000181254
P45954	Short/branched chain specific acyl-CoA dehydrogenase, mitochondrial OS=Homo sapiens OX=9606 GN=ACADSB PE=1 SV=1	ACADSB	47.485	39.675	12.3	4	6	4	0.783	0.811	0.927	0.832	0.684	2.182	0.998	0.704	0.418	1.439	0.192	0.0025035	0.628	0.166216	0.929	0.22178	0.578	3.7945e-05	1.145	0.10266	1.152	0.43552
P45973	Chromobox protein homolog 5 OS=Homo sapiens OX=9606 GN=CBX5 PE=1 SV=1	CBX5	22.225	20.859	16.8	3	5	3	1.07	1.126	1.127	1.086	0.556	1.316	1.096	0.863	0.58	0.965	0.441	0.0090422	1.04	0.80486	1.028	0.54576	1.125	0.30502	1.924	0.072357	1.305	0.4055
P45974	Ubiquitin carboxyl-terminal hydrolase 5 OS=Homo sapiens OX=9606 GN=USP5 PE=1 SV=2	USP5	95.785	323.31	30.8	23	59	23	0.908	0.915	1.167	1.017	1.314	0.971	0.921	1.051	1.737	0.932	1.789	1.62448e-12	1.107	0.57706	1.267	3.3667e-08	1.091	0.053482	0.691	1.62448e-12	0.871	0.00113759
P45984	Mitogen-activated protein kinase 9 OS=Homo sapiens OX=9606 GN=MAPK9 PE=1 SV=2	MAPK9	48.139	46.343	11.3	4	4	4	1.155	1.087	1.042	0.824	1.133	1.005	0.944	1.123	1.185	1.041	1.179	0.112183	1.009	0.96536	1.104	0.39664	0.792	0.35042	1.019	0.67984	0.968	0.86208
P45985	Dual specificity mitogen-activated protein kinase kinase 4 OS=Homo sapiens OX=9606 GN=MAP2K4 PE=1 SV=1	MAP2K4	44.287	13.833	6.3	2	2	2	0.853	1.225	0.912	1.737	0.979	0.806	0.848	1.006	1.281	1.076	1.589		1.274	0.161023	1.075		1.614		0.871		1.218
P46019	Phosphorylase b kinase regulatory subunit alpha, liver isoform OS=Homo sapiens OX=9606 GN=PHKA2 PE=1 SV=1	PHKA2	138.41	28.593	3.1	4	4	4	1.104	1.142	0.937	0.993	1.159	0.983	1.112	1.133	1.022	0.979	1.04	0.78658	0.969	0.54998	0.843	0.11354	1.014	0.60636	0.953	0.60402	1.008	0.91822
P46060	Ran GTPase-activating protein 1 OS=Homo sapiens OX=9606 GN=RANGAP1 PE=1 SV=1	RANGAP1	63.541	168.8	28.4	14	22	14	1.111	0.745	1.405	0.931	1.334	0.888	0.856	0.82	1.67	0.962	1.881	1.1894e-08	1.206	0.35968	1.641	1.0185e-08	0.968	0.83384	0.833	0.00062176	0.909	0.28512
P46063	ATP-dependent DNA helicase Q1 OS=Homo sapiens OX=9606 GN=RECQL PE=1 SV=3	RECQL	73.457	19.905	4.8	3	6	3	1.079	1.238	0.86	0.807	0.53	1.585	1.538	0.743	0.575	0.966	0.363	0.00100081	0.85	0.66782	0.559	0.00025724	0.835	0.159983	2.036	0.0083584	1.666	9.7631e-05
P46087	Probable 28S rRNA (cytosine(4447)-C(5))-methyltransferase OS=Homo sapiens OX=9606 GN=NOP2 PE=1 SV=2	NOP2	89.301	7.4659	1.8	1	1	1
P46100	Transcriptional regulator ATRX OS=Homo sapiens OX=9606 GN=ATRX PE=1 SV=5	ATRX	282.58	6.19	0.5	1	3	1	1.112	1.166	0.77	1.568	1.146	1.05	0.854	0.986	1.025	1.071	0.976	0.97498	1.105	0.54782	0.902	0.24718	1.464	0.41772	0.97	0.98318	1.183	0.39804
P46108	Adapter molecule crk OS=Homo sapiens OX=9606 GN=CRK PE=1 SV=2	CRK	33.83	6.3303	3.6	1	1	1
P46109	Crk-like protein OS=Homo sapiens OX=9606 GN=CRKL PE=1 SV=1	CRKL	33.777	34.967	13.9	3	7	3	0.926	0.74	1.409	0.812	1.422	0.806	0.754	1.155	1.903	1.128	2.361	0.0022233	1.1	0.7998	1.869	0.0024236	0.72	0.00024128	0.651	0.332	0.641	0.00045893
P46379	Large proline-rich protein BAG6 OS=Homo sapiens OX=9606 GN=BAG6 PE=1 SV=2	BAG6	119.41	82.298	8.2	8	8	8	1.226	1.558	0.927	0.931	0.549	1.126	0.649	1.339	0.837	1.186	0.743	0.035422	1.13	0.48568	1.428	0.024559	0.785	0.0043237	2.233	0.0017989	1.164	0.105176
P46439	Glutathione S-transferase Mu 5 OS=Homo sapiens OX=9606 GN=GSTM5 PE=1 SV=3	GSTM5	25.674	27.544	21.1	5	6	0
P46459	Vesicle-fusing ATPase OS=Homo sapiens OX=9606 GN=NSF PE=1 SV=3	NSF	82.593	317.52	36.2	26	74	26	0.972	0.699	1.236	1.051	1.437	0.92	1.105	0.972	1.575	0.912	1.712	1e-32	1.035	0.93114	1.119	0.0009153	1.152	3.3214e-06	0.676	1.62448e-12	0.719	4.3903e-11
P46527	Cyclin-dependent kinase inhibitor 1B OS=Homo sapiens OX=9606 GN=CDKN1B PE=1 SV=1	CDKN1B	22.073	20.015	16.2	3	3	3
P46734	Dual specificity mitogen-activated protein kinase kinase 3 OS=Homo sapiens OX=9606 GN=MAP2K3 PE=1 SV=2	MAP2K3	39.318	96.833	28.2	10	17	10	1.171	1.744	0.655	0.989	0.785	1.206	0.588	1.086	0.844	0.972	0.7	0.0118232	1.165	0.5545	1.114	0.111158	1.017	0.57096	1.492	4.4127e-05	1.606	2.0331e-05
P46736	Lys-63-specific deubiquitinase BRCC36 OS=Homo sapiens OX=9606 GN=BRCC3 PE=1 SV=2	BRCC3	36.072	85.498	20.9	6	6	6	0.944	1.076	0.977	1.104	1.146	1.124	0.952	1.09	1.272	0.944	1.132	0.76106	1.022	0.77396	1.026	0.177221	1.169	0.4413	0.824	0.119841	0.987	0.8519
P46776	60S ribosomal protein L27a OS=Homo sapiens OX=9606 GN=RPL27A PE=1 SV=2	RPL27A	16.561	31.386	15.5	2	4	2	1.35	0.364	1.109	1.014	0.302	2.937	0.785	0.548	0.429	0.685	0.146		0.811	0.96716	1.413		1.48		4.47		0.664
P46777	60S ribosomal protein L5 OS=Homo sapiens OX=9606 GN=RPL5 PE=1 SV=3	RPL5	34.362	96.827	26.6	8	41	8	1.494	0.994	0.856	0.789	0.428	1.883	0.684	1.015	0.375	1.292	0.199	2.43139e-14	0.85	0.71134	1.251	0.0005615	0.611	1.4596e-11	3.491	8.77076e-15	0.979	0.69936
P46779	60S ribosomal protein L28 OS=Homo sapiens OX=9606 GN=RPL28 PE=1 SV=3	RPL28	15.747	39.588	22.6	4	9	4	1.489	0.518	0.92	0.691	0.402	2.534	0.824	0.761	0.386	1.17	0.152	4.7385e-06	0.704	0.49134	1.117	0.012578	0.591	5.0451e-08	3.704	8.1683e-05	0.681	0.0173965
P46781	40S ribosomal protein S9 OS=Homo sapiens OX=9606 GN=RPS9 PE=1 SV=3	RPS9	22.591	30.826	22.7	5	8	5	1.459	0.844	0.911	0.642	0.581	1.873	0.732	0.857	0.405	1.407	0.216	0.084115	0.782	0.45174	1.245	0.024222	0.456	0.036304	2.511	0.024857	0.985	0.93204
P46782	40S ribosomal protein S5 OS=Homo sapiens OX=9606 GN=RPS5 PE=1 SV=4	RPS5	22.876	25.742	12.7	4	7	4	1.552	0.798	1.084	0.891	0.447	1.864	0.759	0.781	0.416	1.307	0.223	0.000183175	0.919	0.87758	1.428	0.029343	0.682	0.00025566	3.472	0.00068309	1.022	0.42888
P46783	40S ribosomal protein S10 OS=Homo sapiens OX=9606 GN=RPS10 PE=1 SV=1	RPS10	18.898	61.964	34.5	6	11	6	1.467	0.731	1.105	0.84	0.448	2.205	0.759	0.682	0.459	0.995	0.208	1.68932e-05	0.904	0.94952	1.456	0.047421	0.844	0.119501	3.275	0.00122477	1.072	0.74846
P46926	Glucosamine-6-phosphate isomerase 1 OS=Homo sapiens OX=9606 GN=GNPDA1 PE=1 SV=1	GNPDA1	32.668	59.573	20.4	6	14	5	0.905	0.874	1.608	0.722	1.734	0.469	0.694	1.369	1.688	1.09	3.599	0.00025743	1.082	0.68706	2.317	0.000137547	0.662	0.027303	0.522	5.5941e-05	0.638	0.012737
P46934	E3 ubiquitin-protein ligase NEDD4 OS=Homo sapiens OX=9606 GN=NEDD4 PE=1 SV=4	NEDD4	149.11	79.005	1.7	1	2	1	1.136	1.036	1.104	1.191	1.545	0.918	0.889	0.977	0.878	1.014	0.956		1	0.88582	1.242		1.175		0.735		1.06
P46939	Utrophin OS=Homo sapiens OX=9606 GN=UTRN PE=1 SV=2	UTRN	394.46	45.336	2.2	7	7	7	1.433	1.613	0.803	1.069	0.785	0.843	0.905	1.036	0.535	1.126	0.635	0.0104623	1.161	0.70176	0.887	0.120801	0.949	0.35582	1.825	0.000115894	1.557	0.00028332
P46940	Ras GTPase-activating-like protein IQGAP1 OS=Homo sapiens OX=9606 GN=IQGAP1 PE=1 SV=1	IQGAP1	189.25	323.31	29.6	46	75	45	1.062	1.774	0.816	1.353	0.749	0.99	1.042	0.957	0.608	0.871	0.614	2.52587e-12	1.218	0.52916	0.783	3.7963e-07	1.553	1e-32	1.418	3.9968e-15	1.854	1.62448e-12
P46976	Glycogenin-1 OS=Homo sapiens OX=9606 GN=GYG1 PE=1 SV=4	GYG1	39.383	10.063	2.9	1	1	1
P46977	Dolichyl-diphosphooligosaccharide--protein glycosyltransferase subunit STT3A OS=Homo sapiens OX=9606 GN=STT3A PE=1 SV=2	STT3A	80.529	91.451	15.6	12	24	12	1.266	0.937	0.874	0.731	0.456	1.853	1.329	0.908	0.298	0.933	0.161	4.85278e-13	0.749	0.42014	0.658	4.8963e-09	0.783	5.5928e-07	2.776	4.796e-10	1.032	0.4059
P47712	Cytosolic phospholipase A2 OS=Homo sapiens OX=9606 GN=PLA2G4A PE=1 SV=2	PLA2G4A	85.238	24.522	6.1	4	4	4	0.957	1.274	1.2	0.866	0.92	1.602	0.648	1.085	0.889	0.823	0.555	0.22788	1.021	0.75272	1.852	0.050423	1.052	0.84402	1.04	0.82318	1.174	0.153497
P47755	F-actin-capping protein subunit alpha-2 OS=Homo sapiens OX=9606 GN=CAPZA2 PE=1 SV=3	CAPZA2	32.949	91.087	23.4	5	15	4	0.975	1.394	0.87	1.104	0.957	0.767	0.992	1.108	1.342	1.025	1.75	0.00036074	1.172	0.2078	0.877	0.47472	1.077	0.136944	1.019	0.3551	1.258	0.25612
P47756	F-actin-capping protein subunit beta OS=Homo sapiens OX=9606 GN=CAPZB PE=1 SV=4	CAPZB	31.35	235.9	47.3	14	42	14	0.924	1.458	0.939	1.187	1.049	0.685	0.903	1.144	1.32	0.979	1.927	1.3928e-11	1.224	0.150878	1.04	0.040801	1.212	0.0087179	0.881	0.152601	1.274	1.4931e-07
P47813	Eukaryotic translation initiation factor 1A, X-chromosomal OS=Homo sapiens OX=9606 GN=EIF1AX PE=1 SV=2	EIF1AX	16.46	9.5386	28.5	4	9	1	0.84	0.793	1.288	0.626	0.9	1.204	1.064	1.031	1.114	1.443	0.925	0.4824	0.826	0.199244	1.211	0.36268	0.434	0.00192171	0.933	0.8885	0.769	0.053
P47897	Glutamine--tRNA ligase OS=Homo sapiens OX=9606 GN=QARS PE=1 SV=1	QARS	87.798	120.07	15.7	13	15	12	1.322	1.322	0.9	0.878	0.771	1.368	0.981	0.969	0.561	1.065	0.41	0.007478	0.967	0.73598	0.917	0.055083	0.824	0.045664	1.715	0.00033838	1.364	0.00146085
P47914	60S ribosomal protein L29 OS=Homo sapiens OX=9606 GN=RPL29 PE=1 SV=2	RPL29	17.752	13.57	14.5	2	2	2	0.928	0.533	1.102	0.8	0.433	2.967	0.689	0.511	0.458	1.245	0.154	0.09082	0.654	0.60738	1.599	0.094661	0.643	0.155562	2.143	0.10956	1.043	0.99336
P47974	mRNA decay activator protein ZFP36L2 OS=Homo sapiens OX=9606 GN=ZFP36L2 PE=1 SV=3	ZFP36L2	51.062	11.548	4.7	2	2	2
P47985	Cytochrome b-c1 complex subunit Rieske, mitochondrial OS=Homo sapiens OX=9606 GN=UQCRFS1 PE=1 SV=2	UQCRFS1	29.668	21.949	9.5	3	5	3	1.138	0.777	0.626	0.656	0.576	1.815	1.751	0.821	0.423	1.059	0.233	0.078175	0.601	0.124824	0.358	0.00064247	0.619	0.043475	1.976	0.135221	0.946	0.96838
P48047	ATP synthase subunit O, mitochondrial OS=Homo sapiens OX=9606 GN=ATP5O PE=1 SV=1	ATP5O	23.277	105.48	43.2	8	15	8	0.849	0.556	1.165	0.775	0.54	1.856	2.074	0.608	0.382	0.805	0.206	1.2654e-07	0.634	0.31286	0.562	4.8528e-07	0.963	0.3655	1.572	0.0021981	0.914	0.94072
P48059	LIM and senescent cell antigen-like-containing domain protein 1 OS=Homo sapiens OX=9606 GN=LIMS1 PE=1 SV=4	LIMS1	37.251	37.997	15.1	4	8	4	1.172	1.489	0.573	1.121	0.866	0.883	1.506	0.758	0.522	0.714	0.591	0.076955	1.032	0.9605	0.38	0.023096	1.57	0.0054047	1.353	0.0061428	1.964	0.0180589
P48147	Prolyl endopeptidase OS=Homo sapiens OX=9606 GN=PREP PE=1 SV=2	PREP	80.699	122.83	20.8	13	14	13	1.092	1.157	1.018	1.099	1.156	0.869	0.812	1.282	1.061	1.018	1.221	0.09062	1.056	0.47868	1.254	0.0096628	1.08	0.097078	0.945	0.26018	0.902	0.22258
P48200	Iron-responsive element-binding protein 2 OS=Homo sapiens OX=9606 GN=IREB2 PE=1 SV=3	IREB2	105.04	7.9489	0.9	1	1	1	0.943	0.94	0.855	0.916	1.284	0.778	0.866	1.74	1.165	1.302	1.497		0.807	0.28896	0.987		0.704		0.734		0.54
P48426	Phosphatidylinositol 5-phosphate 4-kinase type-2 alpha OS=Homo sapiens OX=9606 GN=PIP4K2A PE=1 SV=2	PIP4K2A	46.224	229.27	29.8	13	38	8	0.733	1.21	0.978	1.234	1.487	0.698	1.065	1.027	1.668	0.854	2.39	1.33227e-15	1.135	0.52878	0.918	0.0045753	1.445	4.8662e-07	0.493	2.7638e-11	1.178	0.00039847
P48444	Coatomer subunit delta OS=Homo sapiens OX=9606 GN=ARCN1 PE=1 SV=1	ARCN1	57.21	156.45	28.8	15	28	15	1.257	0.855	1.084	0.866	0.638	1.649	1.005	0.939	0.402	1.076	0.244	2.14839e-12	0.841	0.45766	1.079	0.100376	0.805	0.0028415	1.97	2.7719e-10	0.911	0.78438
P48449	Lanosterol synthase OS=Homo sapiens OX=9606 GN=LSS PE=1 SV=1	LSS	83.308	52.51	9.4	6	6	6	1.343	0.953	1.29	0.697	0.849	1.38	0.982	0.876	0.502	1.311	0.364		0.886	0.45912	1.314		0.532		1.582		1.088
P48454	Serine/threonine-protein phosphatase 2B catalytic subunit gamma isoform OS=Homo sapiens OX=9606 GN=PPP3CC PE=1 SV=3	PPP3CC	58.129	7.5712	6.1	3	3	1
P48506	Glutamate--cysteine ligase catalytic subunit OS=Homo sapiens OX=9606 GN=GCLC PE=1 SV=2	GCLC	72.765	323.31	35.2	22	49	22	0.882	0.995	1.097	0.969	1.548	0.665	0.998	1.254	1.504	1.015	2.262	1e-32	0.994	0.93518	1.099	0.00182047	0.955	0.23498	0.57	1e-32	0.793	3.5785e-08
P48507	Glutamate--cysteine ligase regulatory subunit OS=Homo sapiens OX=9606 GN=GCLM PE=1 SV=1	GCLM	30.727	226.19	34.3	8	19	8	0.875	0.909	1.372	0.94	1.761	0.54	0.753	1.223	1.828	0.917	3.385	2.75689e-11	1.141	0.51408	1.822	4.3637e-09	1.025	0.43464	0.497	5.92415e-13	0.743	0.0077818
P48556	26S proteasome non-ATPase regulatory subunit 8 OS=Homo sapiens OX=9606 GN=PSMD8 PE=1 SV=2	PSMD8	39.611	53.06	17.1	6	11	6	0.89	0.992	0.919	1.022	1.172	1.152	1.094	1.146	1.212	1.08	1.052	0.130442	0.892	0.100363	0.84	0.072636	0.946	0.4557	0.759	0.00052063	0.866	0.164124
P48595	Serpin B10 OS=Homo sapiens OX=9606 GN=SERPINB10 PE=1 SV=1	SERPINB10	45.402	79.012	14.4	5	5	5	0.691	1.854	0.817	0.991	1.321	0.515	0.714	1.377	0.757	1.285	1.47	0.076319	0.98	0.9475	1.144	0.43176	0.771	0.048375	0.523	0.0041583	1.346	0.020999
P48637	Glutathione synthetase OS=Homo sapiens OX=9606 GN=GSS PE=1 SV=1	GSS	52.384	110.77	27.8	14	17	14	1.013	0.845	1.462	0.787	1.808	0.425	0.554	1.255	2.269	0.991	5.339	6.45706e-12	1.267	0.40788	2.639	3.5956e-09	0.794	0.0080229	0.56	2.7004e-06	0.673	0.0040813
P48643	T-complex protein 1 subunit epsilon OS=Homo sapiens OX=9606 GN=CCT5 PE=1 SV=1	CCT5	59.67	218.89	28.5	20	69	20	0.709	0.911	1.033	1.063	1.486	1.097	1.065	1.212	1.178	0.892	1.074	0.0010001	0.851	0.21736	0.97	0.22174	1.192	2.0752e-09	0.477	1e-32	0.752	1e-32
P48681	Nestin OS=Homo sapiens OX=9606 GN=NES PE=1 SV=2	NES	177.44	111.5	9	13	16	13	0.469	0.439	0.388	0.407	0.457	4.761	0.434	0.617	0.367	0.749	0.077	1.6277e-12	0.295	0.181119	0.894	0.97438	0.543	0.0022155	1.026	0.93858	0.712	0.37774
P48729	Casein kinase I isoform alpha OS=Homo sapiens OX=9606 GN=CSNK1A1 PE=1 SV=2	CSNK1A1	38.914	55.897	24	8	15	8	0.759	0.671	1.094	1.273	1.531	0.779	1.068	0.889	1.963	1.11	2.52	2.8641e-10	1.071	0.92924	1.024	0.62936	1.147	0.0041753	0.496	1.6929e-10	0.755	4.7914e-06
P48735	Isocitrate dehydrogenase [NADP], mitochondrial OS=Homo sapiens OX=9606 GN=IDH2 PE=1 SV=2	IDH2	50.909	302.98	36.1	15	46	15	1.57	0.617	0.859	0.658	0.717	1.097	2.853	0.408	0.399	0.676	0.364	1.62448e-12	0.713	0.61372	0.301	1e-32	0.973	0.186685	2.19	1e-32	1.512	1.8803e-10
P48739	Phosphatidylinositol transfer protein beta isoform OS=Homo sapiens OX=9606 GN=PITPNB PE=1 SV=2	PITPNB	31.54	44.819	18.1	4	4	4	0.873	0.92	1.12	0.85	1.725	0.786	0.818	1.387	1.303	1.172	1.658	0.00115845	0.86	0.51038	1.369	0.032041	0.725	0.0157647	0.506	0.00106013	0.663	0.0073818
P48740	Mannan-binding lectin serine protease 1 OS=Homo sapiens OX=9606 GN=MASP1 PE=1 SV=3	MASP1	79.246	6.3773	2.3	1	1	1
P48960	CD97 antigen OS=Homo sapiens OX=9606 GN=CD97 PE=1 SV=4	CD97	91.868	55.395	6	5	7	5	0.963	1.53	0.794	1.123	0.55	0.927	1.037	1.123	0.382	1.555	0.412	0.077383	0.923	0.68254	0.766	0.185722	0.722	0.071119	1.751	0.066199	1.362	0.027305
P49023	Paxillin OS=Homo sapiens OX=9606 GN=PXN PE=1 SV=3	PXN	64.505	46.741	7.1	3	4	3	1.304	1.748	0.641	1.314	0.879	0.852	1.018	0.947	0.624	0.965	0.732	0.134196	1.208	0.63464	0.63	0.042842	1.362	0.021556	1.484	0.012238	1.846	0.041339
P49137	MAP kinase-activated protein kinase 2 OS=Homo sapiens OX=9606 GN=MAPKAPK2 PE=1 SV=1	MAPKAPK2	45.567	6.1522	8	3	3	1
P49189	4-trimethylaminobutyraldehyde dehydrogenase OS=Homo sapiens OX=9606 GN=ALDH9A1 PE=1 SV=3	ALDH9A1	53.801	182.6	31	12	30	12	0.785	0.846	1.261	0.996	1.327	0.986	1.004	1.171	1.306	0.914	1.325	2.2461e-05	0.961	0.68794	1.256	2.1106e-07	1.09	0.081858	0.592	2.60569e-13	0.722	3.2266e-08
P49207	60S ribosomal protein L34 OS=Homo sapiens OX=9606 GN=RPL34 PE=1 SV=3	RPL34	13.293	13.475	14.5	2	7	2	1.408	0.648	0.818	0.693	0.522	2.203	0.795	0.968	0.314	1.399	0.143	0.00029776	0.659	0.27138	1.029	0.80604	0.495	8.0454e-05	2.697	0.0029375	0.669	0.00198226
P49247	Ribose-5-phosphate isomerase OS=Homo sapiens OX=9606 GN=RPIA PE=1 SV=3	RPIA	33.269	92.132	31.2	9	24	9	0.702	0.748	1.646	0.616	2.267	0.424	0.557	1.5	1.77	1.149	4.175	1.80655e-12	0.93	0.99152	2.955	1.46549e-14	0.536	1.61093e-13	0.31	1.62548e-12	0.499	2.2512e-08
P49257	Protein ERGIC-53 OS=Homo sapiens OX=9606 GN=LMAN1 PE=1 SV=2	LMAN1	57.548	241.01	25.3	13	21	13	1.724	0.786	0.919	0.973	0.494	1.532	0.975	0.722	0.443	1.254	0.289	5.8013e-10	0.973	0.88614	0.943	0.67356	0.776	0.003962	3.49	1.9946e-09	1.089	0.82246
P49321	Nuclear autoantigenic sperm protein OS=Homo sapiens OX=9606 GN=NASP PE=1 SV=2	NASP	85.237	74.913	14.6	10	13	10	1.062	0.878	1.159	1.104	0.708	1.113	0.943	1.1	0.79	1.449	0.71	0.23324	0.94	0.74948	1.229	0.004521	0.762	0.0112583	1.5	0.0032209	0.798	0.029202
P49327	Fatty acid synthase OS=Homo sapiens OX=9606 GN=FASN PE=1 SV=3	FASN	273.42	323.31	21.1	47	75	47	0.748	0.74	1.057	0.908	1.336	1.328	0.918	1.212	0.959	1.367	0.722	1.0533e-09	0.716	0.0112974	1.151	0.000141573	0.664	1e-32	0.56	1e-32	0.611	1.62448e-12
P49354	Protein farnesyltransferase/geranylgeranyltransferase type-1 subunit alpha OS=Homo sapiens OX=9606 GN=FNTA PE=1 SV=1	FNTA	44.408	9.1164	2.6	1	2	1	1.257	1.286	0.955	0.871	0.52	1.452	0.865	1.013	0.707	1.185	0.487		1.008	0.85728	1.104		0.735		2.417		1.269
P49368	T-complex protein 1 subunit gamma OS=Homo sapiens OX=9606 GN=CCT3 PE=1 SV=4	CCT3	60.533	323.31	47.9	26	88	26	0.742	0.873	0.988	1.052	1.477	1.069	1.103	1.038	1.249	0.904	1.168	2.1156e-05	0.877	0.2965	0.896	0.68342	1.164	4.6288e-09	0.502	1e-32	0.841	2.9673e-08
P49406	39S ribosomal protein L19, mitochondrial OS=Homo sapiens OX=9606 GN=MRPL19 PE=1 SV=2	MRPL19	33.535	24.739	10.3	3	3	3	0.823	0.716	1.446	0.66	0.641	1.885	1.229	0.811	0.457	1.294	0.242		0.7	0.21244	1.177		0.51		1.284		0.883
P49407	Beta-arrestin-1 OS=Homo sapiens OX=9606 GN=ARRB1 PE=1 SV=2	ARRB1	47.065	79.838	12.2	6	7	6	1.093	1.405	1.025	1.023	1.423	0.508	0.874	1.154	1.333	0.889	2.624	1.69398e-05	1.213	0.23288	1.173	0.06472	1.151	0.145383	0.768	0.0039227	1.218	0.25802
P49411	Elongation factor Tu, mitochondrial OS=Homo sapiens OX=9606 GN=TUFM PE=1 SV=2	TUFM	49.541	176.49	42.7	16	29	16	0.897	0.648	1.456	0.823	0.53	1.69	1.307	0.724	0.475	1.313	0.281	4.0618e-10	0.773	0.41806	1.114	0.0041164	0.627	2.2472e-11	1.692	0.000136506	0.895	0.23954
P49419	Alpha-aminoadipic semialdehyde dehydrogenase OS=Homo sapiens OX=9606 GN=ALDH7A1 PE=1 SV=5	ALDH7A1	58.486	11.733	3.9	2	2	2	1.492	1.104	0.722	0.76	1.044	1.477	0.854	0.753	0.738	1.375	0.5		0.875	0.48204	0.845		0.553		1.429		1.466
P49458	Signal recognition particle 9 kDa protein OS=Homo sapiens OX=9606 GN=SRP9 PE=1 SV=2	SRP9	10.112	42.524	54.7	5	12	5	1.232	1.075	1.074	0.867	0.614	1.68	1.132	0.908	0.323	0.993	0.192	0.000181073	0.858	0.52524	0.949	0.45514	0.873	0.108281	2.007	0.00069527	1.184	0.03298
P49585	Choline-phosphate cytidylyltransferase A OS=Homo sapiens OX=9606 GN=PCYT1A PE=1 SV=2	PCYT1A	41.731	24.063	9.5	3	3	3	1.122	1.279	1.62	0.889	0.818	0.84	1.208	0.88	0.824	0.872	0.981	0.96788	1.242	0.20278	1.341	0.73858	1.019	0.8496	1.372	0.2738	1.453	0.34238
P49588	Alanine--tRNA ligase, cytoplasmic OS=Homo sapiens OX=9606 GN=AARS PE=1 SV=2	AARS	106.81	260.85	22.9	22	34	22	1.212	1.144	0.938	0.878	0.519	1.905	0.541	1.172	0.539	1.015	0.283	4.10783e-15	0.914	0.98192	1.734	2.2218e-07	0.865	0.108081	2.335	5.7169e-10	0.976	0.30694
P49589	Cysteine--tRNA ligase, cytoplasmic OS=Homo sapiens OX=9606 GN=CARS PE=1 SV=3	CARS	85.472	134.03	22.1	17	25	17	1.066	0.86	0.836	0.799	1.254	1.179	0.805	1.376	1.054	1.21	0.894	0.96364	0.792	0.076602	1.039	0.47874	0.66	7.5071e-08	0.85	0.047996	0.625	6.6198e-07
P49590	Probable histidine--tRNA ligase, mitochondrial OS=Homo sapiens OX=9606 GN=HARS2 PE=1 SV=1	HARS2	56.888	8.5035	10.3	5	6	1	0.886	0.833	0.772	0.876	0.931	2.316	0.904	0.718	0.644	1.147	0.278		0.667	0.198497	0.854		0.764		0.952		1.16
P49591	Serine--tRNA ligase, cytoplasmic OS=Homo sapiens OX=9606 GN=SARS PE=1 SV=3	SARS	58.777	106.01	17.3	8	12	8	1.142	0.922	0.984	0.779	0.62	1.847	0.705	1.072	0.531	1.266	0.287	1.7856e-08	0.791	0.4524	1.396	0.00110089	0.615	0.00036168	1.842	1.9767e-06	0.86	0.2539
P49593	Protein phosphatase 1F OS=Homo sapiens OX=9606 GN=PPM1F PE=1 SV=3	PPM1F	49.83	61.992	14.5	5	6	5	1.088	1.012	0.987	1.213	1.012	1.12	1.017	0.871	1.108	0.999	0.989	0.76542	1.078	0.20332	0.971	0.26868	1.214	0.044323	1.075	0.25972	1.162	0.147324
P49642	DNA primase small subunit OS=Homo sapiens OX=9606 GN=PRIM1 PE=1 SV=1	PRIM1	49.901	7.1137	2.9	1	1	1
P49662	Caspase-4 OS=Homo sapiens OX=9606 GN=CASP4 PE=1 SV=1	CASP4	43.262	12.243	4.5	2	3	2	1.15	1.431	1.031	1.003	0.789	1.075	1.078	0.924	0.843	0.98	0.784	0.44678	1.126	0.32372	0.956	0.61224	1.023	0.7976	1.458	0.025264	1.549	0.03326
P49720	Proteasome subunit beta type-3 OS=Homo sapiens OX=9606 GN=PSMB3 PE=1 SV=2	PSMB3	22.949	70.984	33.2	8	17	8	0.86	0.948	0.964	1.06	1.136	0.923	1.02	1.017	1.425	1.09	1.544	6.365e-05	1.014	0.9978	0.945	0.50166	0.972	0.69606	0.757	0.000216	0.932	0.084123
P49721	Proteasome subunit beta type-2 OS=Homo sapiens OX=9606 GN=PSMB2 PE=1 SV=1	PSMB2	22.836	78.517	27.4	6	23	6	0.787	0.855	1.145	1.095	1.355	0.881	1.151	0.972	1.775	0.857	2.015	2.7053e-11	1.085	0.75504	0.995	0.35174	1.278	2.3707e-07	0.581	3.21965e-15	0.88	0.00100445
P49736	DNA replication licensing factor MCM2 OS=Homo sapiens OX=9606 GN=MCM2 PE=1 SV=4	MCM2	101.89	81.044	11.7	10	16	10	1.125	1.484	0.907	0.854	0.752	1.025	0.947	1.099	0.447	1.519	0.436	0.0042413	0.902	0.5339	0.958	0.24012	0.562	2.5576e-06	1.496	0.0002012	1.35	0.097684
P49748	Very long-chain specific acyl-CoA dehydrogenase, mitochondrial OS=Homo sapiens OX=9606 GN=ACADVL PE=1 SV=1	ACADVL	70.389	260.47	33.3	19	40	19	0.92	1.092	0.922	0.979	0.802	1.586	0.794	0.733	0.509	1.575	0.321	1.62459e-12	0.805	0.4247	1.161	0.0143036	0.622	8.2616e-10	1.147	0.0185214	1.49	5.60219e-13
P49754	Vacuolar protein sorting-associated protein 41 homolog OS=Homo sapiens OX=9606 GN=VPS41 PE=1 SV=3	VPS41	98.565	15.993	2.7	2	2	2	1.201	1.266	0.86	1.06	0.964	1.046	0.974	0.877	0.986	1.259	0.943	0.75424	1.049	0.62834	0.883	0.4086	0.842	0.25212	1.246	0.35226	1.444	0.0108163
P49755	Transmembrane emp24 domain-containing protein 10 OS=Homo sapiens OX=9606 GN=TMED10 PE=1 SV=2	TMED10	24.976	28.504	14.6	3	10	3	1.213	1.107	1.107	1.089	0.698	1.084	1.002	0.789	0.514	1.174	0.474	0.028783	1.06	0.86006	1.105	0.61746	0.928	0.20204	1.738	0.0064602	1.403	0.0094036
P49756	RNA-binding protein 25 OS=Homo sapiens OX=9606 GN=RBM25 PE=1 SV=3	RBM25	100.18	11.07	2.1	2	2	2	1.182	1.486	0.667	0.856	1.211	1.168	0.891	1.12	0.891	0.97	0.763		0.948	0.58574	0.749		0.882		0.976		1.327
P49757	Protein numb homolog OS=Homo sapiens OX=9606 GN=NUMB PE=1 SV=2	NUMB	70.803	12.974	3.7	2	3	2
P49770	Translation initiation factor eIF-2B subunit beta OS=Homo sapiens OX=9606 GN=EIF2B2 PE=1 SV=3	EIF2B2	38.989	24.099	11.1	3	3	3	1.051	1.106	0.936	1.093	0.97	1.214	1.086	0.976	0.962	1.103	0.792	0.20898	0.962	0.51068	0.862	0.3268	0.991	0.98506	1.084	0.40774	1.133	0.4366
P49773	Histidine triad nucleotide-binding protein 1 OS=Homo sapiens OX=9606 GN=HINT1 PE=1 SV=2	HINT1	13.802	48.507	30.2	3	3	3	0.732	0.612	0.778	0.779	2.401	1.196	0.995	0.93	2.025	0.895	1.693	0.027821	0.768	0.32446	0.782	0.38364	0.87	0.7173	0.305	0.0054014	0.658	0.048217
P49792	E3 SUMO-protein ligase RanBP2 OS=Homo sapiens OX=9606 GN=RANBP2 PE=1 SV=2	RANBP2	358.2	127.2	7.7	16	18	16	1.37	0.894	0.839	0.853	0.642	1.612	1.038	0.944	0.538	1.137	0.334	2.6588e-10	0.836	0.4189	0.808	0.029556	0.75	0.00108384	2.134	1.0189e-07	0.947	0.81698
P49795	Regulator of G-protein signaling 19 OS=Homo sapiens OX=9606 GN=RGS19 PE=1 SV=1	RGS19	24.635	6.8599	6.5	1	1	1	1.17	1.312	1.093	1	0.915	1.255	0.995	0.851	0.762	0.922	0.607		1.081	0.54926	1.098		1.085		1.279		1.542
P49821	NADH dehydrogenase [ubiquinone] flavoprotein 1, mitochondrial OS=Homo sapiens OX=9606 GN=NDUFV1 PE=1 SV=4	NDUFV1	50.817	56.7	14.7	7	12	7	1.182	1.227	0.6	1.205	0.581	1.298	1.202	0.766	0.66	1.239	0.508	4.4885e-06	0.958	0.852	0.499	3.6189e-06	0.973	0.74894	2.034	0.00125916	1.602	3.7728e-05
P49840	Glycogen synthase kinase-3 alpha OS=Homo sapiens OX=9606 GN=GSK3A PE=1 SV=2	GSK3A	50.98	38.057	7.5	3	4	1
P49841	Glycogen synthase kinase-3 beta OS=Homo sapiens OX=9606 GN=GSK3B PE=1 SV=2	GSK3B	46.744	6.0037	6.7	3	4	1
P49863	Granzyme K OS=Homo sapiens OX=9606 GN=GZMK PE=1 SV=1	GZMK	28.882	17.834	10.6	2	2	2	1.378	1.432	0.88	0.931	0.528	1.249	1.132	0.992	0.508	0.983	0.407		1.05	0.92258	0.777		0.947		2.61		1.444
P49902	Cytosolic purine 5'-nucleotidase OS=Homo sapiens OX=9606 GN=NT5C2 PE=1 SV=1	NT5C2	64.969	18.976	4.6	2	2	2	1.09	1.56	0.823	1.06	0.885	0.876	0.965	1.215	0.88	1.071	1.005		1.08	0.65752	0.853		0.99		1.232		1.284
P49903	Selenide, water dikinase 1 OS=Homo sapiens OX=9606 GN=SEPHS1 PE=1 SV=2	SEPHS1	42.91	30.34	8.4	2	3	2	1.057	1.554	1.368	1.045	0.717	1.036	0.982	1.041	0.59	0.782	0.569	0.23194	1.232	0.38324	1.393	0.3632	1.336	0.127757	1.474	0.40556	1.493	0.081818
P49913	Cathelicidin antimicrobial peptide OS=Homo sapiens OX=9606 GN=CAMP PE=1 SV=1	CAMP	19.301	99.711	34.1	9	18	9	1.143	2.896	0.618	0.853	0.888	0.335	0.648	1.368	0.57	1.101	1.701	0.002098	1.401	0.53738	0.954	0.152838	0.775	3.0829e-06	1.287	1.73622e-05	2.117	1.42752e-12
P49915	GMP synthase [glutamine-hydrolyzing] OS=Homo sapiens OX=9606 GN=GMPS PE=1 SV=1	GMPS	76.715	185.01	17.7	12	18	12	1.029	1.085	1.206	1.055	1.215	0.846	0.896	1.212	1.121	1.064	1.325	0.000117785	1.05	0.48448	1.346	0.0128019	0.992	0.87422	0.847	0.00095787	0.895	0.59282
P49917	DNA ligase 4 OS=Homo sapiens OX=9606 GN=LIG4 PE=1 SV=2	LIG4	103.97	5.9297	1.3	1	2	1	1.005	1.321	0.834	1.152	1.624	0.773	0.958	0.808	1.472	1.013	1.904	0.020577	1.117	0.45828	0.871	0.058219	1.137	0.51172	0.619	0.025338	1.635	0.099478
P49959	Double-strand break repair protein MRE11 OS=Homo sapiens OX=9606 GN=MRE11 PE=1 SV=3	MRE11	80.592	23.845	3.1	2	4	2	0.988	1.067	1.026	1.013	0.846	1.485	1.082	0.85	0.846	1.054	0.57	0.108664	0.929	0.6344	0.948	0.80866	0.961	0.95844	1.168	0.0093985	1.255	0.6941
P50148	Guanine nucleotide-binding protein G(q) subunit alpha OS=Homo sapiens OX=9606 GN=GNAQ PE=1 SV=4	GNAQ	42.142	47.586	20.9	7	10	4	0.982	2.245	0.675	1.264	0.766	0.658	1.07	1.043	0.697	0.9	1.059		1.321	0.45038	0.631		1.404		1.282		2.152
P50213	Isocitrate dehydrogenase [NAD] subunit alpha, mitochondrial OS=Homo sapiens OX=9606 GN=IDH3A PE=1 SV=1	IDH3A	39.591	78.716	23.5	9	15	9	1.13	0.582	1.273	0.642	0.728	1.36	2.495	0.552	0.306	0.864	0.225	0.00031719	0.656	0.31622	0.51	5.9914e-05	0.743	0.039598	1.552	0.0060401	1.054	0.75272
P50225	Sulfotransferase 1A1 OS=Homo sapiens OX=9606 GN=SULT1A1 PE=1 SV=3	SULT1A1	34.165	39.537	19.3	5	8	5	0.915	2.821	0.607	0.946	0.433	1.411	0.769	0.824	0.461	0.593	0.327	0.00011771	1.427	0.56714	0.789	0.0161966	1.595	0.0121427	2.113	0.0112755	3.424	5.3994e-07
P50336	Protoporphyrinogen oxidase OS=Homo sapiens OX=9606 GN=PPOX PE=1 SV=1	PPOX	50.765	34.802	7.3	3	7	3	1.044	1.005	1.09	0.641	0.59	1.635	0.966	0.799	0.643	1.447	0.393	0.190856	0.814	0.47998	1.128	0.77674	0.443	0.00030071	1.769	0.033522	1.258	0.147861
P50395	Rab GDP dissociation inhibitor beta OS=Homo sapiens OX=9606 GN=GDI2 PE=1 SV=2	GDI2	50.663	323.31	45.4	21	68	15	1	0.888	1.235	0.811	2.004	0.526	0.676	1.367	1.784	0.962	3.392	1e-32	1.033	0.71436	1.827	1.62448e-12	0.843	0.00038205	0.499	1.11022e-16	0.65	2.1092e-12
P50402	Emerin OS=Homo sapiens OX=9606 GN=EMD PE=1 SV=1	EMD	28.994	6.3589	3.9	1	1	1
P50416	Carnitine O-palmitoyltransferase 1, liver isoform OS=Homo sapiens OX=9606 GN=CPT1A PE=1 SV=2	CPT1A	88.367	85.357	12.4	10	16	10	1.575	1.375	0.664	0.967	0.621	0.967	1.269	0.902	0.52	1.229	0.538	1.84949e-05	1.023	0.90268	0.523	7.2226e-10	0.787	1.6273e-06	2.536	2.3001e-09	1.524	1.2317e-09
P50452	Serpin B8 OS=Homo sapiens OX=9606 GN=SERPINB8 PE=1 SV=2	SERPINB8	42.766	20.528	7.5	3	3	3	1.413	1.869	0.719	1.283	0.687	0.788	0.895	1.092	0.789	0.745	1.001	0.92434	1.444	0.148023	0.803	0.00197789	1.722	0.06716	2.057	0.071024	1.712	0.00040077
P50453	Serpin B9 OS=Homo sapiens OX=9606 GN=SERPINB9 PE=1 SV=1	SERPINB9	42.403	117.94	27.1	8	10	8	1.185	1.22	1.295	1.08	0.872	0.799	0.958	0.983	1.168	0.832	1.462	3.6879e-06	1.338	0.00036095	1.352	0.000101775	1.298	3.0899e-07	1.359	0.00048274	1.241	0.00023895
P50454	Serpin H1 OS=Homo sapiens OX=9606 GN=SERPINH1 PE=1 SV=2	SERPINH1	46.44	43.72	10.3	4	4	4	1.193	1.224	0.624	0.936	0.69	1.338	1.168	0.976	0.874	1.212	0.653	0.025841	0.901	0.54294	0.534	0.066223	0.772	0.2253	1.729	0.064744	1.254	0.090623
P50502	Hsc70-interacting protein OS=Homo sapiens OX=9606 GN=ST13 PE=1 SV=2	ST13	41.331	277.9	27.4	10	45	10	0.716	0.889	1.45	1.088	1.456	0.548	0.907	1.116	2.011	0.823	3.67	1e-32	1.269	0.38866	1.599	1.94378e-12	1.322	2.1678e-08	0.492	1.11022e-16	0.797	4.523e-06
P50552	Vasodilator-stimulated phosphoprotein OS=Homo sapiens OX=9606 GN=VASP PE=1 SV=3	VASP	39.829	22.406	8.9	3	3	3	0.71	0.994	0.83	1.272	1.641	0.879	0.873	1.245	1.517	1.048	1.726		0.936	0.69172	0.951		1.214		0.433		0.798
P50570	Dynamin-2 OS=Homo sapiens OX=9606 GN=DNM2 PE=1 SV=2	DNM2	98.063	233.07	22.9	19	33	19	0.941	0.922	1.025	1.206	1.155	0.953	1.072	1.103	1.246	0.896	1.307	5.9291e-05	1.031	0.73666	0.956	0.61598	1.346	5.14622e-12	0.815	5.2667e-07	0.836	1.1849e-06
P50579	Methionine aminopeptidase 2 OS=Homo sapiens OX=9606 GN=METAP2 PE=1 SV=1	METAP2	52.891	42.873	12.3	4	8	4	1.13	0.922	1.228	0.682	1.302	0.919	0.704	1.198	1.046	1.282	1.138	0.7556	0.927	0.66806	1.744	0.0028358	0.532	0.042318	0.868	0.88234	0.77	0.54068
P50583	Bis(5'-nucleosyl)-tetraphosphatase [asymmetrical] OS=Homo sapiens OX=9606 GN=NUDT2 PE=1 SV=3	NUDT2	16.829	9.217	6.1	1	2	1	1.078	1.806	1.079	1.274	0.752	0.61	0.531	0.867	1.074	1.593	1.761	0.002197	1.45	0.081502	2.032	0.0197594	0.8	0.46558	1.434	0.144805	2.083	0.0134753
P50747	Biotin--protein ligase OS=Homo sapiens OX=9606 GN=HLCS PE=1 SV=1	HLCS	80.759	-2	1.2	1	1	1	1.689	0.862	0.5	0.954	0.304	2.437	0.827	0.612	0.226	1.181	0.093		0.789	0.67962	0.605		0.808		5.556		1.408
P50749	Ras association domain-containing protein 2 OS=Homo sapiens OX=9606 GN=RASSF2 PE=1 SV=1	RASSF2	37.79	31.329	14.4	4	5	4	1.093	1.62	0.655	1.21	0.904	0.83	0.931	1.046	0.724	1.095	0.872	0.12684	1.103	0.79804	0.704	0.022702	1.105	0.23984	1.209	0.054679	1.549	0.0121593
P50750	Cyclin-dependent kinase 9 OS=Homo sapiens OX=9606 GN=CDK9 PE=1 SV=3	CDK9	42.777	8.187	4.8	2	2	1
P50851	Lipopolysaccharide-responsive and beige-like anchor protein OS=Homo sapiens OX=9606 GN=LRBA PE=1 SV=4	LRBA	319.1	62.983	3	8	8	8	1.393	1.198	0.869	0.869	0.754	1.364	1.08	1.114	0.547	1.125	0.401	0.040585	0.897	0.47518	0.805	0.182602	0.772	0.67492	1.847	0.0148223	1.075	0.2313
P50895	Basal cell adhesion molecule OS=Homo sapiens OX=9606 GN=BCAM PE=1 SV=2	BCAM	67.404	125.13	17.7	9	11	9	0.914	1.002	0.758	1.225	1.644	0.381	0.584	0.664	1.187	2.572	3.115	5.6112e-05	0.87	0.80468	1.298	0.038202	0.476	9.7309e-05	0.556	8.6826e-07	1.509	2.1046e-05
P50914	60S ribosomal protein L14 OS=Homo sapiens OX=9606 GN=RPL14 PE=1 SV=4	RPL14	23.432	18.922	14	3	6	3	1.167	0.49	0.748	0.747	0.668	1.267	0.839	1.103	0.693	1.339	0.547	0.122284	0.737	0.141181	0.892	0.7181	0.558	0.139517	1.747	0.9882	0.444	0.080476
P50990	T-complex protein 1 subunit theta OS=Homo sapiens OX=9606 GN=CCT8 PE=1 SV=4	CCT8	59.62	323.31	56	29	94	29	0.767	0.953	0.982	1.056	1.379	1.09	1.09	1.201	1.097	0.975	1.006	0.245	0.847	0.085297	0.901	0.013605	1.083	1.57074e-05	0.556	1e-32	0.794	1.44329e-15
P50991	T-complex protein 1 subunit delta OS=Homo sapiens OX=9606 GN=CCT4 PE=1 SV=4	CCT4	57.924	323.31	40.8	21	53	21	0.728	0.896	1.039	1.028	1.415	1.042	1.09	1.137	1.247	0.968	1.197	4.2806e-05	0.874	0.23216	0.953	0.41866	1.062	0.87464	0.514	1.62448e-12	0.788	0.00129744
P50995	Annexin A11 OS=Homo sapiens OX=9606 GN=ANXA11 PE=1 SV=1	ANXA11	54.389	39.725	13.1	6	7	6	1.232	1.841	0.823	0.977	0.975	0.842	0.831	0.982	0.722	1.124	0.857	0.177216	1.177	0.53938	0.99	0.696	0.869	0.35262	1.264	0.007277	1.875	1.67557e-05
P51003	Poly(A) polymerase alpha OS=Homo sapiens OX=9606 GN=PAPOLA PE=1 SV=4	PAPOLA	82.842	12.776	3.1	2	2	2
P51114	Fragile X mental retardation syndrome-related protein 1 OS=Homo sapiens OX=9606 GN=FXR1 PE=1 SV=3	FXR1	69.72	58.956	11.3	6	7	5	1.204	1	1.009	0.867	0.687	1.334	0.97	1.177	0.604	1.34	0.453	0.0189033	0.85	0.38148	1.04	0.78482	0.647	0.080578	1.753	0.067424	0.85	0.47536
P51116	Fragile X mental retardation syndrome-related protein 2 OS=Homo sapiens OX=9606 GN=FXR2 PE=1 SV=2	FXR2	74.222	5.9533	2.7	2	2	1
P51148	Ras-related protein Rab-5C OS=Homo sapiens OX=9606 GN=RAB5C PE=1 SV=2	RAB5C	23.482	40.547	38.9	7	10	4	0.841	0.71	1.255	0.955	1.358	1.162	1.118	1.085	1.407	0.843	1.211	0.20204	0.928	0.54092	1.123	0.41694	1.133	0.67526	0.619	0.169102	0.654	0.088459
P51149	Ras-related protein Rab-7a OS=Homo sapiens OX=9606 GN=RAB7A PE=1 SV=1	RAB7A	23.489	66.3	38.2	7	10	7	0.97	1.139	0.934	1.194	0.999	1.02	1.241	0.744	1.25	0.882	1.225	0.185297	1.123	0.2616	0.753	0.36056	1.354	0.024304	0.971	0.70644	1.531	0.029297
P51151	Ras-related protein Rab-9A OS=Homo sapiens OX=9606 GN=RAB9A PE=1 SV=1	RAB9A	22.837	19.177	11.9	2	4	2	1.005	1.338	0.974	0.657	0.912	1.292	0.938	1.078	0.744	1.382	0.576		0.842	0.24258	1.038		0.475		1.102		1.241
P51153	Ras-related protein Rab-13 OS=Homo sapiens OX=9606 GN=RAB13 PE=1 SV=1	RAB13	22.774	17.422	21.2	4	7	2	1.227	2.448	0.594	0.98	0.745	0.722	0.945	0.956	0.601	1.009	0.832		1.337	0.60392	0.629		0.971		1.647		2.561
P51159	Ras-related protein Rab-27A OS=Homo sapiens OX=9606 GN=RAB27A PE=1 SV=3	RAB27A	24.868	49.958	24.4	5	7	5	1.18	1.869	0.583	1.24	0.848	0.866	0.986	1.032	0.658	0.999	0.76	0.065819	1.169	0.7719	0.591	0.00020113	1.241	0.0117642	1.392	0.00174036	1.811	2.1319e-05
P51397	Death-associated protein 1 OS=Homo sapiens OX=9606 GN=DAP PE=1 SV=3	DAP	11.164	11.319	15.7	2	2	2	1.355	1.17	1.274	1.071	1.036	0.924	1.005	0.863	0.941	0.832	1.018		1.247	0.022978	1.268		1.287		1.308		1.356
P51398	28S ribosomal protein S29, mitochondrial OS=Homo sapiens OX=9606 GN=DAP3 PE=1 SV=1	DAP3	45.566	59.151	17.8	6	7	6	0.887	0.794	1.337	0.713	0.552	1.815	1.029	0.724	0.477	1.39	0.263	0.00027773	0.764	0.41212	1.299	0.83408	0.513	0.000158429	1.607	0.35716	1.097	0.39234
P51452	Dual specificity protein phosphatase 3 OS=Homo sapiens OX=9606 GN=DUSP3 PE=1 SV=1	DUSP3	20.478	15.826	13	2	2	2	1.057	1.229	1.223	0.931	0.975	0.847	1.07	1.154	0.904	1.098	1.067	0.7004	1.039	0.6867	1.143	0.115756	0.848	0.33182	1.084	0.37368	1.065	0.50338
P51532	Transcription activator BRG1 OS=Homo sapiens OX=9606 GN=SMARCA4 PE=1 SV=2	SMARCA4	184.64	12.766	1.2	2	2	1	0.848	0.969	0.736	0.757	0.804	2.077	1.474	0.731	0.674	0.859	0.325		0.67	0.20226	0.499		0.881		1.055		1.326
P51553	Isocitrate dehydrogenase [NAD] subunit gamma, mitochondrial OS=Homo sapiens OX=9606 GN=IDH3G PE=1 SV=1	IDH3G	42.794	29.703	10.9	4	6	4	0.883	0.767	0.998	0.764	1.043	1.354	1.942	0.732	0.558	1.068	0.412	0.031924	0.647	0.06552	0.514	0.0048834	0.715	0.025179	0.847	0.3029	1.048	0.45614
P51570	Galactokinase OS=Homo sapiens OX=9606 GN=GALK1 PE=1 SV=1	GALK1	42.272	26.06	9.9	4	5	4	1.005	0.936	1.207	0.91	0.963	1.347	0.988	0.961	1.173	1.089	0.871	0.20088	0.978	0.82004	1.222	0.0036246	0.836	0.34594	1.044	0.3799	0.974	0.35446
P51571	Translocon-associated protein subunit delta OS=Homo sapiens OX=9606 GN=SSR4 PE=1 SV=1	SSR4	18.998	44.14	25.4	4	10	4	1.254	0.943	0.983	0.676	0.421	1.816	1.165	0.698	0.327	1.219	0.18	1.78702e-05	0.786	0.5472	0.844	0.164476	0.555	0.00022414	2.979	0.00132192	1.351	0.046483
P51572	B-cell receptor-associated protein 31 OS=Homo sapiens OX=9606 GN=BCAP31 PE=1 SV=3	BCAP31	27.991	106.54	38.6	13	27	13	1.045	1.413	0.721	1.169	0.593	1.866	0.847	0.637	0.435	1.166	0.233	1e-32	0.936	0.86964	0.851	0.000140438	1.003	0.114882	1.762	1.7922e-10	2.218	1e-32
P51580	Thiopurine S-methyltransferase OS=Homo sapiens OX=9606 GN=TPMT PE=1 SV=1	TPMT	28.18	34.032	14.7	3	5	3	0.781	0.833	1.317	0.94	1.021	1.029	0.979	1.387	1.601	0.853	1.556	0.0115422	1.039	0.9439	1.345	0.125464	1.102	0.46862	0.765	0.3221	0.601	0.027182
P51608	Methyl-CpG-binding protein 2 OS=Homo sapiens OX=9606 GN=MECP2 PE=1 SV=1	MECP2	52.44	6.7492	2.1	1	1	1
P51610	Host cell factor 1 OS=Homo sapiens OX=9606 GN=HCFC1 PE=1 SV=2	HCFC1	208.73	70.574	4.6	9	10	9	1.163	1.146	1.116	0.818	0.734	1.426	1.069	0.868	0.704	1.04	0.494	0.0125183	0.963	0.8333	1.044	0.73882	0.787	0.087656	1.584	0.00199703	1.32	0.114658
P51648	Fatty aldehyde dehydrogenase OS=Homo sapiens OX=9606 GN=ALDH3A2 PE=1 SV=1	ALDH3A2	54.847	60.735	14.6	6	7	6	1.083	1.385	0.791	0.962	0.799	1.243	1.003	1.005	0.686	1.222	0.552	0.034622	0.931	0.55906	0.789	0.047962	0.787	0.0149953	1.355	0.15276	1.378	0.007383
P51649	Succinate-semialdehyde dehydrogenase, mitochondrial OS=Homo sapiens OX=9606 GN=ALDH5A1 PE=1 SV=2	ALDH5A1	57.214	38.416	10.1	5	5	5	1.472	0.841	0.731	0.675	0.921	1.003	2.011	0.662	0.617	1.187	0.615	0.023398	0.75	0.28962	0.364	0.0173824	0.569	0.0173201	1.598	0.043418	1.27	0.39418
P51659	Peroxisomal multifunctional enzyme type 2 OS=Homo sapiens OX=9606 GN=HSD17B4 PE=1 SV=3	HSD17B4	79.685	61.72	11.5	7	7	7	1.099	0.995	0.806	1.12	1.113	1.481	1.069	0.698	0.813	1.163	0.549	0.140276	0.875	0.43632	0.754	0.154116	0.963	0.86372	0.987	0.96166	1.426	0.17058
P51665	26S proteasome non-ATPase regulatory subunit 7 OS=Homo sapiens OX=9606 GN=PSMD7 PE=1 SV=2	PSMD7	37.025	46.865	15.7	6	12	6	0.912	1.081	0.93	1.134	1.25	1.048	1.131	1.054	1.144	0.906	1.092	0.2829	0.965	0.64208	0.822	6.0385e-05	1.252	0.035302	0.73	0.00096292	1.026	0.59178
P51692	Signal transducer and activator of transcription 5B OS=Homo sapiens OX=9606 GN=STAT5B PE=1 SV=2	STAT5B	89.865	181.03	20.3	16	25	3	1.114	1.13	0.954	1.09	1.079	1.255	0.931	1.077	0.97	0.924	0.773	0.96244	0.998	0.97232	1.025	0.4145	1.18	0.140855	1.032	0.77932	1.049	0.63368
P51784	Ubiquitin carboxyl-terminal hydrolase 11 OS=Homo sapiens OX=9606 GN=USP11 PE=1 SV=3	USP11	109.82	25.424	5.7	5	6	4	0.842	0.458	1.367	0.932	1.101	0.681	1.064	1.464	2.401	0.885	3.526		1.155	0.93242	1.285		1.053		0.765		0.313
P51798	H(+)/Cl(-) exchange transporter 7 OS=Homo sapiens OX=9606 GN=CLCN7 PE=1 SV=2	CLCN7	88.678	6.1253	1.2	1	1	1
P51808	Dynein light chain Tctex-type 3 OS=Homo sapiens OX=9606 GN=DYNLT3 PE=1 SV=1	DYNLT3	13.062	13.2	14.7	1	1	1
P51811	Membrane transport protein XK OS=Homo sapiens OX=9606 GN=XK PE=1 SV=5	XK	50.902	13.745	5.6	2	3	2	0.812	0.741	1.195	1.434	1.76	0.597	1.071	0.853	1.726	1.021	2.891	0.039323	1.114	0.63106	1.116	0.54998	1.405	0.27916	0.461	0.116843	0.869	0.9336
P51812	Ribosomal protein S6 kinase alpha-3 OS=Homo sapiens OX=9606 GN=RPS6KA3 PE=1 SV=1	RPS6KA3	83.735	134.38	23.8	15	22	10	1.017	1.249	0.994	1.138	1.142	0.861	1.006	1.008	1.149	1.067	1.334	0.011019	1.091	0.1997	0.988	0.60118	1.067	0.6408	0.891	0.97528	1.239	0.018057
P51813	Cytoplasmic tyrosine-protein kinase BMX OS=Homo sapiens OX=9606 GN=BMX PE=1 SV=1	BMX	78.01	14.071	3.7	2	2	2	1.132	1.477	0.707	1.325	0.764	0.928	1	0.95	1.107	1.084	1.193		1.216	0.24722	0.707		1.222		1.482		1.555
P51858	Hepatoma-derived growth factor OS=Homo sapiens OX=9606 GN=HDGF PE=1 SV=1	HDGF	26.788	137.93	45	12	28	11	0.859	0.791	1.346	1.025	0.678	1.721	0.842	0.871	1.021	0.925	0.593	1.4974e-08	1.001	0.83918	1.599	2.9431e-06	1.108	0.70134	1.267	0.094658	0.908	0.062797
P51970	NADH dehydrogenase [ubiquinone] 1 alpha subcomplex subunit 8 OS=Homo sapiens OX=9606 GN=NDUFA8 PE=1 SV=3	NDUFA8	20.105	32.719	37.2	5	8	5	0.948	1.022	0.846	1.053	0.637	1.356	1.266	0.931	0.459	1.248	0.338	0.0099352	0.796	0.29448	0.668	0.0054995	0.844	0.176402	1.488	0.126497	1.098	0.22628
P51991	Heterogeneous nuclear ribonucleoprotein A3 OS=Homo sapiens OX=9606 GN=HNRNPA3 PE=1 SV=2	HNRNPA3	39.594	130.61	23.5	6	14	6	0.929	1.549	1.035	1.007	0.607	1.502	0.975	0.717	0.532	0.904	0.354	2.8532e-07	1.074	0.78464	1.062	0.70944	1.114	0.5807	1.53	0.28086	2.16	2.7159e-07
P52209	6-phosphogluconate dehydrogenase, decarboxylating OS=Homo sapiens OX=9606 GN=PGD PE=1 SV=3	PGD	53.139	309.78	33.7	16	42	16	0.877	1.053	1.071	1.067	1.418	0.786	0.94	1.208	1.298	1.087	1.651	1.62448e-12	0.987	0.99442	1.139	0.0103448	0.982	0.27748	0.618	1e-32	0.872	0.00196178
P52272	Heterogeneous nuclear ribonucleoprotein M OS=Homo sapiens OX=9606 GN=HNRNPM PE=1 SV=3	HNRNPM	77.515	73.913	13.4	9	12	9	1.011	1.055	1.189	0.813	0.734	1.525	1.32	0.8	0.524	0.979	0.344	1.69361e-05	0.857	0.47192	0.901	0.20976	0.83	0.52564	1.377	0.037896	1.319	0.031342
P52294	Importin subunit alpha-5 OS=Homo sapiens OX=9606 GN=KPNA1 PE=1 SV=3	KPNA1	60.221	28.857	10.8	5	7	4	1.073	1.065	0.816	1.012	0.911	1.443	0.962	1.115	1.133	0.847	0.785		0.966	0.84582	0.848		1.195		1.178		0.955
P52298	Nuclear cap-binding protein subunit 2 OS=Homo sapiens OX=9606 GN=NCBP2 PE=1 SV=1	NCBP2	18.001	15.819	7.1	1	1	1	1.01	0.797	1.395	0.896	0.75	1.655	1.164	0.809	0.747	0.899	0.451		0.918	0.72146	1.198		0.997		1.347		0.985
P52306	Rap1 GTPase-GDP dissociation stimulator 1 OS=Homo sapiens OX=9606 GN=RAP1GDS1 PE=1 SV=3	RAP1GDS1	66.316	33.262	7.7	4	4	4	1.358	1.426	1.065	1.012	0.729	1.08	0.836	0.958	0.588	1.182	0.544	0.070178	1.139	0.59456	1.274	0.057582	0.856	0.39168	1.863	0.0190803	1.489	0.040503
P52434	DNA-directed RNA polymerases I, II, and III subunit RPABC3 OS=Homo sapiens OX=9606 GN=POLR2H PE=1 SV=4	POLR2H	17.143	17.382	16.7	2	2	2
P52565	Rho GDP-dissociation inhibitor 1 OS=Homo sapiens OX=9606 GN=ARHGDIA PE=1 SV=3	ARHGDIA	23.207	55.165	22.5	5	7	5	0.932	0.804	1.564	0.633	1.165	1.128	0.712	1.243	1.591	0.881	1.41	0.0172382	1.077	0.89654	2.197	2.1975e-07	0.719	0.0089806	0.8	0.108704	0.647	0.022497
P52566	Rho GDP-dissociation inhibitor 2 OS=Homo sapiens OX=9606 GN=ARHGDIB PE=1 SV=3	ARHGDIB	22.988	60.542	17.4	3	10	3	1.236	1.313	1.04	0.856	1.072	0.719	0.806	1.397	1.038	1.046	1.444	9.4096e-08	1.088	0.49016	1.29	4.8675e-06	0.818	0.00090131	1.153	0.32752	0.94	0.0106236
P52594	Arf-GAP domain and FG repeat-containing protein 1 OS=Homo sapiens OX=9606 GN=AGFG1 PE=1 SV=2	AGFG1	58.259	26.061	7.5	4	5	4	0.84	0.929	1.077	1.007	1.05	1.006	1	0.978	1.479	0.864	1.47	0.25264	1.089	0.52404	1.077	0.5471	1.166	0.25682	0.8	0.74524	0.95	0.87384
P52597	Heterogeneous nuclear ribonucleoprotein F OS=Homo sapiens OX=9606 GN=HNRNPF PE=1 SV=3	HNRNPF	45.671	18.325	8.2	3	5	2	0.978	1.311	1.017	0.956	0.906	1.206	0.964	1.146	0.669	1.135	0.555	0.121605	0.92	0.43514	1.055	0.57836	0.842	0.59582	1.079	0.66252	1.144	0.37656
P52630	Signal transducer and activator of transcription 2 OS=Homo sapiens OX=9606 GN=STAT2 PE=1 SV=1	STAT2	97.915	9.5044	1.5	1	2	1	1.076	0.656	1.524	0.733	1.055	1.276	1.251	0.951	0.449	1.292	0.352		0.762	0.181864	1.218		0.567		1.02		0.69
P52655	Transcription initiation factor IIA subunit 1 OS=Homo sapiens OX=9606 GN=GTF2A1 PE=1 SV=1	GTF2A1	41.513	6.3015	2.9	1	1	1
P52701	DNA mismatch repair protein Msh6 OS=Homo sapiens OX=9606 GN=MSH6 PE=1 SV=2	MSH6	152.78	40.207	4.2	6	6	6	1.156	1.327	0.865	0.913	0.891	1.062	0.942	1.021	0.585	1.359	0.551	0.092419	0.919	0.50126	0.918	0.67692	0.672	0.0156967	1.297	0.044984	1.3	0.11586
P52788	Spermine synthase OS=Homo sapiens OX=9606 GN=SMS PE=1 SV=2	SMS	41.268	26.207	10.1	4	5	4	0.992	1.105	0.814	0.851	1.272	1.249	0.987	1.105	1.074	1.113	0.86		0.845	0.055217	0.825		0.765		0.78		1
P52789	Hexokinase-2 OS=Homo sapiens OX=9606 GN=HK2 PE=1 SV=2	HK2	102.38	11.818	4.1	4	6	2	1.086	1.521	0.603	0.997	0.762	1.324	1.081	1.02	0.556	1.185	0.42	0.043484	0.887	0.43206	0.558	0.03046	0.841	0.23714	1.425	0.23346	1.491	0.025502
P52790	Hexokinase-3 OS=Homo sapiens OX=9606 GN=HK3 PE=1 SV=2	HK3	99.024	183.96	15.5	11	20	10	1.069	1.489	0.779	1.352	0.898	0.876	1.021	0.977	0.879	1.095	1.003	0.3205	1.144	0.42974	0.763	0.143864	1.235	0.162095	1.19	0.00026426	1.524	3.6263e-05
P52815	39S ribosomal protein L12, mitochondrial OS=Homo sapiens OX=9606 GN=MRPL12 PE=1 SV=2	MRPL12	21.348	19.096	11.6	3	3	3
P52888	Thimet oligopeptidase OS=Homo sapiens OX=9606 GN=THOP1 PE=1 SV=2	THOP1	78.839	80.247	16.7	11	19	11	1.12	1.13	1.195	0.876	1.567	0.692	0.651	1.25	1.268	1.199	1.832	1.0372e-09	1.043	0.63032	1.836	1.603e-11	0.731	5.315e-09	0.715	4.5065e-07	0.904	0.086096
P52907	F-actin-capping protein subunit alpha-1 OS=Homo sapiens OX=9606 GN=CAPZA1 PE=1 SV=3	CAPZA1	32.922	203.1	44.4	8	25	7	0.909	1.511	1.009	1.137	1.047	0.726	0.968	1.139	1.303	0.858	1.795	2.4277e-08	1.239	0.117897	1.042	0.9514	1.325	0.0082965	0.868	0.107879	1.327	0.058942
P52948	Nuclear pore complex protein Nup98-Nup96 OS=Homo sapiens OX=9606 GN=NUP98 PE=1 SV=4	NUP98	197.58	23.114	1.8	3	3	3	1.357	1.076	0.838	0.773	0.798	1.133	1.401	0.999	0.689	1.154	0.608	0.047403	0.863	0.32336	0.598	0.080803	0.67	0.0073629	1.701	0.071642	1.077	0.39752
P53004	Biliverdin reductase A OS=Homo sapiens OX=9606 GN=BLVRA PE=1 SV=2	BLVRA	33.428	119.46	25.7	9	21	9	0.967	0.77	1.406	0.77	2.148	0.548	0.666	1.344	1.832	0.948	3.343	1e-32	1.016	0.80048	2.111	4.44089e-16	0.812	0.00174447	0.45	1e-32	0.573	3.19744e-14
P53007	Tricarboxylate transport protein, mitochondrial OS=Homo sapiens OX=9606 GN=SLC25A1 PE=1 SV=2	SLC25A1	34.012	49.488	18.6	6	8	6	0.896	0.789	0.959	1.14	0.552	2.117	1.146	0.709	0.474	1.127	0.224	0.0012965	0.753	0.45752	0.837	0.115923	1.012	0.87992	1.623	0.020202	1.113	0.137583
P53041	Serine/threonine-protein phosphatase 5 OS=Homo sapiens OX=9606 GN=PPP5C PE=1 SV=1	PPP5C	56.878	89.442	16.4	8	12	8	1.199	1.035	0.992	0.824	1.326	0.986	0.817	1.414	0.94	1.056	0.953	0.65718	0.891	0.40588	1.214	0.147404	0.78	0.048721	0.904	0.069964	0.732	0.00038156
P53365	Arfaptin-2 OS=Homo sapiens OX=9606 GN=ARFIP2 PE=1 SV=1	ARFIP2	37.855	7.6212	3.2	1	1	1
P53367	Arfaptin-1 OS=Homo sapiens OX=9606 GN=ARFIP1 PE=1 SV=2	ARFIP1	41.738	19.153	5.9	2	2	2	1.117	1.126	1.182	0.74	1.387	0.716	0.944	1.314	1.02	1.189	1.425		0.934	0.72874	1.252		0.622		0.805		0.857
P53384	Cytosolic Fe-S cluster assembly factor NUBP1 OS=Homo sapiens OX=9606 GN=NUBP1 PE=1 SV=2	NUBP1	34.534	7.531	3.4	1	2	1	1.296	1.251	1.252	0.812	0.259	1.542	0.64	1.22	0.272	1.332	0.176		0.978	0.97346	1.956		0.61		5.004		1.025
P53396	ATP-citrate synthase OS=Homo sapiens OX=9606 GN=ACLY PE=1 SV=3	ACLY	120.84	323.31	36.1	36	116	36	0.839	0.857	1.032	1.08	1.799	0.672	1.015	1.242	1.242	1.053	1.848	1.62459e-12	0.874	0.60118	1.017	0.170658	1.026	0.52054	0.466	1e-32	0.69	1.62437e-12
P53582	Methionine aminopeptidase 1 OS=Homo sapiens OX=9606 GN=METAP1 PE=1 SV=2	METAP1	43.215	34.24	9.3	3	4	3	1.317	1.287	1.029	0.905	0.86	1.414	0.885	0.839	0.67	1.067	0.474	0.117416	1.028	0.90926	1.163	0.0112588	0.848	0.31792	1.531	0.034676	1.534	0.0030834
P53597	Succinate--CoA ligase [ADP/GDP-forming] subunit alpha, mitochondrial OS=Homo sapiens OX=9606 GN=SUCLG1 PE=1 SV=4	SUCLG1	36.249	45.699	18.5	5	6	5	1.063	0.854	0.843	0.979	0.746	1.628	1.546	0.661	0.508	1.328	0.312	4.3711e-06	0.719	0.2357	0.545	0.00035899	0.737	0.0042247	1.425	0.0153017	1.292	0.60584
P53602	Diphosphomevalonate decarboxylase OS=Homo sapiens OX=9606 GN=MVD PE=1 SV=1	MVD	43.404	35.416	9.2	3	3	3	0.828	0.768	1.319	0.678	2.024	0.436	0.643	1.576	1.462	1.286	3.353	0.0178608	0.847	0.84694	2.051	0.194538	0.527	0.0087551	0.409	0.051639	0.487	0.009237
P53609	Geranylgeranyl transferase type-1 subunit beta OS=Homo sapiens OX=9606 GN=PGGT1B PE=1 SV=2	PGGT1B	42.368	19.253	8	3	3	3	1.069	1.306	0.929	0.891	1.003	1.081	1.116	1.022	0.98	1.039	0.907	0.42944	0.984	0.73822	0.832	0.53922	0.858	0.24574	1.066	0.52396	1.278	0.143879
P53611	Geranylgeranyl transferase type-2 subunit beta OS=Homo sapiens OX=9606 GN=RABGGTB PE=1 SV=2	RABGGTB	36.924	36.301	12.1	4	6	4	1.045	0.974	0.799	1.122	1.341	1.155	0.977	0.997	1.094	0.98	0.947	0.25724	0.924	0.39314	0.818	0.00242	1.145	0.030719	0.779	0.00049585	0.977	0.30212
P53618	Coatomer subunit beta OS=Homo sapiens OX=9606 GN=COPB1 PE=1 SV=3	COPB1	107.14	148.4	17.6	18	26	18	1.301	0.851	0.985	0.881	0.735	1.681	1.03	0.847	0.575	1.229	0.342	7.9657e-08	0.832	0.39782	0.956	0.12778	0.717	0.0053231	1.77	3.627e-05	1.005	0.33982
P53621	Coatomer subunit alpha OS=Homo sapiens OX=9606 GN=COPA PE=1 SV=2	COPA	138.34	256.36	25.7	29	43	29	1.241	0.913	1	0.925	0.671	1.675	1.01	0.889	0.495	1.194	0.296	1.62492e-12	0.841	0.45768	0.99	0.68162	0.775	9.6347e-07	1.849	7.19413e-12	1.027	0.57318
P53680	AP-2 complex subunit sigma OS=Homo sapiens OX=9606 GN=AP2S1 PE=1 SV=2	AP2S1	17.018	11.363	12	2	4	2	0.784	0.81	1.005	1.299	0.869	1.591	0.899	0.921	1.401	0.916	0.881	0.8419	1.02	0.9042	1.118	0.182736	1.418	0.37238	0.902	0.71374	0.879	0.34146
P53701	Cytochrome c-type heme lyase OS=Homo sapiens OX=9606 GN=HCCS PE=1 SV=1	HCCS	30.601	12.589	7.1	2	2	2	1.196	1.242	1.235	0.689	0.581	1.298	0.889	1.114	0.323	1.501	0.249		0.87	0.53368	1.389		0.459		2.059		1.115
P53985	Monocarboxylate transporter 1 OS=Homo sapiens OX=9606 GN=SLC16A1 PE=1 SV=3	SLC16A1	53.944	21.95	4	2	3	2	0.583	0.541	1.319	0.898	0.876	1.736	1.006	0.659	1.922	1.158	1.107	0.43402	0.968	0.7455	1.311	0.35858	0.775	0.159002	0.666	0.24632	0.821	0.45096
P53990	IST1 homolog OS=Homo sapiens OX=9606 GN=IST1 PE=1 SV=1	IST1	39.75	54.019	14.3	7	9	7	0.904	1.04	1.287	0.969	1.227	0.792	0.84	1.173	1.551	0.849	1.958	0.00025836	1.178	0.26912	1.532	0.0080006	1.141	0.35364	0.737	0.0089014	0.887	0.151517
P53992	Protein transport protein Sec24C OS=Homo sapiens OX=9606 GN=SEC24C PE=1 SV=3	SEC24C	118.32	107.09	11.4	10	10	10	1.286	1.013	0.986	0.77	0.563	1.488	1.087	0.846	0.667	1.367	0.448	0.00164432	0.882	0.6677	0.907	0.047001	0.563	5.8828e-05	2.284	0.0124194	1.197	0.030203
P53999	Activated RNA polymerase II transcriptional coactivator p15 OS=Homo sapiens OX=9606 GN=SUB1 PE=1 SV=3	SUB1	14.395	67.612	40.2	4	17	4	0.533	0.644	0.98	0.74	0.404	3.343	1.024	0.506	0.379	0.803	0.113	1.2271e-06	0.539	0.40052	0.957	0.52294	0.922	0.17366	1.319	0.2584	1.273	0.54578
P54105	Methylosome subunit pICln OS=Homo sapiens OX=9606 GN=CLNS1A PE=1 SV=1	CLNS1A	26.215	31.066	11	2	4	2	1.071	0.953	1.103	0.909	1.213	1.039	0.874	1.019	1.6	1.038	1.54	0.025503	1.087	0.5611	1.262	0.136344	0.876	0.173495	0.883	0.2051	0.935	0.50996
P54108	Cysteine-rich secretory protein 3 OS=Homo sapiens OX=9606 GN=CRISP3 PE=1 SV=1	CRISP3	27.63	10.744	3.7	1	2	1	1.836	1.948	0.628	1.105	0.82	0.606	0.912	1.101	0.519	0.758	0.856		1.438	0.41874	0.689		1.458		2.239		1.769
P54136	Arginine--tRNA ligase, cytoplasmic OS=Homo sapiens OX=9606 GN=RARS PE=1 SV=2	RARS	75.378	186.97	27.1	16	27	16	1.289	1.222	0.749	0.985	0.759	1.342	1.081	0.957	0.77	1.07	0.574	6.7112e-08	0.963	0.75968	0.693	7.9985e-08	0.921	0.0060218	1.698	2.6815e-09	1.277	1.7289e-08
P54252	Ataxin-3 OS=Homo sapiens OX=9606 GN=ATXN3 PE=1 SV=5	ATXN3	41.25	7.2459	2.8	1	1	1	1.06	0.797	1.158	0.83	1.213	1.106	1.058	0.857	1.834	0.955	1.658		1.094	0.76576	1.095		0.869		0.874		0.93
P54577	Tyrosine--tRNA ligase, cytoplasmic OS=Homo sapiens OX=9606 GN=YARS PE=1 SV=4	YARS	59.143	127.51	33	16	23	16	1.113	0.803	1.018	0.954	1.034	1.236	1.006	1.165	1.003	1.092	0.811	0.0043421	0.884	0.092201	1.012	0.102884	0.874	0.0012614	1.076	0.98956	0.689	2.6465e-07
P54578	Ubiquitin carboxyl-terminal hydrolase 14 OS=Homo sapiens OX=9606 GN=USP14 PE=1 SV=3	USP14	56.068	323.31	46	25	63	25	0.887	0.794	1.387	0.911	1.543	0.653	0.875	1.095	1.866	0.982	2.858	1e-32	1.135	0.6147	1.585	1e-32	0.928	0.0069837	0.575	1e-32	0.725	4.3493e-11
P54619	5'-AMP-activated protein kinase subunit gamma-1 OS=Homo sapiens OX=9606 GN=PRKAG1 PE=1 SV=1	PRKAG1	37.579	72.571	20.8	6	8	6	1.174	1.246	0.751	0.88	0.878	1.417	0.88	1.297	0.77	0.993	0.543	0.00059799	0.882	0.40482	0.853	0.49812	0.886	0.065458	1.337	0.044162	0.961	0.44328
P54652	Heat shock-related 70 kDa protein 2 OS=Homo sapiens OX=9606 GN=HSPA2 PE=1 SV=1	HSPA2	70.02	20.992	18	11	27	2	1.1	0.986	1.158	0.901	1.464	0.835	1.024	0.992	1.473	0.945	1.764	0.21438	1.068	0.5918	1.131	0.171	0.953	0.5035	0.751	0.0170623	0.994	0.78664
P54687	Branched-chain-amino-acid aminotransferase, cytosolic OS=Homo sapiens OX=9606 GN=BCAT1 PE=1 SV=3	BCAT1	42.966	6.054	2.8	1	1	1
P54725	UV excision repair protein RAD23 homolog A OS=Homo sapiens OX=9606 GN=RAD23A PE=1 SV=1	RAD23A	39.609	187.7	20.1	7	16	5	0.802	0.524	1.687	0.652	1.074	1.274	0.744	0.83	2.481	0.825	1.947	1.0614e-07	1.295	0.75748	2.267	1.58719e-05	0.79	0.055242	0.747	0.042945	0.631	0.091704
P54727	UV excision repair protein RAD23 homolog B OS=Homo sapiens OX=9606 GN=RAD23B PE=1 SV=1	RAD23B	43.171	137.48	25.7	10	20	8	0.776	0.468	1.709	0.847	0.757	1.37	0.738	0.783	1.964	0.874	1.434	5.5995e-05	1.275	0.65152	2.316	1.9483e-11	0.969	0.77874	1.025	0.71922	0.598	0.0041645
P54803	Galactocerebrosidase OS=Homo sapiens OX=9606 GN=GALC PE=1 SV=3	GALC	77.063	10.781	2.6	2	2	2
P54819	Adenylate kinase 2, mitochondrial OS=Homo sapiens OX=9606 GN=AK2 PE=1 SV=2	AK2	26.477	86.175	40.6	8	13	8	1.107	1.356	1.047	0.932	0.933	1.116	0.934	1.063	0.705	1.17	0.632	0.00024125	0.987	0.7942	1.121	0.100743	0.797	0.07754	1.186	0.0035553	1.276	5.9429e-05
P54886	Delta-1-pyrroline-5-carboxylate synthase OS=Homo sapiens OX=9606 GN=ALDH18A1 PE=1 SV=2	ALDH18A1	87.301	123.24	19.1	12	18	12	0.948	0.752	1.119	0.946	0.816	1.305	1.448	0.79	0.782	1.334	0.599	0.0034628	0.799	0.21166	0.773	0.072964	0.709	0.022682	1.162	0.26158	0.952	0.26108
P54920	Alpha-soluble NSF attachment protein OS=Homo sapiens OX=9606 GN=NAPA PE=1 SV=3	NAPA	33.232	323.31	56.9	15	35	13	0.919	0.923	1.283	1.054	1.633	0.721	0.935	0.981	1.733	0.869	2.404	1e-32	1.15	0.43178	1.372	2.17604e-13	1.213	2.0556e-07	0.563	1.66089e-12	0.941	0.27686
P54922	[Protein ADP-ribosylarginine] hydrolase OS=Homo sapiens OX=9606 GN=ADPRH PE=1 SV=1	ADPRH	39.506	25.586	12	3	4	3	1.329	1.19	1.735	1.027	0.554	0.922	0.97	0.887	0.771	0.868	0.836	0.52154	1.441	0.072763	1.789	0.049083	1.183	0.38324	2.399	0.007098	1.342	0.12324
P55008	Allograft inflammatory factor 1 OS=Homo sapiens OX=9606 GN=AIF1 PE=1 SV=1	AIF1	16.703	6.6675	6.1	1	1	1
P55010	Eukaryotic translation initiation factor 5 OS=Homo sapiens OX=9606 GN=EIF5 PE=1 SV=2	EIF5	49.222	207.59	27.1	13	28	13	0.855	0.787	1.3	0.847	1.184	1.302	0.981	1.005	1.43	0.907	1.098	0.02804	0.97	0.71706	1.325	1.0412e-09	0.934	0.25018	0.722	1.7099e-08	0.783	2.175e-06
P55036	26S proteasome non-ATPase regulatory subunit 4 OS=Homo sapiens OX=9606 GN=PSMD4 PE=1 SV=1	PSMD4	40.736	145.19	23.1	6	10	5	0.654	0.576	1.517	0.911	0.954	1.41	0.98	0.731	2.286	0.773	1.621	0.0093391	1.226	0.74984	1.548	0.0028192	1.179	0.78394	0.686	0.23384	0.788	0.40998
P55039	Developmentally-regulated GTP-binding protein 2 OS=Homo sapiens OX=9606 GN=DRG2 PE=1 SV=1	DRG2	40.746	24.643	11.5	4	4	4	1.255	1.187	0.943	0.842	1.054	1.529	0.883	0.959	0.873	0.926	0.571	0.02112	0.953	0.76036	1.068	0.54912	0.909	0.87084	1.191	0.67256	1.238	0.065521
P55060	Exportin-2 OS=Homo sapiens OX=9606 GN=CSE1L PE=1 SV=3	CSE1L	110.42	142.24	17	14	18	14	0.976	0.971	1.161	1.083	0.971	0.975	0.869	0.865	1.319	1.012	1.353	0.00027723	1.174	0.045217	1.336	0.00160049	1.07	0.57912	1.005	0.57276	1.123	0.021885
P55072	Transitional endoplasmic reticulum ATPase OS=Homo sapiens OX=9606 GN=VCP PE=1 SV=4	VCP	89.321	323.31	37.7	30	98	30	0.867	1.001	1.085	1.215	1.041	1.004	0.958	1.062	1.526	0.902	1.52	1.62437e-12	1.146	0.29586	1.133	2.4036e-05	1.347	1.62459e-12	0.833	2.3194e-07	0.943	0.102357
P55084	Trifunctional enzyme subunit beta, mitochondrial OS=Homo sapiens OX=9606 GN=HADHB PE=1 SV=3	HADHB	51.294	140.7	25.3	12	30	12	0.945	0.88	1.231	0.843	0.619	1.692	1.403	0.743	0.448	1.116	0.265	1e-32	0.78	0.38886	0.877	0.00082197	0.755	2.8423e-09	1.527	2.8237e-08	1.184	4.826e-06
P55145	Mesencephalic astrocyte-derived neurotrophic factor OS=Homo sapiens OX=9606 GN=MANF PE=1 SV=3	MANF	20.7	68.089	26.4	5	6	5	1.542	0.685	0.659	0.744	0.606	2.466	0.713	0.893	0.55	0.873	0.223	1.8133e-08	0.753	0.5002	0.924	0.27906	0.852	0.26046	2.545	2.4967e-05	0.767	0.0156
P55160	Nck-associated protein 1-like OS=Homo sapiens OX=9606 GN=NCKAP1L PE=1 SV=3	NCKAP1L	128.15	50.44	5.6	6	6	6	1.154	1.357	0.779	1.281	0.803	1.165	1.115	1.042	0.584	0.952	0.501	0.00171649	1.015	0.8894	0.699	0.0028975	1.346	0.0179221	1.437	0.027076	1.302	0.089625
P55209	Nucleosome assembly protein 1-like 1 OS=Homo sapiens OX=9606 GN=NAP1L1 PE=1 SV=1	NAP1L1	45.374	60.133	13.6	5	8	4	0.775	0.793	1.28	1.145	1.353	0.921	0.989	1.067	1.928	0.742	2.093	0.0108432	1.167	0.5704	1.294	0.104678	1.543	8.1189e-05	0.573	0.0038984	0.743	0.035001
P55212	Caspase-6 OS=Homo sapiens OX=9606 GN=CASP6 PE=1 SV=2	CASP6	33.31	46.81	25.3	6	7	6	1.148	1.347	1.084	1.279	1.21	0.783	0.685	1.262	0.942	0.911	1.203	0.168342	1.196	0.178458	1.582	0.00048468	1.404	0.0020165	0.949	0.26266	1.067	0.32156
P55263	Adenosine kinase OS=Homo sapiens OX=9606 GN=ADK PE=1 SV=2	ADK	40.545	25.862	8.8	3	5	3	0.982	0.875	1.217	0.741	1.907	0.764	0.721	1.118	1.908	1.08	2.497	0.00010323	1.024	0.90086	1.688	0.00135991	0.686	0.021901	0.515	0.000180497	0.783	0.015244
P55265	Double-stranded RNA-specific adenosine deaminase OS=Homo sapiens OX=9606 GN=ADAR PE=1 SV=4	ADAR	136.06	32.703	3.6	5	7	5	1.125	0.986	1.107	0.743	0.801	1.896	1.19	0.594	0.508	1.011	0.268		0.814	0.50894	0.93		0.735		1.404		1.66
P55327	Tumor protein D52 OS=Homo sapiens OX=9606 GN=TPD52 PE=1 SV=2	TPD52	24.327	39.727	15.2	4	6	4	1.71	0.581	1.953	0.639	0.742	0.934	0.536	1.204	0.359	1.549	0.384	0.0033971	1.056	0.82	3.644	3.8544e-05	0.413	0.000156187	2.305	0.00054108	0.483	0.0064969
P55347	Homeobox protein PKNOX1 OS=Homo sapiens OX=9606 GN=PKNOX1 PE=1 SV=3	PKNOX1	47.606	5.8461	1.8	1	1	1	1.243	1.302	0.966	1.112	0.749	1.166	1.027	0.871	0.855	0.997	0.733		1.139	0.26912	0.941		1.115		1.66		1.495
P55735	Protein SEC13 homolog OS=Homo sapiens OX=9606 GN=SEC13 PE=1 SV=3	SEC13	35.54	57.404	16.8	6	15	6	1.275	0.913	1.123	0.736	0.59	1.586	1.052	0.963	0.559	1.11	0.352	1.8065e-07	0.869	0.55336	1.067	0.2057	0.663	4.4757e-05	2.161	2.3115e-06	0.948	0.051477
P55769	NHP2-like protein 1 OS=Homo sapiens OX=9606 GN=SNU13 PE=1 SV=3	SNU13	14.173	23.052	18.8	2	3	2
P55786	Puromycin-sensitive aminopeptidase OS=Homo sapiens OX=9606 GN=NPEPPS PE=1 SV=2	NPEPPS	103.28	294.67	33.6	30	47	30	0.985	1.162	1.022	1.276	1.211	0.857	0.848	1.023	1.401	0.962	1.635	2.90989e-13	1.193	0.094656	1.205	0.0021438	1.326	5.3918e-08	0.813	1.9972e-07	1.136	0.000120282
P55795	Heterogeneous nuclear ribonucleoprotein H2 OS=Homo sapiens OX=9606 GN=HNRNPH2 PE=1 SV=1	HNRNPH2	49.263	8.3769	10.5	4	7	1	0.971	1.286	1.07	0.701	0.593	1.883	1.077	0.805	0.465	1.026	0.247		0.835	0.54624	0.994		0.683		1.637		1.598
P55809	Succinyl-CoA:3-ketoacid coenzyme A transferase 1, mitochondrial OS=Homo sapiens OX=9606 GN=OXCT1 PE=1 SV=1	OXCT1	56.157	43.552	10.6	7	9	7	0.837	0.485	1.447	0.768	0.559	2.356	1.001	0.558	0.522	1.463	0.222	0.00116066	0.684	0.39852	1.446	0.0023363	0.525	0.00069786	1.497	0.020362	0.869	0.28276
P55884	Eukaryotic translation initiation factor 3 subunit B OS=Homo sapiens OX=9606 GN=EIF3B PE=1 SV=3	EIF3B	92.48	187.34	19.8	14	30	14	1.299	1.294	0.917	0.899	0.634	1.537	0.859	0.936	0.537	1.045	0.349	5.6702e-09	0.987	0.9318	1.068	0.039142	0.86	0.0036983	2.049	6.6648e-07	1.382	6.3335e-07
P55957	BH3-interacting domain death agonist OS=Homo sapiens OX=9606 GN=BID PE=1 SV=1	BID	21.994	6.6151	5.6	1	3	1	0.846	1.179	1.155	1.269	1.31	0.739	1.028	1.032	1.251	1.013	1.693	0.020518	1.113	0.36486	1.124	0.54854	1.253	0.182401	0.646	0.2096	1.142	0.24352
P56134	ATP synthase subunit f, mitochondrial OS=Homo sapiens OX=9606 GN=ATP5J2 PE=1 SV=3	ATP5J2	10.918	7.9156	13.8	1	1	1	1.11	0.741	1.113	0.684	0.577	1.899	1.793	0.602	0.362	0.865	0.191		0.699	0.38812	0.621		0.791		1.924		1.231
P56192	Methionine--tRNA ligase, cytoplasmic OS=Homo sapiens OX=9606 GN=MARS PE=1 SV=2	MARS	101.11	142.26	14.8	11	12	11	1.153	1.057	0.864	0.858	0.611	1.559	1.104	0.798	0.442	1.387	0.284	2.8179e-07	0.801	0.40202	0.783	0.031481	0.619	1.799e-06	1.887	0.00126499	1.325	0.086703
P56277	Cx9C motif-containing protein 4 OS=Homo sapiens OX=9606 GN=CMC4 PE=1 SV=1	CMC4	7.7469	-2	13.2	1	2	1	0.802	0.908	0.571	1.256	1.596	0.747	1.295	1.283	1.61	0.924	2.155		0.881	0.50846	0.441		1.359		0.503		0.708
P56377	AP-1 complex subunit sigma-2 OS=Homo sapiens OX=9606 GN=AP1S2 PE=1 SV=1	AP1S2	18.615	6.9091	5.7	1	1	1	0.909	1.208	1.077	1.113	0.835	1.369	0.9	1.13	0.668	1.02	0.488		0.947	0.67298	1.197		1.091		1.089		1.069
P56378	6.8 kDa mitochondrial proteolipid OS=Homo sapiens OX=9606 GN=MP68 PE=1 SV=1	MP68	6.662	6.4692	15.5	1	2	1	1.02	0.567	1.027	0.53	0.25	2.261	1.962	0.792	0.392	0.705	0.173		0.592	0.48588	0.523		0.752		4.08		0.716
P56381	ATP synthase subunit epsilon, mitochondrial OS=Homo sapiens OX=9606 GN=ATP5F1E PE=1 SV=2	ATP5F1E	5.7797	6.1603	23.5	1	1	1
P56385	ATP synthase subunit e, mitochondrial OS=Homo sapiens OX=9606 GN=ATP5ME PE=1 SV=2	ATP5ME	7.9331	18.892	17.4	2	8	2
P56537	Eukaryotic translation initiation factor 6 OS=Homo sapiens OX=9606 GN=EIF6 PE=1 SV=1	EIF6	26.599	78.929	17.1	3	6	3	1.022	1.145	1.022	1.004	1.023	1.166	0.718	1.084	1.252	0.99	1.074	0.21232	1.093	0.32432	1.423	0.2261	1.014	0.8709	0.999	0.8086	1.056	0.16088
P56556	NADH dehydrogenase [ubiquinone] 1 alpha subcomplex subunit 6 OS=Homo sapiens OX=9606 GN=NDUFA6 PE=1 SV=4	NDUFA6	15.136	22.021	27.3	4	4	4	1.323	1.016	0.56	1.025	0.517	1.68	1.293	0.807	0.451	1.251	0.268		0.789	0.4399	0.433		0.819		2.559		1.259
P56962	Syntaxin-17 OS=Homo sapiens OX=9606 GN=STX17 PE=1 SV=2	STX17	33.403	22.089	12.9	4	4	4
P57088	Transmembrane protein 33 OS=Homo sapiens OX=9606 GN=TMEM33 PE=1 SV=2	TMEM33	27.978	22.058	7.7	2	3	2	1.16	1.205	0.683	0.885	0.633	1.753	1.277	0.857	0.495	0.955	0.282	0.0135982	0.809	0.42258	0.535	0.033604	0.927	0.46562	1.833	0.034722	1.406	0.191638
P57105	Synaptojanin-2-binding protein OS=Homo sapiens OX=9606 GN=SYNJ2BP PE=1 SV=2	SYNJ2BP	15.928	25.589	15.9	2	2	2	1.29	1.227	1.124	0.93	0.98	0.951	1.221	1.042	0.641	0.89	0.674	0.060639	1.025	0.99442	0.921	0.69858	1.045	0.82636	1.316	0.0558	1.178	0.71544
P57678	Gem-associated protein 4 OS=Homo sapiens OX=9606 GN=GEMIN4 PE=1 SV=2	GEMIN4	120.04	18.438	2.5	2	2	2	1.385	1.049	0.971	0.95	0.663	1.528	0.784	0.966	0.419	1.364	0.274		0.9	0.63928	1.239		0.696		2.089		1.086
P57737	Coronin-7 OS=Homo sapiens OX=9606 GN=CORO7 PE=1 SV=2	CORO7	100.6	101.67	11.9	10	11	10	0.946	1.179	0.876	0.981	0.957	1.36	0.856	1.031	1.237	0.93	0.91	0.39892	1.017	0.8451	1.023	0.60776	1.055	0.45374	0.989	0.17088	1.144	0.186082
P57740	Nuclear pore complex protein Nup107 OS=Homo sapiens OX=9606 GN=NUP107 PE=1 SV=1	NUP107	106.37	17.963	1.5	1	1	1	1.382	1.148	0.899	0.673	0.524	1.23	1.251	0.976	0.763	1.311	0.62		0.919	0.7588	0.719		0.513		2.637		1.176
P57764	Gasdermin-D OS=Homo sapiens OX=9606 GN=GSDMD PE=1 SV=1	GSDMD	52.8	20.82	7.4	3	3	3	1.13	1.585	0.752	1.174	0.828	1.026	0.968	1.043	0.668	1.117	0.651	0.167977	1.066	0.91176	0.777	0.31838	1.051	0.2158	1.365	0.1816	1.52	0.112116
P57772	Selenocysteine-specific elongation factor OS=Homo sapiens OX=9606 GN=EEFSEC PE=1 SV=4	EEFSEC	65.304	88.758	15.1	8	11	8	1.193	0.974	0.864	0.808	0.901	1.563	0.931	1.002	0.891	1.183	0.57	0.000159296	0.848	0.24344	0.928	0.048605	0.683	3.5523e-05	1.324	0.042764	0.972	0.91454
P58546	Myotrophin OS=Homo sapiens OX=9606 GN=MTPN PE=1 SV=2	MTPN	12.895	82.135	33.1	3	11	3	0.913	0.927	1.657	0.924	1.557	0.521	0.757	1.19	1.994	0.907	3.827	3.4466e-07	1.301	0.31274	2.189	1.0077e-06	1.019	0.82928	0.586	1.3182e-09	0.779	0.00027947
P59665	Neutrophil defensin 1 OS=Homo sapiens OX=9606 GN=DEFA1 PE=1 SV=1	DEFA1	10.201	31.477	28.7	4	22	1	1.091	2.905	0.408	1.703	0.41	0.406	0.637	1.308	0.657	0.695	1.618		1.957	0.21916	0.641		2.45		2.661		2.221
P59666	Neutrophil defensin 3 OS=Homo sapiens OX=9606 GN=DEFA3 PE=1 SV=1	DEFA3	10.245	-2	28.7	4	23	1	1.112	3.539	0.27	1.51	0.238	0.275	0.594	0.811	0.419	1.395	1.524		2.068	0.36392	0.455		1.082		4.672		4.364
P59768	Guanine nucleotide-binding protein G(I)/G(S)/G(O) subunit gamma-2 OS=Homo sapiens OX=9606 GN=GNG2 PE=1 SV=2	GNG2	7.8501	57.242	52.1	3	6	3	0.942	1.351	0.701	0.78	1.111	0.924	1.108	1.18	0.842	1.214	0.911	0.60418	0.834	0.133201	0.633	0.198161	0.643	0.2807	0.848	0.25254	1.145	0.2057
P59998	Actin-related protein 2/3 complex subunit 4 OS=Homo sapiens OX=9606 GN=ARPC4 PE=1 SV=3	ARPC4	19.667	39.351	28	5	9	5	1.266	1.777	0.629	1.055	0.804	0.993	0.895	1.117	0.691	0.934	0.696	0.0197838	1.142	0.76158	0.703	0.038517	1.13	0.26018	1.575	0.0018561	1.591	0.0176833
P60059	Protein transport protein Sec61 subunit gamma OS=Homo sapiens OX=9606 GN=SEC61G PE=1 SV=1	SEC61G	7.7412	6.2698	19.1	1	1	1	1.411	1.084	1.676	0.511	0.832	1.193	0.92	0.766	0.894	1.044	0.749		1.173	0.6801	1.822		0.489		1.696		1.415
P60174	Triosephosphate isomerase OS=Homo sapiens OX=9606 GN=TPI1 PE=1 SV=3	TPI1	30.791	116.17	42.3	10	13	10	1.146	1.011	0.968	0.751	1.322	1.047	0.768	1.333	1.042	0.985	0.995	0.91308	0.902	0.47766	1.26	0.18198	0.762	0.006739	0.867	0.153835	0.758	0.176745
P60228	Eukaryotic translation initiation factor 3 subunit E OS=Homo sapiens OX=9606 GN=EIF3E PE=1 SV=1	EIF3E	52.22	80.497	23.6	9	14	9	1.335	1.272	0.837	0.815	0.632	1.659	0.787	0.903	0.435	1.199	0.262	0.00023828	0.906	0.67422	1.064	0.92418	0.68	2.0749e-05	2.112	0.00149726	1.409	0.0087422
P60468	Protein transport protein Sec61 subunit beta OS=Homo sapiens OX=9606 GN=SEC61B PE=1 SV=2	SEC61B	9.9743	54.525	37.5	3	6	3	1.25	0.647	0.992	0.828	0.419	2.09	1.026	0.718	0.432	1.07	0.207	1.2597e-06	0.779	0.59894	0.967	0.96692	0.774	0.122883	2.983	0.0140358	0.901	0.56494
P60510	Serine/threonine-protein phosphatase 4 catalytic subunit OS=Homo sapiens OX=9606 GN=PPP4C PE=1 SV=1	PPP4C	35.08	7.9446	8.8	2	3	1	0.925	1.329	1.222	0.751	1.143	1.194	0.874	0.883	0.924	1.254	0.774		0.963	0.72358	1.398		0.599		0.809		1.505
P60520	Gamma-aminobutyric acid receptor-associated protein-like 2 OS=Homo sapiens OX=9606 GN=GABARAPL2 PE=1 SV=1	GABARAPL2	13.667	18.149	23.1	2	3	2	1.001	1.068	0.817	1.017	1.192	1.186	0.8	1.23	1.136	1.171	0.958		0.903	0.35646	1.021		0.868		0.84		0.868
P60602	Reactive oxygen species modulator 1 OS=Homo sapiens OX=9606 GN=ROMO1 PE=1 SV=1	ROMO1	8.1828	24.386	31.6	2	2	2
P60604	Ubiquitin-conjugating enzyme E2 G2 OS=Homo sapiens OX=9606 GN=UBE2G2 PE=1 SV=1	UBE2G2	18.566	7.6974	9.1	1	1	1
P60660	Myosin light polypeptide 6 OS=Homo sapiens OX=9606 GN=MYL6 PE=1 SV=2	MYL6	16.93	76.89	37.1	5	17	5	1.074	1.797	0.738	1.35	0.708	0.774	1.248	0.967	0.687	0.856	0.888	0.28108	1.24	0.4351	0.591	3.6657e-06	1.577	1.4497e-07	1.517	0.00087924	1.858	1.66533e-15
P60842	Eukaryotic initiation factor 4A-I OS=Homo sapiens OX=9606 GN=EIF4A1 PE=1 SV=1	EIF4A1	46.153	198.13	38.9	17	49	8	0.962	0.975	1.012	0.888	1.123	1.246	0.901	1.023	1.082	1.232	0.868	0.52454	0.89	0.1454	1.123	0.07716	0.721	3.8514e-09	0.857	0.00042263	0.953	0.062735
P60866	40S ribosomal protein S20 OS=Homo sapiens OX=9606 GN=RPS20 PE=1 SV=1	RPS20	13.373	40.028	30.3	4	10	4	1.205	0.745	0.986	1.073	0.433	1.773	1.012	0.924	0.564	1.462	0.318	0.00121756	0.816	0.64248	0.974	0.33808	0.734	0.0085042	2.783	0.0060815	0.806	0.54772
P60891	Ribose-phosphate pyrophosphokinase 1 OS=Homo sapiens OX=9606 GN=PRPS1 PE=1 SV=2	PRPS1	34.834	309.76	34.9	10	25	4	0.694	0.588	1.544	0.946	1.86	0.6	1.114	0.956	2.346	0.832	3.91	6.0192e-07	1.141	0.83226	1.386	0.00138278	1.137	0.065136	0.373	1.0655e-06	0.615	0.00028045
P60900	Proteasome subunit alpha type-6 OS=Homo sapiens OX=9606 GN=PSMA6 PE=1 SV=1	PSMA6	27.399	198.19	50	13	49	13	0.787	0.931	1.146	1.125	1.491	0.896	1.127	0.955	1.547	0.913	1.727	1.18794e-14	1.029	0.88836	1.017	0.58256	1.232	0.00029681	0.528	1e-32	0.975	0.57434
P60903	Protein S100-A10 OS=Homo sapiens OX=9606 GN=S100A10 PE=1 SV=2	S100A10	11.203	17.82	17.5	2	2	2	1.254	1.813	0.911	0.979	0.329	1.426	0.821	0.99	0.319	1.002	0.224		1.155	0.7891	1.11		0.977		3.812		1.831
P60953	Cell division control protein 42 homolog OS=Homo sapiens OX=9606 GN=CDC42 PE=1 SV=2	CDC42	21.258	34.592	16.8	3	9	3	0.805	1.119	1.054	1.153	1.143	1.01	1.11	1.071	1.075	0.842	1.064	0.075544	1.006	0.96652	0.95	0.75326	1.369	0.00030314	0.704	0.00129967	1.045	0.72822
P60981	Destrin OS=Homo sapiens OX=9606 GN=DSTN PE=1 SV=3	DSTN	18.506	40.412	24.2	6	7	6	1.148	1.005	1.03	0.73	0.942	1.583	0.742	1.232	0.746	1.092	0.471	0.25924	0.833	0.31832	1.388	0.001662	0.668	0.0023154	1.219	0.50558	0.816	0.15006
P60983	Glia maturation factor beta OS=Homo sapiens OX=9606 GN=GMFB PE=1 SV=2	GMFB	16.713	37.835	21.8	4	6	3	0.947	0.95	1.261	1.043	1.56	0.597	0.799	1.3	1.75	0.917	2.931	0.0111998	1.15	0.43624	1.578	0.0092761	1.137	0.47622	0.607	0.058915	0.731	0.09476
P61006	Ras-related protein Rab-8A OS=Homo sapiens OX=9606 GN=RAB8A PE=1 SV=1	RAB8A	23.668	63.661	33.3	7	14	5	0.906	1.115	0.898	1.129	1.13	1.146	1.263	0.84	1.122	0.904	0.979	0.68664	0.979	0.8727	0.711	0.0126004	1.249	0.55154	0.802	0.036082	1.327	0.28156
P61009	Signal peptidase complex subunit 3 OS=Homo sapiens OX=9606 GN=SPCS3 PE=1 SV=1	SPCS3	20.313	53.649	18.9	4	6	4	2.277	0.466	0.677	0.596	0.348	2.241	1.328	0.538	0.272	0.796	0.121	0.00132337	0.817	0.59234	0.51	0.00042047	0.749	0.047161	6.543	3.0361e-06	0.866	0.26458
P61011	Signal recognition particle 54 kDa protein OS=Homo sapiens OX=9606 GN=SRP54 PE=1 SV=1	SRP54	55.704	44.976	10.1	5	8	5	1.279	0.81	1.064	0.854	0.593	2.268	0.86	0.796	0.427	0.924	0.188	2.8314e-07	0.815	0.62208	1.237	0.0095761	0.924	0.2595	2.157	3.6235e-05	1.018	0.5956
P61019	Ras-related protein Rab-2A OS=Homo sapiens OX=9606 GN=RAB2A PE=1 SV=1	RAB2A	23.545	93.446	24.5	4	8	3	1.098	1.158	1.182	1.151	1.058	0.893	0.944	1.138	0.958	1.131	1.073	0.46434	1.074	0.26822	1.252	0.0091403	1.018	0.8942	1.038	0.26654	1.018	0.49206
P61020	Ras-related protein Rab-5B OS=Homo sapiens OX=9606 GN=RAB5B PE=1 SV=1	RAB5B	23.707	87.267	38.6	7	12	4	0.653	1.003	1.268	1.078	1.257	0.78	0.953	1.167	1.352	1.195	1.733	0.00108031	1	0.92688	1.331	0.024117	0.902	0.91108	0.519	0.0029754	0.859	0.083443
P61081	NEDD8-conjugating enzyme Ubc12 OS=Homo sapiens OX=9606 GN=UBE2M PE=1 SV=1	UBE2M	20.9	63.609	32.8	6	11	6	1.252	1.132	1.074	0.926	0.97	1.085	0.851	1.104	1.238	0.944	1.141	0.028821	1.135	0.124361	1.262	0.00124355	0.981	0.35654	1.291	0.021877	1.025	0.85688
P61086	Ubiquitin-conjugating enzyme E2 K OS=Homo sapiens OX=9606 GN=UBE2K PE=1 SV=3	UBE2K	22.406	63.933	25	4	5	4	0.96	1.246	1.352	0.94	1.244	0.582	0.623	1.563	1.045	1.017	1.796	0.0063554	1.102	0.46144	2.17	3.7727e-05	0.924	0.46272	0.772	0.09482	0.797	0.75812
P61088	Ubiquitin-conjugating enzyme E2 N OS=Homo sapiens OX=9606 GN=UBE2N PE=1 SV=1	UBE2N	17.138	20.255	21.7	3	4	3	0.93	0.885	1.123	0.605	2.298	0.684	0.65	1.407	1.292	1.366	1.889	0.0176583	0.755	0.48262	1.728	0.09746	0.443	0.068741	0.405	0.0068955	0.629	0.044761
P61106	Ras-related protein Rab-14 OS=Homo sapiens OX=9606 GN=RAB14 PE=1 SV=4	RAB14	23.897	54.501	33	6	12	6	1.031	1.151	0.953	0.987	1.191	0.931	1.071	1.018	1.041	1.15	1.118	0.152836	0.963	0.52684	0.89	0.022222	0.858	0.02504	0.866	0.181497	1.131	0.10594
P61158	Actin-related protein 3 OS=Homo sapiens OX=9606 GN=ACTR3 PE=1 SV=3	ACTR3	47.371	257.04	35.4	13	29	12	1.217	1.709	0.754	1.049	0.798	0.899	0.876	1.04	0.68	0.988	0.756	0.036564	1.176	0.55938	0.861	0.0007164	1.062	0.23692	1.525	1.6553e-06	1.643	1.831e-10
P61160	Actin-related protein 2 OS=Homo sapiens OX=9606 GN=ACTR2 PE=1 SV=1	ACTR2	44.76	178.02	26.9	9	36	9	1.122	1.819	0.705	1.107	0.773	0.952	0.927	1.09	0.71	1.054	0.746	7.9044e-07	1.139	0.70342	0.761	1.4031e-09	1.05	0.48166	1.451	8.2339e-09	1.669	1.11022e-16
P61163	Alpha-centractin OS=Homo sapiens OX=9606 GN=ACTR1A PE=1 SV=1	ACTR1A	42.613	156.63	18.1	6	16	3	0.736	1.03	1.072	1.277	1.21	0.762	1.172	1.098	1.439	0.937	1.888	0.0070647	1.072	0.68956	0.915	0.04352	1.363	5.9813e-05	0.608	0.002479	0.938	0.78786
P61201	COP9 signalosome complex subunit 2 OS=Homo sapiens OX=9606 GN=COPS2 PE=1 SV=1	COPS2	51.596	179.82	30.2	13	28	13	0.836	0.976	1.043	1.112	1.48	0.84	1.046	1.163	1.327	0.929	1.58	6.1881e-07	0.97	0.86062	0.997	0.86334	1.197	0.093642	0.565	9.93094e-13	0.839	0.0020768
P61221	ATP-binding cassette sub-family E member 1 OS=Homo sapiens OX=9606 GN=ABCE1 PE=1 SV=1	ABCE1	67.314	95.662	18.5	10	16	10	1.153	1.091	0.862	1.02	0.763	1.533	0.89	0.834	0.796	1.161	0.519	1.1252e-07	0.95	0.85708	0.969	0.47742	0.879	0.0023196	1.511	0.000143404	1.308	0.00128199
P61224	Ras-related protein Rap-1b OS=Homo sapiens OX=9606 GN=RAP1B PE=1 SV=1	RAP1B	20.825	97.162	27.2	5	12	3	0.787	1.001	1.393	0.912	1.344	0.72	1.049	1.298	1.171	0.883	1.626	4.034e-05	0.994	0.99266	1.328	0.0058184	1.033	0.56022	0.586	2.2163e-05	0.771	0.000199733
P61225	Ras-related protein Rap-2b OS=Homo sapiens OX=9606 GN=RAP2B PE=1 SV=1	RAP2B	20.504	33.539	24.6	4	5	4	0.767	1.027	1.12	1.413	1.502	0.722	1.14	0.844	1.608	0.842	2.227	0.0163586	1.175	0.39576	0.982	0.58996	1.678	0.0086396	0.511	0.034181	1.217	0.133657
P61247	40S ribosomal protein S3a OS=Homo sapiens OX=9606 GN=RPS3A PE=1 SV=2	RPS3A	29.945	74.272	34.5	9	21	9	1.439	0.837	0.922	0.825	0.393	1.958	0.772	0.78	0.415	1.132	0.212	3.5928e-08	0.881	0.85026	1.194	0.010698	0.729	0.00073948	3.662	3.6327e-06	1.073	0.81648
P61254	60S ribosomal protein L26 OS=Homo sapiens OX=9606 GN=RPL26 PE=1 SV=1	RPL26	17.258	19.008	17.9	3	5	1	1.031	0.36	1.18	0.699	0.315	3.472	0.742	0.303	0.421	0.894	0.121	0.00132192	0.645	0.8372	1.59	0.116097	0.782	0.195464	3.273	0.012023	1.188	0.55046
P61289	Proteasome activator complex subunit 3 OS=Homo sapiens OX=9606 GN=PSME3 PE=1 SV=1	PSME3	29.506	37.342	20.5	5	9	5	1.075	1.382	1.041	0.882	0.835	1.217	0.92	0.894	0.661	1.133	0.543	0.036019	1.008	0.94656	1.132	0.25616	0.778	0.178497	1.287	0.22724	1.546	0.0006371
P61313	60S ribosomal protein L15 OS=Homo sapiens OX=9606 GN=RPL15 PE=1 SV=2	RPL15	24.146	14.03	8.8	2	2	2	1.316	0.789	0.973	0.568	0.595	1.849	0.81	1.051	0.733	1.41	0.396	0.22574	0.766	0.37674	1.201	0.033155	0.403	0.046482	2.212	0.071743	0.751	0.3233
P61326	Protein mago nashi homolog OS=Homo sapiens OX=9606 GN=MAGOH PE=1 SV=1	MAGOH	17.163	125.84	30.8	5	10	5	0.963	1.216	1.065	1	0.836	1.225	1.031	0.925	1.029	0.999	0.84	0.194895	1.051	0.48514	1.033	0.88964	1.001	0.72776	1.152	0.27354	1.315	0.0020418
P61353	60S ribosomal protein L27 OS=Homo sapiens OX=9606 GN=RPL27 PE=1 SV=2	RPL27	15.798	51.414	28.7	3	5	3	1.278	0.58	1.04	0.613	0.394	2.11	0.776	0.957	0.356	1.429	0.169	9.6981e-05	0.682	0.38874	1.34	0.022903	0.429	0.000159459	3.244	0.041815	0.606	0.023464
P61421	V-type proton ATPase subunit d 1 OS=Homo sapiens OX=9606 GN=ATP6V0D1 PE=1 SV=1	ATP6V0D1	40.329	42.259	8.8	3	4	3	1.313	1.993	0.469	1.195	0.676	1.142	0.924	0.76	0.571	0.999	0.5	0.048565	1.231	0.76858	0.508	0.000102779	1.196	0.015239	1.942	0.0024607	2.622	0.000139769
P61457	Pterin-4-alpha-carbinolamine dehydratase OS=Homo sapiens OX=9606 GN=PCBD1 PE=1 SV=2	PCBD1	11.999	21.412	29.8	3	3	3	1.094	1.158	1.093	1.056	1.239	0.548	0.81	1.227	1.714	1.076	3.128	0.064183	1.248	0.20368	1.349	0.041045	0.981	0.69404	0.883	0.3687	0.944	0.66896
P61513	60S ribosomal protein L37a OS=Homo sapiens OX=9606 GN=RPL37A PE=1 SV=2	RPL37A	10.275	18.126	18.5	3	4	3	1.384	0.624	1.071	0.904	0.269	2.449	0.774	0.704	0.328	1.146	0.134		0.807	0.85754	1.384		0.789		5.145		0.886
P61586	Transforming protein RhoA OS=Homo sapiens OX=9606 GN=RHOA PE=1 SV=1	RHOA	21.768	68.194	28.5	7	15	7	0.946	1.072	1.075	1.041	1.049	0.99	1.043	1.16	1.161	0.927	1.173	0.0119994	1.024	0.63216	1.031	0.094637	1.123	0.6303	0.902	0.044459	0.924	0.58354
P61604	10 kDa heat shock protein, mitochondrial OS=Homo sapiens OX=9606 GN=HSPE1 PE=1 SV=2	HSPE1	10.932	51.862	62.7	7	11	7	0.896	0.755	1.644	0.707	0.756	1.144	1.669	0.704	0.493	1.353	0.431	3.6222e-05	0.799	0.35524	0.985	0.7804	0.523	1.1278e-10	1.185	0.38478	1.072	0.93942
P61619	Protein transport protein Sec61 subunit alpha isoform 1 OS=Homo sapiens OX=9606 GN=SEC61A1 PE=1 SV=2	SEC61A1	52.264	25.03	6.7	3	9	3	1.105	1.031	0.94	0.953	0.544	1.509	1.06	0.755	0.518	1.338	0.343	0.000135938	0.873	0.67214	0.887	0.166863	0.712	0.0020628	2.031	9.945e-05	1.366	0.148543
P61626	Lysozyme C OS=Homo sapiens OX=9606 GN=LYZ PE=1 SV=1	LYZ	16.537	107.2	50.7	7	22	7	0.942	2.422	0.523	1.304	0.686	0.693	1.231	0.928	0.7	0.817	1.01	0.89358	1.353	0.54758	0.425	2.5307e-09	1.596	0.0012204	1.373	0.00056237	2.61	9.2102e-08
P61758	Prefoldin subunit 3 OS=Homo sapiens OX=9606 GN=VBP1 PE=1 SV=3	VBP1	22.658	83.126	42.1	8	17	8	0.966	1.216	1.124	1.248	1.054	1.089	0.756	1.14	0.93	0.848	0.854	0.0152584	1.122	0.2598	1.487	4.1141e-06	1.472	4.8662e-07	0.917	0.0162404	1.067	0.0193378
P61769	Beta-2-microglobulin OS=Homo sapiens OX=9606 GN=B2M PE=1 SV=1	B2M	13.714	21.398	16.8	2	2	2	1.043	0.958	2.466	0.641	0.782	0.681	0.405	1.655	0.182	1.543	0.267		1.044	0.80142	6.089		0.415		1.334		0.579
P61803	Dolichyl-diphosphooligosaccharide--protein glycosyltransferase subunit DAD1 OS=Homo sapiens OX=9606 GN=DAD1 PE=1 SV=3	DAD1	12.497	23.829	19.5	2	3	2
P61916	NPC intracellular cholesterol transporter 2 OS=Homo sapiens OX=9606 GN=NPC2 PE=1 SV=1	NPC2	16.57	19.933	16.6	2	3	2	1.381	1.672	0.646	1.02	0.917	0.975	0.976	0.937	0.703	0.934	0.721	0.0022812	1.144	0.73444	0.662	0.030078	1.092	0.29644	1.506	0.029023	1.784	0.0147371
P61923	Coatomer subunit zeta-1 OS=Homo sapiens OX=9606 GN=COPZ1 PE=1 SV=1	COPZ1	20.198	21.247	11.9	2	4	2	1.353	1.095	0.837	0.941	0.523	1.927	0.964	0.761	0.427	1.018	0.222	0.00157635	0.896	0.78268	0.868	0.0034569	0.924	0.3117	2.587	0.010518	1.439	0.0120211
P61960	Ubiquitin-fold modifier 1 OS=Homo sapiens OX=9606 GN=UFM1 PE=1 SV=1	UFM1	9.1175	16.459	27.1	2	3	2	1.197	1.027	1.278	0.906	1.044	0.94	0.863	0.935	1.382	1.053	1.47	0.65656	1.198	0.07774	1.481	0.0080229	0.86	0.2454	1.147	0.19976	1.098	0.8095
P61962	DDB1- and CUL4-associated factor 7 OS=Homo sapiens OX=9606 GN=DCAF7 PE=1 SV=1	DCAF7	38.926	23.346	7	2	2	2
P61964	WD repeat-containing protein 5 OS=Homo sapiens OX=9606 GN=WDR5 PE=1 SV=1	WDR5	36.588	13.95	6.3	2	2	2	1.015	1.106	1.072	1.002	0.867	1.371	1.138	0.886	0.975	0.874	0.711	0.5318	1.007	0.81946	0.942	0.73736	1.146	0.29702	1.171	0.52668	1.248	0.3492
P61970	Nuclear transport factor 2 OS=Homo sapiens OX=9606 GN=NUTF2 PE=1 SV=1	NUTF2	14.478	32.188	29.9	3	11	3	0.948	0.807	1.919	0.739	1.774	0.365	0.55	1.164	2.433	0.939	6.666	1.6516e-10	1.429	0.32942	3.489	5.1124e-10	0.787	0.40558	0.534	7.914e-07	0.693	0.00028461
P61978	Heterogeneous nuclear ribonucleoprotein K OS=Homo sapiens OX=9606 GN=HNRNPK PE=1 SV=1	HNRNPK	50.976	195.35	27.6	12	18	12	1.128	0.957	1.257	0.911	0.568	1.541	0.927	0.807	0.842	1.007	0.546	0.00075947	1.051	0.62106	1.356	3.8878e-05	0.905	0.64868	1.986	0.0025357	1.186	0.049156
P61981	14-3-3 protein gamma OS=Homo sapiens OX=9606 GN=YWHAG PE=1 SV=2	YWHAG	28.302	66.749	31.2	9	51	6	0.976	1.233	1.005	0.832	1.108	1.062	0.952	1.079	1.06	1.179	0.998	0.91612	0.949	0.44744	1.056	0.027499	0.706	0.0030372	0.881	0.045224	1.143	0.060065
P62072	Mitochondrial import inner membrane translocase subunit Tim10 OS=Homo sapiens OX=9606 GN=TIMM10 PE=1 SV=1	TIMM10	10.333	18.116	33.3	3	4	3	1.068	1.137	1.177	1.034	0.462	1.489	1.303	0.899	0.315	0.991	0.212	0.0069046	0.92	0.74718	0.903	0.5492	1.043	0.74414	2.312	0.026897	1.265	0.2454
P62081	40S ribosomal protein S7 OS=Homo sapiens OX=9606 GN=RPS7 PE=1 SV=1	RPS7	22.127	30.033	17.5	4	6	4	1.211	0.607	1.149	0.629	0.429	2.424	0.846	0.774	0.382	1.41	0.158	1.1831e-07	0.676	0.4179	1.358	0.00094079	0.446	6.1815e-07	2.823	0.00046407	0.784	0.3677
P62136	Serine/threonine-protein phosphatase PP1-alpha catalytic subunit OS=Homo sapiens OX=9606 GN=PPP1CA PE=1 SV=1	PPP1CA	37.512	12.554	23.3	7	8	2	1.032	1.84	0.895	1.004	0.558	1.106	1.052	1.129	0.517	0.921	0.467		1.11	0.82982	0.851		1.09		1.849		1.63
P62140	Serine/threonine-protein phosphatase PP1-beta catalytic subunit OS=Homo sapiens OX=9606 GN=PPP1CB PE=1 SV=3	PPP1CB	37.186	7.8232	21.4	6	9	1	0.944	1.256	1.081	1.152	0.764	1.184	0.892	1.031	1.095	1.023	0.925		1.13	0.181358	1.212		1.126		1.236		1.218
P62191	26S proteasome regulatory subunit 4 OS=Homo sapiens OX=9606 GN=PSMC1 PE=1 SV=1	PSMC1	49.184	277.37	42.7	19	44	19	0.798	0.792	1.159	1.186	1.232	0.993	1.122	1.043	1.455	0.941	1.465	1.11022e-15	1.011	0.92346	1.033	0.120619	1.26	7.2666e-10	0.648	1e-32	0.759	4.28235e-12
P62195	26S proteasome regulatory subunit 8 OS=Homo sapiens OX=9606 GN=PSMC5 PE=1 SV=1	PSMC5	45.626	240.55	50.5	20	67	19	0.862	0.884	1.007	1.153	1.18	1.056	1.079	1.077	1.181	1.013	1.118	0.00058211	0.941	0.35924	0.933	0.0059634	1.138	0.00021741	0.731	1.57874e-13	0.821	0.00074414
P62241	40S ribosomal protein S8 OS=Homo sapiens OX=9606 GN=RPS8 PE=1 SV=2	RPS8	24.205	104.73	29.3	5	11	5	1.437	0.657	1.099	0.711	0.483	2.115	0.847	0.732	0.397	1.081	0.188	4.4507e-05	0.818	0.6207	1.298	0.086038	0.658	0.00054066	2.975	0.00030207	0.898	0.68212
P62244	40S ribosomal protein S15a OS=Homo sapiens OX=9606 GN=RPS15A PE=1 SV=2	RPS15A	14.839	16.642	17.7	2	6	2	1.552	0.69	0.99	0.704	0.51	2.01	0.901	0.838	0.408	1.274	0.203	2.1931e-05	0.785	0.4804	1.099	0.77426	0.553	0.00031548	3.043	0.009901	0.823	0.190816
P62249	40S ribosomal protein S16 OS=Homo sapiens OX=9606 GN=RPS16 PE=1 SV=2	RPS16	16.445	57.868	45.2	8	14	8	1.559	0.88	1.074	0.82	0.567	1.578	0.873	0.845	0.507	1.289	0.321	6.3169e-08	0.939	0.8037	1.23	0.0031966	0.636	5.4717e-07	2.75	2.9895e-09	1.041	0.39938
P62253	Ubiquitin-conjugating enzyme E2 G1 OS=Homo sapiens OX=9606 GN=UBE2G1 PE=1 SV=3	UBE2G1	19.509	7.434	7.1	1	1	1
P62258	14-3-3 protein epsilon OS=Homo sapiens OX=9606 GN=YWHAE PE=1 SV=1	YWHAE	29.174	233.13	59.6	17	82	15	1	1.129	0.923	1.014	1.103	1.103	0.957	1.028	1.219	1	1.105	0.00175762	1.018	0.80054	0.964	0.087304	1.014	0.96712	0.907	1.75605e-05	1.098	6.436e-05
P62263	40S ribosomal protein S14 OS=Homo sapiens OX=9606 GN=RPS14 PE=1 SV=3	RPS14	16.273	84.267	37.7	5	8	5	1.269	0.863	0.869	1.001	0.636	1.596	1.054	0.791	0.673	1.121	0.422	0.0040418	0.899	0.6882	0.824	0.23344	0.893	0.20556	1.995	0.0107421	1.091	0.45418
P62266	40S ribosomal protein S23 OS=Homo sapiens OX=9606 GN=RPS23 PE=1 SV=3	RPS23	15.807	30.99	21.7	4	5	4	1.145	0.929	0.986	1.067	0.694	1.407	1.032	0.815	0.898	0.963	0.638	0.02064	1.023	0.71602	0.955	0.52194	1.108	0.8706	1.65	0.062983	1.14	0.33048
P62269	40S ribosomal protein S18 OS=Homo sapiens OX=9606 GN=RPS18 PE=1 SV=3	RPS18	17.718	43.919	25	4	7	4	1.503	0.749	1.285	0.824	0.435	2.041	0.784	0.614	0.486	1.146	0.238	0.036082	0.966	0.92232	1.639	0.056944	0.719	0.067101	3.455	0.20068	1.22	0.26602
P62277	40S ribosomal protein S13 OS=Homo sapiens OX=9606 GN=RPS13 PE=1 SV=2	RPS13	17.222	35.431	23.8	3	3	3	1.138	0.834	0.809	0.899	0.544	1.725	0.964	0.94	0.463	1.266	0.268	0.0131184	0.762	0.34394	0.839	0.24832	0.71	0.3055	2.092	0.34314	0.887	0.93694
P62280	40S ribosomal protein S11 OS=Homo sapiens OX=9606 GN=RPS11 PE=1 SV=3	RPS11	18.431	51.789	28.5	5	8	5	1.072	0.61	1.177	0.646	0.536	2.738	0.981	0.567	0.598	0.881	0.218	1.235e-06	0.719	0.60526	1.2	0.0078833	0.733	0.013801	2	0.0002426	1.076	0.9257
P62304	Small nuclear ribonucleoprotein E OS=Homo sapiens OX=9606 GN=SNRPE PE=1 SV=1	SNRPE	10.803	7.5372	13	1	2	1	1.492	0.959	0.99	0.668	0.833	1.628	0.965	0.821	0.699	1.085	0.429		0.902	0.56986	1.026		0.616		1.791		1.168
P62310	U6 snRNA-associated Sm-like protein LSm3 OS=Homo sapiens OX=9606 GN=LSM3 PE=1 SV=2	LSM3	11.845	7.9906	11.8	1	2	1	0.979	1.365	1.293	0.986	0.934	1.172	0.962	0.938	0.676	0.986	0.577	0.0174586	1.061	0.80586	1.344	0.084279	1	0.9963	1.048	0.8074	1.455	0.128835
P62312	U6 snRNA-associated Sm-like protein LSm6 OS=Homo sapiens OX=9606 GN=LSM6 PE=1 SV=1	LSM6	9.1275	24.482	25	3	4	3	0.867	1.341	1.664	1.001	0.654	1.112	0.891	0.958	0.916	0.911	0.824	0.58026	1.279	0.169356	1.868	0.099062	1.099	0.58926	1.326	0.42982	1.4	0.121777
P62314	Small nuclear ribonucleoprotein Sm D1 OS=Homo sapiens OX=9606 GN=SNRPD1 PE=1 SV=1	SNRPD1	13.281	8.6412	10.9	1	1	1
P62316	Small nuclear ribonucleoprotein Sm D2 OS=Homo sapiens OX=9606 GN=SNRPD2 PE=1 SV=1	SNRPD2	13.527	67.76	48.3	6	15	6	0.973	1.236	0.941	0.978	0.618	1.649	1.232	0.763	0.586	0.877	0.355	5.1762e-08	0.917	0.81416	0.764	1.82346e-05	1.115	0.37666	1.574	0.0110568	1.62	1.3533e-06
P62318	Small nuclear ribonucleoprotein Sm D3 OS=Homo sapiens OX=9606 GN=SNRPD3 PE=1 SV=1	SNRPD3	13.916	65.589	31.7	3	11	3	0.907	1.289	0.919	0.923	0.499	1.669	1.193	0.742	0.569	0.865	0.341	0.001802	0.927	0.92246	0.77	0.077058	1.067	0.76708	1.818	0.00077797	1.737	0.00142146
P62330	ADP-ribosylation factor 6 OS=Homo sapiens OX=9606 GN=ARF6 PE=1 SV=2	ARF6	20.082	26.061	21.1	3	10	3	0.948	1.085	1.156	0.939	1.164	1.198	0.983	1.097	1.104	1.033	0.922	0.5162	0.956	0.43144	1.176	0.0092366	0.909	0.34162	0.814	0.0027223	0.989	0.75964
P62333	26S proteasome regulatory subunit 10B OS=Homo sapiens OX=9606 GN=PSMC6 PE=1 SV=1	PSMC6	44.172	174.35	39.6	15	37	15	0.783	0.764	1.312	1.057	1.352	0.769	1.031	1.008	1.613	1.001	2.098	7.87148e-14	1.071	0.80896	1.273	0.000196996	1.056	0.092464	0.579	8.4989e-10	0.758	8.1481e-05
P62341	Thioredoxin reductase-like selenoprotein T OS=Homo sapiens OX=9606 GN=SELENOT PE=1 SV=2	SELENOT	22.324	5.8999	5.1	1	1	1
P62424	60S ribosomal protein L7a OS=Homo sapiens OX=9606 GN=RPL7A PE=1 SV=2	RPL7A	29.995	119.12	39.1	11	18	11	1.313	0.61	0.983	0.727	0.513	2.022	0.851	0.872	0.395	1.358	0.195	1.9127e-07	0.717	0.35198	1.155	0.3108	0.535	0.00061803	2.559	2.5527e-07	0.7	0.101936
P62491	Ras-related protein Rab-11A OS=Homo sapiens OX=9606 GN=RAB11A PE=1 SV=3	RAB11A	24.393	44.932	24.1	5	8	5	1.115	1.044	1.017	0.981	1.145	1.049	0.965	1.241	1.148	1.002	1.094	0.53286	0.982	0.78084	1.054	0.4302	0.979	0.96098	0.974	0.31172	0.841	0.45816
P62495	Eukaryotic peptide chain release factor subunit 1 OS=Homo sapiens OX=9606 GN=ETF1 PE=1 SV=3	ETF1	49.03	98.778	18.5	8	16	8	1.031	1.098	0.828	0.999	0.889	1.552	0.852	1.132	0.878	1.064	0.566	8.5115e-08	0.881	0.3869	0.972	0.5249	0.939	0.38442	1.16	0.0102635	0.97	0.45838
P62633	Cellular nucleic acid-binding protein OS=Homo sapiens OX=9606 GN=CNBP PE=1 SV=1	CNBP	19.463	60.05	32.2	6	9	6	1.315	1.529	1.173	0.867	0.427	1.032	0.618	1.278	0.373	1.407	0.361	0.00063535	1.104	0.80004	1.898	2.387e-05	0.616	0.000103962	3.08	5.4992e-08	1.196	0.2076
P62701	40S ribosomal protein S4, X isoform OS=Homo sapiens OX=9606 GN=RPS4X PE=1 SV=2	RPS4X	29.597	66.188	25.9	6	12	6	1.298	0.826	0.838	0.69	0.514	1.874	0.953	0.813	0.508	1.333	0.271	5.2864e-09	0.758	0.41472	0.879	0.42354	0.518	0.00100307	2.525	0.00022485	1.016	0.66154
P62714	Serine/threonine-protein phosphatase 2A catalytic subunit beta isoform OS=Homo sapiens OX=9606 GN=PPP2CB PE=1 SV=1	PPP2CB	35.575	189.04	43	10	26	2	0.862	1.303	1.208	1.083	1.326	0.728	1.062	1.115	1.084	0.926	1.489	0.2896	1.074	0.52226	1.137	0.56416	1.17	0.24274	0.65	0.022862	1.169	0.099957
P62750	60S ribosomal protein L23a OS=Homo sapiens OX=9606 GN=RPL23A PE=1 SV=1	RPL23A	17.695	68.891	37.8	7	17	7	1.52	0.629	1.085	0.708	0.478	2.016	0.746	0.931	0.374	1.47	0.186	2.1459e-09	0.765	0.48462	1.454	3.2768e-06	0.482	2.4647e-14	3.18	1.71296e-12	0.676	4.1564e-05
P62753	40S ribosomal protein S6 OS=Homo sapiens OX=9606 GN=RPS6 PE=1 SV=1	RPS6	28.68	39.446	19.7	4	10	4	1.299	0.575	1.37	0.685	0.447	2.038	0.728	0.569	0.531	0.804	0.261	0.000179507	0.973	0.90406	1.882	0.000104547	0.852	0.165101	2.906	0.0053628	1.011	0.61552
P62805	Histone H4 OS=Homo sapiens OX=9606 GN=HIST1H4A PE=1 SV=2	HIST1H4A	11.367	89.387	52.4	8	27	8	0.837	1.183	0.886	1.664	0.76	0.626	1.491	0.926	1.066	0.88	1.703	5.6544e-05	1.204	0.32556	0.594	3.52385e-13	1.891	2.9976e-15	1.101	0.075919	1.278	4.9789e-09
P62820	Ras-related protein Rab-1A OS=Homo sapiens OX=9606 GN=RAB1A PE=1 SV=3	RAB1A	22.677	74.349	39.5	7	21	3	0.793	0.657	1.056	1.248	1.16	1.765	1.1	0.812	1.117	0.832	0.633	7.6506e-05	0.859	0.47758	0.96	0.54864	1.5	0.000104545	0.684	7.653e-05	0.809	0.047284
[truncated: 2,310 more rows]

## Sheet: Peptide_quant
ID	Sequence	Protein accession	Protein description	Charge	m/z	mass error [ppm]	PEP	Score	Unique [yes/no]	N11	N12	N13	N14	N15	N18	N27	N28	N7	N9
[truncated: 37,686 more rows]

## Sheet: Statistics
Peptide length	Number of peptides
[truncated: 30 more rows]
